# Supplementary material
Source: PubMed Central journal article supplement (PMC4652947)

## Supplementary Figure 9 Gating Hierarchy (Healthy Donor #6)

CD34<sup>+</sup>CD38<sup>low</sup>

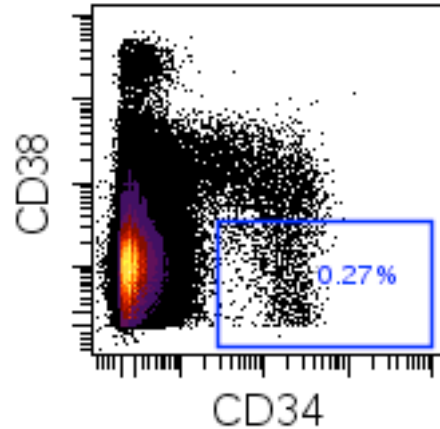

**Supplementary Figure 9:** Gating strategy is shown for each population. Cell events for normal sample #6 are shown. Gates for all samples were applied based on the gating of the normal samples. In almost all cases, the exact same gate boundaries defined by the normal samples was used for all AML samples (without regard to the cell distribution), in rare cases, minimal adjustments were made to separate NK cells from AML cells with bright aberrant CD7 expression. For mature cells of each lineage, a lineage population was first defined (blue box) and then each stage of maturation was sub-gated as shown. Some populations required multiple Boolean gates to achieve a pure cell population. In these cases, only events falling within all of the gates were considered to be in the population.

# Lineage negative

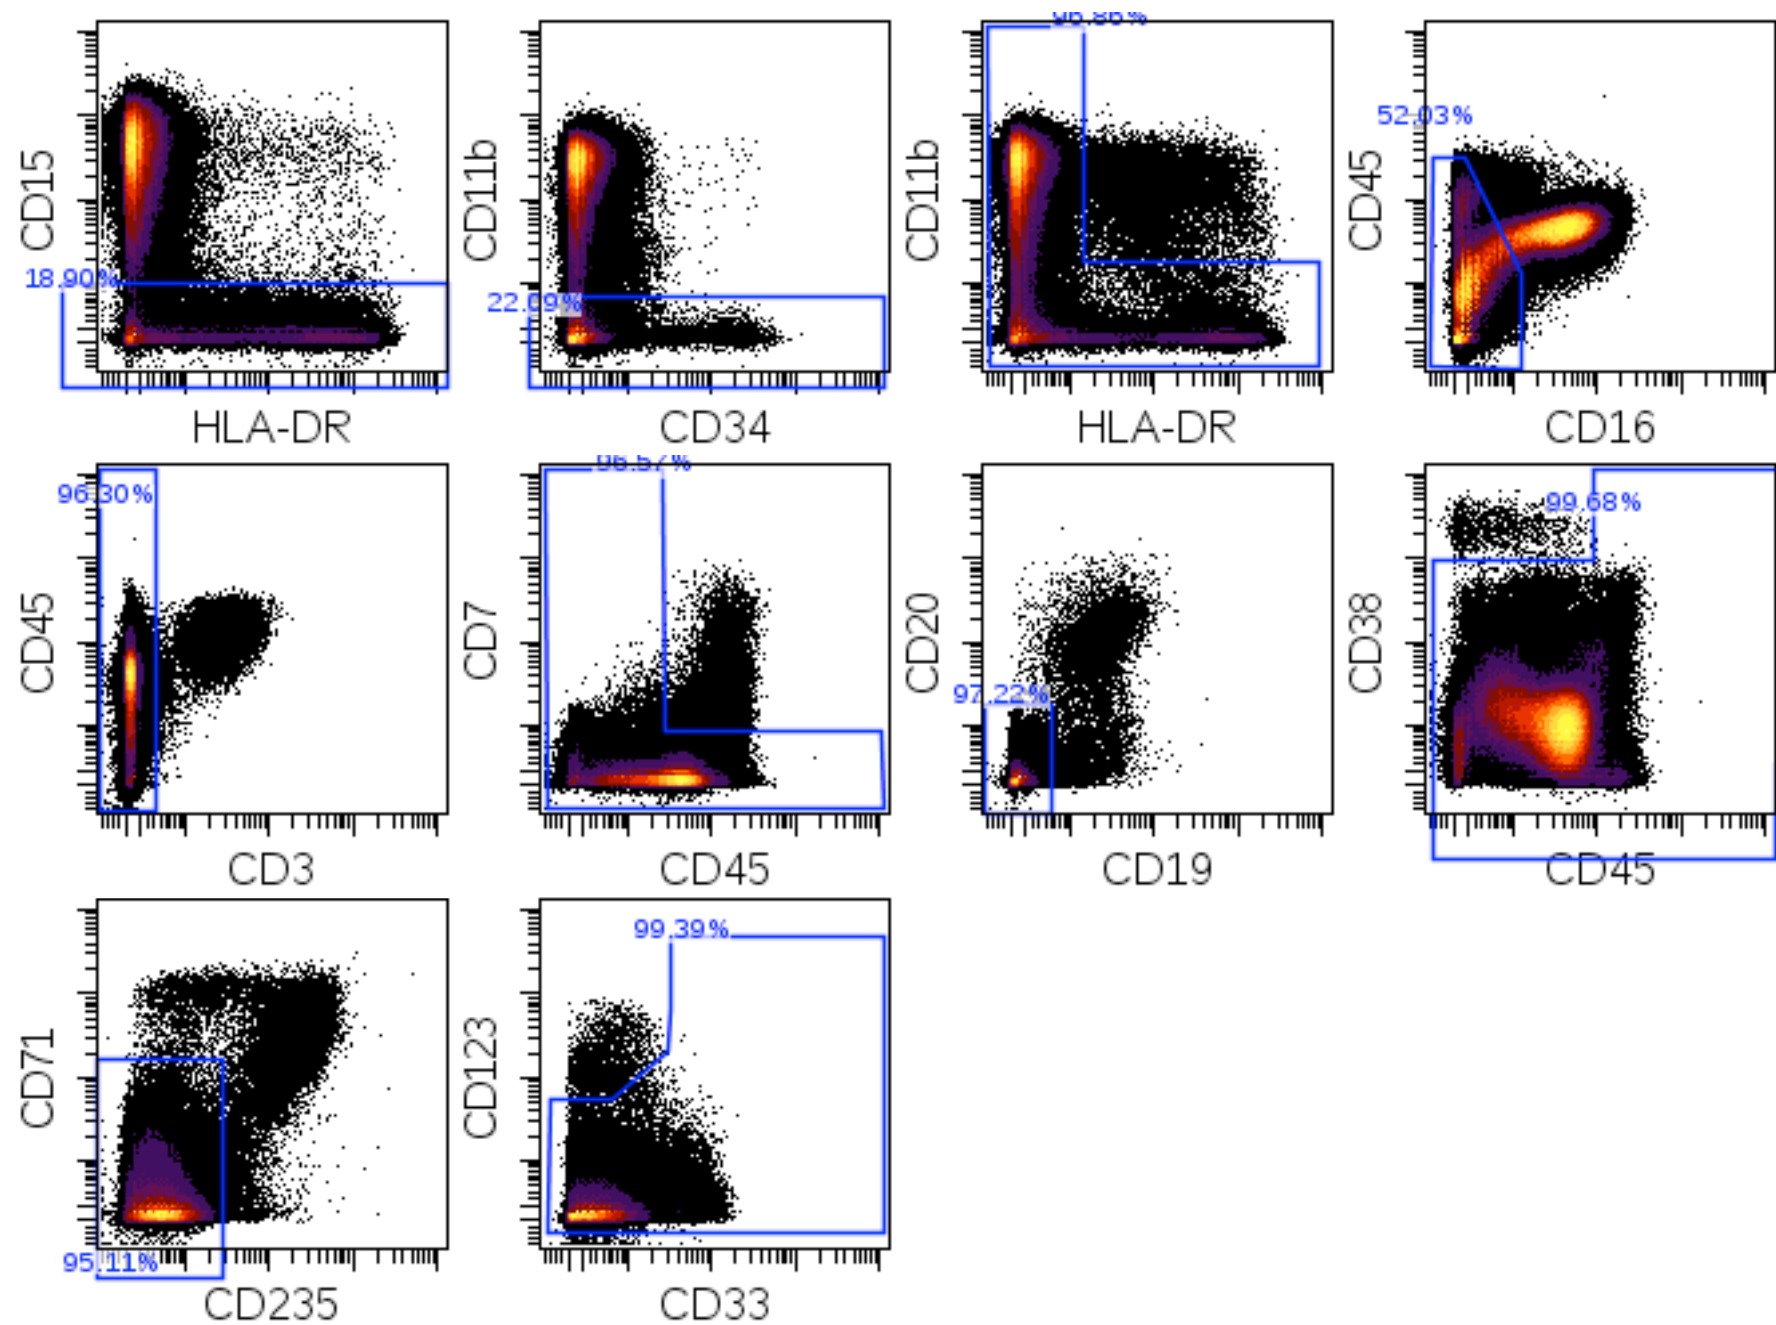

CD45RA<sup>neg</sup>CD34<sup>+</sup>CD38<sup>low</sup> (also lineage negative)

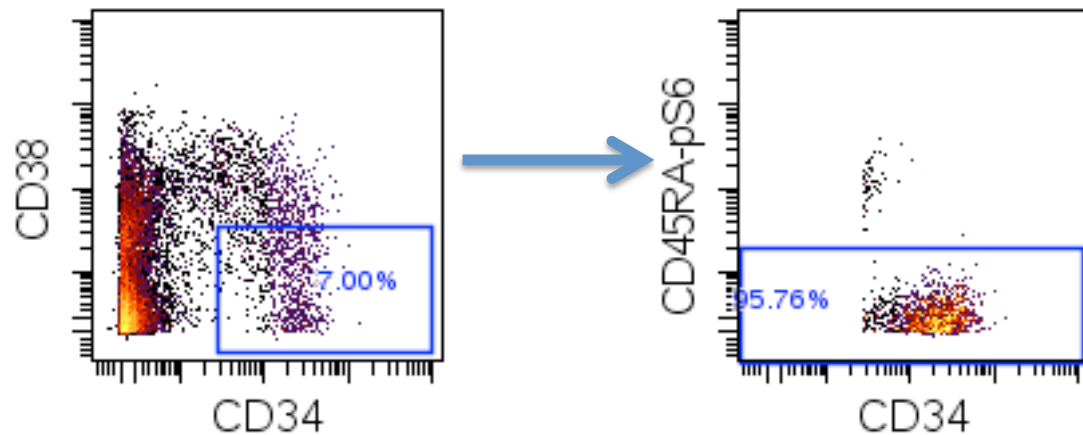

CD33<sup>neg</sup>CD34<sup>+</sup>CD38<sup>low</sup> (also lineage negative)

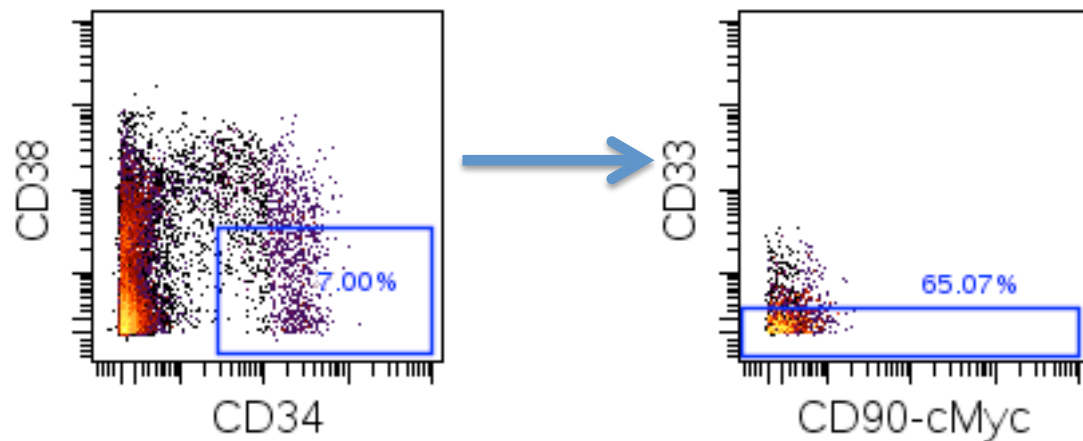

HSC-CD90<sup>hi</sup>CD33<sup>neg</sup> (also lineage negative)

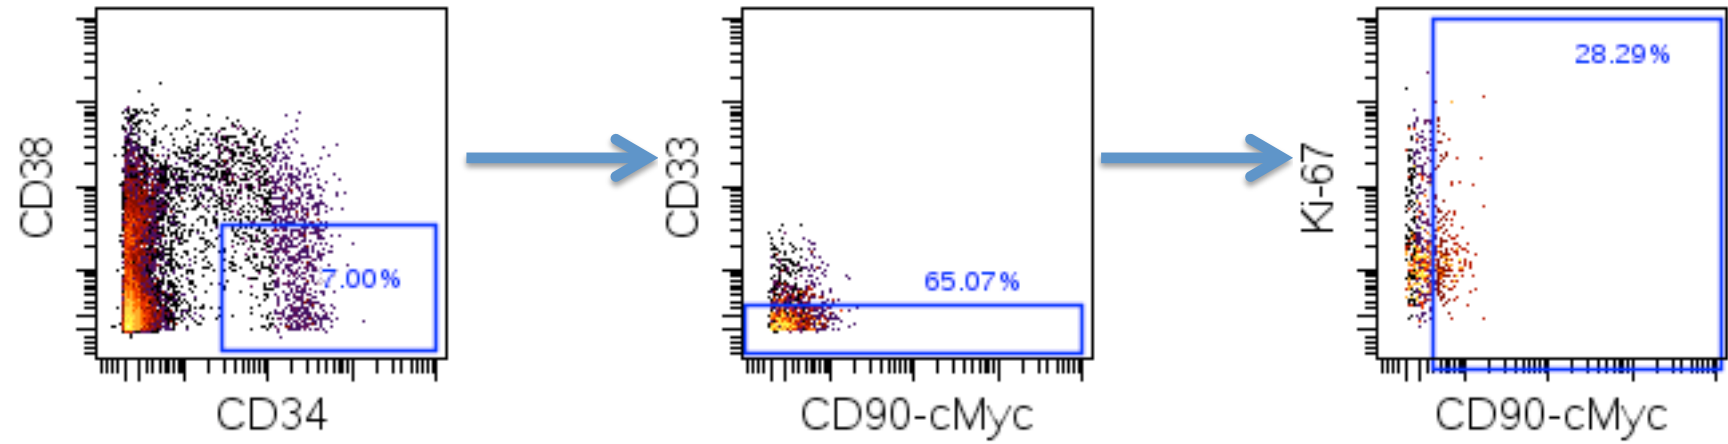

MPP-CD33<sup>neg</sup>CD34<sup>+</sup>CD38<sup>low</sup> (also lineage negative)

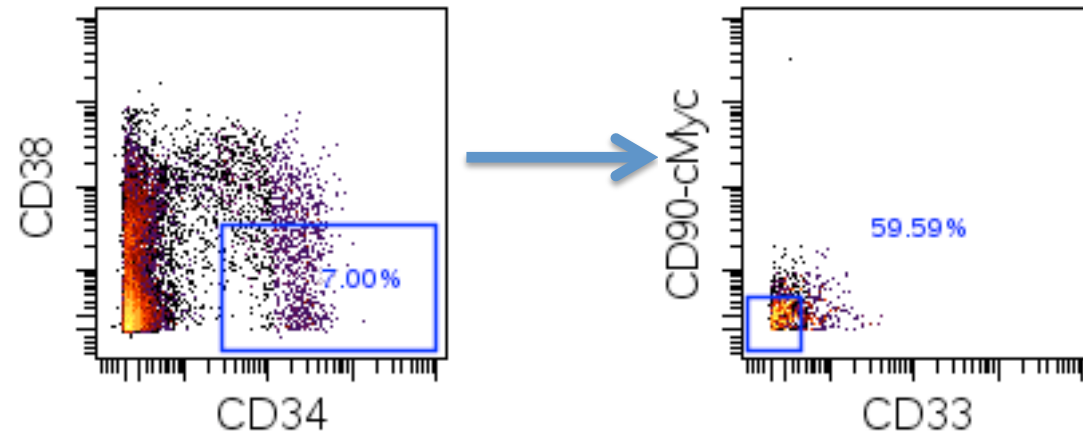

CMP-CD33midCD34+CD38<sup>low</sup> (also lineage negative)

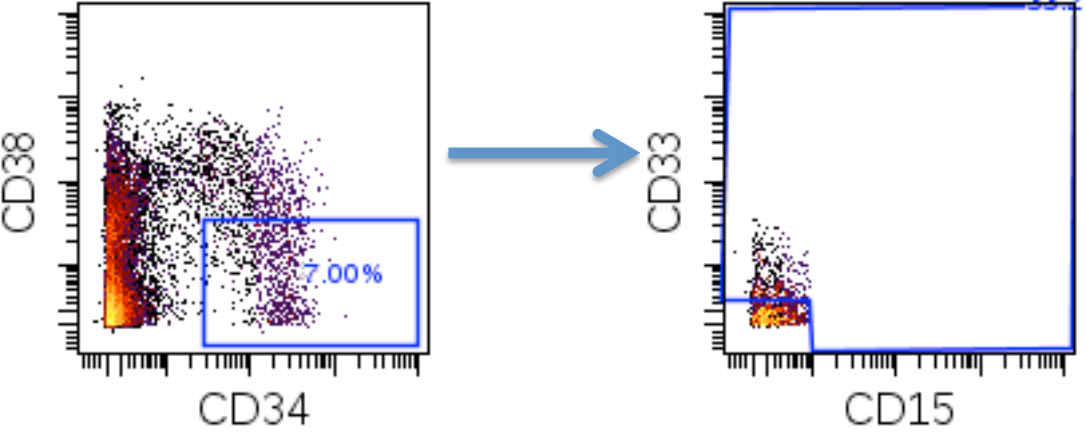

GMP-CD34+CD38+ (also lineage negative)

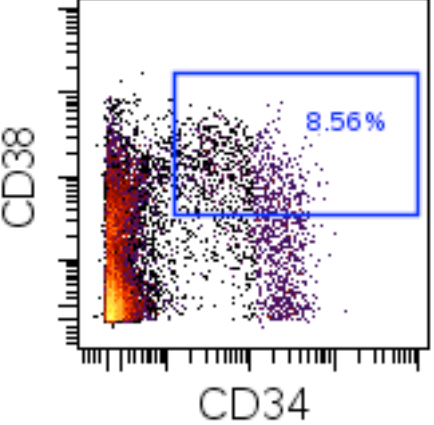

CD34<sup>neg</sup>CD38<sup>+</sup> Undifferentiated (also lineage negative)

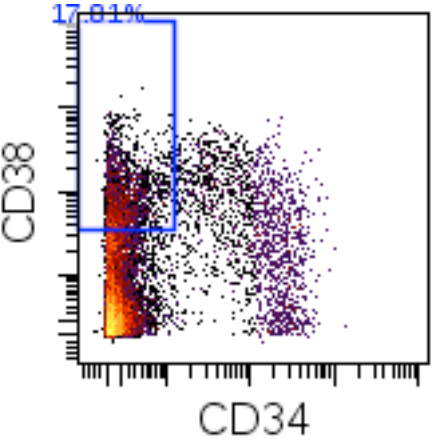

CD34<sup>neg</sup>CD38<sup>neg</sup> Undifferentiated (also lineage negative)

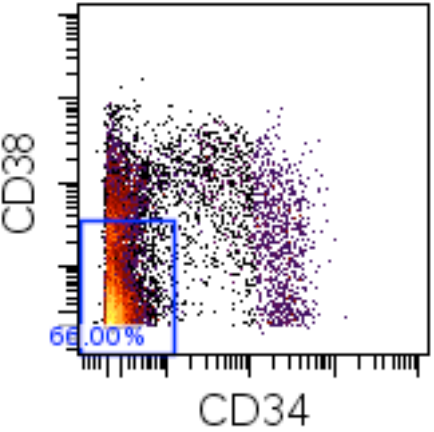

# Myelo/Monoblast

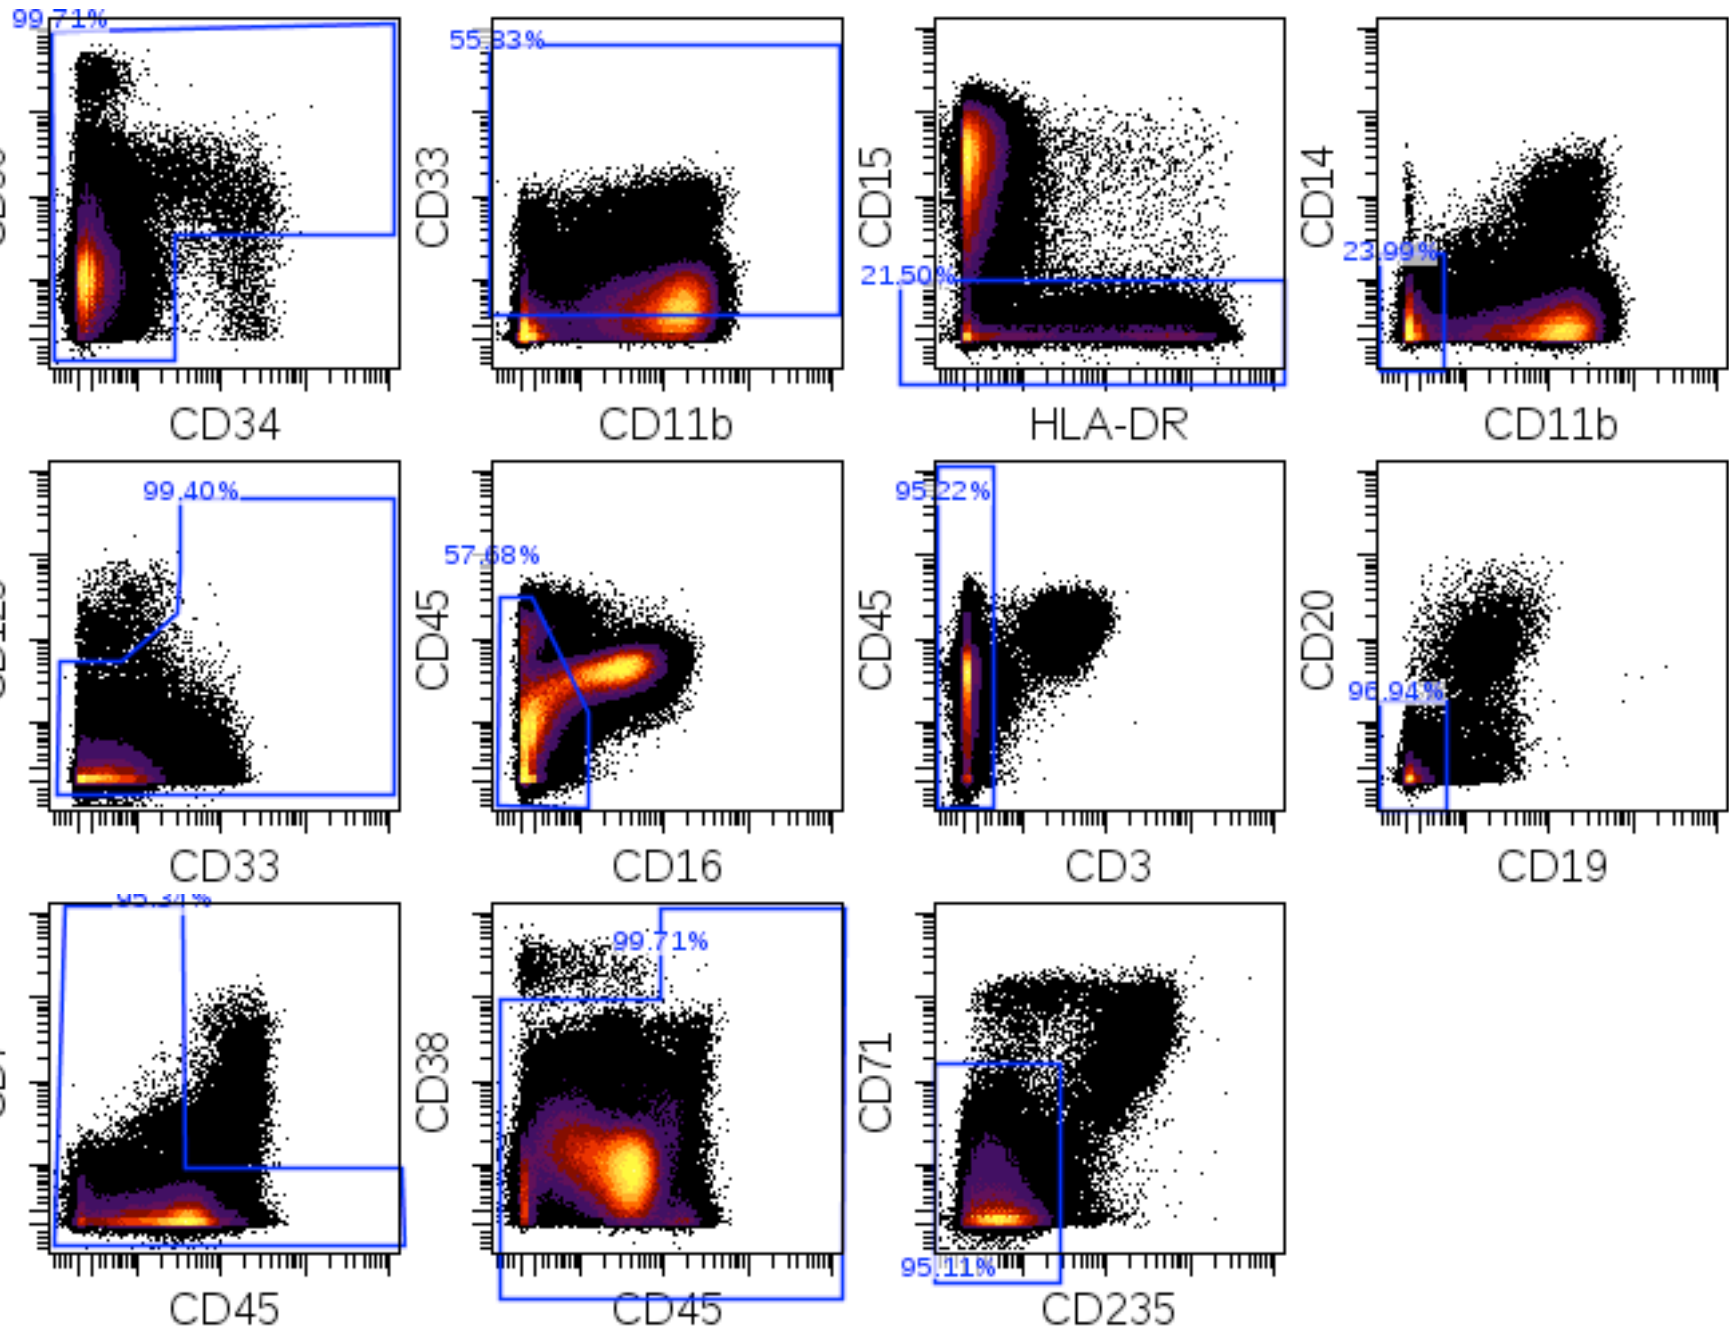

# Monocyte Lineage

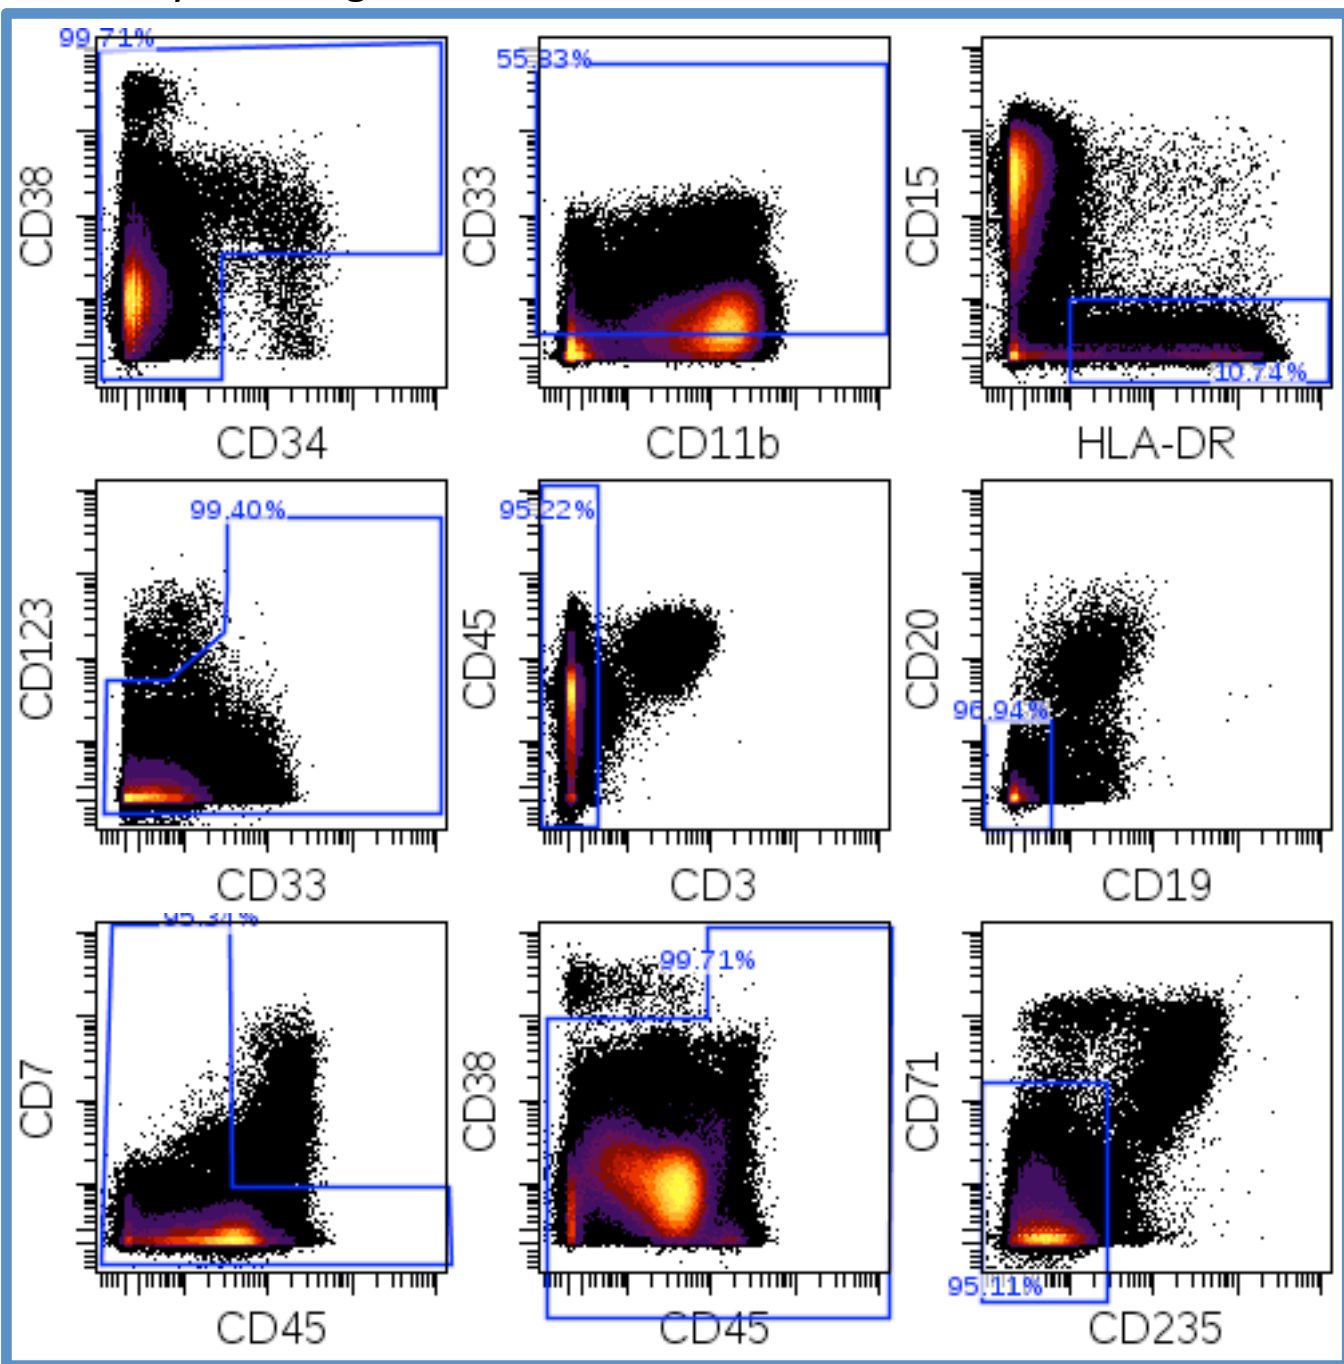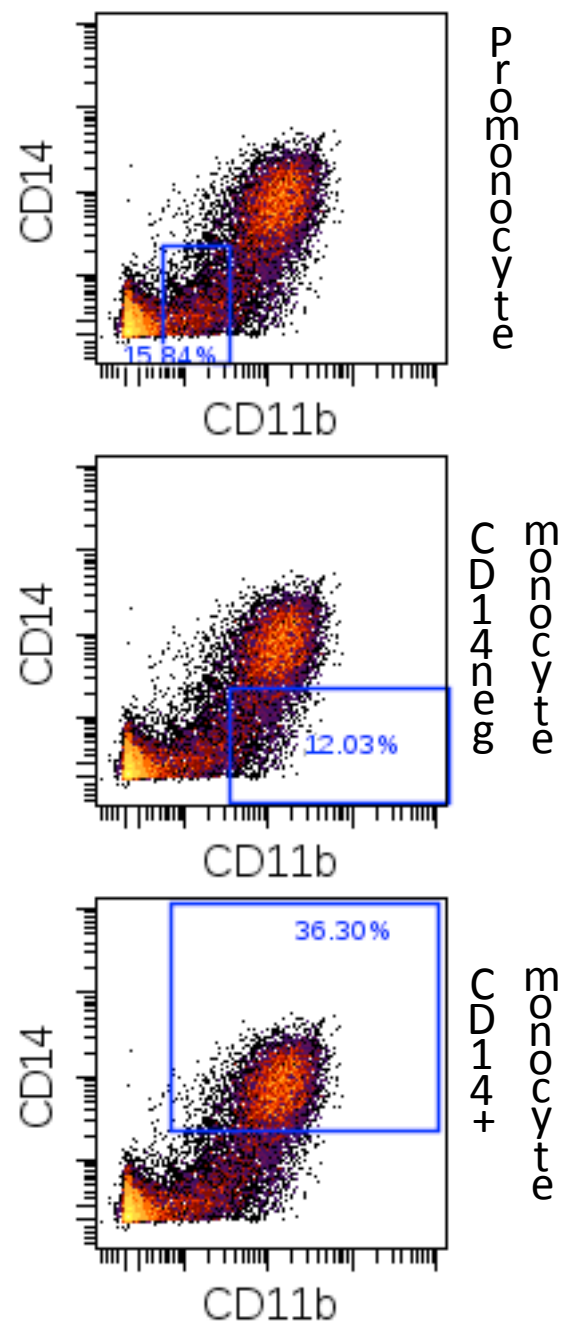



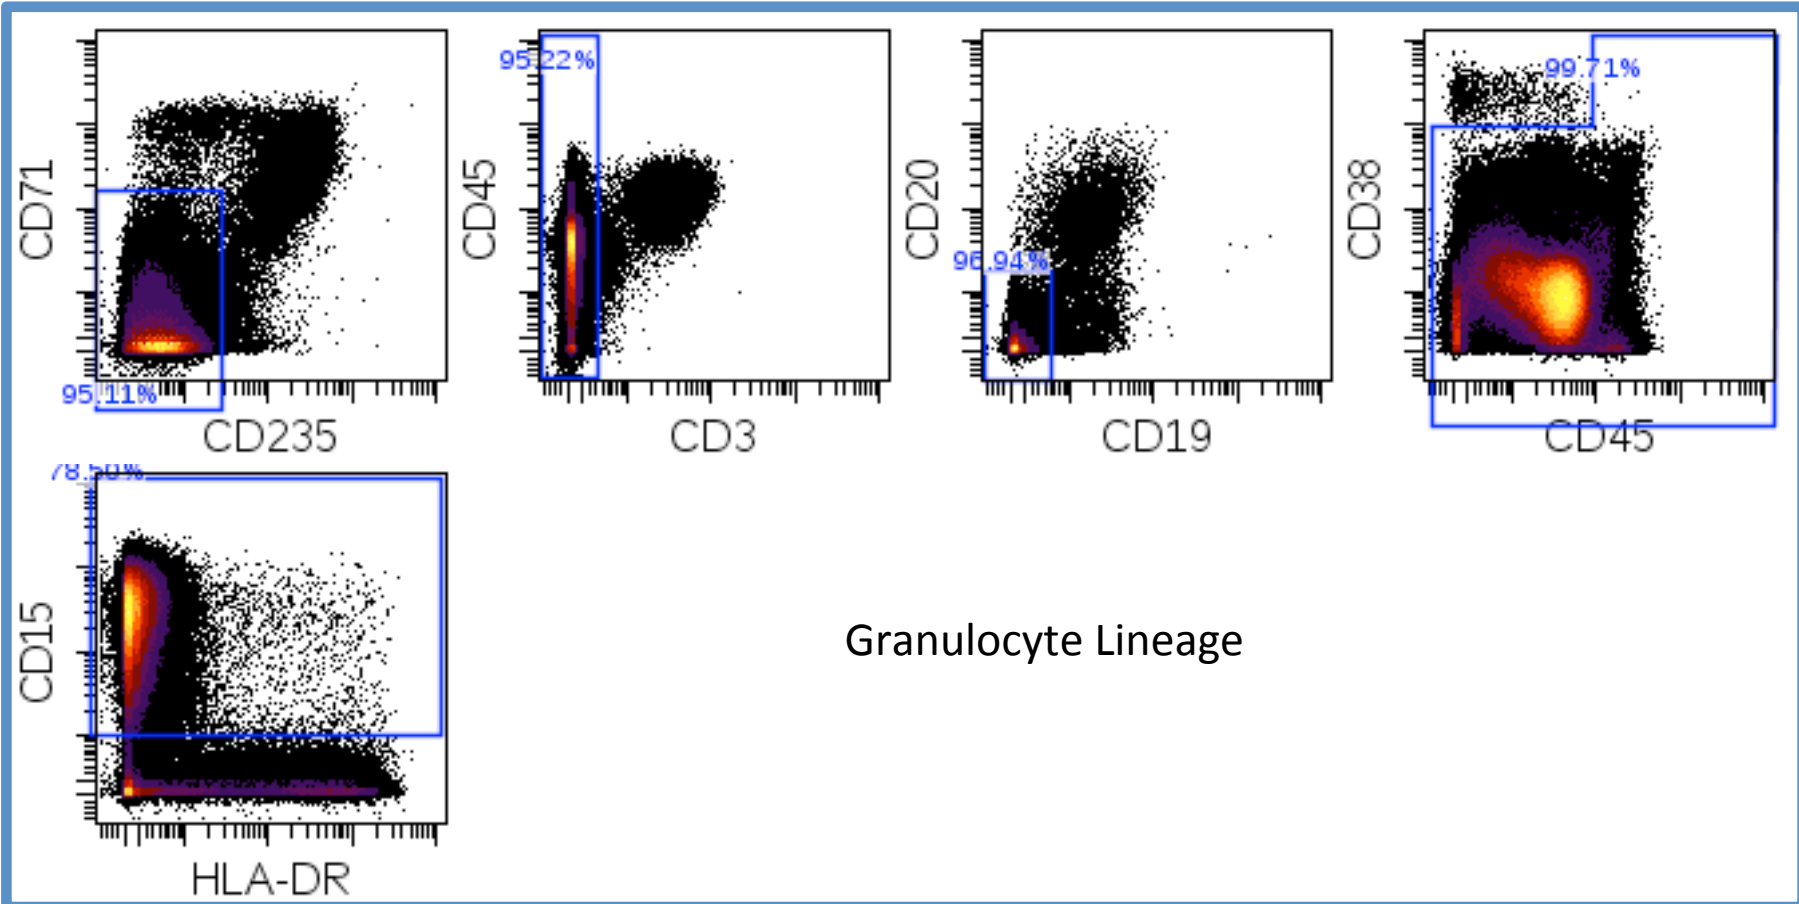

Promyelocyte

Myelocyte

Metamyelocyte

Mature Granulocyte

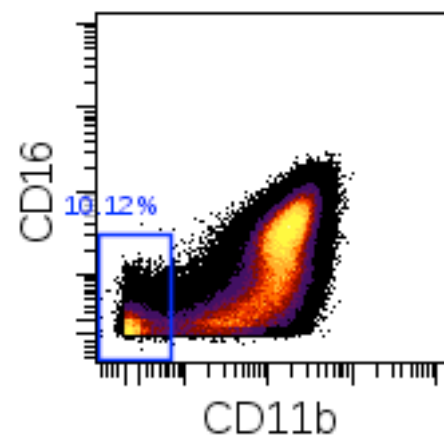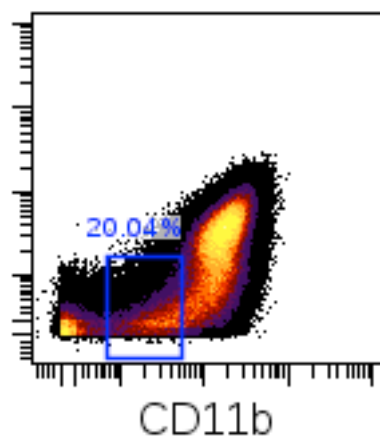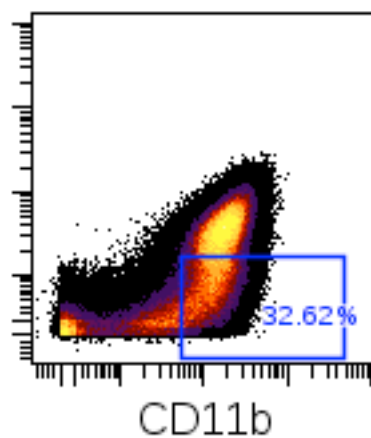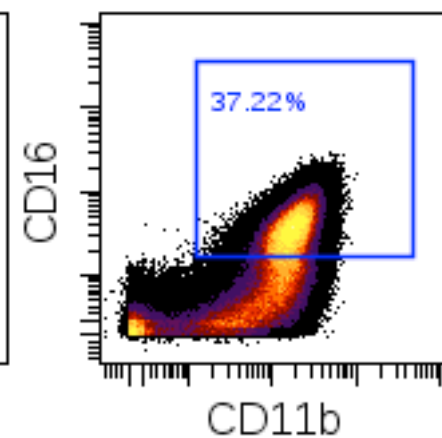

# Erythroid Lineage

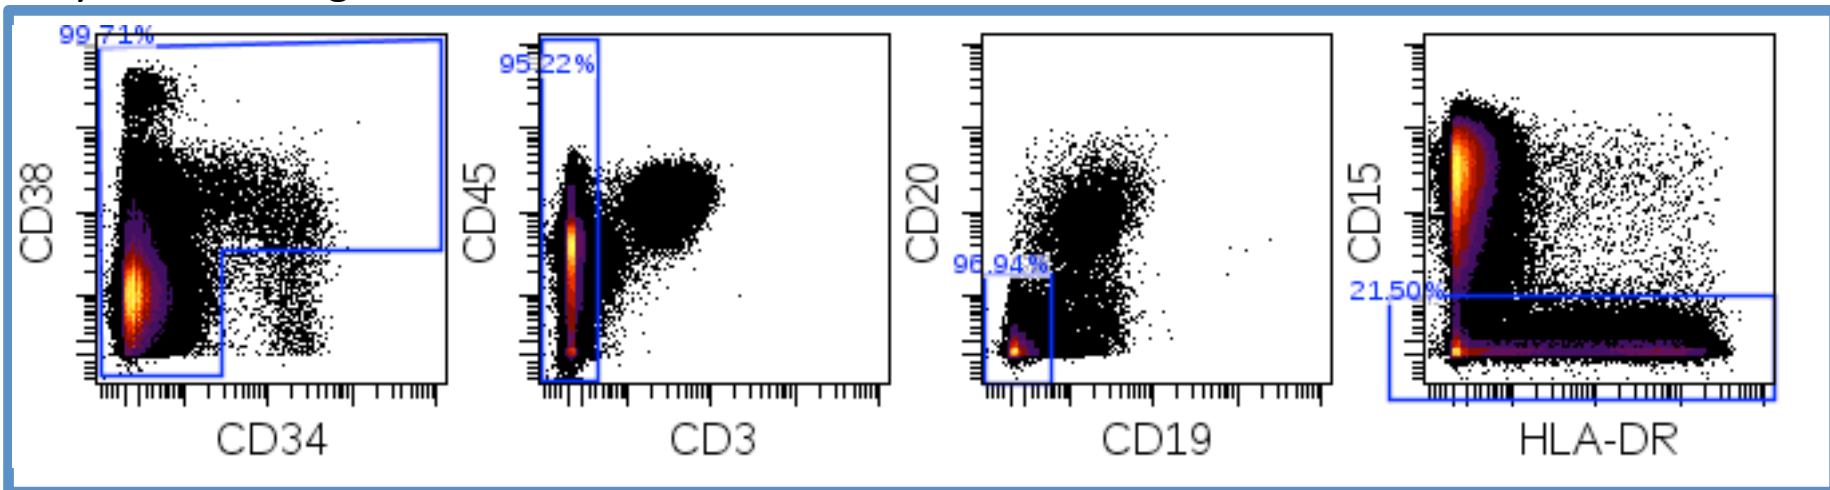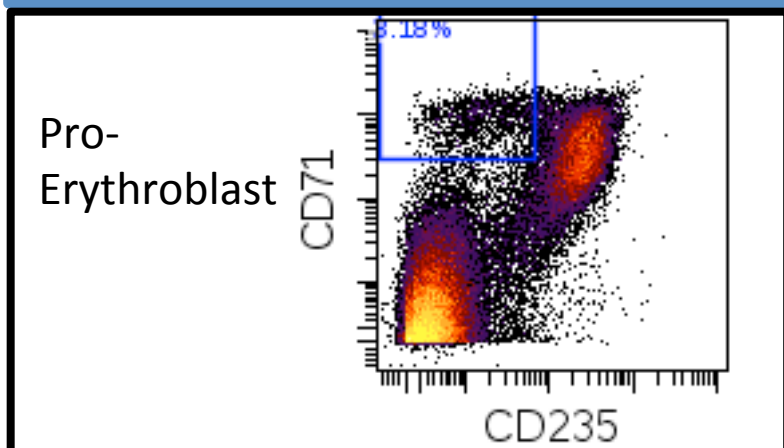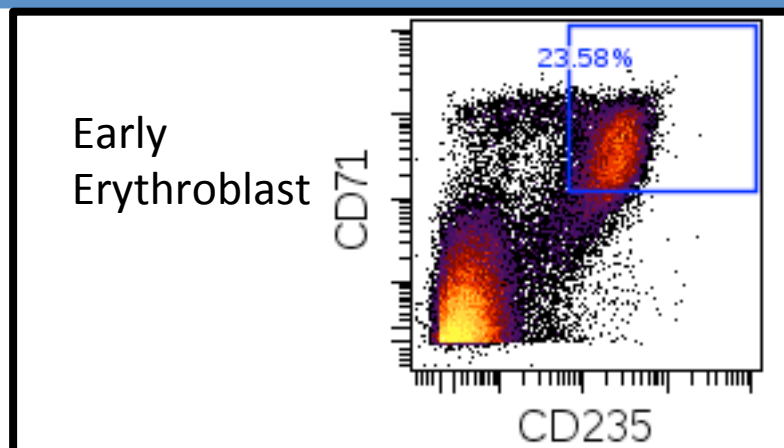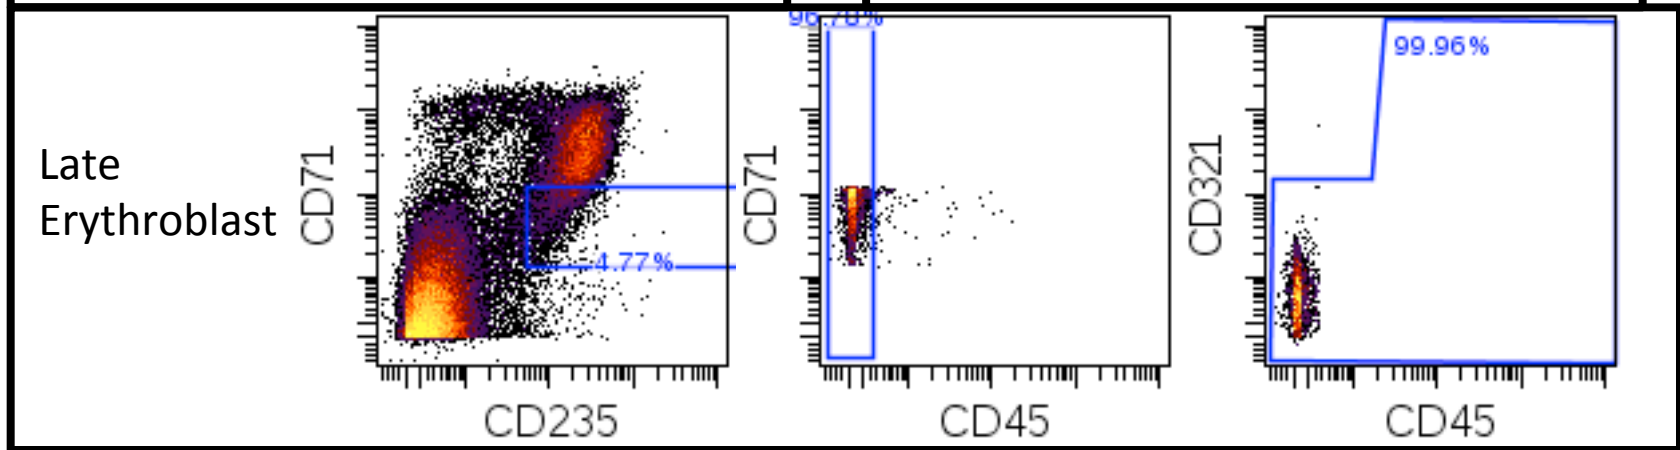

## B Lineage Cells

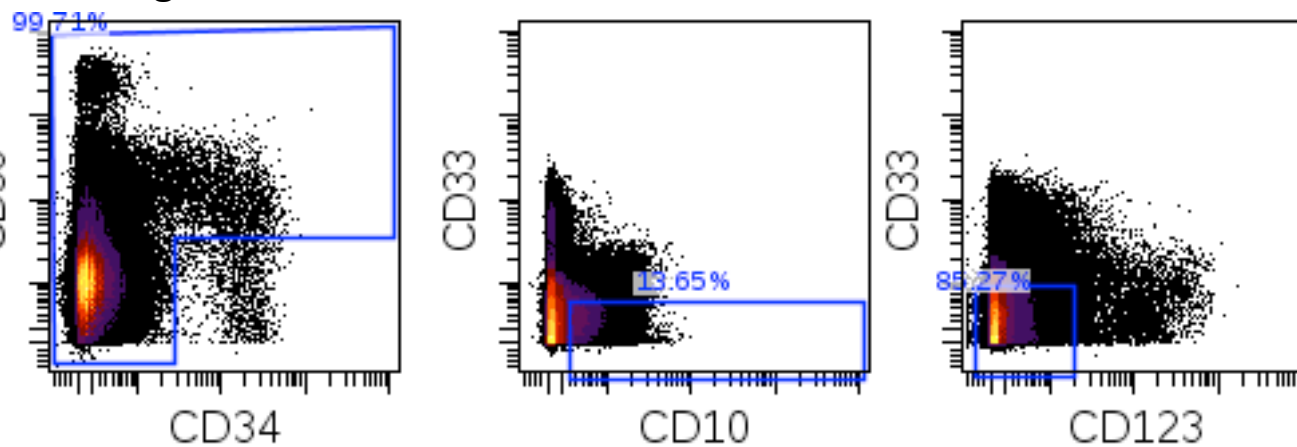

## Pre-B Cells

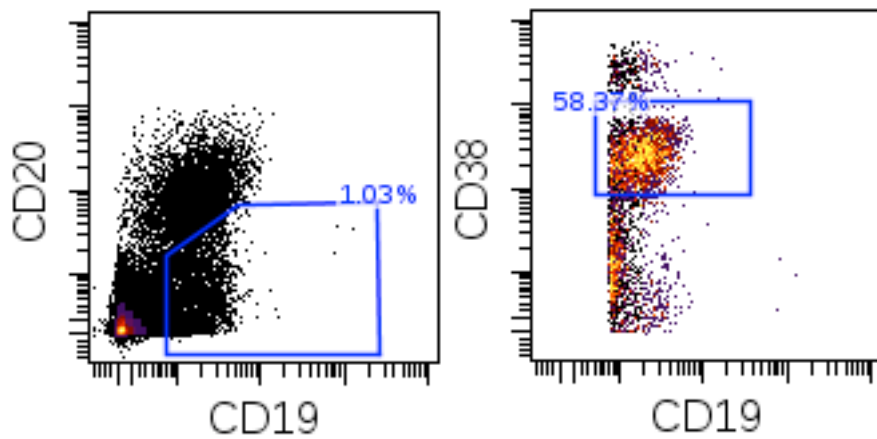

## Mature B Cells

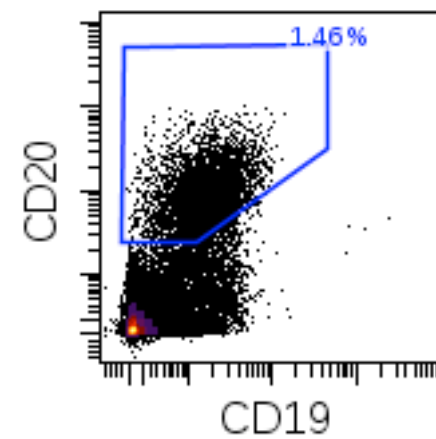

## Plasma Cells

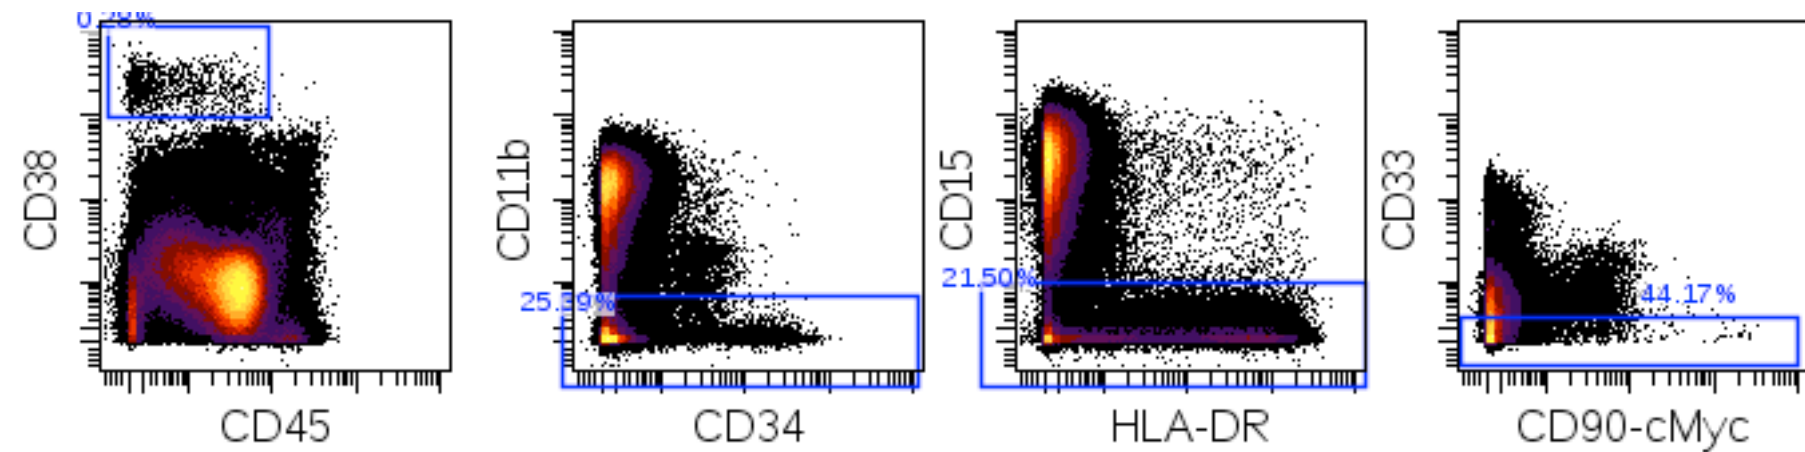

## T Cells

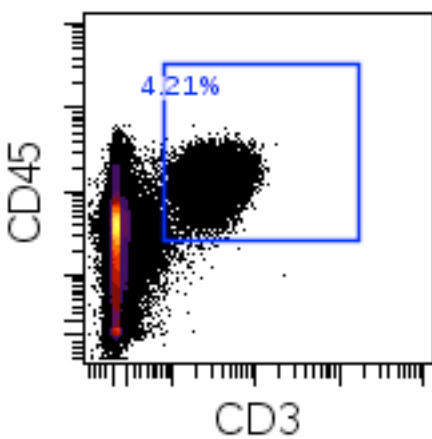

## NK Cell

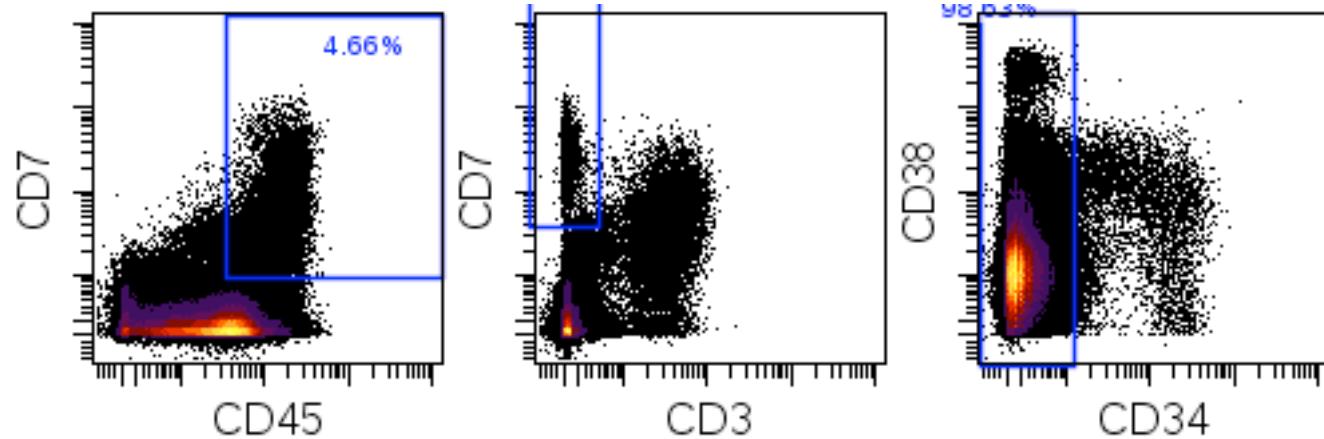

## pDCs

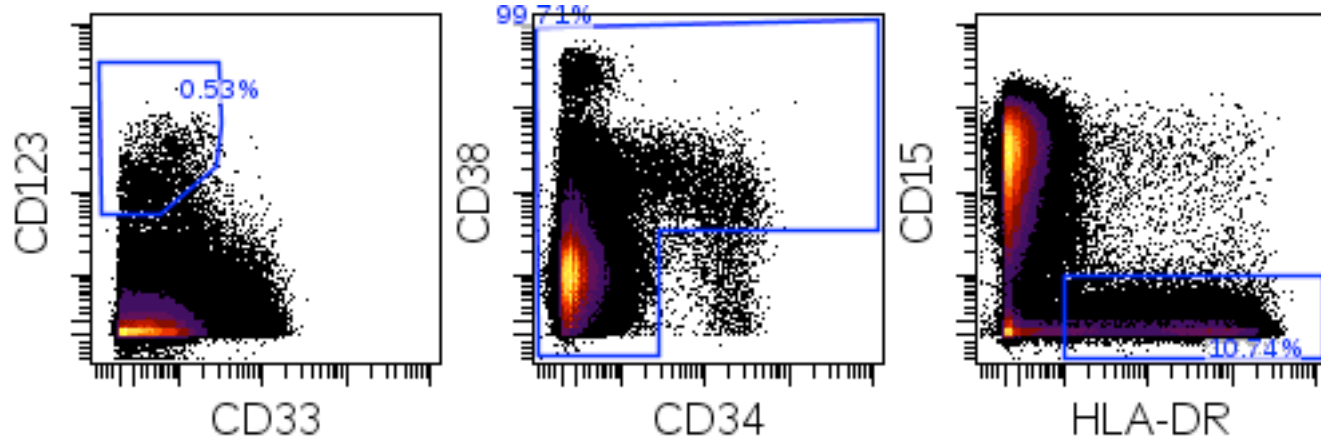

## Basophils

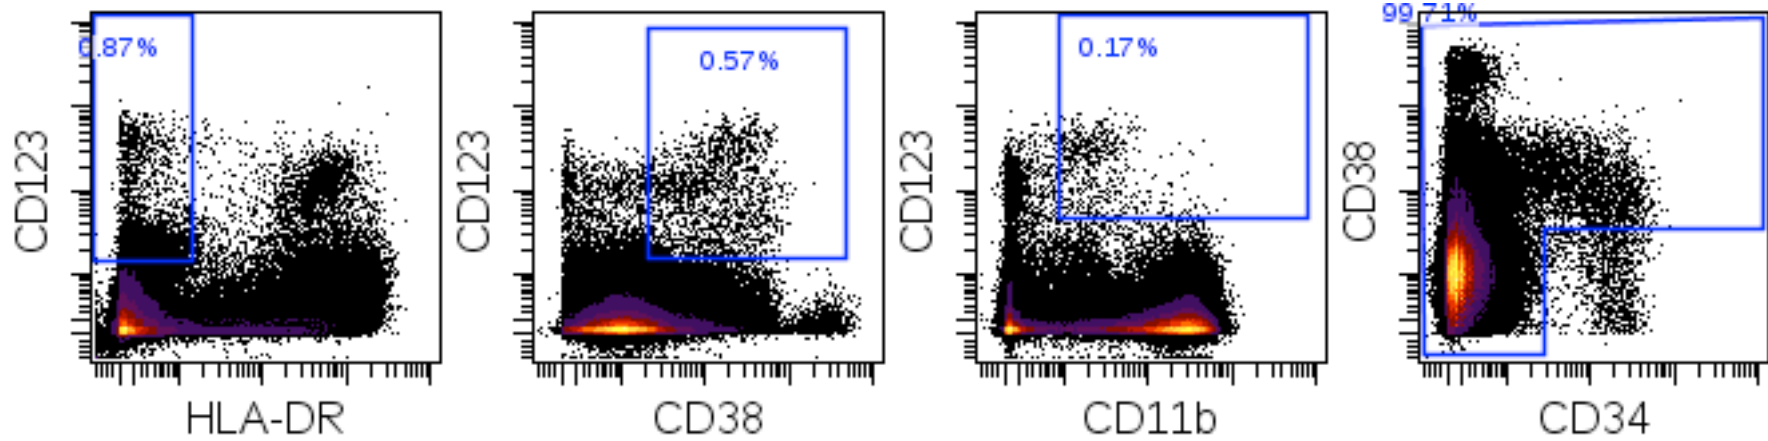

# Platelets

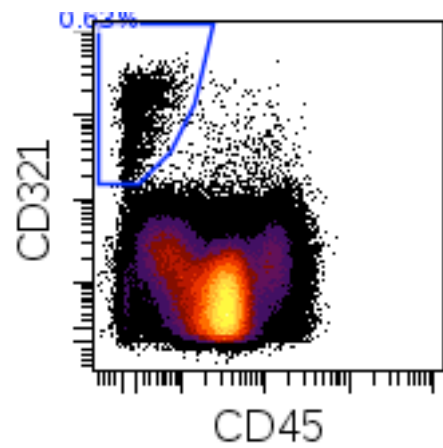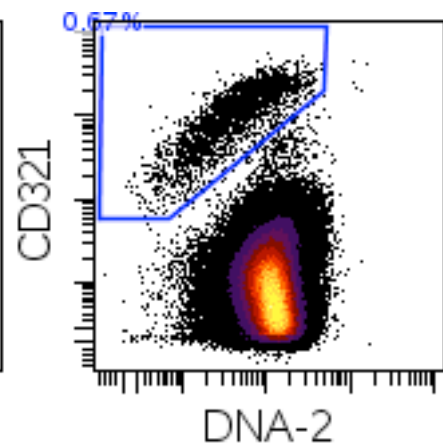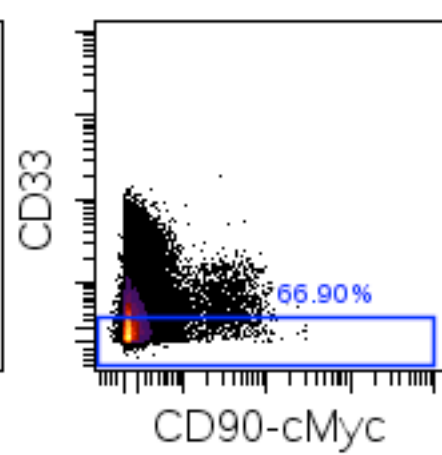

Supplement: NIHMS702883-supplement-4.pdf [file NIHMS702883-supplement-4.pdf]
