# Supplementary material
Source: PubMed Central journal article supplement (PMC4652947)
Supplement: NIHMS702883-supplement-3.pdf [file NIHMS702883-supplement-3.pdf]

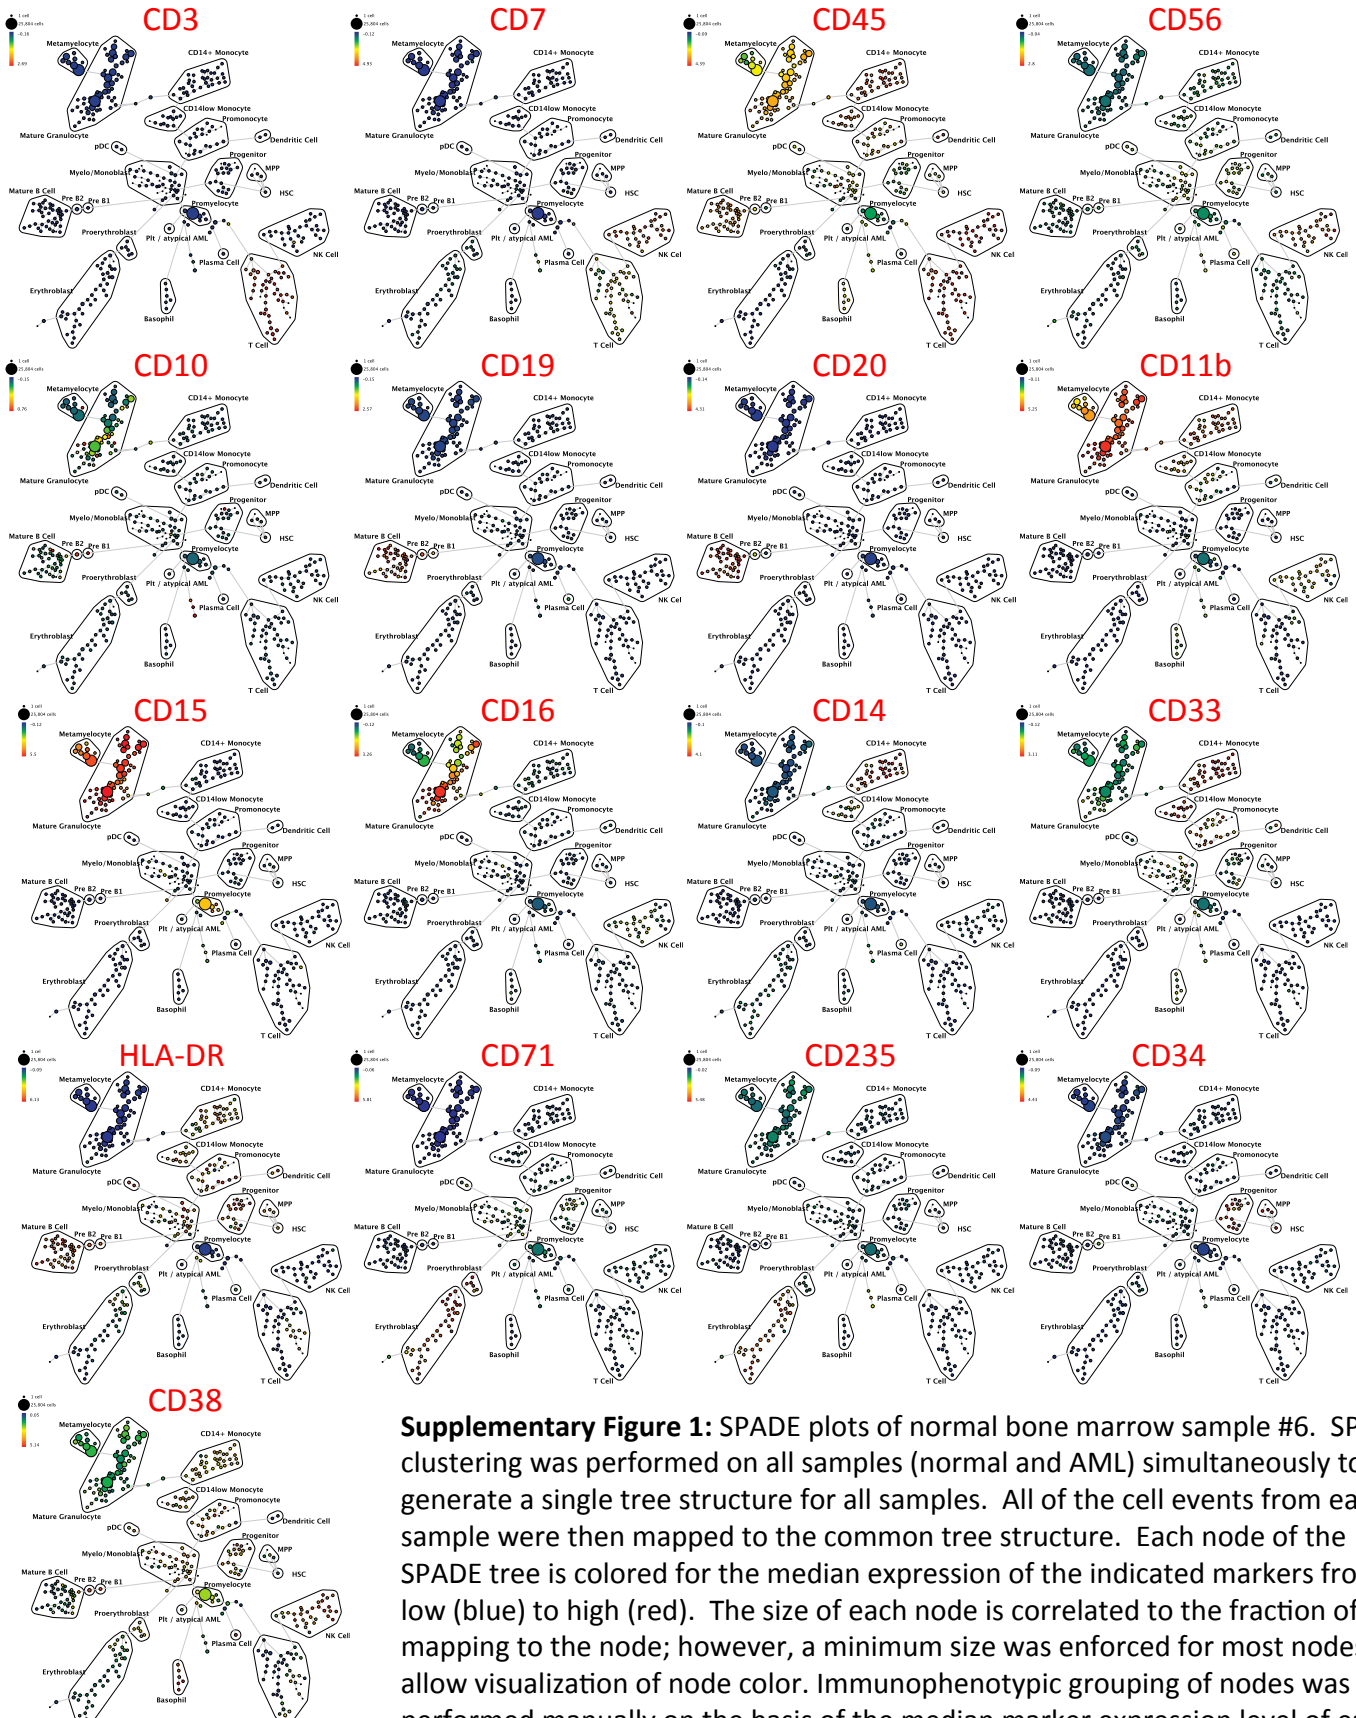

**Supplementary Figure 1:** SPADE plots of normal bone marrow sample #6. SPADE clustering was performed on all samples (normal and AML) simultaneously to generate a single tree structure for all samples. All of the cell events from each sample were then mapped to the common tree structure. Each node of the SPADE tree is colored for the median expression of the indicated markers from low (blue) to high (red). The size of each node is correlated to the fraction of cells mapping to the node; however, a minimum size was enforced for most nodes to allow visualization of node color. Immunophenotypic grouping of nodes was performed manually on the basis of the median marker expression level of each node, and based on analysis of the relevant biaxial plots (e.g., CD38 vs. CD34).

# Cell Numbers (%)

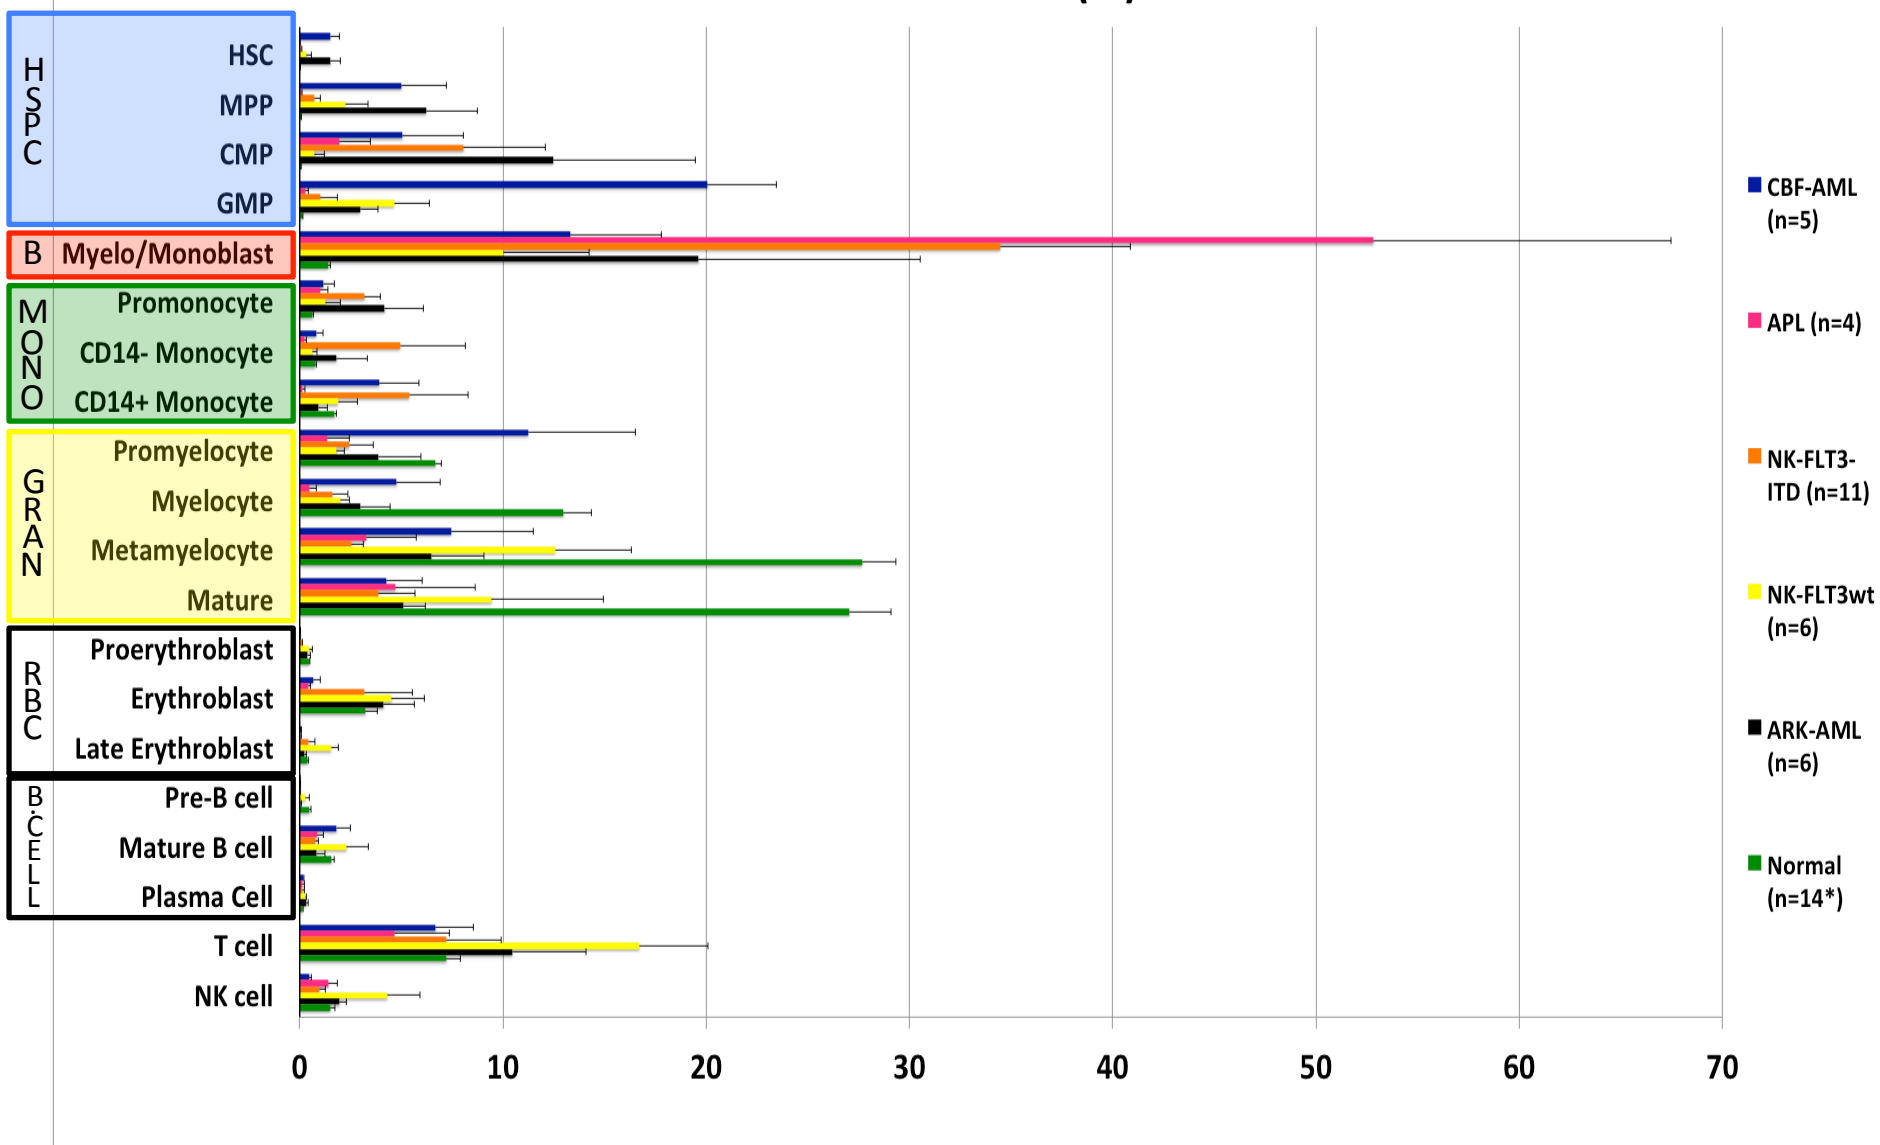

**Supplementary Figure 2:** The frequency of cells in the indicated (manually-gated) populations. Colored boxes group immunophenotypic populations. HSPC, hematopoietic stem and progenitor cells; B, blasts (immunophenotypic); Mono, = monocyte lineage cells; Gran, granulocyte lineage; RBC, red blood cell lineage; B-Cell, B cell lineage. Error bars indicate standard errors.

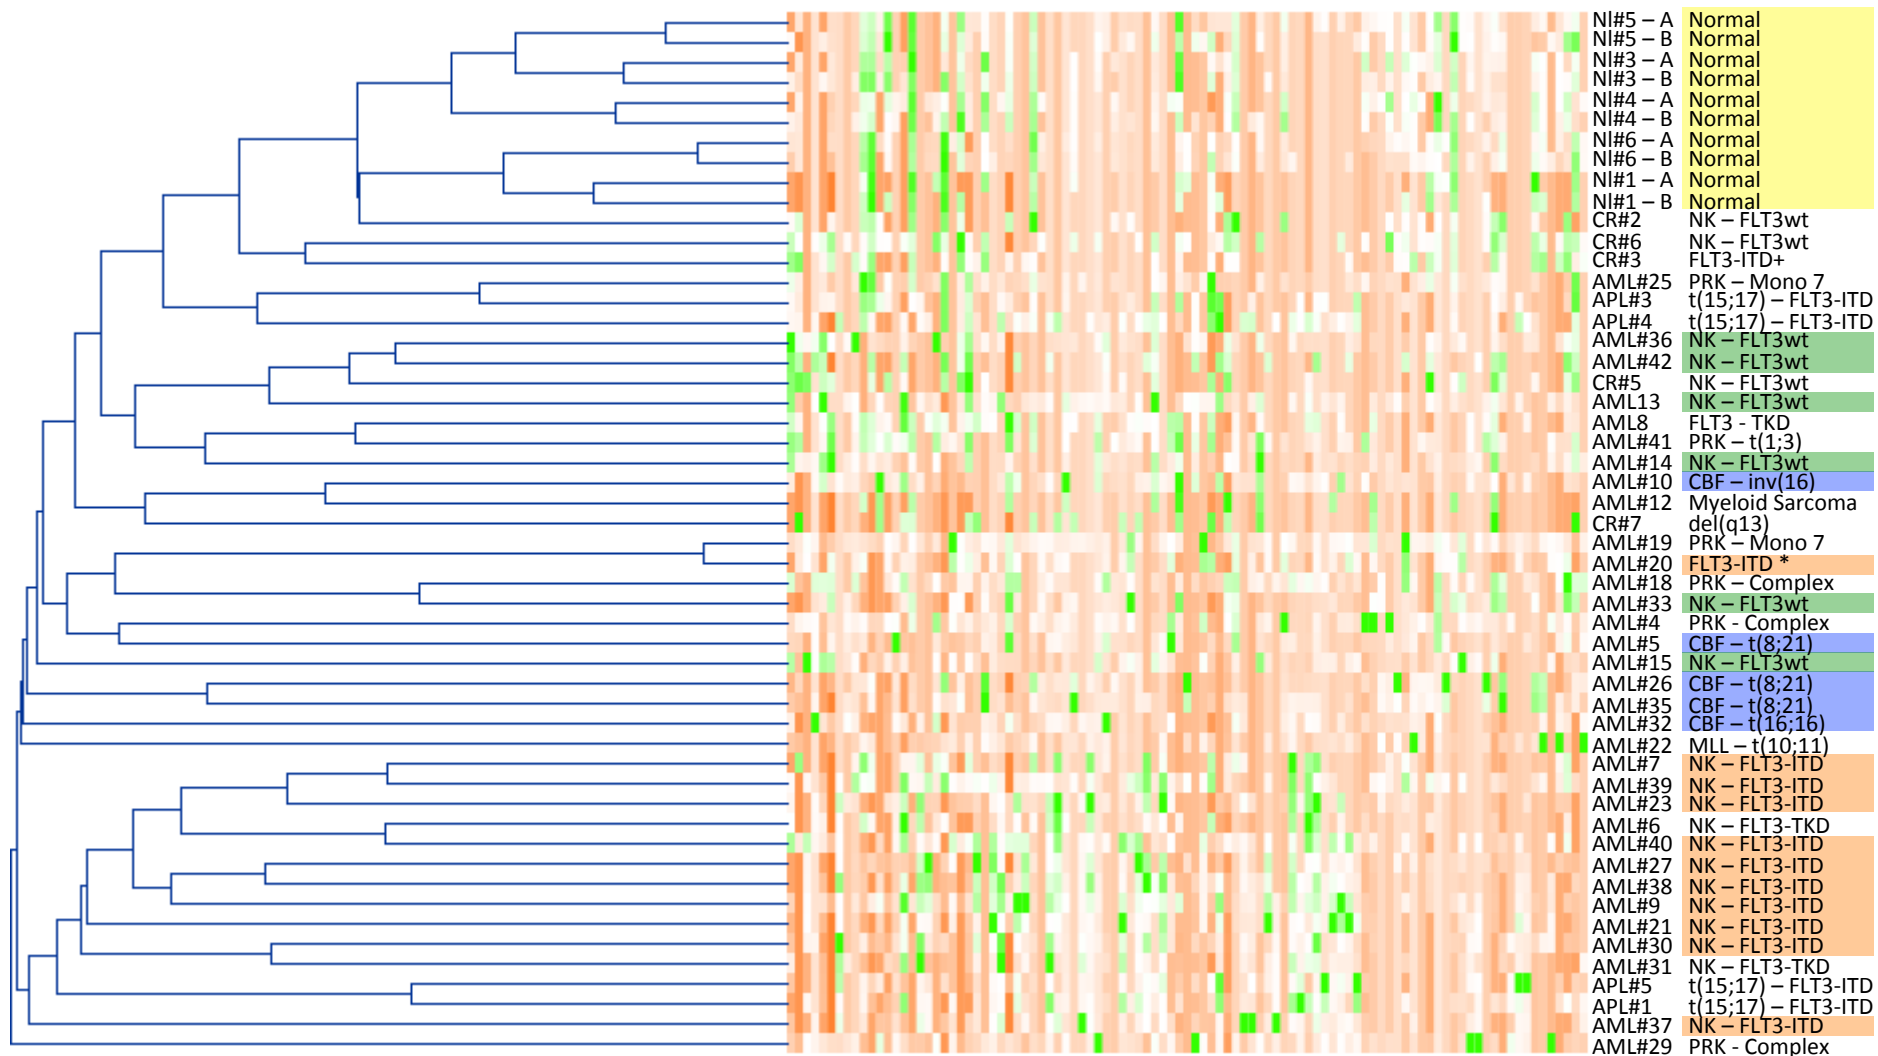

**Supplementary Figure 3:** Multi-dimensional binning analysis of the CD34<sup>+</sup>CD38<sup>low</sup> subset confirmed that distinct karyotype and genotype-specific immunophenotypic patterns are observed in high-dimensional space. Hierarchical grouping of normal and AML samples based on the pairwise correlation of the distribution of cells across the 100 multi-dimensional bins are shown.

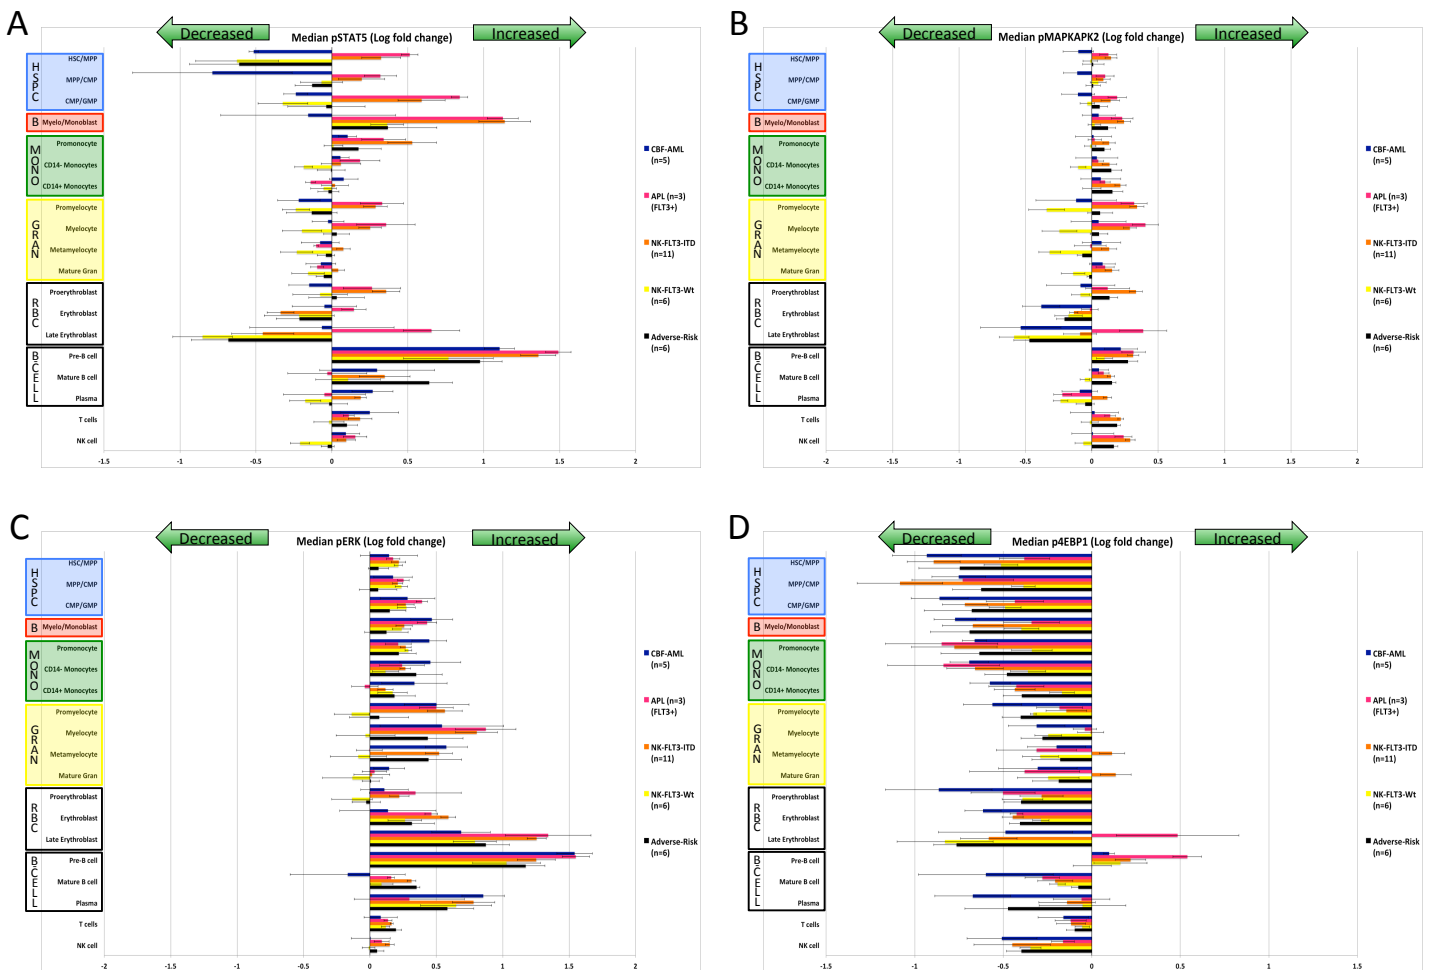

**Supplementary Figure 4:** AML subtypes are characterized by distinct phosphoprotein signaling patterns. Log fold change in phosphoprotein staining relative to normal cells within each gated immunophenotypic population. Measured phosphoproteins are: **A)** pSTAT5, **B)** pMAPKAPK2, **C)** pERK, and **D)** p4E-BP1. Colored boxes group immunophenotypic populations: HSPC, hematopoietic stem and progenitor cells; B, blasts (immunophenotypic); Mono, monocyte lineage cells; Gran, granulocyte lineage; RBC, red blood cell lineage; B-Cell, B cell lineage. Error bars indicate standard errors.

Supplementary Figure 5A

Normal 1

Normal 3

Normal 4

Normal 5

Normal 6

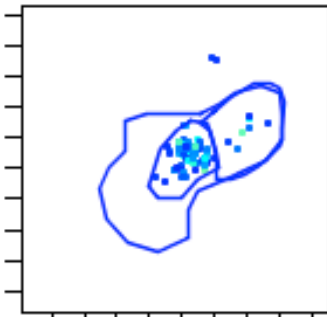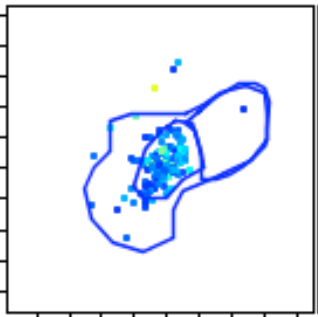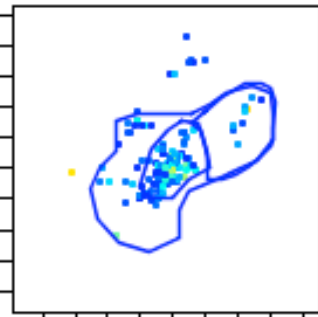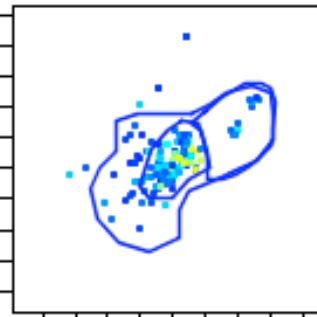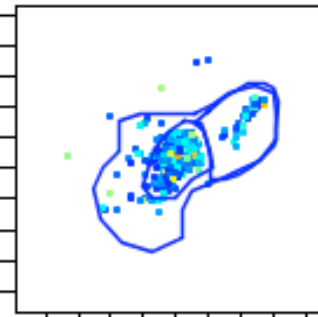

AML26 – t(8;21)

AML35 – t(8;21)

AML22 – t(10;11)

APL4 – FLT3-ITD+

APL5 – FLT3-ITD+

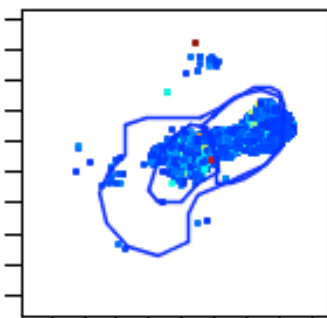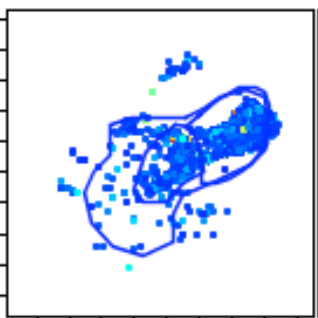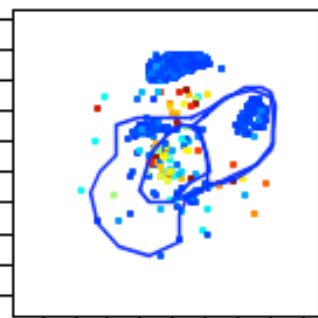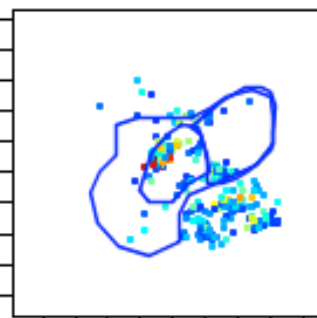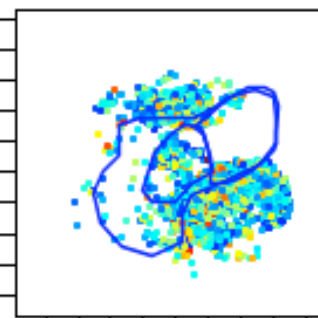

AML9 – FLT3-TID+

AML21 – FLT3-ITD+

AML23 – FLT3-ITD+

AML27 – FLT3-ITD+

AML14 – NK-AML

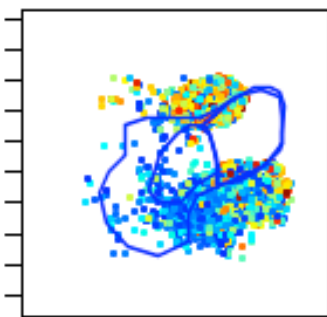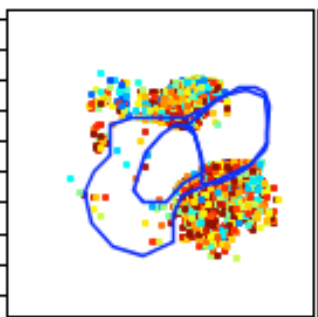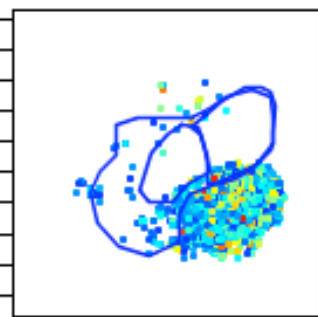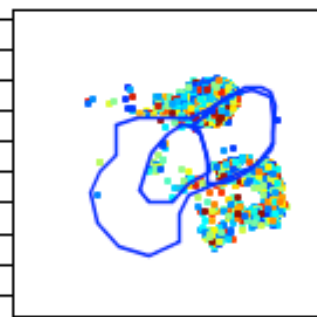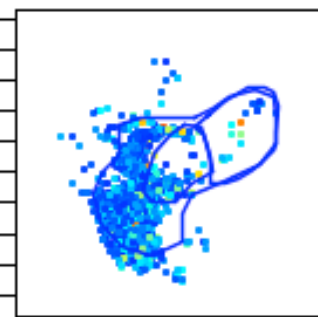

tSNE-2  
↑  
tSNE-1  
→

z = p-STAT5

Supplementary Figure 5B

Normal 1

Normal 3

Normal 4

Normal 5

Normal 6

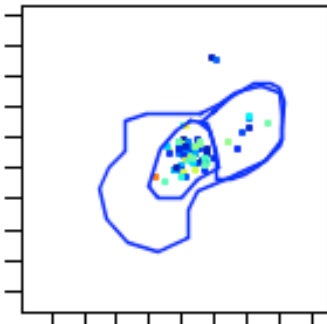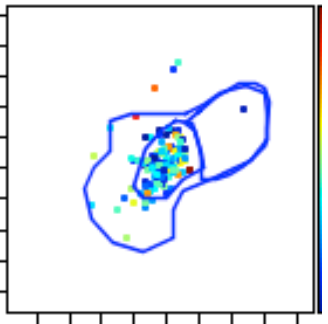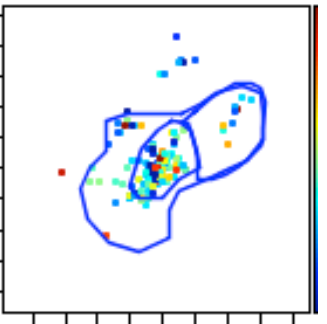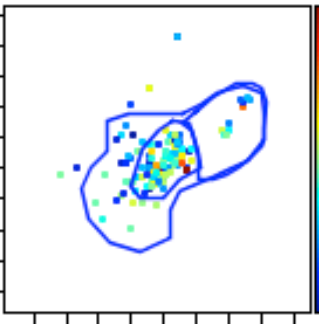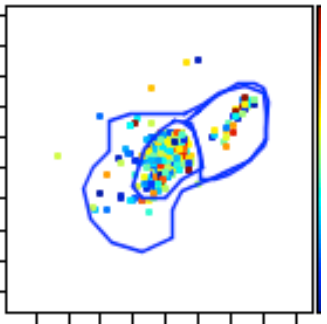

AML26 – t(8;21)

AML35 – t(8;21)

AML22 – t(10;11)

APL4 – FLT3-ITD+

APL5 – FLT3-ITD+

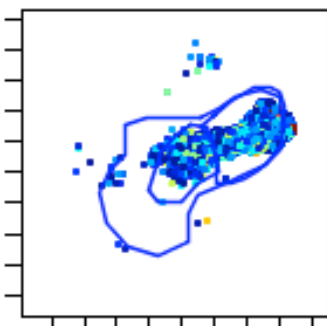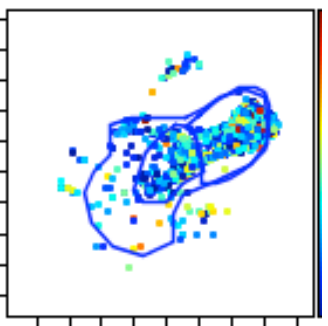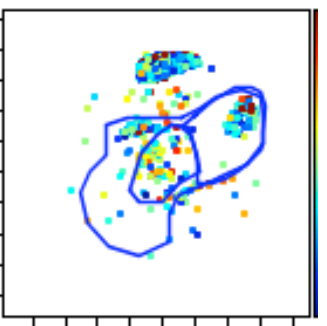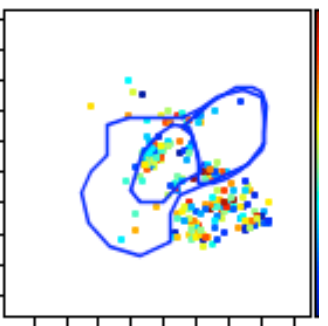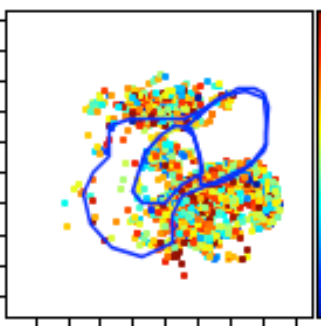

AML9 – FLT3-TID+

AML21 – FLT3-ITD+

AML23 – FLT3-ITD+

AML27 – FLT3-ITD+

AML14 – NK-AML

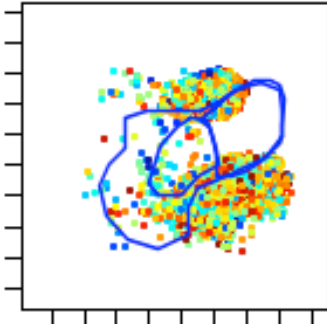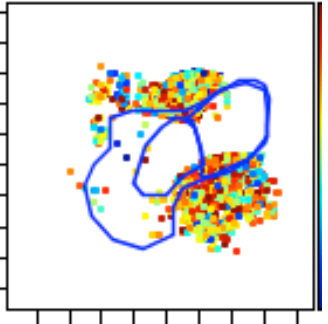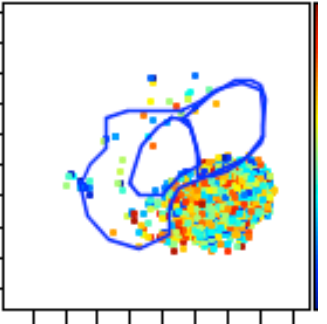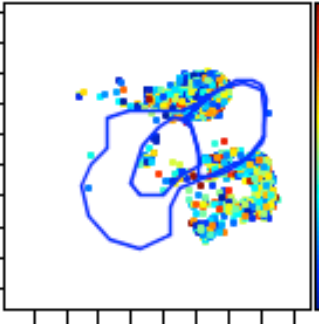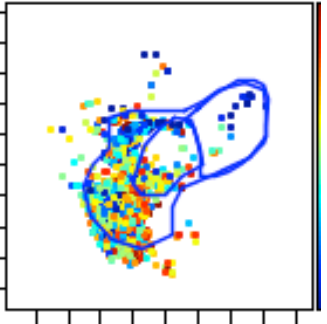

tSNE-2

tSNE-1

z = p-MAPKAPK2

**Supplementary Figure 5:** viSNE analysis of CD34<sup>+</sup>CD38<sup>low</sup> subset demonstrates signaling aberrancy is most pronounced in cells outside the viSNE space occupied by normal cells. Samples were analyzed across 19 surface marker dimensions (as in Figure 5) and then each cell event was colored for the phospho-epitope staining of **A**) pSTAT5 or **B**) pMAPKAPK2. Blue cell events have the lowest levels of staining while red cell events exhibit the highest levels. The AML subtype is indicated for each sample.

Supplementary  
Figure 6 A

pSTAT5 Medians (CD34+CD38low)

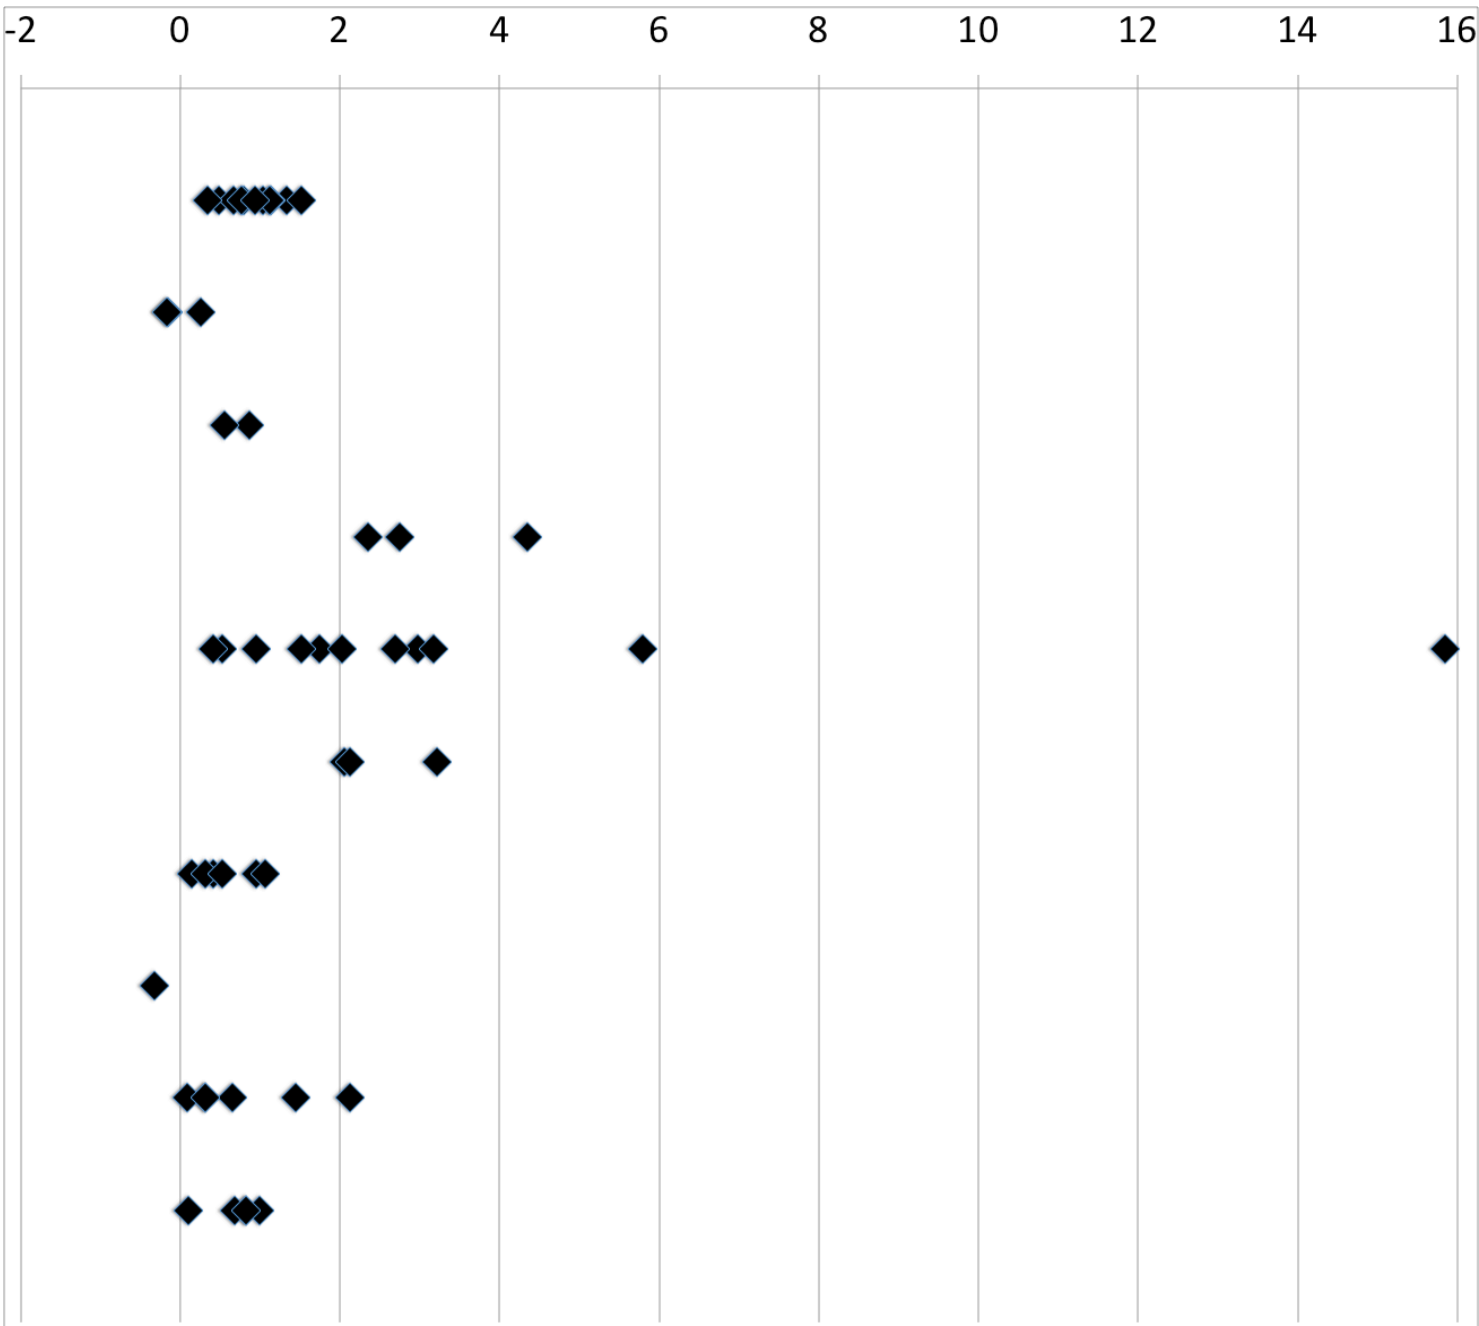



Supplementary  
Figure 6 B

pMAPKAPK2 Medians (CD34+CD38low)

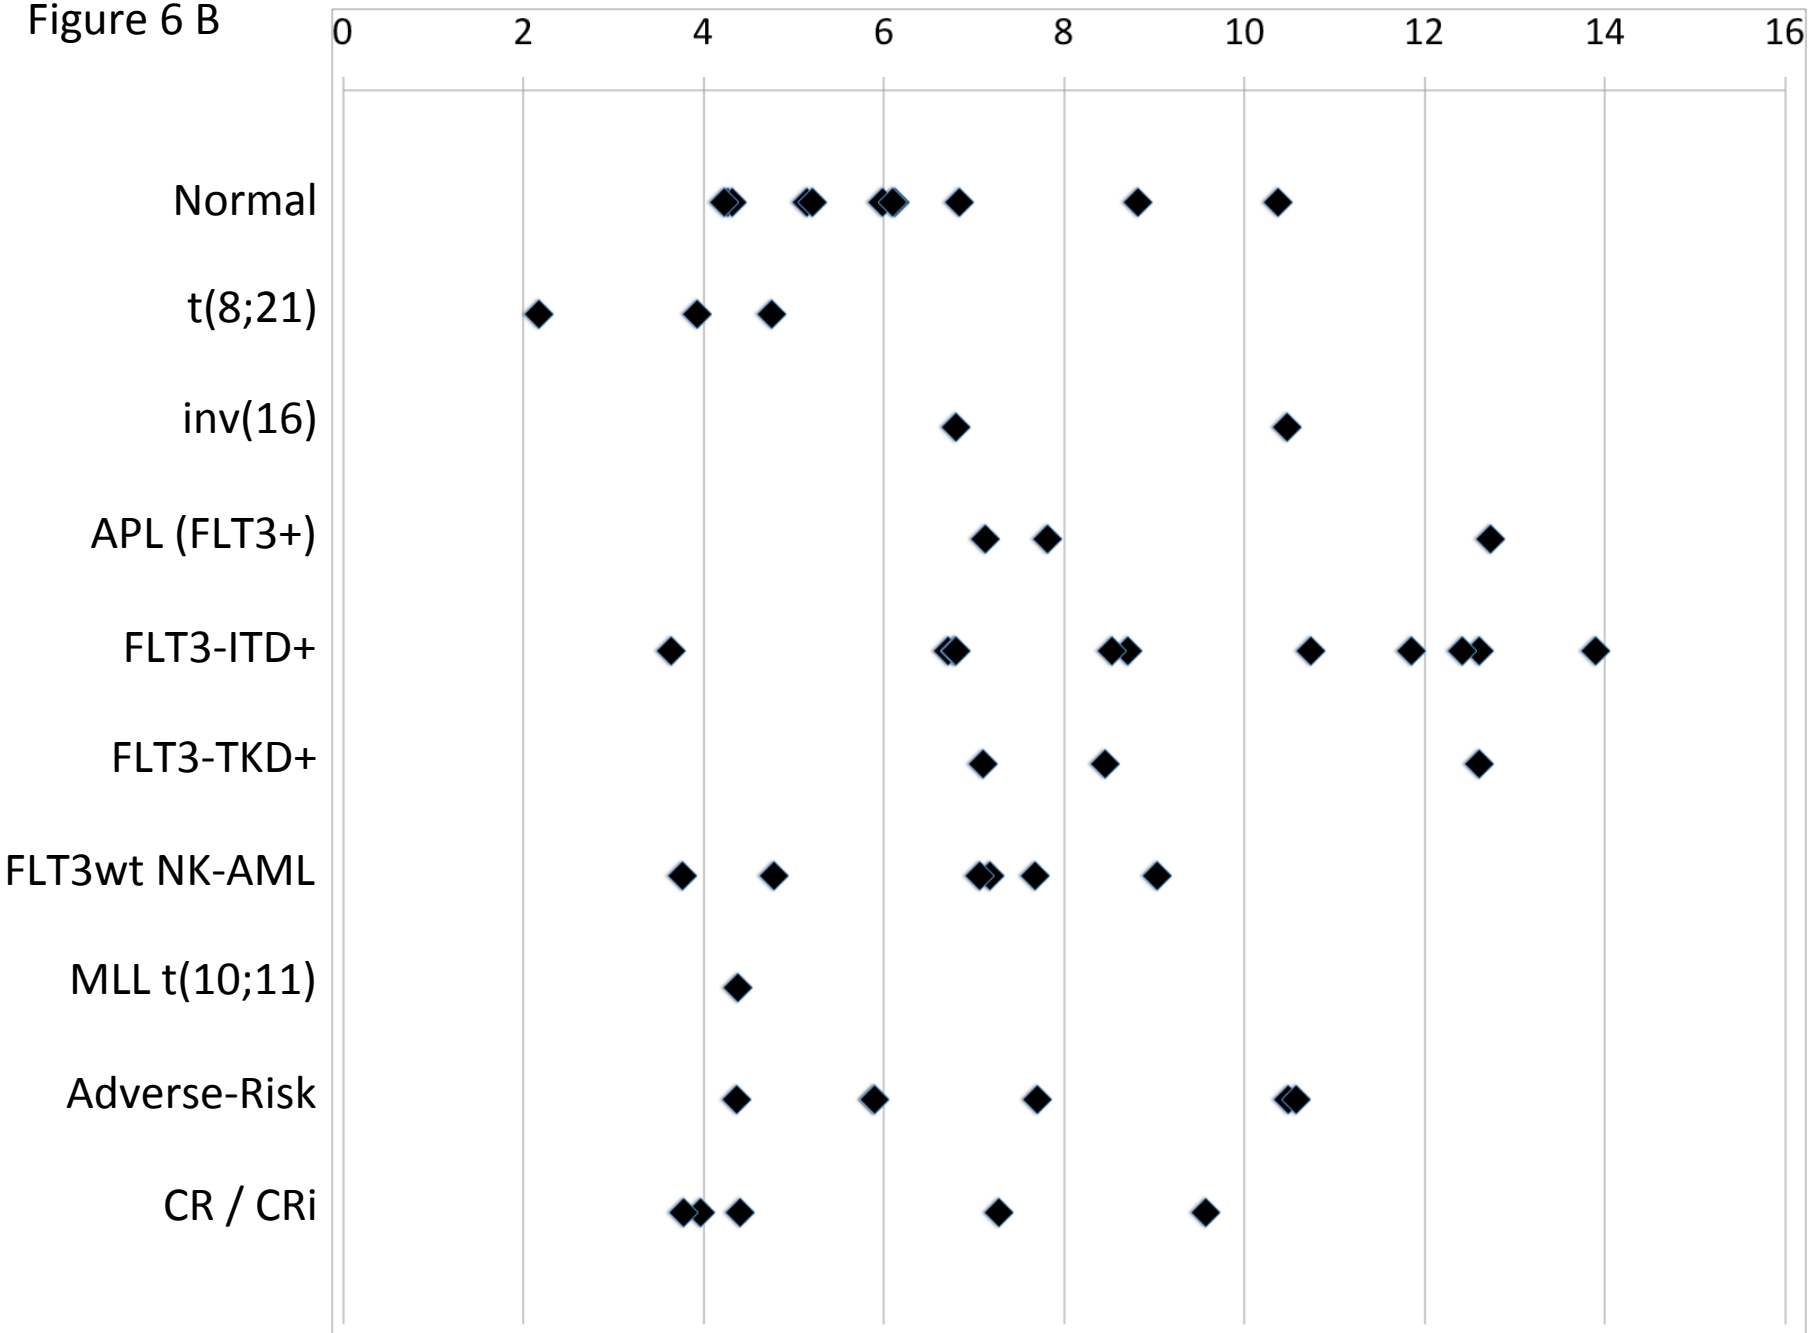

Supplementary  
Figure 6 C

pERK Medians (CD34+CD38low)

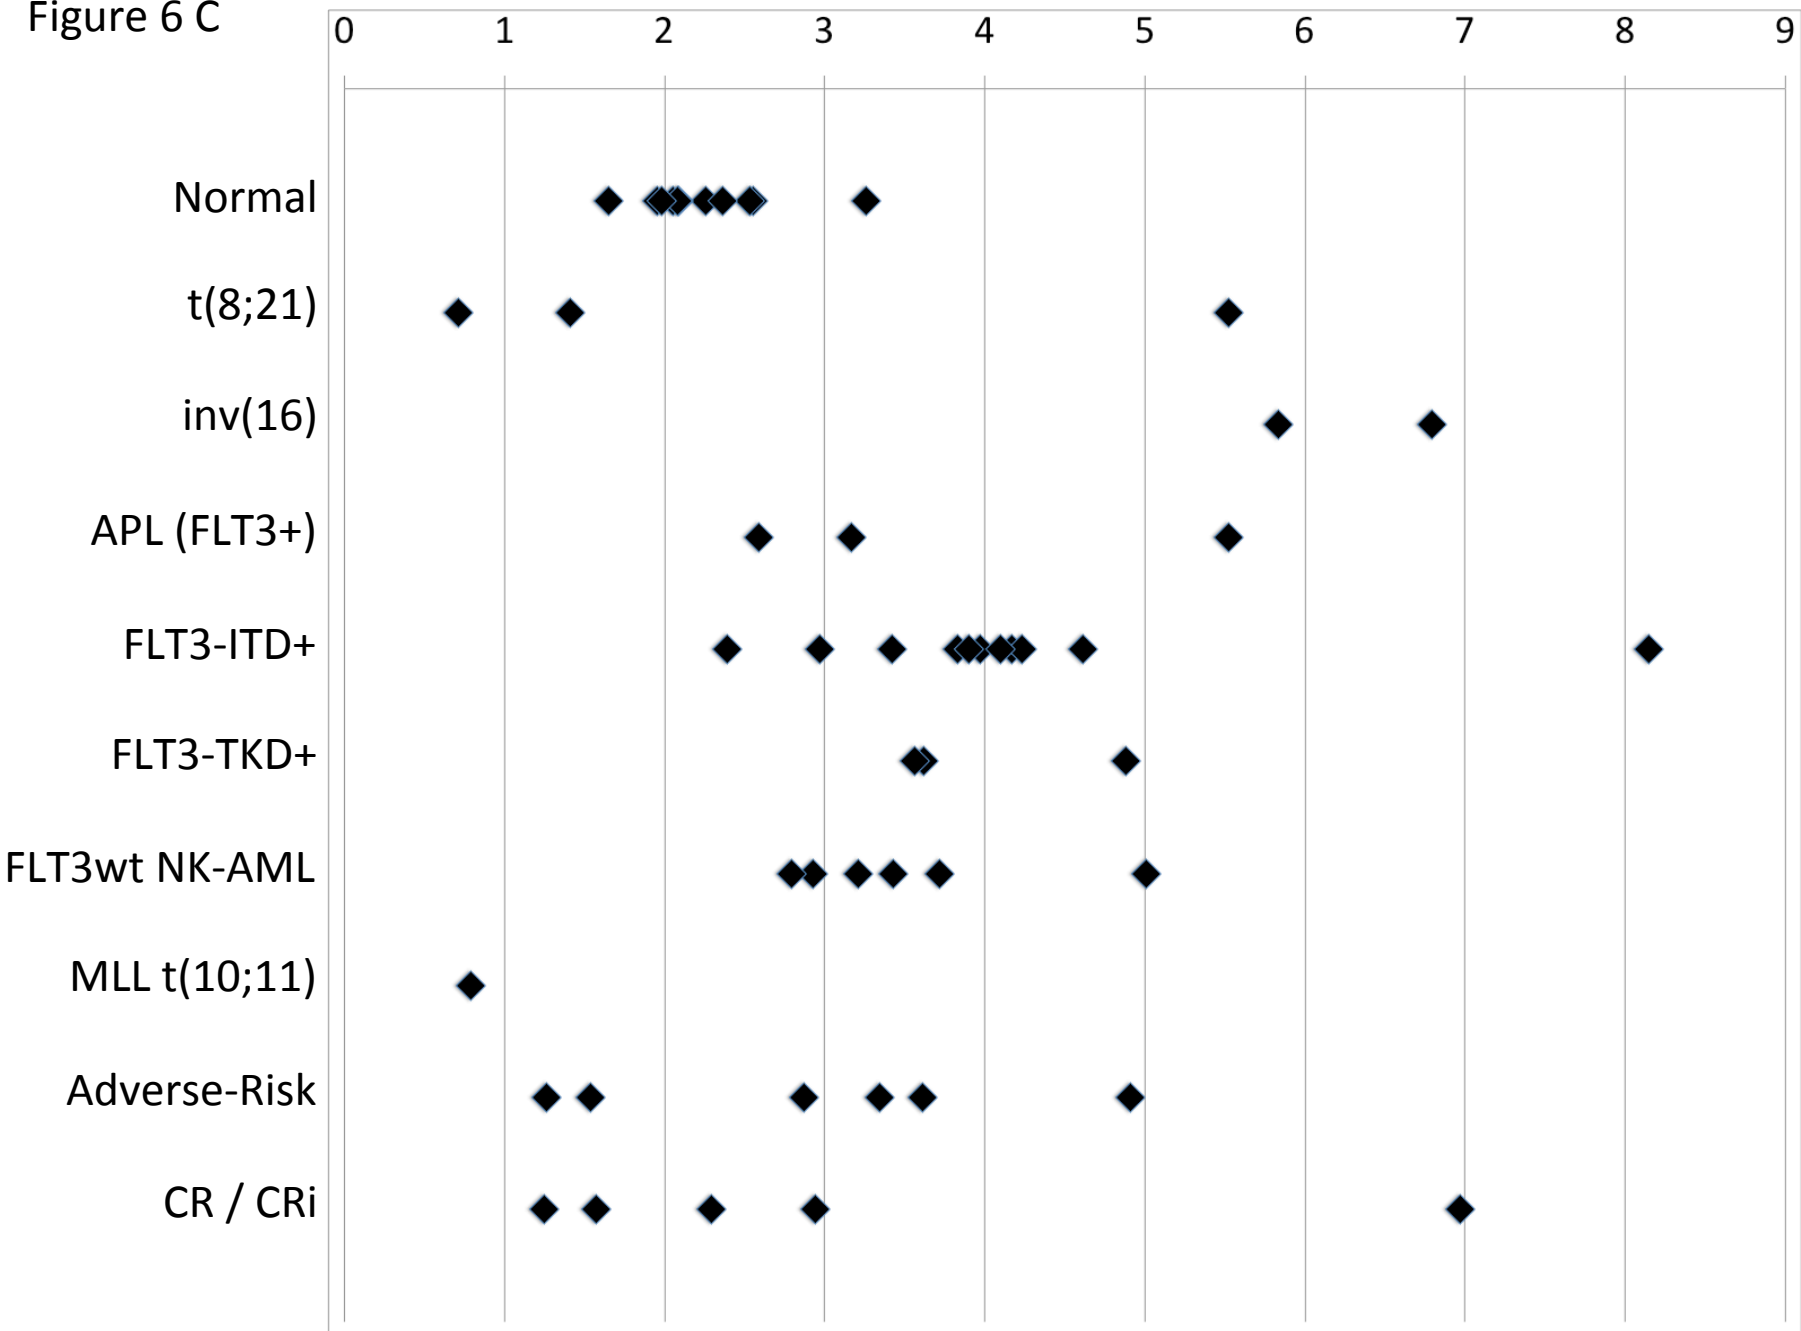

Supplementary  
Figure 6 D

p4E-BP1 Medians (CD34+CD38low)

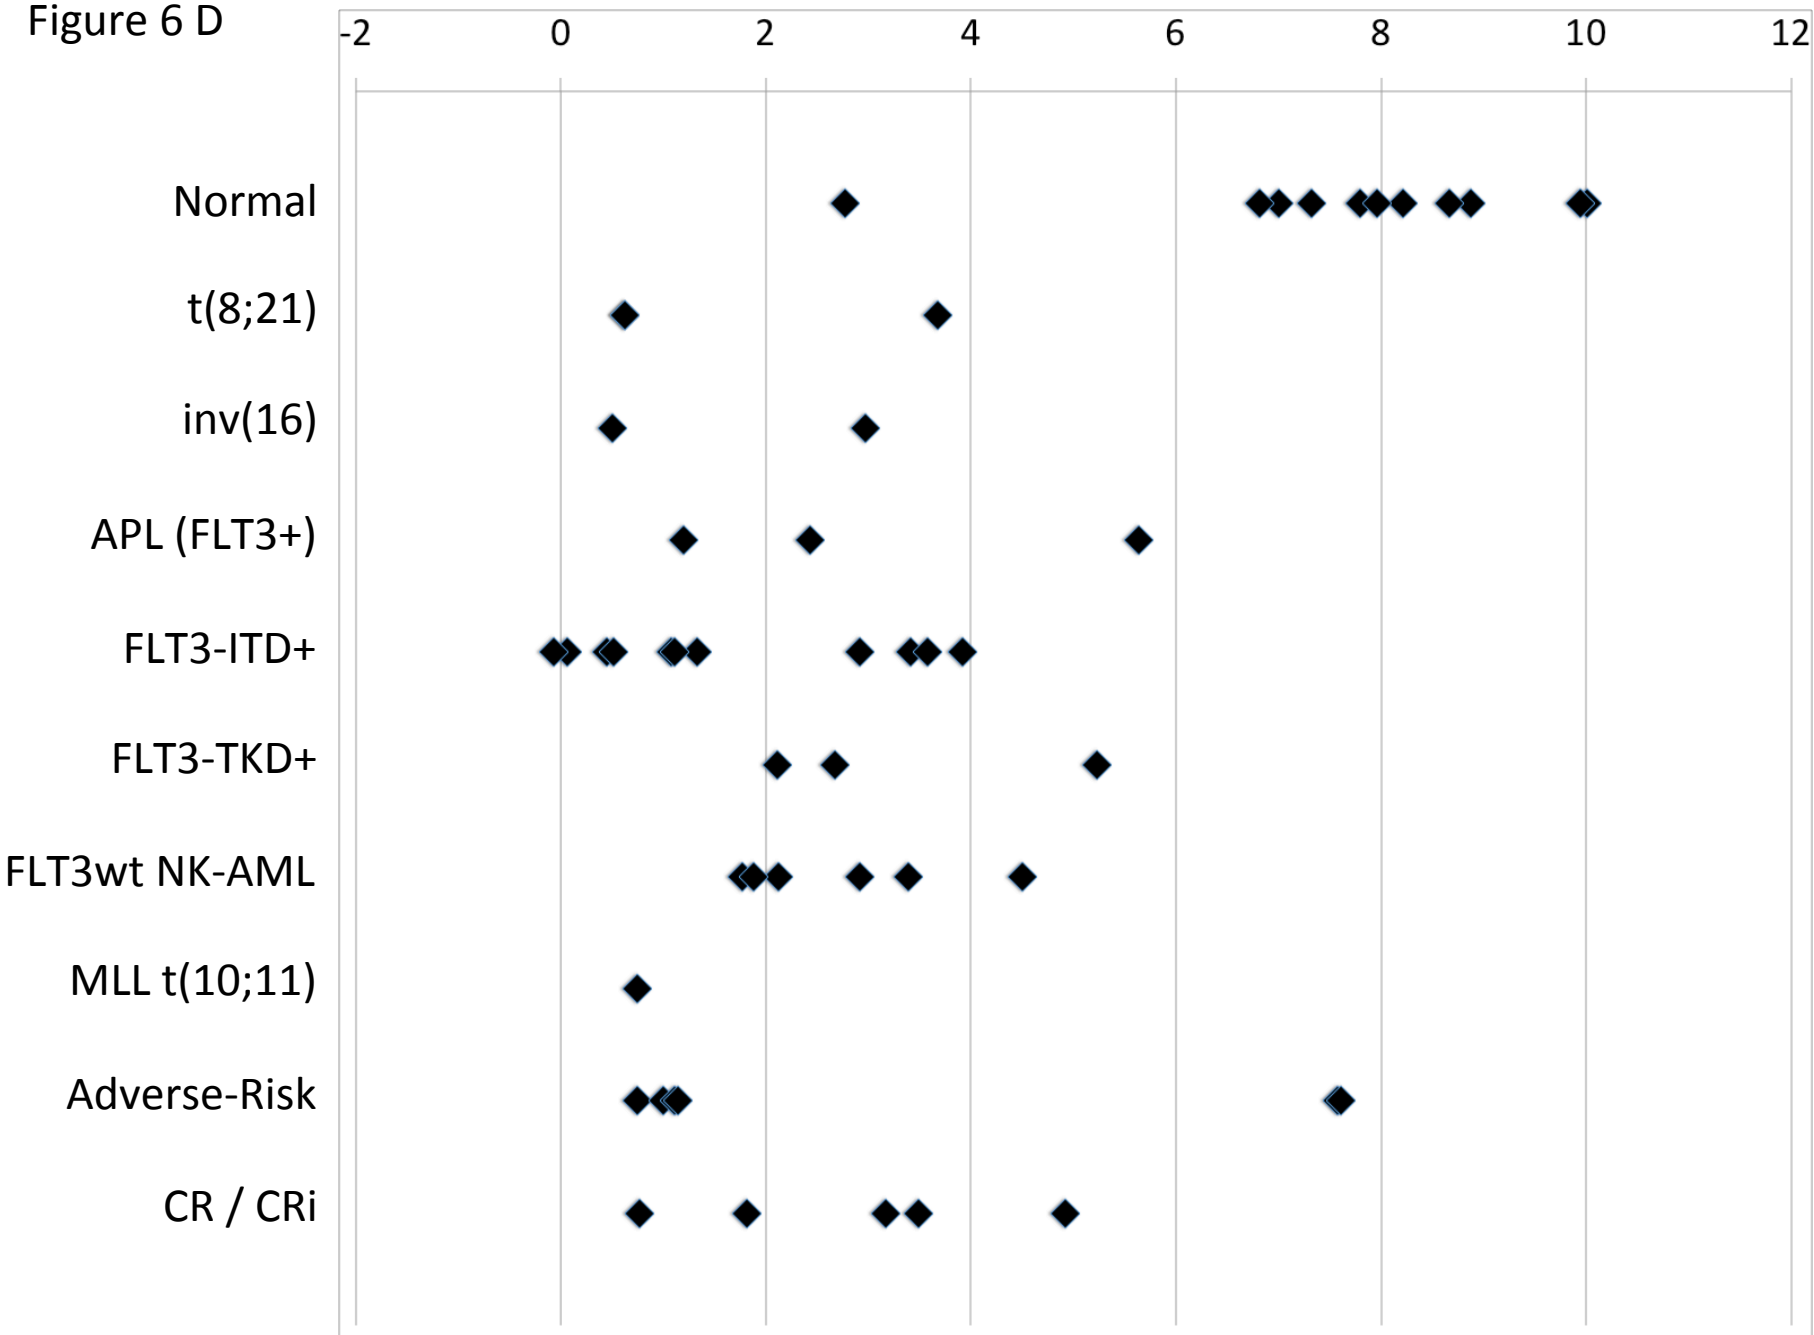

Supplementary  
Figure 6 E

pRP-S6 Medians (CD34+CD38low)

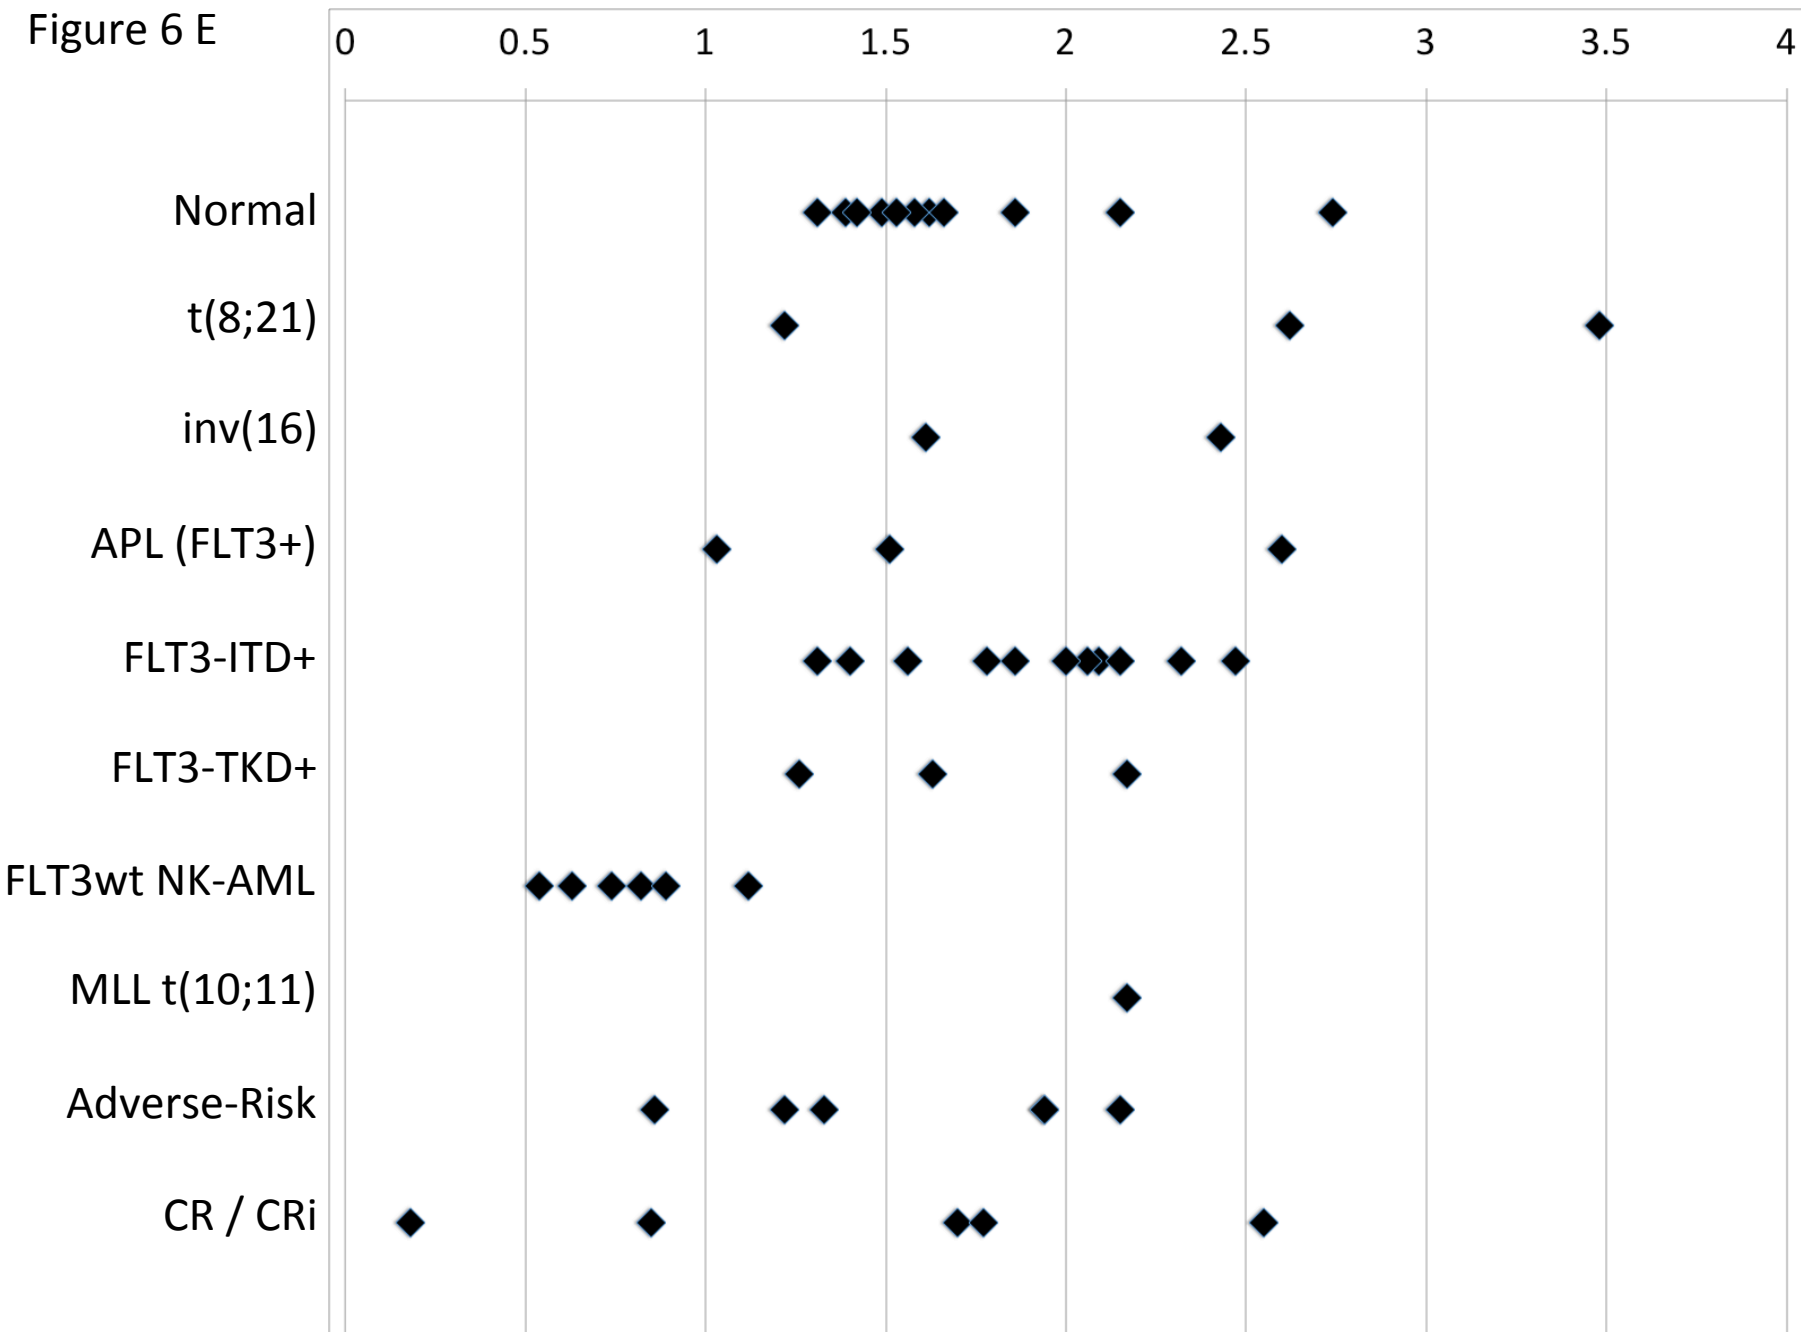

Supplementary  
Figure 6 F

pAKT Medians (CD34+CD38low)

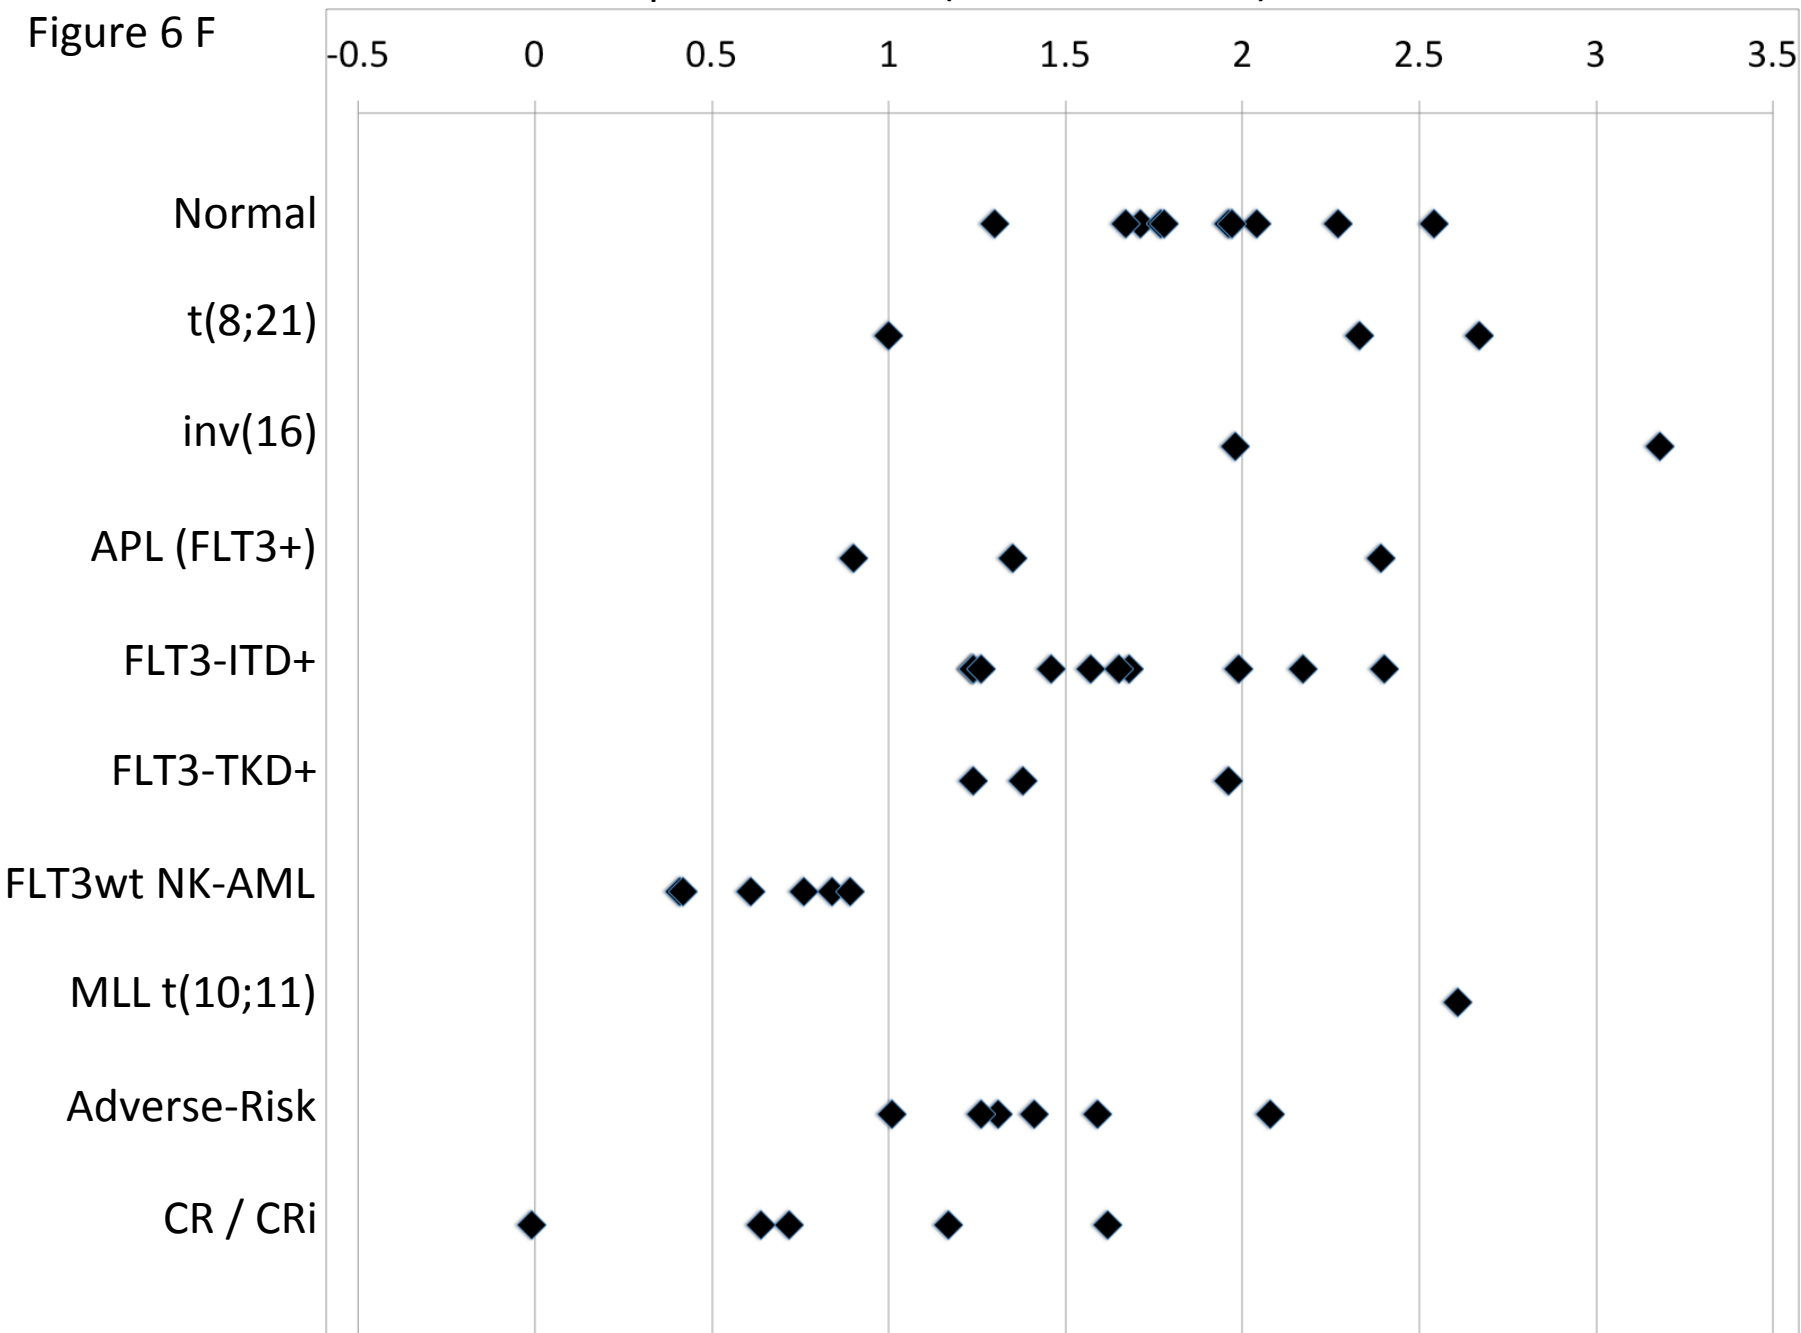

Supplementary  
Figure 6 G

H3K9ac Medians (CD34+CD38low)

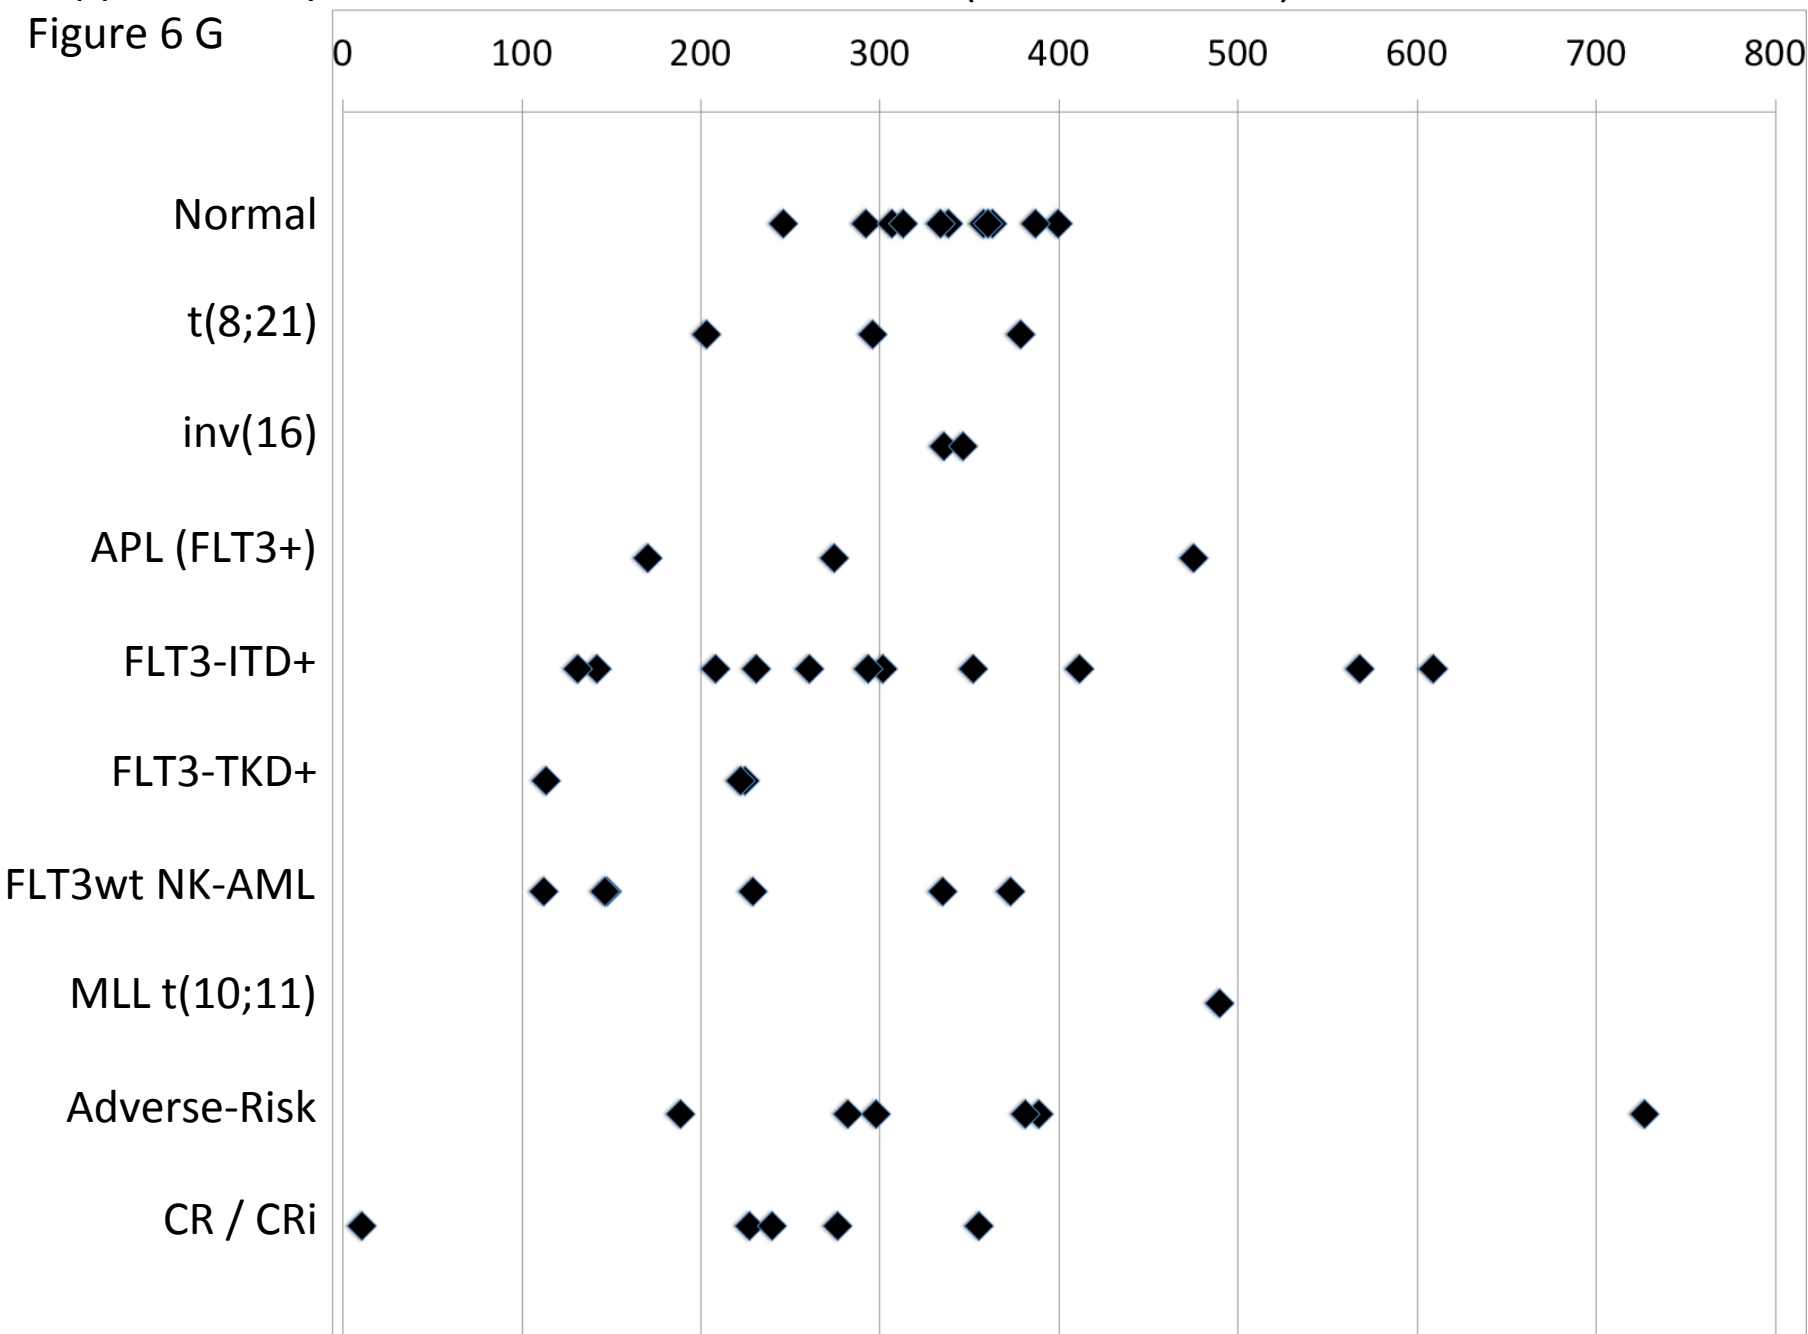

Supplementary  
Figure 6 H

pATM Medians (CD34+CD38low)

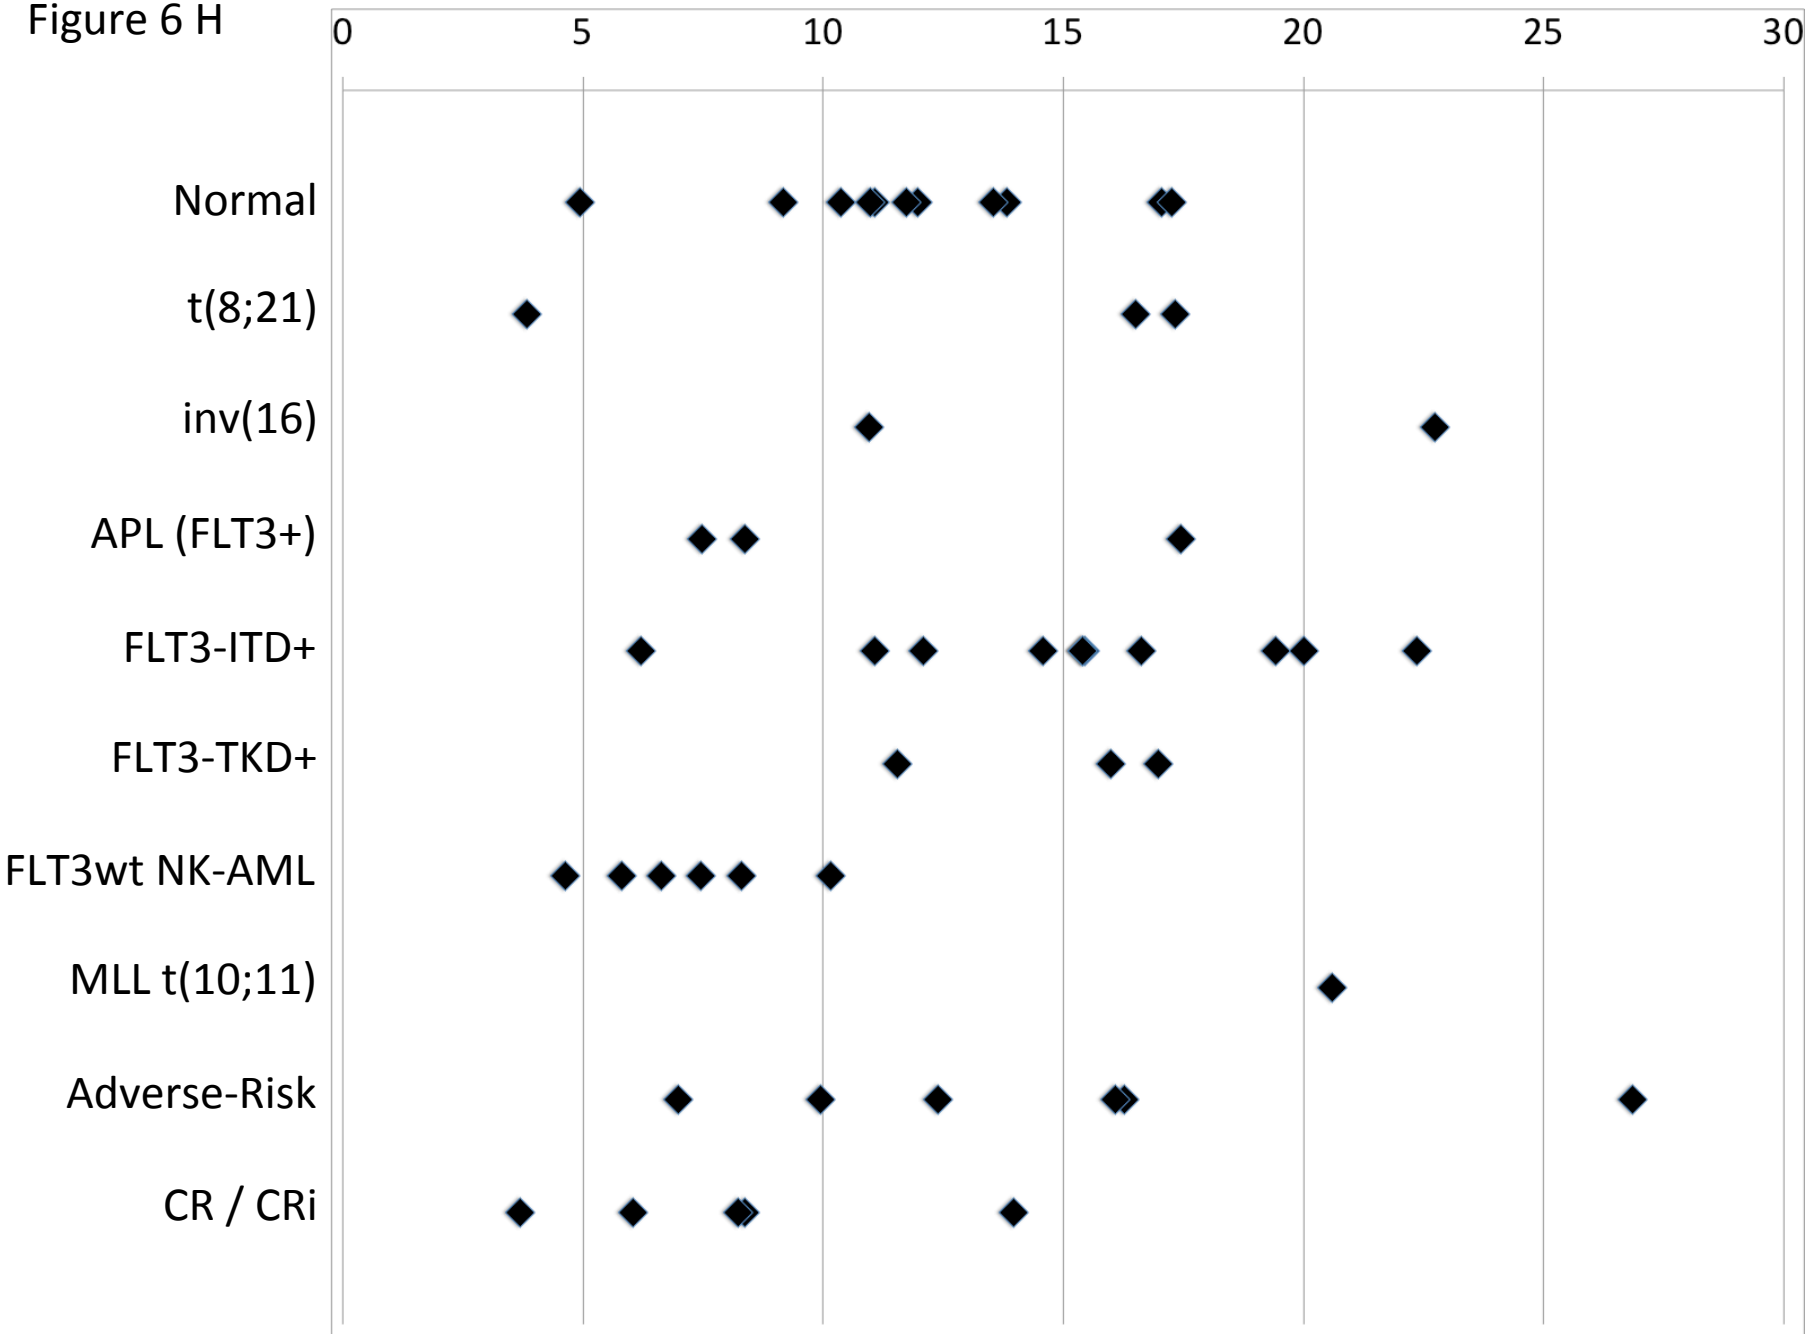

Supplementary  
Figure 6 I

pCREB Medians (CD34+CD38low)

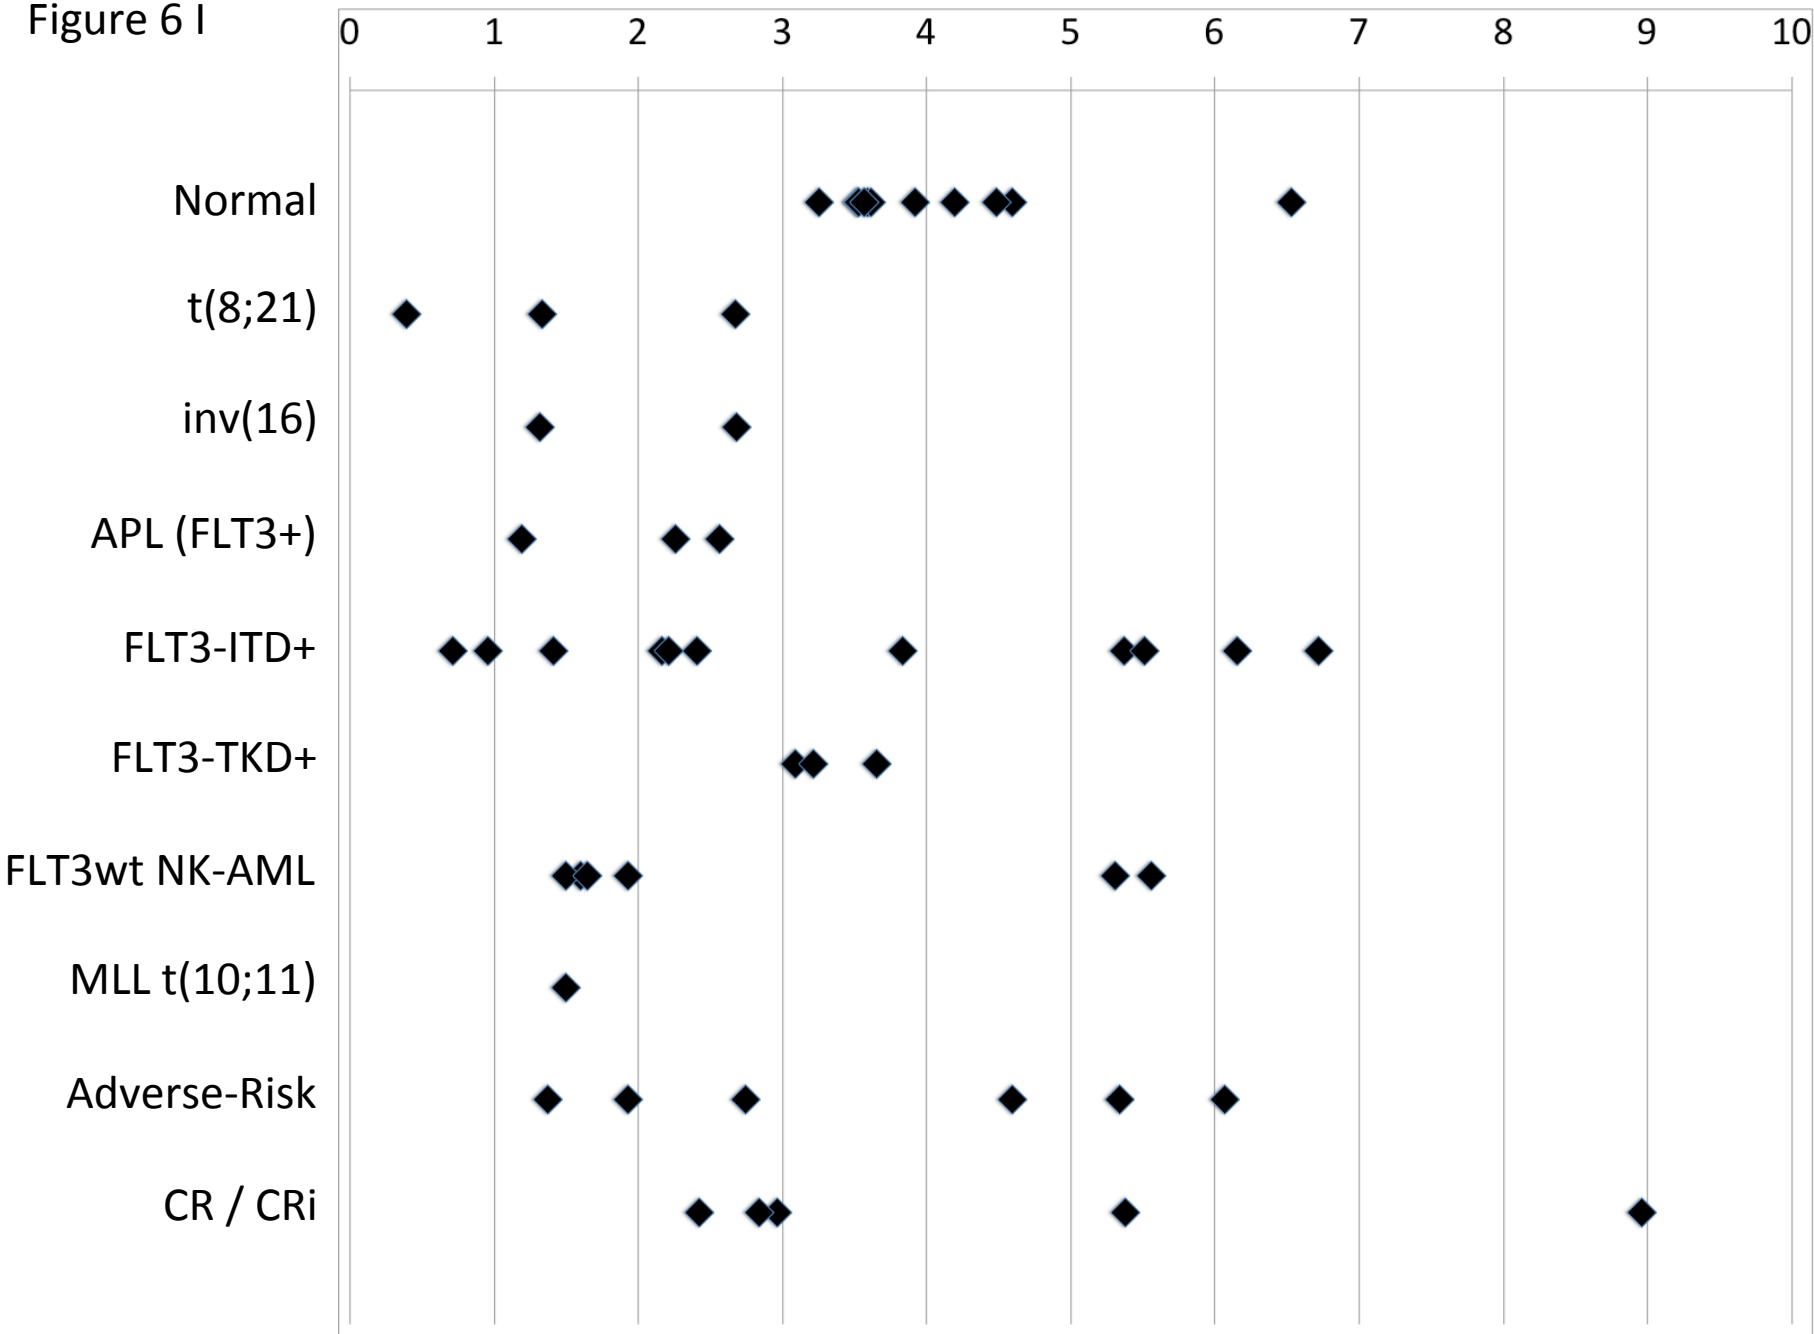



**Supplementary Figure 6:** Median basal intracellular signaling of CD34<sup>+</sup>CD38<sup>low</sup> cells from AML samples of each subtype. Median expression level of the indicated markers in the total CD34<sup>+</sup>CD38<sup>low</sup> population, each data point represents the median expression level of one patient sample or one of the 14 sample aliquots from the five healthy donors. Each phospho-epitope is indicated.

Median cPARP

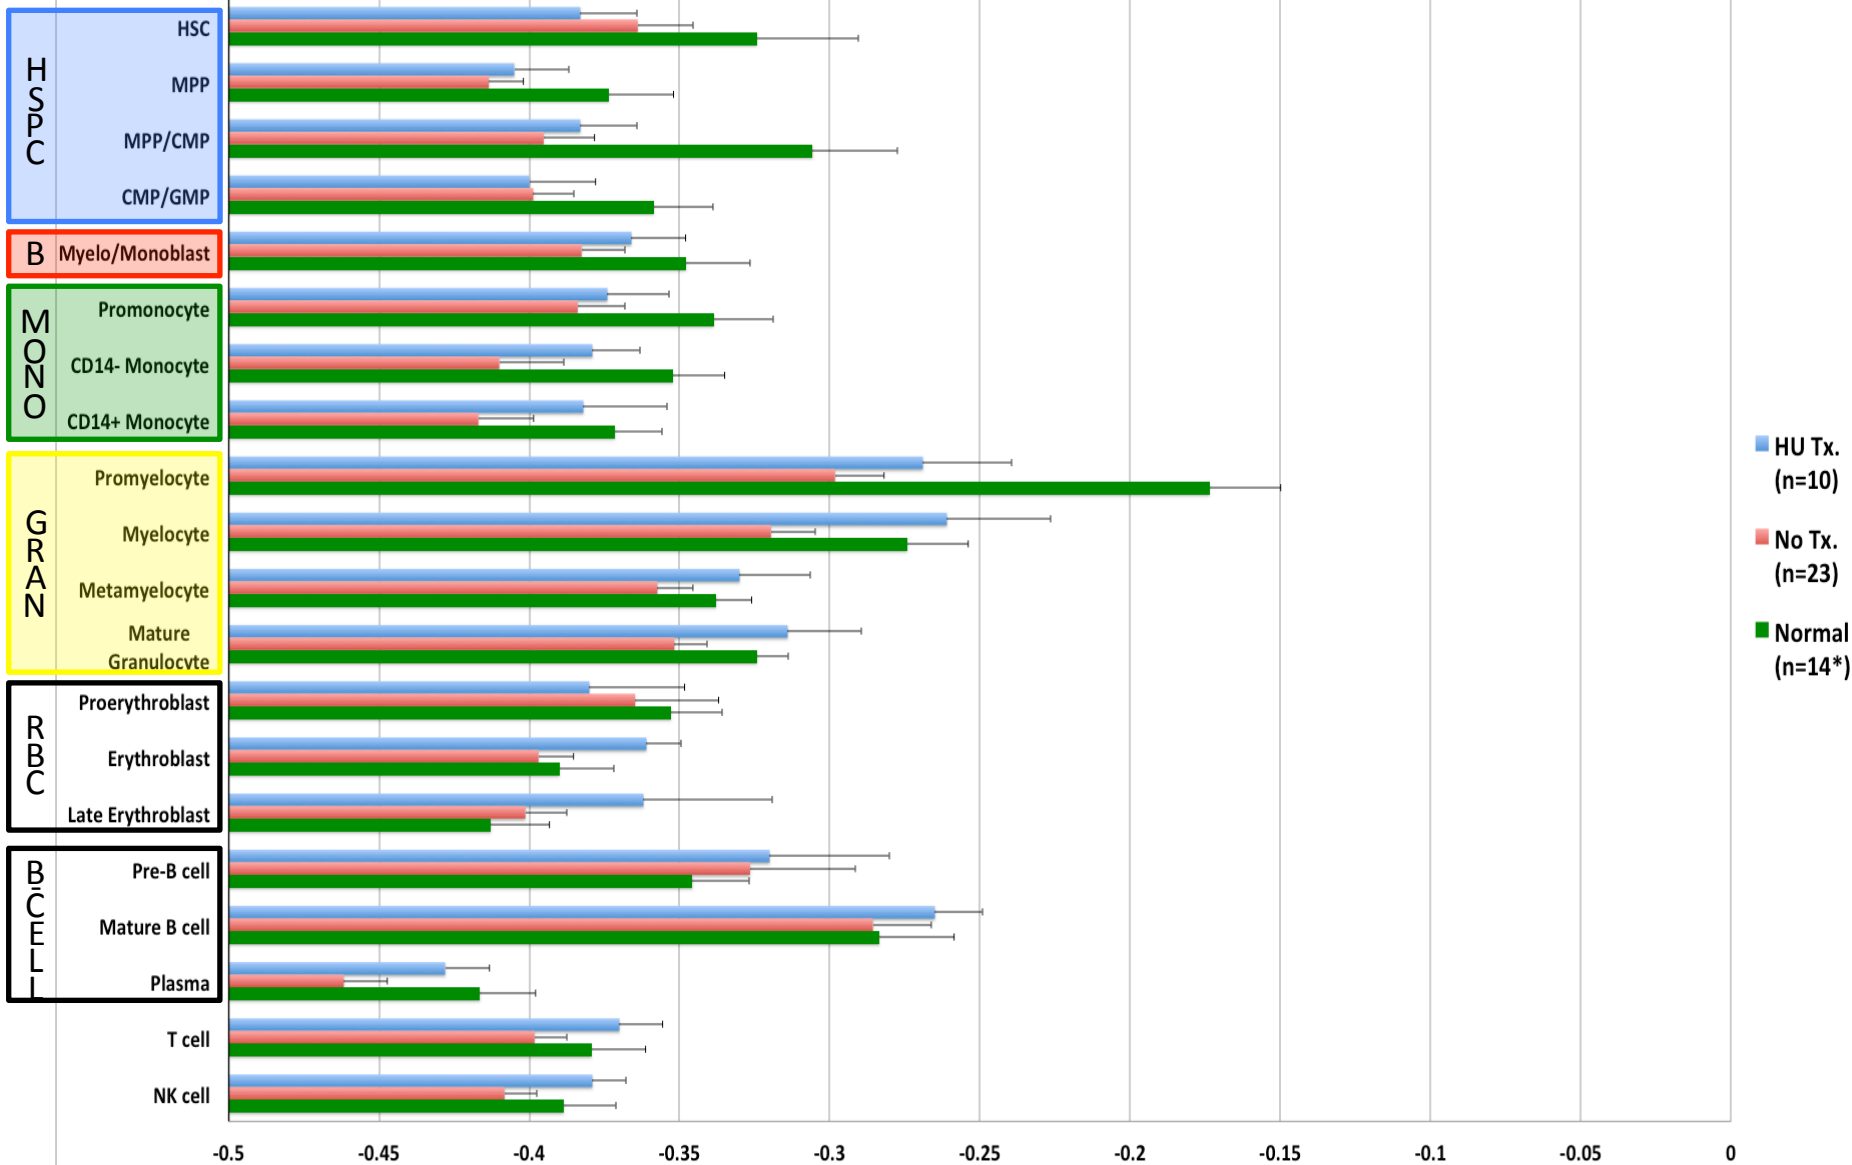

**Supplementary Figure 7:** HU treatment does not increase the fraction of apoptotic cells measured by cPARP levels. Negative values reflect the very low cPARP signal that is further reduced by noise subtraction. Colored boxes group immunophenotypic populations. HSPC, hematopoietic stem and progenitor cells; B, blasts (immunophenotypic); Mono, monocyte lineage cells; Gran, granulocyte lineage; RBC, red blood cell lineage; B-Cell, B cell lineage. Error bars indicate standard errors.

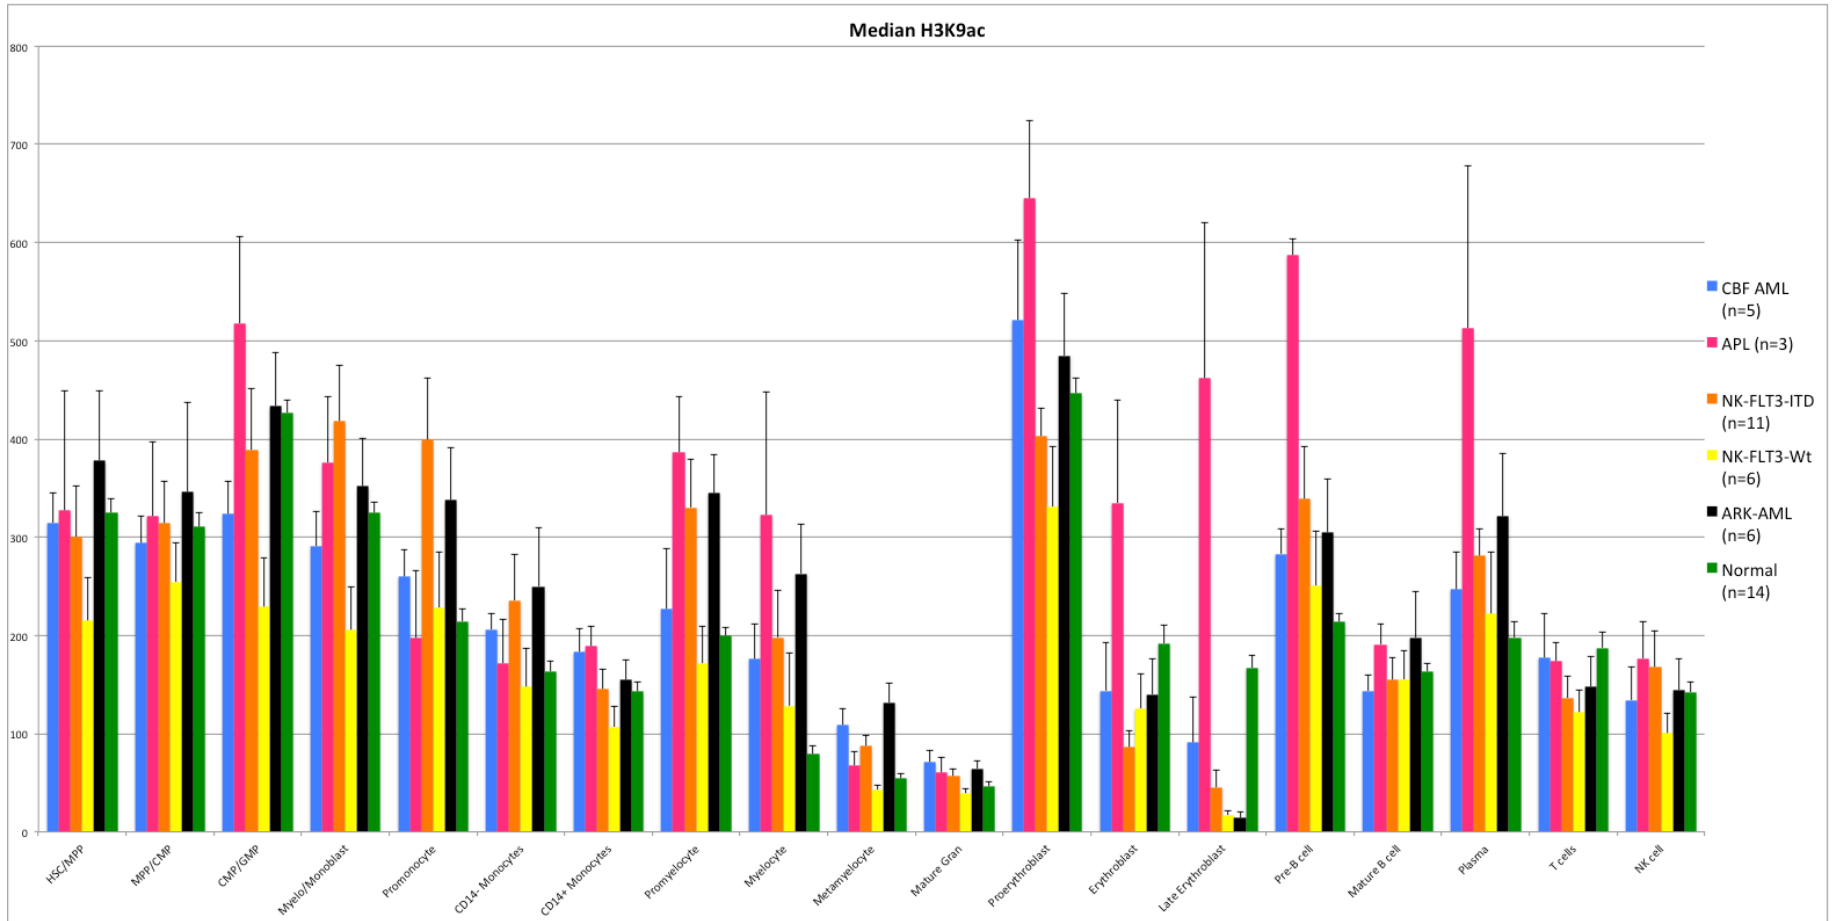

**Supplementary Figure 8:** Histone 3 lysine 9 acetylation decreases with immunophenotypic differentiation in both normal and AML patient samples. Median antibody staining for H3K9ac in cells of the indicated (manually-gated) populations. Error bars indicate standard errors.
