# Supplementary material
Source: PubMed Central journal article supplement (PMC4652947)
Supplement: NIHMS702883-supplement-5.pdf [file NIHMS702883-supplement-5.pdf]

**Supplementary Table 1:** Clinical characteristics of AML patients tested in this study. Blue boxes indicate patients for whom extended mutational testing was performed. Pink boxes denote patients with relapsed or refractory disease. Purple boxes indicate patients who achieved CR after biopsy. Orange boxes indicate patients who were not treated or died during treatment. Green boxes denote patients alive at last follow-up. Yellow boxes indicate patients who were receiving hydroxyurea at the time of biopsy.

| Patient                                | Sex | Age | Cytogenetics         | Mutations                                                     | Status at Biopsy | CR         | Treatment      | Survival (d) | Blast % | HU  |
|----------------------------------------|-----|-----|----------------------|---------------------------------------------------------------|------------------|------------|----------------|--------------|---------|-----|
| <b>Core Binding Factor AML</b>         |     |     |                      |                                                               |                  |            |                |              |         |     |
| AML5                                   | F   | 44  | t(8;21)              | None                                                          | New Dx.          | Yes        | 4+3            | 619          | 75%     | No  |
| AML26                                  | F   | 45  | t(8;21)              | NRAS <sup>+</sup>                                             | New Dx.          | Yes        | Vorinostat+3+4 | Alive        | 15%     | No  |
| AML35                                  | M   | 58  | t(8;21)              | Kit N822K <sup>+</sup>                                        | New Dx.          | Yes        | 7+3 (90)       | Alive        | 57%     | No  |
| AML10                                  | M   | 37  | Inv(16)              | None                                                          | New Dx.          | Yes        | 7+3 (90)       | Alive        | 76%     | Yes |
| AML32                                  | F   | 60  | t(16;16),+22         | FLT3-TKD <sup>+</sup>                                         | Relapsed         | unknown    | Aza + GO       | unknown      | 82%     | No  |
| <b>Acute Promyelocytic Leukemia</b>    |     |     |                      |                                                               |                  |            |                |              |         |     |
| APL1                                   | M   | 64  | t(15;17)             | FLT3-ITD <sup>+</sup>                                         | New Dx.          | Yes        | Ida + ATRA     | unknown      | 96%     | Yes |
| APL3                                   | M   | 18  | t(15;17)             | FLT3-ITD <sup>+</sup>                                         | New Dx.          | Yes        | Arsenic + ATRA | Alive        | 21%     | No  |
| APL4                                   | M   | 55  | t(15;17)             | PML-RAR <sup>+</sup> , FLT3-ITD <sup>+</sup> ,                | New Dx.          | Yes        | Arsenic + ATRA | Alive        | 93%     | No  |
| APL5                                   | M   | 48  | t(15;17)             | PML-RAR <sup>+</sup> , FLT3-ITD <sup>+</sup>                  | New Dx.          | N/A        | ATRA + Dauno   | 2            | 94%     | Yes |
| <b>Normal Karyotype AML, FLT3-TKD+</b> |     |     |                      |                                                               |                  |            |                |              |         |     |
| AML6                                   | M   | 66  | Failed; Later Normal | FLT3 TKD <sup>+</sup>                                         | New Dx.          | Refractory | 7+3 x2         | 142          | 76%     | Yes |
| AML8                                   | M   | 66  | Normal               | FLT3 TKD <sup>+</sup>                                         | Refractory       | Refractory | Decitabine     | 107          | 34%     | No  |
| AML31                                  | F   | 37  | Normal               | NPM1 <sup>+</sup> , FLT3-TKD <sup>+</sup> , IDH1 <sup>+</sup> | Relapse          | No         | MEC            | 227          | 92%     | Yes |
| <b>Normal Karyotype AML, FLT3-ITD+</b> |     |     |                      |                                                               |                  |            |                |              |         |     |
| AML7                                   | F   | 72  | Normal               | FLT3-ITD <sup>+</sup>                                         | New Dx.          | N/A        | No Tx.         | 32           | 78%     | No  |
| AML9                                   | F   | 26  | Normal               | FLT3-ITD <sup>+</sup> , NPM1 <sup>+</sup>                     | New Dx.          | Yes        | 7+3 x2         | 533          | 21%     | No  |
| AML20                                  | M   | 29  | Normal               | FLT3-ITD <sup>+</sup> , BiCEBPa <sup>+</sup>                  | New Dx.          | Yes        | G-CLAC         | 229          | 90%     | Yes |
| AML21                                  | F   | 27  | Normal               | FLT3-ITD <sup>+</sup> , NPM1 <sup>+</sup>                     | Relapsed         | No         | G-CLAC x 2     | 173          | 76%     | No  |
| AML23                                  | F   | 62  | Normal               | DNMT3a <sup>+</sup> , FLT3-ITD <sup>+</sup> ,                 | New Dx.          | N/A        | No Tx.         | 11           | 92%     | No  |

|                                      |   |    |                            |                                                                 |             |            |                          |             |           |     |
|--------------------------------------|---|----|----------------------------|-----------------------------------------------------------------|-------------|------------|--------------------------|-------------|-----------|-----|
|                                      |   |    |                            | sCEBPa <sup>+</sup>                                             |             |            |                          |             |           |     |
| AML27                                | M | 53 | Normal                     | NPM1 <sup>+</sup> , FLT3-ITD <sup>+</sup>                       | New Dx.     | Yes        | 7+3 (90)                 | Alive (BMT) | 96%       | Yes |
| AML30                                | F | 67 | Normal                     | NPM1 <sup>+</sup> , FLT3-ITD <sup>+</sup> , DNMT3a <sup>+</sup> | New Dx.     | Yes        | Decitabine + midostaurin | 357         | 89%       | Yes |
| AML37                                | M | 71 | Normal                     | NPM1 <sup>+</sup> , FLT3-ITD <sup>+</sup> , DNMT3a <sup>+</sup> | New Dx.     | N/A        | No Tx.                   | 2           | 84%       | Yes |
| AML38                                | M | 33 | Normal                     | FLT3-ITD <sup>+</sup> , NRAS <sup>+</sup>                       | New Dx.     | PR         | 4+3                      | 230         | 39%       | No  |
| AML 39                               | M | 59 | Normal                     | DNMT3a <sup>+</sup> , FLT3-ITD <sup>+</sup>                     | New Dx.     | PR         | 7+3, 5+2 (90)            | Alive (BMT) | 69%       | Yes |
| AML 40                               | M | 58 | Normal                     | FLT3-ITD <sup>+</sup> , NPM1 <sup>+</sup> , sCEBPa <sup>+</sup> | Residual    | PR         | GCLAC                    | 267         | 49% / 68% | No  |
| <b>Normal Karyotype AML, wt FLT3</b> |   |    |                            |                                                                 |             |            |                          |             |           |     |
| AML13                                | M | 50 | Normal                     | None                                                            | Relapsed    | Refractory | Aza + GO                 | 74          | 27%       | No  |
| AML14                                | F | 55 | Normal                     | None                                                            | Relapsed    | Refractory | Aza + GO                 | 65          | 43%       | No  |
| AML15                                | M | 72 | Normal                     | BiCEBPa <sup>+</sup>                                            | Refractory  | Refractory | NEDD-8 inhib.            | 181         | 24%       | No  |
| AML42 (RAEB-2)                       | M | 80 | Normal                     | None                                                            | Progression | PR         | Decitabine               | 390         | 16% / 11% | No  |
| AML36 (RAEB-2)                       | M | 68 | Normal                     | None                                                            | Residual    | N/A        | No Tx.                   | 207         | 9%/13 %   | No  |
| AML33                                | M | 32 | normal                     | BiCEBPa <sup>+</sup>                                            | Relapse     | Yes        | MEC                      | Alive       | 28%       | No  |
| <b>Adverse-Risk Karyotype</b>        |   |    |                            |                                                                 |             |            |                          |             |           |     |
| AML4                                 | M | 66 | Monosomal                  | None                                                            | New Dx.     | No         | Aza-Rev                  | 6           | 43%       | No  |
| AML18                                | F | 30 | Inv(1), t(11;15)           | FLT3-ITD <sup>+</sup> , sCEBPa <sup>+</sup>                     | Relapsed    | PR         | MEC x 2                  | unknown     | 81%       | No  |
| AML19                                | F | 76 | Monosomy 7                 | None                                                            | Relapsed    | No         | Temozolomide             | 22          | 82%       | Yes |
| AML22                                | F | 42 | t(10;11) [MLL]             | Kit(D816V) <sup>+</sup> , KRAS(G12V) <sup>+</sup>               | New Dx.     | No         | 7+3 x 2                  | 257         | 95%       | No  |
| AML25                                | F | 67 | Monosomy 7                 | JAK2(V617F) <sup>+</sup>                                        | New Dx.     | N/A        | No Tx.                   | 98          | 28%       | No  |
| AML29                                | M | 57 | Hyperdiploid, Complex, 5q- | DNMT3a <sup>+</sup>                                             | New Dx.     | Yes        | Vorinostat +3+4          | 412         | 90%       | No  |
| AML41                                | F | 62 | t(1;3)                     | NRAS <sup>+</sup> , SF3b1 <sup>+</sup>                          | Residual    | PR         | 7+3 + Panobinostat       | unknown     | 13% / 8%  | No  |

| Complete Response (CR) / Complete Response with in complete count recovery (CRi) |   |    |         |                                                           |             |     |     |       |       |    |
|----------------------------------------------------------------------------------|---|----|---------|-----------------------------------------------------------|-------------|-----|-----|-------|-------|----|
| CR2                                                                              | F | 48 | Normal  | IDH2 <sup>+</sup>                                         | CR s/p 7+3  | N/A | N/A | Alive | 1%    | No |
| CR3                                                                              | F | 53 | Normal  | NPM1 <sup>+</sup> , FLT3 <sup>+</sup> , IDH1 <sup>+</sup> | CR s/p 4+3  | N/A | N/A | 269   | 2%/1% | No |
| CR5                                                                              | M | 49 | Normal  | None                                                      | CRi s/p 7+3 | N/A | N/A | 185   | 2%    | No |
| CR6                                                                              | F | 81 | Normal  | None                                                      | CRi         | N/A | N/A | 327   | 4%    | No |
| CR7                                                                              | F | 80 | del 13q | None                                                      | CRi         | N/A | N/A | 112   | 4%    | No |

Chemotherapy regimens as follows: 4+3, high dose cytarabine x 4 days plus idarubicin x 3 days; 7+3, standard dose cytarabine x 7 days plus idarubicin x 3 days; 7+3 (90), standard dose cytarabine x 7 days plus high-dose daunorubicin x 3days; 5+2, standard dose cytarabine x 5days plus idarubicin x 2 days; Aza + GO, azacitidine plus gemtuzumab; Arsenic + ATRA, arsenic trioxide plus all-trans retinoic acid; ATRA + Dauno, all-trans retinoic acid plus daunorubicin; MEC, mitoxantrone, etoposide and intermediate-dose cytarabine; G-CLAC, fligrastrim, clofarabine and high-dose cytarabine; Ida + ATRA, idarubicin plus all-trans retinoic acid. Note: Samples AML6 and AML8 came from the same patient, all others samples were from separate patients. Samples in italics were not analyzed for in all experiments (APL1 was collected 3 hours after biopsy and could not be analyzed for cell cycle or signaling; AML33 was collected fresh, but IdU was not added so this sample could not be analyzed for cell cycle).

**Supplementary Table 2:** Antibodies used in this study. The staining panel (A, B, or both) is indicated for each. The “Analyses” column indicates whether the marker was used for each dimensionality reduction analysis (S, SPADE analysis; V, viSNE analysis; B, multidimensional binning). Coefficients of variation (CV) were calculated based on the average of gated cell populations with expression of the marker. CVs could not be calculated for two of the markers (“N/A”); cleaved PARP-positive cells were too rare to allow accurate estimation of the CV, and pSMAD1/5 did not have sufficiently bright staining to perform any analyses.

| Antigen             | Conjugate         | Clone     | Concentration   | Manufacturer   | Panel                     | CV             | Analyses |
|---------------------|-------------------|-----------|-----------------|----------------|---------------------------|----------------|----------|
| CD3                 | In-113            | UCHT1     | 2 µg/mL         | Biologend      | A & B                     | 11.7%          | S, V, B  |
| CD45                | In-115            | HI30      | 2 µg/mL         | Biologend      | A & B                     | 14.1%          | S, V, B  |
| CD45RA              | La-139            | HI100     | 1.5 µg/mL       | Biologend      | A                         | 14.2%          |          |
| p-RPS6<br>(S235/36) | La-139,<br>Yb-175 | N7-548    | 1 µg/mL         | BD Biosciences | B (La-139),<br>A (Yb-175) | 20.2%<br>14.3% |          |
| CD133               | Pr-141            | AC133     | 3 µg/mL         | Milteney       | A                         | 36.5%          |          |
| pATM<br>(S1981)     | Pr-141            | 10H11.E12 | 2 µg/mL         | Millipore      | B                         | 16.7%          |          |
| CD7                 | Nd-142            | M-T701    | 2 µg/mL         | BD Biosciences | A & B                     | 24.1%          | S, V, B  |
| CD71                | Nd-143            | R17217    | 2 µg/mL         | eBiosciences   | A & B                     | 12.4%          | S        |
| CD235               | Nd-144            | HIR2      | 6 µg/mL         | Biologend      | A & B                     | 9.6%           | S, V, B  |
| CD47                | Nd-145            | B6H12     | 1.5 µg/mL       | BD Biosciences | A                         | 12.8%          |          |
| pAkt<br>(S473)      | Nd-145            | D9E       | 2 µg/mL         | CST            | B                         | 11.3%          |          |
| p21                 | Nd-146            | SXM30     | 2 µg/mL         | BD Biosciences | A                         | 13.9%          |          |
| Histone 3<br>(K9ac) | Nd-146            | C511B     | 0.5 µg/mL       | CST            | B                         | 17.8%          |          |
| CD56                | Sm-147            | NCAM16.2  | 1.5 µg/mL       | BD Biosciences | A & B                     | 13.3%          | V, B     |
| CD34                | Nd-148            | 8G12      | 3 µg/mL         | BD Biosciences | A & B                     | 16.4%          | S, V, B  |
| CD90                | Sm-149            | 5E10      | 3 µg/mL         | Biologend      | A                         | 16.4%          |          |
| cMyc                | Sm-149            | D84C12    | 1 µg/mL         | CST            | B                         | 16.2%          |          |
| CD117               | Nd-150            | 104D2     | 1 µg/mL         | Biologend      | A & B                     | 27.2%          | S, V, B  |
| CD123               | Eu-151            | 6H6       | 1 µL per 100 µL | DVS            | A & B                     | 15.7%          | S, V, B  |
| CD33                | Sm-152            | P67.6     | 1.5 µg/mL       | BD Biosciences | A & B                     | 15.1%          | S, V, B  |
| HLA-DR              | Eu-153            | L243      | 2 µg/mL         | Biologend      | A & B                     | 12.3%          | S        |
| Cyclin A            | Sm-154            | BF683     | 2 µg/mL         | BD Biosciences | A                         | 10.4%          |          |
| pMAPKAPK2<br>(T334) | Sm-154            | 27B7      | 2 µg/mL         | CST            | B                         | 21.5%          |          |
| Cyclin B1           | Gd-156            | GNS-1     | 3 µg/mL         | BD Biosciences | A                         | 9.8%           |          |
| pSTAT3<br>(Y705)    | Gd-156            | 4         | 2 µg/mL         | BD Biosciences | B                         | 17.2%          |          |
| PCNA                | Gd-157            | PC10      | 0.5 µg/mL       | BD Biosciences | A                         | 15.9%          |          |
| pSTAT5<br>(Y694)    | Gd-157            | 47        | 2 µg/mL         | BD Biosciences | B                         | 13.9%          |          |
| Ki-67               | Gd-158            | SolA15    | 1 µg/mL         | eBiosciences   | A & B                     | 12.7%          |          |
| CD38                | Tb-159            | HIT2      | 1 µg/mL         | Biologend      | A & B                     | 11.9%          | S, V, B  |
| CD14                | Gd-160            | M5E2      | 2 µg/mL         | Biologend      | A & B                     | 15.4%          | S, V, B  |
| CD16                | Dy-161            | 3G8       | 2 µg/mL         | Biologend      | A & B                     | 13.1%          | S, V, B  |
| CD11b               | Dy-162            | ICRF44    | 2 µg/mL         | Biologend      | A & B                     | 16.1%          | S, V, B  |
| CD15                | Dy-164            | W6D3      | 3 µg/mL         | Biologend      | A & B                     | 15.3%          | S, V, B  |

|                      |        |               |            |                |       |       |         |
|----------------------|--------|---------------|------------|----------------|-------|-------|---------|
| p-pRb (S807/811)     | Ho-165 | J112-906      | 0.75 µg/mL | BD Biosciences | A     | 20.7% |         |
| pNF-kB (p65) (S529)  | Ho-165 | K10-895.12.50 | 2 µg/mL    | BD Biosciences | B     | 16.1% |         |
| CD321                | Er-166 | WK9           | 3 µg/mL    | eBiosciences   | A & B | 13.9% | S, V, B |
| CD99                 | Er-167 | HCD99         | 0.5 µg/mL  | Biologend      | A & B | 24.2% | V, B    |
| CD13                 | Er-168 | L138          | 2 µg/mL    | BD Biosciences | A     | 9.9%  |         |
| pERK 1/2 (T202/Y204) | Er-168 | G2/D13        | 2 µg/mL    | CST            | B     | 10.4% |         |
| cleaved-PARP(D214)   | Yb-171 | F21-852       | 1 µg/mL    | BD Biosciences | A & B | N/A   |         |
| CD10                 | Yb-172 | H110a         | 3 µg/mL    | Biologend      | A & B | 12.5% | S, V, B |
| CD19                 | Yb-173 | H1B19         | 2 µg/mL    | BD Biosciences | A & B | 9.9%  | S, V, B |
| CD20                 | Yb-174 | 2H7           | 2 µg/mL    | Biologend      | A & B | 13.2% | S, V, B |
| pSMAD1/5 (S463/S465) | Yb-175 | 41D10         | 3 µg/mL    | CST            | B     | N/A   |         |
| pHistone H3(S28)     | Yb-176 | HTA28         | 0.5 µg/mL  | Biologend      | A     | 18.5% |         |
| pCREB (S133)         | Yb-176 | 87G3          | 1.5 µg/mL  | CST            | B     | 9.7%  |         |

**Supplementary Table 3:** Comparison of clinical (fluorescent) flow cytometry (on left), to mass cytometry analysis (on right). Green boxes indicate results that were consistent between the techniques, orange boxes indicate results that were inconsistent. Not all results were reported in clinical flow cytometry pathology report and not all results could be compared (uncolored boxes). Patial expression (p) as indicated.

|       | Clinical Fluorescent Flow |       |      |      |          |           |        |          |          | Mass Cytometry |     |      |      |          |           |      |          |          |
|-------|---------------------------|-------|------|------|----------|-----------|--------|----------|----------|----------------|-----|------|------|----------|-----------|------|----------|----------|
|       | CD34                      | CD7   | CD15 | CD56 | CD117    | HLA-DR    | CD33   | CD38     | CD13     | CD34           | CD7 | CD15 | CD56 | CD117    | HLA-DR    | CD33 | CD38     | CD13     |
| AML4  | +                         | +     |      | +(p) | +        | +         | +      | +(p)     | +        | +              | H   | H    | H    | +        | +         | +    | +        | +        |
| AML5  | +                         |       | +    | +(p) | +        | +         | +      | +        | +(p)     | +              | H   | H    | H    | +        | +         | +    | +        | +        |
| AML6  | + partial                 |       |      | +    | +        | +         | +(dim) | +        | +        | +              | H   | H    | H    | +        | +         | +    | +        | +        |
| AML7  | negative                  |       | +    |      | +        | +         | +      | +(p)     | +        | +              |     |      |      | +        | +         | +    | +        | +        |
| AML9  | +                         | +     |      |      | +        | +         | +      | +        | +        | +              | H   | H    |      | +        | +         | +    | +        | +        |
| AML10 | +                         |       | +(p) |      | +        | +         | +      | +        | +        | +              |     | H    |      | +        | +         | +    | +        | +        |
| AML13 | + partial                 |       | +(p) |      | +        | +         | +      | +        | +        | +              |     | H    |      | +        | +         | +    | +        | +        |
| AML14 | +                         | +     |      |      | +        | +         | +      | +        | +        | +              |     | H    |      | +        | +         | +    | dim      | +        |
| AML15 | +                         | +     |      |      | +        | +(p)      | +(p)   | +        | +        | +              | H   | H    |      | +        | +(p)      | +    | +        | +        |
| AML18 | +                         |       |      | +(p) | +        | +         | +      | +        | +        | +              | H   | H    | H    | +        | +         | +    | +        | +        |
| AML19 | +                         | +     |      |      | +        | +         | +      |          | +(dim)   | +              | H   | H    |      | +        | +         | +    | +        | +        |
| AML20 | + partial                 | +     | +(p) |      | +        | +         | +(p)   | +        | +(dim)   | +              | H   | H    |      | +        | +         | +    | +        | +        |
| AML21 | +                         | +     |      |      | +        | +         | +      | +(p)     | +        | +              | H   | H    |      | +        | +         | +    | +        | +        |
| AML22 | +                         |       | +    | +    | negative | +(bright) | +      | +        | +(p;dim) | +              |     | H    | H    | negative | +(bright) | +    | +        | negative |
| AML39 | + partial                 |       | +    |      | +        | +         | +      | +(p)     | +        | +              | H   |      |      | +        | +         | +    | +        | +        |
| AML23 | +                         |       |      |      | +        | +         | +      | +(p;dim) | +        | +              |     | H    |      | +        | +         | +    | +        | +        |
| APL4  | dim partial               |       |      |      | +        | negative  | +      | +        | +        | +              | H   |      |      | +        | negative  | +    | dim      | +        |
| AML25 | +                         |       |      | +(p) |          | +         | +(dim) | +(p)     | +        | +              |     |      |      | +        | +         | +    | +        | +        |
| AML26 | +                         |       | +    | +    | +        | +         | +(dim) | +(p)     | +(dim)   | +              | H   | H    | H    | +        | +         | +    | +        | +(dim)   |
| AML27 | + partial                 | +     | +    |      | +        | +         | +      | +(p)     | +        | +              | H   |      |      | +        | +         | +    | +        | +        |
| AML29 | +                         | +     | +(p) | +    | +        | +         | +      | +(p)     | +        | +              | H   | H    | H    | +        | +         | +    | +        | +        |
| AML30 | + partial                 |       | +    |      | +        | +         | +      | +        | +        | +              |     |      |      | +        | +         | +    | +        | +        |
| AML31 | dim partial               |       | +    |      | +        | +         | +(dim) | +        | +(dim)   | +              |     | H    |      | +        | +         | +    | +        | +        |
| AML32 | +                         |       | +    |      | +        | +         | +(dim) | +        | +        | +              | H   | H    |      | +        | +         | +    | +        | +        |
| AML33 | +                         | +     | +    | +(p) | +        | +         | +      | +        | +        | +              | H   | H    | H    | +        | +         | +    | +        | +        |
| APL5  | + partial                 |       |      | +    | +        | negative  | +      | +(p;dim) | +(p;dim) | +              | H   | H    |      | +        | negative  | +    | +        | +        |
| AML35 | +                         |       | +(p) | +(p) | +        | +         | +(dim) | +        | +        | +              | H   | H    | H    | +        | +         | +    | +        | +(dim)   |
| AML36 | +                         |       | +(p) |      | +        | +         | +(p)   | +        | +        | +              |     | H    |      | +        | +         | +    | dim      | +        |
| AML37 | + partial                 |       | +    |      | +        | +(p)      | +(p)   | +        | +(p;dim) | +              | H   | H    |      | +        | +(p)      | +    | negative | +        |
| AML38 | negative                  | + dim | +(p) |      | +        | +         | +      | +        | +        | +              | H   |      |      | +        | +         | +    | +        | +        |
| APL3  | negative                  |       | +(p) |      | +        | negative  | +      | +        | +        | +              |     | H    |      | +        | negative  | +    | +        | +        |
| APL1  | + partial                 |       |      |      | +        | +(p)      | +      | +(p;dim) | +        | +              | H   | H    |      | +        | +(p)      | +    | +        | +        |
| AML42 | + partial                 |       |      | +    | +        | +         | +      | +        | +        | +              | H   |      |      | +        | +         | +    | dim      | +        |
| AML40 | rare partial              | +     | +    |      | +        | +         | +      | +        | +        | +              | H   |      |      | +        | +         | +    | dim      | +        |
| AML41 | + partial                 |       |      | +    | +        | +         | +      | +        | +        | +              | H   |      | H    | +        | +         | +    | dim      | +        |
