# Supplementary material
Source: PubMed Central journal article supplement (PMC4652947)
Supplement: NIHMS702883-supplement-6.pdf [file NIHMS702883-supplement-6.pdf]

# Supplementary Table 4

The raw median ion counts (per cell) for each marker (table heading) in each manually gated immunophenotypic population (columns) of each patient sample (rows) are shown. Each cell of the table is color coded for its' relative intensity from green (lowest) to red (highest).

|                                                                                                                                                                                                                           |                       | CD45RA Median  |                          |                                                                |                                                        |                            |                                                |                                                             |       |                                                |                                               |                  |              |                          |                        |                            |              |            |                 |                    |                  |              |                   |             |                                                    |        |        |       |       |          |         |          |       |
|---------------------------------------------------------------------------------------------------------------------------------------------------------------------------------------------------------------------------|-----------------------|----------------|--------------------------|----------------------------------------------------------------|--------------------------------------------------------|----------------------------|------------------------------------------------|-------------------------------------------------------------|-------|------------------------------------------------|-----------------------------------------------|------------------|--------------|--------------------------|------------------------|----------------------------|--------------|------------|-----------------|--------------------|------------------|--------------|-------------------|-------------|----------------------------------------------------|--------|--------|-------|-------|----------|---------|----------|-------|
|                                                                                                                                                                                                                           |                       | Ungated        | CD34+CD38 <sup>low</sup> | CD45RA <sup>neg</sup> CD34 <sup>low</sup> CD38 <sup>high</sup> | CD33 <sup>neg</sup> CD34 <sup>CD38<sup>low</sup></sup> | HSC- 90α133 <sup>neg</sup> | MPP- 90α133 <sup>neg</sup> CD33 <sup>neg</sup> | CMP- CD34 <sup>CD38<sup>low</sup></sup> CD33 <sup>neg</sup> | GMP   | 34 <sup>neg</sup> CD38 <sup>high</sup> +Undiff | 34 <sup>neg</sup> CD38 <sup>high</sup> Undiff | Mylest/Mon ocyte | ProMonoocyte | CD14 <sup>neg</sup> Mono | CD14 <sup>+</sup> Mono | 11b+DR <sup>neg</sup> Mono | ProMyelocyte | Myelocytes | Meta-Myelocytes | Mature Granulocyte | Pro-erythroblast | Erythroblast | Late Erythroblast | Pre-B Cells | Mature B cells CD20 <sup>+</sup> CD19 <sup>+</sup> | Plasma | T Cell | pDC   | mDC   | Basophil | NK Cell | Platelet |       |
| TA-AML1_ AML26<br>TA-AML3_ AML35<br>TA-AML4_ AML5<br>(I6;21)                                                                                                                                                              | CBF-AML               | 1.61           | 1.54                     | 1.49                                                           | 1.49                                                   | 1.68                       | 1.4                                            | 1.97                                                        | 1.62  | 0.84                                           | 0.49                                          | 1.77             | 3.02         | 2.83                     | 2.05                   | 0.28                       | 1.63         | 2.18       | 1.83            | 1.41               | 1.31             | 1.12         | 0.47              | 0.76        | 2.41                                               | 1.7    | 1.03   | 1.58  | 4.43  | 0.88     | 2.15    | 1.67     |       |
|                                                                                                                                                                                                                           |                       | 2.73           | 1.73                     | 1.7                                                            | 1.65                                                   | 1.88                       | 1.59                                           | 2.15                                                        | 2.15  | 1.39                                           | 0.54                                          | 2.36             | 3.29         | 4.52                     | 10.56                  | 3.14                       | 3.16         | 5.96       | 6.53            | 4.32               | 2.94             | 2.61         | 0.87              | 3.5         | 2.56                                               | 3.32   | 1.32   | 1.98  | 11.19 | 2.69     | 5.11    | 5.48     |       |
|                                                                                                                                                                                                                           |                       | 3.37           | 3.43                     | 3.17                                                           | 3.22                                                   | 3.75                       | 2.91                                           | 4.1                                                         | 3.22  | 1.6                                            | 1.23                                          | 2.93             | 3.88         | 4.87                     | 7.85                   | 2.99                       | 3.5          | 1.91       | 2.7             | 2.24               | 7.36             | 3.76         | 0.49              | 5.97        | 3.25                                               | 4.61   | 1.81   | 1.4   | 19.82 | 3.15     | 4.21    | 1.53     |       |
| TA-AML1_ AML10<br>TA-AML2_ AML32                                                                                                                                                                                          | CBF-AML Inv(16)       | 1.33           | 1.63                     | 1.6                                                            | 1.37                                                   | 1.6                        | 1.28                                           | 1.78                                                        | 1.08  | 0.65                                           | 0.32                                          | 1.37             | 1.53         | 1.16                     | 1.12                   | 1.28                       | 1.39         | 1.2        | 1.15            | 2.08               | 2.32             | 2.48         | 2.48              | 1.74        | 2.24                                               | 2.83   | 2.5    | 1.27  | 2.01  | 1.81     | 0.78    | 3.92     | -0.73 |
|                                                                                                                                                                                                                           |                       | 2.19           | 2.02                     | 2.01                                                           | 1.97                                                   | 2.15                       | 1.93                                           | 2.11                                                        | 1.99  | 1.97                                           | 0.12                                          | 2.31             | 5.51         | 7.28                     | 7.57                   | 8.48                       | 3.5          | 4.02       | 2.68            | 2.23               | 4.45             | 2.4          | 1.22              | 4.75        | 3.83                                               | 3.2    | 1.18   | 2.86  | 7.06  | 2.69     | 3.81    | 2.03     |       |
| TA-AML3_ APL5<br>TA-AML3_ APL3<br>TA-AML2_ APL4<br>TA-AML4_ APL1                                                                                                                                                          | APL (15;17)           | 1.83           | 2.46                     | 2.2                                                            | 1.5                                                    | 1.04                       | 1.64                                           | 2.48                                                        | 1.74  | 1.23                                           | 0.78                                          | 1.73             | 3.76         | 4.36                     | 0.83                   | 2.58                       | 2.07         | 2.35       | 1.08            | 0.95               | 2.32             | 3.58         | 1.27              | 2.59        | 2.41                                               | 8.07   | 2.42   | 6.6   | 4.05  | 3.01     | 4.68    | X        |       |
| 1.68                                                                                                                                                                                                                      |                       | 1.45           | 1.31                     | 1.04                                                           | 1.22                                                   | 0.98                       | 2.07                                           | 1.31                                                        | 1.66  | 1.15                                           | 1.83                                          | 1.8              | 1.53         | 1.52                     | 2.41                   | 1.9                        | 0.97         | 1.05       | 1.08            | 3.24               | 2.27             | 1.49         | 2.32              | 3.23        | 3.37                                               | 2.56   | 4.59   | 4.16  | 2.32  | 3.7      | 2.45    |          |       |
| 1.39                                                                                                                                                                                                                      |                       | 1.6            | 1.04                     | 0.89                                                           | 1.1                                                    | 0.86                       | 2.2                                            | 1.47                                                        | 1.16  | 0.93                                           | 1.47                                          | 3.21             | 3.89         | 2.07                     | 2.69                   | 1.47                       | 1.39         | 0.87       | 0.85            | 1.81               | 2.33             | 0.73         | 1.64              | 2.37        | 2.93                                               | 0.95   | 3.26   | 2.05  | 2.92  | 4.38     | 2.24    |          |       |
| 1.67                                                                                                                                                                                                                      |                       | 1.76           | 1.71                     | 0.71                                                           | 0                                                      | 0.79                       | 1.79                                           | 0.78                                                        | 0.91  | 0.39                                           | 1.59                                          | 2.39             | 3.13         | 1.19                     | 2.11                   | 1.84                       | 1.16         | 0.8        | 1.01            | 1.66               | 2.62             | 0.89         | 1.92              | 3.58        | 5.49                                               | 2.41   | 1.33   | 3.18  | 2.56  | 4.99     | 0.56    |          |       |
| TA-AML1_ AML27<br>TA-AML3_ AML7<br>TA-AML3_ AML9<br>TA-AML2_ AML20<br>TA-AML2_ AML21<br>TA-AML2_ AML23<br>TA-AML2_ AML30<br>TA-AML2_ AML39<br>TA-AML4_ AML37<br>TA-AML4_ AML38<br>TA-AML4_ AML40                          | FLT3-ITD+ NK-AML      | 1.91           | 2.87                     | 2.63                                                           | 2.18                                                   | 2.48                       | 2.15                                           | 2.93                                                        | 2.05  | 1.1                                            | 1.18                                          | 1.76             | 2.77         | 3.28                     | 2.21                   | 2.05                       | 1.57         | 1.83       | 1               | 0.59               | 3.68             | 2.59         | -0.15             | 1.73        | 3.6                                                | 2.62   | 1.23   | 2.68  | 2.7   | 1.05     | 5.75    | 2.25     |       |
| 3.74                                                                                                                                                                                                                      |                       | 2.15           | 1.77                     | 0.58                                                           | 0.4                                                    | 0.58                       | 2.97                                           | 1.28                                                        | 1.73  | 0.65                                           | 2.48                                          | 3.14             | 4.19         | 4.72                     | 6.57                   | 2.36                       | 1.26         | 1.58       | 1.64            | 3.3                | 3.26             | 2.42         | 3.33              | 3.5         | 4.25                                               | 2.04   | 2.45   | 5.94  | 5.68  | 6.53     | X       |          |       |
| 1.96                                                                                                                                                                                                                      |                       | 2.16           | 2.05                     | 1.64                                                           | 1.89                                                   | 1.6                        | 2.25                                           | 1.6                                                         | 1.91  | 0.68                                           | 1.81                                          | 2.06             | 2.14         | 2.84                     | 1.61                   | 2.47                       | 1.93         | 1.96       | 1.72            | 2.68               | 2.88             | 1.07         | 3.44              | 4.22        | 3.23                                               | 1.74   | 1.48   | 3.25  | 1.34  | 3.83     | 1.16    |          |       |
| 1.02                                                                                                                                                                                                                      |                       | 1.18           | 1.1                      | 0.73                                                           | 1.13                                                   | 0.71                       | 1.43                                           | 1.08                                                        | 0.64  | 0.39                                           | 1.16                                          | 1.48             | 1.56         | 1.48                     | 1.85                   | 1.15                       | 1.13         | 1.22       | 0.86            | 2.55               | 2.54             | 1.23         | 2.6               | 4.75        | 3.12                                               | 1.27   | 1.01   | 4.51  | 1.29  | 3.57     | 0.42    |          |       |
| 1.73                                                                                                                                                                                                                      |                       | 1.9            | 1.77                     | 1.49                                                           | 1.7                                                    | 1.45                       | 1.92                                           | 1.26                                                        | 1.34  | 0.51                                           | 1.49                                          | 2.07             | 1.74         | 1.24                     | 0.88                   | 1.81                       | 2.57         | 1.55       | 0.82            | 0.79               | 2.97             | 2.32         | 1.18              | 1.62        | 4.58                                               | 3.46   | 1.84   | 2     | 4.18  | 2.08     | 3.22    | -0.16    |       |
| 1.73                                                                                                                                                                                                                      |                       | 2.44           | 2.38                     | 1.88                                                           | 2.04                                                   | 1.86                       | 2.49                                           | 1.25                                                        | 1.17  | 0.84                                           | 1.57                                          | 1.33             | 0.97         | 1.22                     | 1                      | 2.01                       | 1.24         | 1.21       | 1.1             | 4.76               | 2.6              | 0.97         | 1.13              | 2.58        | 3.18                                               | 1.05   | 1.9    | 3.1   | 1.74  | 2.58     | X       |          |       |
| 1.35                                                                                                                                                                                                                      |                       | 2.73           | 2.37                     | 1.79                                                           | 1.09                                                   | 1.82                       | 2.79                                           | 1.19                                                        | 0.98  | 0.9                                            | 1.57                                          | 1.9              | 1.07         | 0.95                     | 1                      | 1.78                       | 1.72         | 1.31       | 1.3             | 4.38               | 3.06             | 0.89         | 2.92              | 2.24        | 3.73                                               | 1.13   | 2.36   | 0.85  | 1.11  | 4.89     | 1.54    |          |       |
| 1.73                                                                                                                                                                                                                      |                       | 1.95           | 1.38                     | 0.59                                                           | 0.76                                                   | 0.55                       | 2.15                                           | 1.27                                                        | 1.65  | 0.69                                           | 1.68                                          | 1.9              | 1.95         | 1.42                     | 2.48                   | 2.4                        | 2.6          | 2.37       | 1.76            | 2.57               | 2.73             | 0.59         | 2.36              | 2.16        | 3.29                                               | 1.65   | 2.9    | 1.4   | 0.48  | 3.37     | 0.69    |          |       |
| 1.79                                                                                                                                                                                                                      |                       | 2.5            | 2.39                     | 2.14                                                           | 2.52                                                   | 2.12                       | 2.78                                           | 2.83                                                        | 1.48  | 1.45                                           | 1.83                                          | 2.45             | 2.05         | 1.41                     | 1.18                   | 2.12                       | 1.71         | 1.58       | 1.57            | 2.59               | 3.71             | 1.34         | 3.59              | 2.68        | 3.86                                               | 1.62   | 1.9    | 2.9   | 1.39  | 5.65     | 1.13    |          |       |
| 1.47                                                                                                                                                                                                                      | 1.95                  | 1.28           | 0.6                      | 0.45                                                           | 0.63                                                   | 2.01                       | 0.7                                            | 0.76                                                        | 0.5   | 1.08                                           | 1.98                                          | 0.91             | 0.9          | 2.59                     | 2.65                   | 2.41                       | 2.91         | 1.79       | 3.15            | 1.96               | 0.72             | 1.76         | 3.45              | 3.57        | 1.48                                               | 0.39   | 1.97   | 1.17  | 2.54  | 2.44     |         |          |       |
| 0.83                                                                                                                                                                                                                      | 1.23                  | 1              | 0.73                     | 1.37                                                           | 0.67                                                   | 2.35                       | 0.94                                           | 0.47                                                        | -0.11 | 1.32                                           | 2.06                                          | 0.84             | 0.5          | 1.38                     | 1.15                   | 0.52                       | 0.47         | 0.83       | 1.17            | 1.88               | 0.83             | 1.73         | 5.57              | 3.19        | 0.91                                               | 0.32   | 2.19   | 1.88  | 2.64  | -0.05    |         |          |       |
| TA-AML3_ AML6<br>TA-AML2_ AML31<br>TA-AML4_ AML8                                                                                                                                                                          | FLT3-TKD+ NK-AML      | 1.77           | 2.76                     | 2.76                                                           | 2.61                                                   | 2.18                       | 2.64                                           | 3.01                                                        | 1.78  | 1.52                                           | 3.63                                          | 1.87             | 1.19         | 1.7                      | 1.44                   | 2.16                       | 2.91         | 3.41       | 3.67            | 3.18               | 2.28             | 2.99         | 1.48              | 3.91        | 3.61                                               | 5      | 1.83   | 3.51  | 2.1   | 2.87     | 5.41    | 2.37     |       |
| 0.88                                                                                                                                                                                                                      |                       | 1.09           | 1.10                     | 1.12                                                           | 1.12                                                   | 1.11                       | 1.09                                           | 1.02                                                        | 0.71  | 0.67                                           | 0.88                                          | 1.05             | 0.57         | 2.31                     | 0.66                   | 1.09                       | 1.08         | 0.83       | 0.7             | 1.94               | 2.71             | 1.69         | 1.57              | 3.72        | 4.16                                               | 1.41   | 0.64   | 1.38  | 0.56  | 5.24     | 0.36    |          |       |
| 1.35                                                                                                                                                                                                                      |                       | 0.94           | 0.9                      | 1.18                                                           | 0.93                                                   | 1.44                       | 0.42                                           | 0.83                                                        | 1.58  | -0.34                                          | 1.23                                          | 2.3              | 2.29         | 2.27                     | 1.42                   | 1.6                        | 1.15         | 1.28       | 1.56            | 1.85               | 2.7              | 2.06         | 1.21              | 4.33        | 3.45                                               | 1.41   | 1.69   | 1.01  | 0.87  | 4.53     | 0.92    |          |       |
| TA-AML1_ AML13<br>TA-AML3_ AML36<br>TA-AML2_ AML33<br>TA-AML2_ AML42<br>TA-AML4_ AML14<br>TA-AML4_ AML15                                                                                                                  | FLT3wt NK-AML         | 1.02           | 0.41                     | 0.31                                                           | 0.12                                                   | 0.86                       | 0.66                                           | 1.02                                                        | 0.36  | 0.15                                           | 0                                             | 0.63             | 0.92         | 1.22                     | 2.05                   | 1.55                       | 1.32         | 2.43       | 1.28            | 2.07               | 0.61             | 1.24         | 2.42              | 3.41        | 3.31                                               | 2.48   | 0.6    | 0.68  | 0.63  | 7.61     | 1.9     | -0.02    |       |
| 0.78                                                                                                                                                                                                                      |                       | -0.02          | -0.04                    | -0.06                                                          | 1.41                                                   | -0.07                      | 1.07                                           | 0.24                                                        | 0.04  | -0.03                                          | 1.13                                          | 1.3              | 2.11         | 1.87                     | 1.03                   | 1.62                       | 2.03         | 1.19       | 1.31            | 0.29               | 1.07             | 0.67         | 2.62              | 1.45        | 0.75                                               | 0.77   | 1.01   | -0.14 | 0.08  | 0.86     | -0.08   |          |       |
| 1.34                                                                                                                                                                                                                      |                       | 1.09           | 0.96                     | 0.84                                                           | 0.92                                                   | 0.79                       | 1.26                                           | 1.31                                                        | 1.59  | -0.13                                          | 1.68                                          | 1.74             | 1.34         | 1.23                     | 0.72                   | 1.32                       | 0.92         | 0.92       | 0.97            | 2.49               | 2.23             | 0.87         | 1.36              | 5.32        | 2.94                                               | 1.31   | 2.71   | 4.22  | 0.73  | 5.12     | 0.81    |          |       |
| 0.16                                                                                                                                                                                                                      |                       | 0.57           | 0.42                     | 0.31                                                           | 1.02                                                   | 0.21                       | 1.36                                           | 0.18                                                        | -0.12 | -0.15                                          | 0.73                                          | 0.71             | 0.61         | 0.79                     | 0.26                   | 0.75                       | 0.32         | 0.26       | 0.34            | -0.1               | 1.43             | 1.52         | 0.82              | 1.29        | 0.22                                               | 0.51   | 0.58   | 4.31  | 0.84  | 0.44     | -0.16   |          |       |
| 0.58                                                                                                                                                                                                                      |                       | 0              | -0.03                    | -0.04                                                          | 0.64                                                   | -0.11                      | 0.78                                           | 0.22                                                        | 0.11  | -0.12                                          | 0.33                                          | 1.12             | -0.15        | 1.49                     | 0.71                   | 0.36                       | -0.11        | -0.03      | 0.39            | 0.49               | 2.3              | 2.83         | 1.08              | 2.17        | 1.11                                               | 0.26   | 1.09   | 2.97  | 0.93  | 1.51     | -0.26   |          |       |
| 0.64                                                                                                                                                                                                                      |                       | 0.34           | 0.21                     | 0.1                                                            | 0.79                                                   | 0.05                       | 0.64                                           | 0.2                                                         | 0.14  | 0.01                                           | 0.75                                          | 1.31             | 1.52         | 1.65                     | 0.8                    | 1.1                        | 1.26         | 0.81       | 1.25            | 0.56               | 0.98             | 0.8          | 5.1               | 2.9         | 1.7                                                | 1.06   | 0.4    | 1.28  | 0.45  | 1.19     | -0.08   |          |       |
| TA-AML2_ AML22                                                                                                                                                                                                            | MLL (10;11)           | 0.94           | 1.3                      | 1.29                                                           | 0.6                                                    | 1.01                       | 0.55                                           | 1.37                                                        | 0.39  | 0.15                                           | 0.42                                          | 0.85             | 1            | 0.75                     | 0.87                   | 1.15                       | 1.09         | 0.83       | 0.72            | 0.64               | 2.66             | 1.78         | 0.77              | 1.76        | 3.54                                               | 2.08   | 1.63   | 2.1   | 3.47  | 0.84     | 3.11    | 0.99     |       |
| 1.61                                                                                                                                                                                                                      |                       | 1.22           | 1.22                     | 1.23                                                           | 2.29                                                   | 0.99                       | 1.22                                           | 1.2                                                         | 1.29  | 0.22                                           | 1.71                                          | 1.86             | 0.95         | 1.21                     | 1.28                   | 1.39                       | 1.11         | 0.7        | 0.66            | 2.39               | 1.6              | 0.56         | 1.51              | 3.23        | 1.26                                               | 1.17   | 2.83   | 5.21  | -0.21 | 4.54     | 1.68    |          |       |
| TA-AML1_ AML18<br>TA-AML3_ AML4<br>TA-AML2_ AML19<br>TA-AML2_ AML29<br>TA-AML2_ AML41<br>TA-AML4_ AML25                                                                                                                   | ADK-AML<br>Emply/Mono | 1.2            | 1.56                     | 1.43                                                           | 1.24                                                   | 2.14                       | 0.97                                           | 2.41                                                        | 1.01  | 1.09                                           | -0.23                                         | 1.18             | 1.27         | 0.88                     | 1.44                   | 0.6                        | 0.87         | 0.81       | 0.62            | 0.64               | 1.73             | 3.13         | 1.59              | 3.74        | 2.84                                               | 2.39   | 1.26   | 2.8   | 6.48  | 1.73     | 3       | 0.63     |       |
| 1.28                                                                                                                                                                                                                      |                       | 1.19           | 1.12                     | 0.96                                                           | 1.13                                                   | 0.94                       | 1.29                                           | 0.83                                                        | 1.36  | 0.75                                           | 1.22                                          | 1.59             | 2.43         | 0.96                     | 10.1                   | 1.82                       | 1.96         | 1.57       | 1.31            | 2.54               | 2.43             | 1.31         | 6.32              | 3.98        | 3.98                                               | 1.33   | 0.88   | 2.55  | 0.73  | 2.42     | 1.67    |          |       |
| 1.45                                                                                                                                                                                                                      |                       | 1.3            | 1.17                     | 0.78                                                           | 1.38                                                   | 0.7                        | 1.55                                           | 0.89                                                        | 1.29  | 1.18                                           | 1.36                                          | 2.11             | 1.83         | 1.9                      | 1.37                   | 2.05                       | 1.28         | 1.12       | 0.71            | 1.96               | 2.41             | 1.63         | 0.94              | 2.35        | 2.54                                               | 2.36   | 1.98   | 2.4   | -0.08 | 4.56     | 0.63    |          |       |
| 0.41                                                                                                                                                                                                                      |                       | 0.16           | 0.06                     | -0.03                                                          | 0.33                                                   | -0.11                      | 0.69                                           | -0.05                                                       | -0.03 | -0.14                                          | -0.16                                         | 0.07             | 0.34         | 0.44                     | 0.2                    | 0.4                        | 0.63         | 0.59       | 0.55            | 0.61               | 2                | 1.13         | 5.2               | 2.33        | 1.3                                                | 0.44   | 0.12   | 0.42  | 1.53  | 0.46     | 0.23    |          |       |
| 0.56                                                                                                                                                                                                                      |                       | 0.19           | 0.06                     | -0.01                                                          | 0.38                                                   | -0.15                      | 0.62                                           | 0.15                                                        | 0.05  | -0.24                                          | 0.35                                          | -0.11            | 0.18         | 0                        | 0.05                   | 0.75                       | 0.48         | 0.43       | 0.53            | 0.81               | 1.47             | 0.77         | 2.58              | 3.2         | 0.88                                               | 1.12   | 1.38   | -0.09 | 0.25  | 1.74     | -0.11   |          |       |
| TA-AML1_ NI-1<br>TA-AML1_ NI-3<br>TA-AML1_ NI-5<br>TA-AML1_ NI-6<br>TA-AML3_ NI-4<br>TA-AML3_ NI-4<br>TA-AML3_ NI-5<br>TA-AML2_ NI-6<br>TA-AML2_ NI-3<br>TA-AML2_ NI-4<br>TA-AML4_ NI-3<br>TA-AML4_ NI-4<br>TA-AML4_ NI-5 |                       | Healthy Donors | 0.81                     | 0.95                                                           | 0.79                                                   | 0.64                       | 0.85                                           | 0.46                                                        | 1.2   | 0.79                                           | 1.04                                          | -0.06            | 1.05         | 1.05                     | 1.02                   | 0.93                       | 0.47         | 0.83       | 0.61            | 0.59               | 0.6              | 1.97         | 1.2               | 0.49        | 1.04                                               | 3.12   | 1.24   | 1.68  | 2.42  | 2.89     | 0.51    | 4.76     | 2.14  |
| 0.82                                                                                                                                                                                                                      | 0.95                  |                | 0.68                     | 0.65                                                           | 0.74                                                   | 0.5                        | 1.28                                           | 0.83                                                        | 0.79  | 0.06                                           | 1.06                                          | 1.77             | 1.88         | 1.07                     | 1.63                   | 0.76                       | 0.65         | 0.7        | 0.68            | 1.58               | 1.23             | 0.64         | 1.09              | 2.46        | 0.91                                               | 1.18   | 1.99   | 2.86  | 0.38  | 4.51     | 1.99    |          |       |
| 0.99                                                                                                                                                                                                                      | 1.04                  |                | 0.76                     | 0.74                                                           | 0.79                                                   | 0.73                       | 1.53                                           | 0.73                                                        | 0.89  | 0.09                                           | 1.16                                          | 1.92             | 2.08         | 1.22                     | 1.68                   | 0.75                       | 0.66         | 0.74       | 0.73            | 2.28               | 1.5              |              |                   |             |                                                    |        |        |       |       |          |         |          |       |

|               |                    |        | CD7 Median |                          |                                                |                                              |                           |                           |                              |       |                  |                               |                 |             |                          |           |                            |              |            |                 |                    |                  |              |                   |             |                           |        |        |       |        |          |         |          |      |  |  |  |  |
|---------------|--------------------|--------|------------|--------------------------|------------------------------------------------|----------------------------------------------|---------------------------|---------------------------|------------------------------|-------|------------------|-------------------------------|-----------------|-------------|--------------------------|-----------|----------------------------|--------------|------------|-----------------|--------------------|------------------|--------------|-------------------|-------------|---------------------------|--------|--------|-------|--------|----------|---------|----------|------|--|--|--|--|
|               |                    |        | Ungated    | CD34+CD38 <sup>low</sup> | CD49AR <sup>neg</sup> CD34+CD38 <sup>low</sup> | CD33 <sup>neg</sup> CD34+CD38 <sup>low</sup> | HSC-90h133 <sup>neg</sup> | MPP-90h133 <sup>neg</sup> | CMP-CD34+CD33 <sup>mid</sup> | GMP   | 34negCD38+Undiff | 34neg38 <sup>neg</sup> Undiff | Myelo/Monoblast | ProMonocyte | CD14 <sup>neg</sup> Mono | CD14+Mono | 11b+DR <sup>neg</sup> Mono | ProMyelocyte | Myelocytes | Meta-myelocytes | Mature Granulocyte | Pro-erythroblast | Erythroblast | Late Erythroblast | Pre-B Cells | Mature B cells CD20+CD19+ | Plasma | T Cell | pDC   | mDC    | Basophil | NK Cell | Platelet |      |  |  |  |  |
| TA-AML1_AML26 | CBF-AML (16/21)    | 0.09   | 0.64       | 0.62                     | 0.61                                           | 0.74                                         | 0.56                      | 0.81                      | 0.76                         | -0.15 | -0.24            | 0.34                          | 0               | 0           | -0.14                    | 1.3       | 0                          | 0            | -0.01      | -0.06           | 2.05               | 1.55             | 0            | 0                 | -0.21       | -0.03                     | 13.86  | 0      | -0.03 | -0.08  | -0.08    | 120.79  | 3.64     |      |  |  |  |  |
| TA-AML3_AML35 |                    | 0.54   | 0.9        | 0.9                      | 0.87                                           | 1.16                                         | 0.81                      | 1.04                      | 1.46                         | -0.13 | -0.38            | 1.04                          | 0.05            | 0.13        | 0.03                     | 1.5       | 0                          | 0.16         | 0.13       | 0.04            | 1.91               | 2.65             | 0.49         | 0.49              | 0.49        | -0.3                      | 0.44   | 56.5   | 1.69  | 0.48   | 0        | 404.2   | 0.26     |      |  |  |  |  |
| TA-AML3_AML5  |                    | 0.59   | 1.3        | 1.19                     | 1.21                                           | 1.43                                         | 1.09                      | 1.52                      | 1.47                         | 0.02  | -0.24            | 0.84                          | 0.16            | -0.11       | -0.16                    | -0.17     | 1.16                       | -0.16        | -0.16      | -0.2            | 10.95              | 4.81             | 0.68         | 0.35              | -0.28       | 0.38                      | 61.43  | -0.04  | -0.11 | 0      | 379.8    | 0.62    |          |      |  |  |  |  |
| TA-AML1_AML10 | CBF-AML Inv(16)    | 0      | 0.32       | 0.31                     | 0.21                                           | 0.36                                         | 0.16                      | 0.39                      | 0                            | -0.03 | -0.06            | -0.12                         | -0.08           | 0           | -0.03                    | -0.06     | -0.12                      | -0.08        | 0          | -0.03           | -0.05              | -0.14            | 1.28         | 3.11              | 1.63        | 0.64                      | -0.25  | 0      | 41.06 | 0      | -0.1     | -0.13   | 130.96   | 2.62 |  |  |  |  |
| TA-AML2_AML32 |                    | 0.81   | 0.69       | 0.68                     | 0.67                                           | 0.78                                         | 0.65                      | 0.73                      | 0.73                         | 0.19  | -0.28            | 0.72                          | -0.07           | -0.06       | -0.1                     | 1.06      | 0                          | 0.5          | 0.24       | 0.08            | 0.06               | 8.58             | 4.47         | 0.65              | -0.09       | -0.22                     | 0.31   | 93.4   | 0.62  | -0.07  | 0.19     | 420.68  | 1.1      |      |  |  |  |  |
| TA-AML3_APL5  | APL (15/17)        | 0.41   | 2.97       | 2.73                     | 0.86                                           | 0.49                                         | 1.08                      | 3.03                      | 1.66                         | 0.07  | -0.15            | 0.31                          | 0.54            | 0.23        | -0.2                     | 0.36      | 0.6                        | 0.37         | -0.13      | -0.16           | 2.06               | 4.82             | 0.91         | 1.75              | -0.34       | -0.23                     | 78.11  | 1.67   | -0.2  | 0.55   | 208.16   | X       |          |      |  |  |  |  |
| TA-AML3_APL3  |                    | 0.29   | 0.16       | 0.15                     | -0.1                                           | -0.19                                        | -0.02                     | 0.56                      | 0.43                         | 0.17  | -0.15            | 0.19                          | -0.25           | -0.26       | -0.29                    | -0.09     | 0.25                       | -0.15        | -0.14      | -0.14           | 4.54               | 2.24             | 0.47         | 0.43              | -0.29       | 0.29                      | 39.71  | 9.22   | -0.15 | 0.6    | 197.79   | 0.48    |          |      |  |  |  |  |
| TA-AML2_APL4  |                    | 0.5    | 1.16       | 0.6                      | 0.43                                           | 0.46                                         | 0.43                      | 1.48                      | 3.83                         | 0.48  | 0.1              | 0.44                          | 0.67            | 0.48        | 0.0                      | -0.16     | 0.33                       | 0.53         | 0.7        | -0.13           | -0.09              | 5.78             | 3.08         | 0.75              | 0.17        | -0.29                     | 0.56   | 92.49  | 1.79  | -0.22  | 0.59     | 221.5   | 1.01     |      |  |  |  |  |
| TA-AML4_APL1  |                    | 0.98   | 4.65       | 4.51                     | 0.75                                           | -0.54                                        | 0.93                      | 4.81                      | 1.79                         | 0.14  | -0.29            | 0.94                          | 1.77            | -0.02       | -0.12                    | 0.18      | 1.09                       | -0.01        | -0.24      | -0.2            | 3.41               | 4.96             | 0.43         | -0.3              | -0.37       | -0.12                     | 62.34  | 1.34   | -0.16 | 0.26   | 230.2    | 0.58    |          |      |  |  |  |  |
| TA-AML1_AML27 | FLT3-ITD+ NK-AML   | 7.41   | 27.57      | 27.78                    | 31.36                                          | 31.31                                        | 31.36                     | 27.37                     | 18.65                        | 5.94  | 3.66             | 6.27                          | 11.28           | 5.48        | -0.01                    | 0.62      | 0.74                       | 1.23         | 0          | -0.15           | 12.66              | 5.08             | 1.1          | 0.7               | -0.26       | 0                         | 61.73  | 10.99  | 5.1   | 0.19   | 402.98   | 1.32    |          |      |  |  |  |  |
| TA-AML3_AML7  |                    | -0.13  | 0.16       | 0.18                     | -0.1                                           | 0.06                                         | -0.13                     | 0.2                       | 0.08                         | -0.17 | -0.34            | -0.12                         | -0.16           | -0.21       | -0.22                    | -0.2      | -0.09                      | -0.21        | -0.14      | -0.1            | 1.38               | 2.23             | 0.87         | 0.01              | -0.33       | -0.27                     | 132.5  | -0.27  | -0.07 | -0.05  | 601.26   | X       |          |      |  |  |  |  |
| TA-AML3_AML9  |                    | 0.44   | 1.82       | 1.52                     | 1.4                                            | 0.91                                         | 1.51                      | 1.85                      | 0.43                         | 0.39  | 0.13             | 1.51                          | 0.33            | -0.22       | -0.27                    | -0.11     | 0.22                       | -0.08        | -0.06      | -0.11           | 3.01               | 4.99             | 0.53         | -0.15             | -0.26       | 0.22                      | 77.24  | 6.04   | -0.19 | -0.14  | 91.93    | 0.66    |          |      |  |  |  |  |
| TA-AML2_AML20 |                    | 34.38  | 44.61      | 38.04                    | 39.03                                          | 74.5                                         | 39.03                     | 31.06                     | 117.69                       | 73.69 | 0.42             | 21.52                         | 2.08            | -0.16       | -0.23                    | -0.16     | 1.02                       | 0.19         | -0.12      | -0.21           | 6.02               | 4.86             | 1.34         | 0.49              | -0.22       | 0.46                      | 104.23 | 19.55  | 0.06  | 0.43   | 344.96   | 0.05    |          |      |  |  |  |  |
| TA-AML2_AML21 |                    | 31.68  | 40.78      | 38.78                    | 57.34                                          | 52.31                                        | 57.87                     | 40.11                     | 42.29                        | 11.47 | 2.66             | 26.82                         | 32.31           | -0.08       | -0.22                    | 7.51      | 0.82                       | 0.18         | -0.17      | -0.15           | 6.1                | 4.44             | 0.65         | -0.15             | -0.17       | 0.27                      | 39.74  | 0.87   | -0.16 | 1.17   | 193.62   | 1.2     |          |      |  |  |  |  |
| TA-AML2_AML23 |                    | 0.31   | 0.37       | 0.35                     | 0.23                                           | 0.33                                         | 0.22                      | 0.38                      | 0                            | -0.11 | -0.22            | 0.24                          | -0.1            | -0.17       | -0.17                    | -0.15     | 0.3                        | 0.08         | -0.16      | -0.13           | 8.22               | 5.05             | 0.36         | -0.11             | -0.28       | 0.23                      | 73.44  | -0.05  | -0.05 | -0.3   | 164.21   | X       |          |      |  |  |  |  |
| TA-AML2_AML30 |                    | -0.04  | 0.39       | 0.2                      | 0.23                                           | 0.77                                         | 0.19                      | 0.4                       | 0.18                         | -0.07 | -0.14            | 0.07                          | 0.04            | -0.1        | -0.16                    | -0.15     | 0                          | -0.09        | -0.16      | -0.15           | 5.01               | 4.02             | 0.94         | 0.12              | -0.29       | 0.49                      | 87.37  | 0.24   | -0.16 | 0.22   | 688.7    | 0.71    |          |      |  |  |  |  |
| TA-AML2_AML39 |                    | 0.04   | 1.89       | 0.76                     | -0.09                                          | -0.52                                        | -0.08                     | 2.14                      | 3.02                         | -0.08 | -0.22            | 0.33                          | 0.46            | 0.05        | -0.13                    | -0.02     | 0.18                       | 0.07         | -0.01      | -0.09           | 2.54               | 3.88             | 0.49         | -0.01             | -0.31       | 0.32                      | 58.45  | 3.61   | -0.06 | -0.39  | 132.57   | 2.87    |          |      |  |  |  |  |
| TA-AML4_AML37 |                    | 0.95   | 1.43       | 1.39                     | 1.16                                           | 1.43                                         | 1.14                      | 1.65                      | 0.64                         | 1.08  | 1.08             | 0.93                          | 0.95            | 1.39        | -0.18                    | -0.39     | -0.1                       | 0.89         | -0.04      | -0.11           | -0.16              | 12.51            | 5.37         | 0.66              | -0.18       | -0.39                     | 0.22   | 140.26 | 1.03  | 0.17   | 0.37     | 157.46  | 1.72     |      |  |  |  |  |
| TA-AML4_AML40 |                    | 1.2    | 1.48       | 0.64                     | -0.04                                          | 0.96                                         | -0.1                      | 1.57                      | -0.35                        | -0.09 | -0.29            | 0.52                          | 0.77            | -0.25       | -0.15                    | -0.21     | -0.01                      | -0.17        | -0.16      | -0.24           | 6.08               | 3.43             | 0.33         | -0.37             | -0.36       | 0.14                      | 152.85 | 0.63   | -0.16 | -0.08  | 57.44    | 4.25    |          |      |  |  |  |  |
| TA-AML4_AML38 | 8.26               | 14.13  | 11.67      | 11.5                     | 10.66                                          | -11.97                                       | 15.23                     | 14.72                     | 1.57                         | -0.1  | 3.56             | 4.33                          | -0.44           | -0.24       | -0.23                    | 1.75      | -0.29                      | -0.33        | -0.29      | 10.29           | 2.96               | 0.72             | 0.37         | 0.14              | -0.03       | 152.84                    | 1.43   | 1.78   | -0.15 | -0.18  | 21.11    | -0.15   |          |      |  |  |  |  |
| TA-AML3_AML6  | FLT3-TKD+ NK-AML   | -0.1   | 0.06       | 0.04                     | 0.02                                           | 0.26                                         | -0.01                     | 0.1                       | -0.01                        | -0.1  | -0.17            | -0.03                         | -0.24           | -0.22       | -0.27                    | -0.23     | 0.16                       | -0.11        | -0.11      | -0.09           | 2.07               | 2.61             | 0.64         | -0.09             | -0.3        | 0.49                      | 107.18 | 0.37   | 0.14  | 0.12   | 171.98   | 0.77    |          |      |  |  |  |  |
| TA-AML2_AML31 |                    | 0.18   | 0.34       | 0.33                     | 0.22                                           | 0.97                                         | 0.18                      | 0.36                      | 0.31                         | 0.09  | -0.06            | 0.16                          | 0.19            | -0.28       | -0.14                    | -0.03     | 0.33                       | 0.72         | -0.14      | -0.13           | 2.88               | 3.24             | 1.1          | 0.29              | -0.23       | 0.36                      | 128.99 | -0.06  | 0.31  | -0.16  | 498.26   | 0.12    |          |      |  |  |  |  |
| TA-AML4_AML8  |                    | 1.52   | 0.64       | 0.54                     | 0.6                                            | 0.78                                         | 0.22                      | 0.61                      | -0.08                        | -0.1  | -0.41            | -0.11                         | -0.16           | -0.16       | -0.16                    | -0.25     | -0.11                      | -0.24        | -0.25      | -0.22           | 4.08               | 4.91             | 6.59         | 0.38              | -0.41       | -0.1                      | 105.57 | -0.08  | -0.21 | 0.57   | 225.44   | -1.04   |          |      |  |  |  |  |
| TA-AML1_AML13 | FLT3wt NK-AML      | -0.01  | -0.05      | -0.1                     | -0.14                                          | 0.06                                         | -0.16                     | 0                         | -0.13                        | -0.19 | -0.24            | -0.13                         | -0.31           | -0.32       | -0.3                     | -0.31     | -0.11                      | -0.15        | -0.23      | -0.15           | 0.79               | 1.04             | 0.25         | -0.24             | -0.18       | -0.4                      | 23.6   | 0      | -0.3  | 0      | 95.74    | -0.15   |          |      |  |  |  |  |
| TA-AML3_AML36 |                    | 1      | -0.24      | -0.25                    | -0.26                                          | -0.16                                        | -0.27                     | 0.17                      | -0.24                        | -0.31 | -0.19            | -0.1                          | -0.28           | -0.27       | -0.26                    | -0.26     | -0.14                      | -0.11        | -0.26      | -0.26           | 0.49               | 1.32             | 0.22         | -0.26             | -0.33       | -0.32                     | 32.64  | -0.33  | -0.54 | -0.45  | 40.63    | -0.26   |          |      |  |  |  |  |
| TA-AML2_AML33 |                    | 1.66   | 9.81       | 9.78                     | 9.08                                           | 9.1                                          | 8.99                      | 10.61                     | 23.85                        | 0.58  | -0.28            | 27.58                         | 10.33           | -0.28       | -0.17                    | -0.17     | 0.31                       | -0.05        | -0.03      | -0.02           | 12.15              | 4.04             | 0.6          | -0.2              | -0.16       | 0.07                      | 46.7   | 0.66   | -0.17 | -0.21  | 240.85   | 1.21    |          |      |  |  |  |  |
| TA-AML2_AML42 |                    | -0.15  | -0.07      | -0.21                    | -0.27                                          | -0.13                                        | -0.32                     | 12.15                     | -0.11                        | -0.28 | -0.19            | -0.17                         | -0.3            | -0.31       | -0.31                    | -0.26     | -0.24                      | -0.31        | -0.3       | -0.28           | 0.14               | 1.22             | 0.2          | 0.75              | -0.3        | -0.29                     | 21.16  | -0.3   | -0.11 | -0.72  | 62.21    | -0.22   |          |      |  |  |  |  |
| TA-AML4_AML14 |                    | 0.08   | -0.17      | -0.19                    | -0.19                                          | 0.14                                         | -0.23                     | 0.25                      | 0.09                         | -0.22 | -0.37            | -0.4                          | -0.38           | -0.46       | -0.38                    | -0.4      | -0.19                      | -0.39        | -0.39      | -0.32           | 0.61               | 1.05             | -0.13        | -0.39             | -0.37       | -0.36                     | 34.67  | 0.07   | -0.28 | -0.16  | 159.76   | -0.24   |          |      |  |  |  |  |
| TA-AML4_AML15 | 95.56              | 119.08 | 98.45      | 26.9                     | 0.63                                           | 50.74                                        | 173.32                    | 235.25                    | 106.58                       | 46.11 | 180.59           | 285.13                        | 0.55            | -0.45       | -0.08                    | 17.75     | 179.01                     | -0.32        | -0.26      | 3.19            | 1.4                | 0.55             | -0.47        | -0.36             | -0.22       | 81.51                     | 0.52   | -0.73  | -0.31 | 232.34 | 0.47     |         |          |      |  |  |  |  |
| TA-AML2_AML22 | MLL (10;11)        | 0.31   | 0.43       | 0.41                     | 0                                              | 0.17                                         | 0                         | 0.47                      | -0.1                         | -0.22 | -0.15            | 0.04                          | -0.02           | -0.24       | -0.1                     | -0.16     | 0.06                       | -0.13        | -0.14      | -0.19           | 4.56               | 2.87             | 0.61         | 0.72              | -0.21       | 0.04                      | 154.08 | 34.75  | 0.21  | -0.35  | 410.14   | 0.8     |          |      |  |  |  |  |
| TA-AML1_AML18 | ADK-AML Cmplx/Mono | 0.62   | 0.26       | 0.23                     | 0.25                                           | 0.61                                         | 0.15                      | 0.31                      | 0.16                         | 0     | -0.21            | 0.62                          | 0.83            | -0.18       | -0.25                    | -0.15     | 0.27                       | 0            | -0.15      | -0.17           | 2.47               | 2.43             | 0.63         | -0.22             | -0.23       | 0.51                      | 42.73  | 0.69   | -0.13 | -0.36  | 342.54   | 1.02    |          |      |  |  |  |  |
| TA-AML3_AML4  |                    | 0.46   | 1.8        | 1.64                     | 1.59                                           | 2.24                                         | 1.31                      | 2.04                      | 1.64                         | -0.05 | -0.35            | 0.47                          | -0.09           | -0.28       | -0.27                    | -0.24     | -0.16                      | -0.24        | -0.28      | -0.27           | 1.81               | 3.99             | 0.84         | -0.08             | -0.27       | 0.02                      | 54.94  | 0.91   | 0.37  | 0.16   | 183.04   | 0.59    |          |      |  |  |  |  |
| TA-AML2_AML19 |                    | 35.22  | 63.25      | 52.02                    | 104.98                                         | 65.28                                        | 113.66                    | 45.64                     | 50.53                        | 3.61  | 65.73            | 9.04                          | 62.29           | 1           | -0.12                    | 1.08      | 0.57                       | 0.79         | 0.03       | -0.07           | 2.69               | 3.18             | 0.73         | 0.66              | -0.12       | 0.53                      | 66.54  | 0.32   | 0.26  | -0.01  | 116.77   | 1.71    |          |      |  |  |  |  |
| TA-AML2_AML29 |                    | 15.69  | 12.1       | 11.08                    | 9.07                                           | 10.43                                        | 8.81                      | 13.39                     | 15.5                         | 29.96 | 11.65            | 14.51                         | 0.57            | -0.25       | -0.17                    | 0.18      | 15.46                      | 0.27         | 0.28       | -0.15           | 8                  | 4.99             | 1.37         | -0.15             | -0.25       | 0.13                      | 96.26  | 48.52  | -0.34 | 0.41   | 357.17   | 0.58    |          |      |  |  |  |  |
| TA-AML2_AML41 |                    | 0.04   | 0.16       | 0.04                     | -0.05                                          | 0.2                                          | -0.12                     | 0.87                      | -0.11                        | -0.21 | -0.15            | -0.32                         | -0.32           | -0.31       | -0.31                    | -0.34     | -0.25                      | -0.28        | -0.28      | -0.3            | 1.07               | 3.6              | 0.52         | 0.68              | -0.15       | -0.22                     | 60.09  | -0.04  | -0.02 | -0.19  | 204.01   | -0.11   |          |      |  |  |  |  |
| TA-AML4_AML25 | 0.19               | -0.25  | -0.27      | -0.29                    | -0.21                                          | -0.34                                        | -0.16                     | -0.19                     | -0.25                        | -0.38 | -0.05            | -0.4                          | -0.31           | -0.39       | -0.38                    | -0.19     | -0.3                       | -0.29        | -0.25      | 2.8             | 2.53               | 0.3              | -0.31        | -0.35             | -0.29       | 141.66                    | -0.12  | -0.47  | -0.16 | 314.75 | -0.18    |         |          |      |  |  |  |  |
| TA-AML1_N1-1  | Healthy Donors     | 0      | 0.46       | 0.32                     | 0.14                                           | -0.05                                        | 0.45                      | 0.92                      | 0.19                         | 0.01  | -0.34            | 0                             | -0.14           | -0.12       | -0.14                    | -0.26     | 0                          | -0.12        | -0.11      | -0.11           | 4.53               | 2.03             | 0            | -0.22             | -0.21       | 0                         | -0.12  | -0.21  | 0     | -0.12  | 123.42   | 2.26    |          |      |  |  |  |  |
| TA-AML1_N1-3  |                    | 0      | 0.34       | 0.21                     | 0.17                                           | 0.21                                         | 0.09                      | 0.77                      | 0.4                          | -0.04 | -0.31            | 0                             | -0.05           | -0.05       | -0.15                    | -0.02     | 0                          | -0.07        | -0.04      | -0.04           | 3.1                | 1.64             | 0.35         | -0.18             | -0.25       | -0.06                     | 18.72  | 0      | -0.03 | -0.17  | 113.16   | 0       |          |      |  |  |  |  |
| TA-AML1_N1-5  |                    | 0      | 0.78       | 0.58                     | 0.47                                           | 0.36                                         | 0.67                      | 1.06                      | 0.58                         | 0     | 0                | -0.28                         | 0               | 0           | 0                        | -0.14     | -0.01                      | 0            | -0.04      | -0.04           | -0.05              | 5.94             | 3.15         | 0.27              | -0.19       | -0.23                     | -0.04  | 21.96  | 0     | -0.23  | -0.17    |         |          |      |  |  |  |  |

**CD71 Median**

|               | Ungated | CD34+CD38 <sup>low</sup> | CD49aR <sup>neg</sup> CD34+CD38 <sup>low</sup> | CD33 <sup>neg</sup> CD34 <sup>+</sup> CD38 <sup>low</sup> | HSC-90hi33neg | MPP-90 <sup>low</sup> 33 <sup>neg</sup> | CMP-CD34 <sup>+</sup> CD33 <sup>mid</sup> | GMP   | 34negCD38+Undiff | 34neg38negUndiff | Myelo/Monoblast | ProMonocyte | CD14 <sup>neg</sup> Mono | CD14 <sup>+</sup> Mono | 11b+DR <sup>neg</sup> | ProMyelocyte | Myelocytes | Meta-myelocytes | Mature Granulocyte | Pro-erythroblast | Erythroblast | Late Erythroblast | Pre-B Cells | Mature B CD20+CD19 <sup>+</sup> | Plasma | T Cell | pDC   | mDC   | Basophilt | NK Cell | Platelet |      |
|---------------|---------|--------------------------|------------------------------------------------|-----------------------------------------------------------|---------------|-----------------------------------------|-------------------------------------------|-------|------------------|------------------|-----------------|-------------|--------------------------|------------------------|-----------------------|--------------|------------|-----------------|--------------------|------------------|--------------|-------------------|-------------|---------------------------------|--------|--------|-------|-------|-----------|---------|----------|------|
| TA-AML1_AML26 | 1.04    | 5.07                     | 5.01                                           | 4.98                                                      | 5.01          | 4.96                                    | 5.14                                      | 5.79  | 4.61             | 1.34             | 6.07            | 5.57        | 2.03                     | 0.63                   | 2.83                  | 1.98         | 0.47       | 0               | 396.32             | 379.65           | 72.83        | 10.86             | 1.76        | 10.87                           | 0.75   | 3.76   | 8.44  | 1.7   | 2.88      | 11.53   |          |      |
| TA-AML1_AML35 | 6.38    | 10.07                    | 10.08                                          | 9.83                                                      | 11.02         | 9.58                                    | 10.97                                     | 13.34 | 7.76             | 0.96             | 12.88           | 3.74        | 2.76                     | 2.09                   | 1.4                   | 5.31         | 1.04       | 0.57            | 0.26               | 340.73           | 401.49       | 56.21             | 14.51       | 1.16                            | 28.7   | 1.99   | 5.35  | 11.62 | 0.53      | 5.32    | 2.07     |      |
| TA-AML1_AML10 | 4.74    | 7.19                     | 7.39                                           | 7.34                                                      | 7.18          | 7.44                                    | 6.86                                      | 25.85 | 29.94            | 3.18             | 27.15           | 7.56        | 2.58                     | 0.86                   | 1.23                  | 15.03        | 0.69       | 0.15            | -0.07              | 1590.33          | 722.59       | 58.33             | 35.39       | 1.07                            | 23.15  | 1.93   | 3.05  | 3.28  | 1.23      | 4.6     | 5.7      |      |
| TA-AML1_AML15 | 3.36    | 4.15                     | 4.14                                           | 3.25                                                      | 3.58          | 3.16                                    | 4.74                                      | 2.98  | 1.16             | 0.93             | 5.12            | 3.95        | 3.65                     | 1.64                   | 1.17                  | 7.17         | 1.17       | 1.84            | 0.56               | 0                | 322.52       | 578.02            | 73.15       | 19.85                           | 1.05   | 12.31  | 1.74  | 10.84 | 2.25      | 0.32    | 3.25     | 7.73 |
| TA-AML2_AML21 | 10.64   | 10.62                    | 10.67                                          | 9.85                                                      | 9.94          | 9.84                                    | 12.2                                      | 12.61 | 21.34            | 0.05             | 13.08           | 1.24        | 0.62                     | 0.38                   | 2.39                  | 10.62        | 1.66       | 0.25            | 0.18               | 1862.45          | 781.62       | 57.18             | 22.63       | 1.6                             | 32.76  | 2.35   | 9.34  | 1.5   | 1.42      | 4.39    | 6.31     |      |
| TA-AML3_AML5  | 12.78   | 8.33                     | 8.48                                           | 4.37                                                      | 3.62          | 4.58                                    | 8.4                                       | 10.09 | 17.28            | 9.06             | 14.15           | 5.2         | 4.71                     | 1.09                   | 11.32                 | 13.13        | 8.31       | -0.03           | -0.12              | 392.26           | 732.21       | 28.73             | 17.89       | 0.6                             | 79.11  | 2.17   | 6.05  | 2.87  | 11.1      | 6.8     | X        |      |
| TA-AML3_AML3  | 5.29    | 2.78                     | 2.68                                           | 1.85                                                      | 0.86          | 2.06                                    | 6.35                                      | 12.92 | 23.49            | 8.03             | 18.57           | 4.33        | 1.3                      | 1                      | 4.84                  | 17.12        | 0.47       | -0.08           | -0.1               | 1163.66          | 363.87       | 76.46             | 41.25       | 0.83                            | 67.24  | 1.87   | 15.74 | 3.97  | 5.86      | 4.44    | 12.36    |      |
| TA-AML2_AML4  | 6.54    | 2.61                     | 2.26                                           | 2.19                                                      | 1.07          | 2.22                                    | 2.9                                       | 5.57  | 7.49             | 4.23             | 7.17            | 3.75        | 2.77                     | 0.68                   | 4.79                  | 6.25         | 4.83       | -0.14           | -0.14              | 1270.08          | 423.74       | 72.27             | 9.43        | 0.78                            | 52.95  | 2.36   | 4.35  | 1.55  | 4.7       | 3.81    | 11.08    |      |
| TA-AML4_AML1  | 10.64   | 8.58                     | 8.71                                           | 2.45                                                      | 0.93          | 2.73                                    | 8.73                                      | 8.17  | 9.57             | 3.84             | 11.66           | 8.51        | 3.24                     | 1.48                   | 8.55                  | 9.49         | 0.86       | -0.17           | -0.13              | 379.3            | 828.31       | 52.67             | 6.98        | 0.85                            | 51.05  | 1.86   | 6.84  | 2.15  | 9.06      | 4.09    | 3.55     |      |
| TA-AML1_AML22 | 18.18   | 12.12                    | 12.55                                          | 11.51                                                     | 11.22         | 11.57                                   | 12.14                                     | 16.99 | 15.41            | 13.11            | 20.16           | 14.19       | 11.86                    | 1.33                   | 3.65                  | 12.76        | 9.17       | 0               | -0.02              | 828.86           | 907.78       | 79.63             | 13.94       | 0.84                            | 5.44   | 2.12   | 15.63 | 14.54 | 2.31      | 5.17    | 65.9     |      |
| TA-AML3_AML7  | 2.03    | 4.47                     | 4.46                                           | 3.12                                                      | 2.89          | 3.21                                    | 5.56                                      | 22.25 | 7.46             | 0.62             | 9.26            | 4.48        | 1.83                     | 0.84                   | 1.92                  | 12.17        | 1.54       | 0.65            | 0.56               | 426.12           | 315.12       | 75.58             | 6.72        | 0.55                            | 25.17  | 3.23   | 8.66  | 8.16  | 7.05      | 5.61    | X        |      |
| TA-AML1_AML9  | 1.58    | 6.21                     | 6                                              | 4.95                                                      | 5.07          | 4.92                                    | 6.2                                       | 6.9   | 11.55            | 2.77             | 8.53            | 3.96        | 0.68                     | 0.47                   | 0.25                  | 1.82         | 0.25       | 0.19            | -0.03              | 381.56           | 947.46       | 56.66             | 25.65       | 1.44                            | 20.66  | 2.36   | 5.2   | 2.3   | 0.48      | 2.53    | 14.18    |      |
| TA-AML2_AML20 | 7.8     | 13                       | 12.82                                          | 7.2                                                       | 4.37          | 7.71                                    | 15.62                                     | 10.41 | 7.6              | 29.53            | 8.89            | 2.66        | 0.48                     | 0.18                   | 0.57                  | 7.89         | 0.69       | -0.02           | -0.21              | 572.95           | 744.25       | 51.57             | 22.15       | 2                               | 64.14  | 2.52   | 8.48  | 1.34  | 5.04      | 5.16    | 3.75     |      |
| TA-AML2_AML21 | 4.16    | 4.76                     | 4.7                                            | 4.05                                                      | 4.27          | 4.03                                    | 4.8                                       | 5.02  | 6.64             | 2.09             | 5.44            | 6.05        | 1.19                     | 0.27                   | 3.96                  | 1.7          | 0.8        | -0.13           | -0.16              | 575.01           | 670.34       | 56.34             | 0.71        | 1.19                            | 52.33  | 1.45   | 6.43  | 2.54  | 3.89      | 3.02    | 4.58     |      |
| TA-AML2_AML22 | 13.51   | 7.59                     | 7.59                                           | 6.27                                                      | 5.62          | 6.33                                    | 7.73                                      | 9.61  | 6.1              | 2.12             | 19.19           | 5.84        | 1.79                     | 0.9                    | 0.58                  | 9.11         | 1.68       | 0               | -0.09              | 1738.49          | 1013.43      | 64.54             | 14.74       | 0.45                            | 9.97   | 1.92   | 9.07  | 2.5   | 0.62      | 3.16    | X        |      |
| TA-AML2_AML23 | 1.78    | 4.29                     | 4.94                                           | 3.83                                                      | 3.11          | 3.95                                    | 4.51                                      | 11.83 | 9.87             | 5.89             | 9.25            | 5.04        | 2.06                     | 0.48                   | 0.8                   | 5.27         | 0.76       | -0.05           | -0.12              | 1158.66          | 670.19       | 80.39             | 8.2         | 0.59                            | 54.05  | 2.52   | 2.9   | 1.55  | 0.42      | 5.43    | 14.13    |      |
| TA-AML2_AML39 | 1.85    | 4                        | 4.09                                           | 1.53                                                      | 1.06          | 1.53                                    | 4.24                                      | 5.41  | 6.37             | 0.86             | 14.27           | 6.56        | 2.46                     | 0.85                   | 1.83                  | 4.52         | 0.75       | 0.14            | -0.12              | 342.11           | 618.86       | 68.48             | 8.32        | 0.74                            | 33.3   | 1.77   | 12.42 | 1.79  | 0.55      | 4.41    | 7.01     |      |
| TA-AML4_AML37 | 14.91   | 13.34                    | 12.87                                          | 11.19                                                     | 12.59         | 11.09                                   | 15.63                                     | 12.89 | 11.23            | 16.71            | 17.46           | 24.91       | 14.94                    | 0.53                   | 4.13                  | 12.85        | 1.84       | 0.91            | 0.43               | 808.06           | 993.43       | 42.85             | 10.58       | 0.36                            | 38.74  | 3.25   | 15.39 | 24.3  | 5.23      | 7.57    | 54.61    |      |
| TA-AML4_AML38 | 14.93   | 5.93                     | 5.09                                           | 2.34                                                      | 2.77          | 2.29                                    | 6.06                                      | 3.27  | 3.37             | 3.38             | 11.85           | 7.98        | 1.65                     | 0.63                   | 0.56                  | 4.52         | 0.5        | 0.42            | -0.05              | 1563.99          | 606.45       | 57.7              | 11.53       | 1.09                            | 43.71  | 3.26   | 2.2   | 4.33  | 1.27      | 9.92    | 850.38   |      |
| TA-AML4_AML40 | 6.51    | 5.96                     | 5.15                                           | 4.5                                                       | 4.96          | 4.45                                    | 8.42                                      | 8.85  | 13.65            | 2.03             | 17.31           | 16          | 2.19                     | 0.9                    | 0.88                  | 25.31        | 2.32       | 0.94            | 0.85               | 457.33           | 481.68       | 52.46             | 27.1        | 9.83                            | 35.21  | 2.82   | 8.98  | 11.3  | 1.52      | 3.45    | 2.97     |      |
| TA-AML3_AML6  | 1.7     | 2.18                     | 2.22                                           | 1.9                                                       | 2.28          | 1.88                                    | 2.91                                      | 2.65  | 2.36             | 1.48             | 2.7             | 1.18        | 0.57                     | 0.19                   | 0.27                  | 2.77         | 0.32       | 0.32            | 0.04               | 384.45           | 331.22       | 53.34             | 5.2         | 0.81                            | 43.06  | 2.82   | 3.06  | 3.13  | 0.51      | 3.46    | 8.09     |      |
| TA-AML2_AML31 | 10.44   | 7.61                     | 7.62                                           | 6.98                                                      | 5.16          | 7.04                                    | 7.73                                      | 12.43 | 9.2              | 7                | 10.97           | 8.99        | 1.68                     | 2.69                   | 0.65                  | 8.41         | 7.59       | 0.03            | -0.09              | 738.83           | 392.63       | 33.96             | 15.58       | 1.28                            | 61.22  | 2.88   | 4.77  | 10.63 | 0.03      | 5.38    | 4.83     |      |
| TA-AML4_AML8  | 2.66    | 2.99                     | 3.02                                           | 3.02                                                      | 2.96          | 3.36                                    | 2.28                                      | 6.09  | 16.72            | 0.03             | 9.29            | 2.69        | 1.9                      | 1.19                   | 0.82                  | 13.28        | 1.55       | 0.22            | 0                  | 1149.84          | 954.12       | 24.55             | 28.79       | 2.19                            | 24.02  | 2.76   | 7.89  | 3.21  | 1.83      | 4.12    | 8.66     |      |
| TA-AML1_AML13 | 0.14    | 1.36                     | 1.22                                           | 1.1                                                       | 2.94          | 1.03                                    | 2.07                                      | 1.72  | 0.72             | 0.33             | 2.16            | 0.91        | 0                        | 0                      | -0.11                 | 0.64         | 0          | -0.13           | 0                  | 838.94           | 325.57       | 59.89             | 1.79        | 1.22                            | 1.82   | 0.71   | 2.42  | 0     | 0         | 1.52    | 0.8      |      |
| TA-AML3_AML36 | 1.17    | 1.93                     | 1.86                                           | 1.72                                                      | 1.78          | 1.72                                    | 5.05                                      | 3.91  | 3.61             | 1.13             | 6.84            | 2.11        | 0.94                     | 0.82                   | 0.01                  | 4.9          | 0.72       | -0.21           | -0.19              | 729.49           | 327.12       | 56.94             | 15.41       | 0.31                            | 7.42   | 0.77   | 0.82  | -0.6  | -0.2      | 0.64    | 0.67     |      |
| TA-AML2_AML33 | 2.08    | 5.21                     | 5.16                                           | 4.55                                                      | 5.62          | 4.35                                    | 5.64                                      | 10.57 | 4.96             | -0.01            | 15.7            | 8.68        | 2.68                     | 1                      | 0.23                  | 4.61         | 0.78       | -0.03           | -0.08              | 894.11           | 748.36       | 44.19             | 0.52        | 1.14                            | 3.95   | 1.87   | 9.68  | 3.01  | 0.84      | 3.46    | 5.82     |      |
| TA-AML2_AML42 | -0.05   | 2.1                      | 0.74                                           | 0.69                                                      | 0.28          | 0.78                                    | 5.36                                      | 3.42  | 0.83             | -0.03            | 2.68            | 1.3         | 0.01                     | -0.09                  | -0.12                 | 0.97         | -0.19      | -0.27           | -0.21              | 651.79           | 312.28       | 59.26             | 0.47        | 0.35                            | 0.77   | 0.75   | 1.97  | 15.45 | 0.66      | 0.69    | 1.56     |      |
| TA-AML4_AML14 | 0.73    | 0.96                     | 0.93                                           | 0.89                                                      | 2.25          | 0.72                                    | 2.29                                      | 1.66  | 0.93             | -0.06            | 0.46            | 0.92        | -0.18                    | 0.36                   | -0.08                 | 1.96         | -0.36      | -0.38           | -0.31              | 707.06           | 454.51       | 59.92             | 0.11        | 0.16                            | 14.08  | 1.08   | 4.77  | 2.7   | 1.59      | 1.78    | 2.58     |      |
| TA-AML4_AML15 | 5.26    | 5.25                     | 5.31                                           | 4.87                                                      | 6.85          | 4.57                                    | 5.88                                      | 8.2   | 14.59            | 5.42             | 10.6            | 8.75        | 0.98                     | 0.21                   | 3.99                  | 12.83        | 0.31       | -0.2            | -0.09              | 833.97           | 228.47       | 51.4              | 26.13       | 1.11                            | 28.73  | 1.87   | 4.11  | 0.11  | -0.05     | 2.53    | 1.51     |      |
| TA-AML2_AML22 | 5.48    | 7.39                     | 7.36                                           | 5.77                                                      | 5.93          | 5.77                                    | 7.49                                      | 5.27  | 3.6              | 3.47             | 5.89            | 4.3         | 1.45                     | 0.48                   | 0.67                  | 4.51         | 0.5        | -0.04           | -0.17              | 1419.23          | 494.08       | 57.39             | 8.27        | 1.78                            | 8.25   | 3.56   | 5.48  | 4.5   | 0         | 4.63    | 6.95     |      |
| TA-AML1_AML18 | 10.4    | 6.01                     | 6.08                                           | 3.35                                                      | 2.37          | 3.62                                    | 7.12                                      | 6.56  | 5.07             | 0.39             | 12.22           | 10.93       | 2.07                     | 0.53                   | 0.18                  | 7.89         | 2.15       | -0.04           | -0.07              | 552.03           | 448.16       | 65.44             | 0.34        | 1.03                            | 3.56   | 2.08   | 19.79 | 3.54  | -0.02     | 4.83    | 21.6     |      |
| TA-AML1_AML4  | 6.82    | 10.92                    | 10.58                                          | 9.84                                                      | 12.5          | 9.16                                    | 14.07                                     | 13.12 | 13.18            | -0.01            | 14.38           | 7.38        | 2.3                      | 0.92                   | 1.21                  | 13.41        | 2.52       | 0.49            | -0.18              | 824.99           | 896.94       | 48.07             | 2.36        | 0.1                             | 24.7   | 1.7    | 9.64  | 7.35  | 0.96      | 3.03    | 4.67     |      |
| TA-AML2_AML19 | 12.16   | 15.28                    | 15.6                                           | 11.56                                                     | 12.04         | 11.48                                   | 17.43                                     | 16.55 | 12.96            | 3.82             | 18.54           | 18.63       | 2.53                     | 1.07                   | 1.04                  | 4.88         | 5.15       | 0.47            | 0.01               | 491.76           | 529.46       | 38.85             | 21.25       | 2.16                            | 41.22  | 2.01   | 3.36  | 2.15  | 0.18      | 2.67    | 3.7      |      |
| TA-AML2_AML29 | 9.3     | 7.48                     | 7.06                                           | 4.36                                                      | 5.15          | 4.18                                    | 9.43                                      | 9.94  | 4.01             | 3.2              | 19.88           | 4.75        | 0.74                     | 1.54                   | 1.26                  | 21.11        | 1.88       | 0.81            | -0.08              | 1172.27          | 862.79       | 65.78             | 0.24        | 0.63                            | 50.26  | 2.41   | 16.49 | 1.99  | 1.39      | 4.01    | 2.43     |      |
| TA-AML2_AML41 | 0.66    | 2.69                     | 2.34                                           | 2.04                                                      | 2.91          | 1.53                                    | 5.22                                      | 3.26  | 2.53             | 0.22             | 0.34            | 0.01        | -0.1                     | -0.13                  | -0.3                  | 1.78         | -0.14      | -0.22           | -0.24              | 845.48           | 1169.08      | 57.12             | 19.1        | 2.09                            | 18.11  | 2.33   | 3.19  | 0.62  | 4.34      | 1.79    | 1.67     |      |
| TA-AML4_AML25 | 1.46    | 1.65                     | 2.23                                           | 1.94                                                      | 2.1           | 1.85                                    |                                           |       |                  |                  |                 |             |                          |                        |                       |              |            |                 |                    |                  |              |                   |             |                                 |        |        |       |       |           |         |          |      |

CD235 Median
Un gated CD34+CD38 ow CD49ARneg CD34+CD38 hi CD33negCD3 4+CD38low HSC- 90hi33neg MPP- 90low33ne g CMP- CD34+CD38 hi ovCD33mid GMP 34negCD38 +Undiff 34neg38neg Myelo/Mon oblast ProMonocyte CD14neg Mono CD14+ Mono 11b+DRneg ProMyelocyte Myelocytes Meta- myelocytes Mature Granulocyte Pro- erythroblast Erythroblast Late Erythroblast Pre-B Cells Mature B cells CD20+CD19+ Plasma T Cell pDC mDC Basophil NK Cell Platelet

|               | CD47 Median |                          |                                                      |                         |                   |                        |                                                            |        |           |            |                     |             |                 |       |                   |              |            |                     |                       |                      |              |                      |             |                                 |        |        |        |        |          |         |          |        |  |  |
|---------------|-------------|--------------------------|------------------------------------------------------|-------------------------|-------------------|------------------------|------------------------------------------------------------|--------|-----------|------------|---------------------|-------------|-----------------|-------|-------------------|--------------|------------|---------------------|-----------------------|----------------------|--------------|----------------------|-------------|---------------------------------|--------|--------|--------|--------|----------|---------|----------|--------|--|--|
|               | Ungated     | CD34+CD38 <sup>low</sup> | CD49bAreg<br>CD34 <sup>low</sup> CD38 <sup>low</sup> | CD33negCD3 <sup>4</sup> | HSC-<br>90hi13neg | MPP-<br>90low33ne<br>g | CMF-<br>CD34 <sup>low</sup> CD38 <sup>low</sup><br>CD33mid | GMP    | 34negCD38 | 34neg38neg | Myelo/Mon<br>oblast | ProMonocyte | CD14neg<br>Mono | CD14+ | 11b+DRneg<br>Mono | ProMyelocyte | Myelocytes | Meta-<br>myelocytes | Mature<br>Granulocyte | Pro-<br>erythroblast | Erythroblast | Late<br>Erythroblast | Pre-B Cells | Mature B<br>cells<br>CD20+CD19+ | Plasma | T Cell | pDC    | mDC    | Basophil | NK Cell | Platelet |        |  |  |
| TA-AML1_AML26 | 74.99       | 38.95                    | 37.98                                                | 38.05                   | 35.62             | 39.34                  | 40.06                                                      | 40.11  | 37.62     | 23.75      | 39.42               | 61.91       | 52.19           | 43.43 | 80.64             | 101.8        | 105.93     | 95.38               | 82.39                 | 12.61                | 15.92        | 12.38                | 51.7        | 33.82                           | 59.1   | 65.22  | 30.83  | 74.74  | 67.59    | 56.88   | 853.85   |        |  |  |
| TA-AML3_AML35 | 54.86       | 26.85                    | 26.5                                                 | 25.42                   | 28.42             | 25.03                  | 33.6                                                       | 37.99  | 24.35     | 2.39       | 38.35               | 65.13       | 105.09          | 52.93 | 90.7              | 96.27        | 136.02     | 140.08              | 92.23                 | 39.57                | 15.52        | 10.7                 | 65.85       | 29.23                           | 62.61  | 63.61  | 37.3   | 203    | 64.18    | 72.26   | 731.67   |        |  |  |
| TA-AML3_AML5  | 48.03       | 35.91                    | 35.49                                                | 35.92                   | 35.54             | 36.17                  | 39.41                                                      | 39.93  | 71.51     | 58.17      | 41.82               | 55.18       | 59.58           | 59.45 | 68.43             | 53.86        | 68.07      | 66.7                | 53.97                 | 20.74                | 11.84        | 7.11                 | 87.07       | 27.61                           | 85.46  | 58.47  | 43.51  | 88.79  | 89.14    | 34.21   | 121.01   |        |  |  |
| TA-AML1_AML10 | 65.58       | 65.92                    | 65.68                                                | 66.22                   | 65.87             | 66.36                  | 65.85                                                      | 65.87  | 48.08     | 69.89      | 61.56               | 67.08       | 57.33           | 62.45 | 110.47            | 89.96        | 92.34      | 67.99               | 88.61                 | 25.07                | 59.96        | 52.68                | 22.44       | 85.31                           | 39.91  | 66.21  | 55.82  | 92.45  | 53.7     | 815.91  |          |        |  |  |
| TA-AML2_AML32 | 72.46       | 66.66                    | 66.74                                                | 65.9                    | 63.32             | 66.48                  | 68.22                                                      | 83.09  | 59.72     | 1.88       | 84.15               | 49.44       | 59.69           | 45.57 | 94.67             | 95.58        | 96.65      | 95.3                | 93.55                 | 14.77                | 7.53         | 10.3                 | 41.83       | 31.03                           | 50.34  | 46.46  | 71.24  | 49.86  | 112.75   | 33.12   | 100.81   |        |  |  |
| TA-AML3_APL5  | 68.15       | 68.5                     | 67.76                                                | 48.57                   | 38.85             | 49.76                  | 69.06                                                      | 66.27  | 67.15     | 42.18      | 69.46               | 69.71       | 60.23           | 40.96 | 68.58             | 77.14        | 87.72      | 82.5                | 79.72                 | 57.91                | 18.76        | 64.41                | 109.69      | 19.86                           | 87.01  | 35.43  | 142.91 | 37.29  | 81.14    | 52.61   | X        |        |  |  |
| TA-AML3_APL3  | 88.93       | 51.11                    | 47.55                                                | 34.48                   | 32.63             | 35.28                  | 94.84                                                      | 58.84  | 64        | 85.68      | 161.61              | 35.23       | 31.33           | 31.98 | 118.28            | 176.63       | 68.44      | 59.85               | 57.55                 | 33.91                | 18.47        | 15.22                | 113.02      | 35.29                           | 55.96  | 46.44  | 67.88  | 65.28  | 153.06   | 43.06   | 224.64   |        |  |  |
| TA-AML2_APL4  | 66.86       | 52.8                     | 47.67                                                | 43.48                   | 32.25             | 44.58                  | 59.78                                                      | 69.95  | 69.8      | 46.15      | 66.61               | 58.39       | 56.77           | 33.57 | 69.64             | 75.37        | 62.21      | 61.08               | 73.78                 | 14.24                | 18.95        | 17.34                | 79.52       | 18.93                           | 49.7   | 46.24  | 95.55  | 27.69  | 76.21    | 22.77   | 120.47   |        |  |  |
| TA-AML4_APL1  | 62.6        | 55.26                    | 55.72                                                | 34.11                   | 21.64             | 35.95                  | 55.76                                                      | 48.16  | 50.11     | 16.53      | 65.16               | 53.05       | 42.5            | 37.08 | 66.68             | 68.88        | 61.82      | 54.79               | 59.91                 | 91.06                | 10.93        | 15.88                | 43.07       | 20.88                           | 52.82  | 29.66  | 58.08  | 42.41  | 73.26    | 30.43   | 300.99   |        |  |  |
| TA-AML1_AML27 | 64.01       | 66.63                    | 62.94                                                | 53.9                    | 48.62             | 55.08                  | 67.37                                                      | 49.28  | 40.59     | 53.08      | 64.67               | 68.08       | 87.88           | 49.32 | 94.33             | 106.34       | 88.25      | 80.16               | 73.7                  | 34.14                | 16.7         | 20.91                | 49.64       | 23.93                           | 89.06  | 61.63  | 91.01  | 64.38  | 109.15   | 43.14   | 547.66   |        |  |  |
| TA-AML3_AML7  | 47.59       | 60.68                    | 56.31                                                | 25.81                   | 31.03             | 25.61                  | 90.86                                                      | 36.12  | 55.46     | 13.01      | 67.6                | 46.84       | 43.35           | 42.41 | 45.02             | 102.51       | 66.45      | 108.91              | 126.48                | 43.05                | 17.32        | 15.69                | 53.26       | 19                              | 53.74  | 46.09  | 78.38  | 67.74  | 75.82    | 52.6    | X        |        |  |  |
| TA-AML3_AML9  | 48.54       | 62.32                    | 62.11                                                | 56.54                   | 59.96             | 55.9                   | 63.35                                                      | 78.12  | 42.66     | 20.83      | 64.25               | 32.59       | 24.88           | 28.04 | 51.3              | 74.01        | 45.85      | 58.4                | 34.16                 | 33.33                | 16.98        | 12.98                | 51.31       | 31.29                           | 55.65  | 44.02  | 70.48  | 54.2   | 89.2     | 32.95   | 267.85   |        |  |  |
| TA-AML2_AML2  | 26.33       | 45.01                    | 42.49                                                | 32.68                   | 32.59             | 32.84                  | 52.24                                                      | 26.33  | 18.17     | 11.28      | 29.6                | 28.09       | 27.29           | 26.54 | 52.63             | 55.5         | 49.55      | 57.16               | 38.57                 | 21.6                 | 10.96        | 13.41                | 59.66       | 24.68                           | 63.28  | 32.11  | 35.02  | 41.64  | 94.56    | 32.77   | 24.79    |        |  |  |
| TA-AML2_AML21 | 34.13       | 33.71                    | 32.62                                                | 31.14                   | 31.81             | 31.08                  | 33.78                                                      | 30.95  | 27.68     | 14.81      | 37.19               | 41.71       | 27.87           | 24.56 | 42.61             | 83.36        | 59.23      | 56.04               | 50.04                 | 17.02                | 9.22         | 10.78                | 39.19       | 38.67                           | 42.66  | 24.13  | 26.9   | 67.55  | 15.56    | 24.49   | 43.92    |        |  |  |
| TA-AML2_AML25 | 39.41       | 42.51                    | 42.17                                                | 43.45                   | 44.07             | 43.24                  | 42.47                                                      | 27.32  | 31.93     | 22.44      | 40.37               | 21.47       | 21.89           | 24.66 | 52.19             | 52.81        | 44.42      | 58.95               | 51.36                 | 8.34                 | 6.31         | 9                    | 30.46       | 22.83                           | 108.54 | 45.25  | 47.14  | 61.33  | 56.59    | 37.51   | X        |        |  |  |
| TA-AML2_AML30 | 61.06       | 93.32                    | 83.69                                                | 67.83                   | 49.63             | 70.05                  | 94.26                                                      | 47.56  | 46.66     | 39.33      | 68.05               | 73.28       | 56.93           | 56.18 | 59.92             | 105.37       | 74.16      | 65.61               | 62.73                 | 22.41                | 22.97        | 23.28                | 62.37       | 19.78                           | 78.91  | 40.4   | 124.43 | 65.46  | 82.28    | 41.09   | 258.31   |        |  |  |
| TA-AML2_AML39 | 50.33       | 62.92                    | 50.13                                                | 19.98                   | 21.64             | 19.8                   | 65.06                                                      | 75.4   | 68.37     | 13.6       | 72.16               | 63.09       | 55.06           | 44.03 | 85.13             | 105.2        | 74.06      | 68.01               | 30.94                 | 36.53                | 26.75        | 13.7                 | 66.04       | 15.97                           | 89.66  | 34.97  | 79.89  | 51.45  | 78.84    | 49.2    | 344.1    |        |  |  |
| TA-AML4_AML37 | 115.38      | 134.94                   | 131                                                  | 123.36                  | 122.33            | 123.37                 | 145.08                                                     | 141.27 | 121.76    | 91.33      | 167.38              | 167.36      | 164.73          | 61.6  | 83.43             | 105.17       | 101.95     | 154.85              | 101.94                | 71.44                | 25.19        | 38.83                | 88.8        | 18.87                           | 101.91 | 55.7   | 207.57 | 117.10 | 137.36   | 132.13  | 696.5    |        |  |  |
| TA-AML4_AML38 | 35.58       | 65.54                    | 57.94                                                | 41.86                   | 30.17             | 41.93                  | 66.08                                                      | 32.74  | 30.82     | 10.59      | 54.65               | 67.36       | 38.5            | 41.94 | 66.09             | 107.56       | 61.25      | 77.35               | 42.02                 | 16.3                 | 12.57        | 14                   | 52.6        | 24.63                           | 46.66  | 35.57  | 83.63  | 86.23  | 110.04   | 62.3    | 21.62    |        |  |  |
| TA-AML4_AML40 | 63.74       | 59.43                    | 51.62                                                | 49.89                   | 49.36             | 49.3                   | 64.88                                                      | 62.64  | 63.43     | 28.38      | 89.49               | 89.49       | 87.19           | 33.19 | 28.73             | 37.21        | 188.01     | 71.58               | 74.79                 | 76.84                | 24.34        | 22.39                | 22.35       | 69.46                           | 53.49  | 52.17  | 51.61  | 112.56 | 79.17    | 148.26  | 49.79    | 148.67 |  |  |
| TA-AML3_AML6  | 64.7        | 61.44                    | 61.35                                                | 58.91                   | 48.97             | 60.73                  | 63.81                                                      | 80.56  | 84.05     | 45.58      | 96.69               | 22.17       | 27.96           | 26.88 | 30.39             | 91.21        | 27.21      | 40.56               | 32.82                 | 81.1                 | 20.34        | 13.94                | 88.18       | 23.6                            | 92.96  | 60.26  | 102.31 | 112.97 | 61.94    | 40.4    | 423.71   |        |  |  |
| TA-AML2_AML31 | 57.42       | 53.58                    | 53.57                                                | 53.22                   | 50.17             | 53.43                  | 53.62                                                      | 76.22  | 51.63     | 40.37      | 58.96               | 52.39       | 35.82           | 55.35 | 78.86             | 62.51        | 57.09      | 68                  | 64.26                 | 62.26                | 60.95        | 37.3                 | 63.23       | 26.7                            | 96.1   | 33.63  | 58.45  | 61.96  | 73.49    | 21.94   | 72.98    |        |  |  |
| TA-AML4_AML8  | 62.42       | 25.42                    | 25                                                   | 24.63                   | 27.81             | 22.58                  | 25.66                                                      | 25.75  | 56.99     | 18.27      | 34.17               | 37.72       | 50.25           | 41.94 | 37.3              | 94.31        | 63.91      | 62.14               | 58.04                 | 15.34                | 8.85         | 18.95                | 69.46       | 25.69                           | 45.84  | 52.06  | 54.46  | 57.76  | 122.5    | 36.94   | 483.08   |        |  |  |
| TA-AML1_AML13 | 41          | 41.35                    | 40.23                                                | 35.84                   | 42.07             | 34.93                  | 50.16                                                      | 53.35  | 54.39     | 39.22      | 49.1                | 21.31       | 19.41           | 19.63 | 17.57             | 66.21        | 55.93      | 44.84               | 49.07                 | 37.13                | 26.69        | 38.52                | 81.02       | 27.37                           | 64     | 61.02  | 35.54  | 17.09  | 200.32   | 42.59   | 530.2    |        |  |  |
| TA-AML3_AML36 | 36.62       | 21.04                    | 20.55                                                | 19.98                   | 21.56             | 19.94                  | 40.64                                                      | 27.15  | 32.59     | 23.55      | 49.64               | 61.63       | 38.67           | 25.16 | 40.45             | 84.11        | 71.65      | 62.22               | 60.32                 | 13.17                | 13.55        | 10.92                | 44.41       | 23.2                            | 35.53  | 40.85  | 36.82  | 30.8   | 29.77    | 42.4    | 277.86   |        |  |  |
| TA-AML3_AML33 | 68.77       | 37.93                    | 36.31                                                | 35.7                    | 40.09             | 33.72                  | 40.09                                                      | 63.87  | 46.64     | 0.71       | 87.58               | 60.69       | 35.53           | 36.27 | 58.45             | 85.56        | 69.39      | 80.4                | 71.67                 | 25.62                | 8.72         | 6.71                 | 37.77       | 47.3                            | 74.82  | 51.47  | 60.3   | 68.32  | 39.52    | 47.61   | 262.68   |        |  |  |
| TA-AML2_AML42 | 39.31       | 31.73                    | 25.77                                                | 21.82                   | 23.34             | 20.38                  | 57.97                                                      | 36.7   | 22.97     | 19.97      | 31.57               | 32.81       | 24.16           | 27.87 | 37.07             | 56.87        | 50.07      | 60.46               | 60.1                  | 11.38                | 15.73        | 13.92                | 49.42       | 19.84                           | 35.52  | 39.9   | 35.4   | 77.1   | 115.78   | 31.42   | 167.93   |        |  |  |
| TA-AML4_AML4  | 19.91       | 13.47                    | 13.18                                                | 13.06                   | 18.9              | 11.9                   | 20.27                                                      | 19.22  | 16.55     | 10.11      | 15.36               | 20.48       | 12.48           | 20.68 | 16.31             | 31.31        | 19.88      | 21.39               | 28.32                 | 10.55                | 8.54         | 6.24                 | 32.76       | 29.97                           | 20.41  | 25.91  | 42.04  | 45.95  | 61.1     | 22.73   | 127.44   |        |  |  |
| TA-AML4_AML14 | 26.91       | 19.05                    | 18.54                                                | 18.91                   | 26.64             | 18.33                  | 19.64                                                      | 19.85  | 18.7      | 12.85      | 26.22               | 33.28       | 41.87           | 27.48 | 35.63             | 41.99        | 39.38      | 67.66               | 77.31                 | 17.27                | 19.73        | 21.59                | 40.36       | 30.2                            | 33.3   | 37.37  | 43.05  | 49.56  | 19.64    | 166.68  |          |        |  |  |
| TA-AML2_AML22 | 28.79       | 36.92                    | 36.79                                                | 29.81                   | 31.18             | 29.57                  | 37.46                                                      | 26.64  | 21.6      | 16.13      | 28.28               | 29.63       | 32.05           | 35.48 | 90.6              | 77.83        | 74.42      | 79.83               | 58.46                 | 27.54                | 11.94        | 9.39                 | 52.5        | 32.33                           | 99.53  | 32.26  | 28.07  | 31.49  | 52.21    | 34.4    | 564.47   |        |  |  |
| TA-AML1_AML18 | 59.67       | 31.39                    | 31.2                                                 | 32.63                   | 54.68             | 28.77                  | 31.39                                                      | 43.64  | 48.41     | 5.58       | 62.39               | 59.43       | 38.1            | 34.5  | 43.08             | 61.9         | 66.33      | 66.03               | 59.26                 | 25.92                | 15.25        | 11.75                | 37.77       | 24.39                           | 128.68 | 48.89  | 75.3   | 72.1   | 94.73    | 46.41   | 269.2    |        |  |  |
| TA-AML3_AML4  | 30.07       | 20.69                    | 19.92                                                | 19.15                   | 23.1              | 17.92                  | 25.13                                                      | 20.1   | 35.38     | 3.58       | 25.75               | 20.44       | 17.31           | 17.78 | 38.85             | 53.23        | 48.17      | 40.73               | 44.3                  | 34.42                | 8.9          | 14.29                | 39.92       | 27.64                           | 54.64  | 43.32  | 24.43  | 75.22  | 69.28    | 42.67   | 146.04   |        |  |  |
| TA-AML2_AML19 | 55.98       | 51.53                    | 51.22                                                | 44.99                   | 42.89             | 45.46                  | 54.63                                                      | 55.17  | 27.87     | 24.83      | 72.75               | 75.79       | 74.54           | 49.21 | 77.75             | 117.16       | 92.12      | 91.13               | 93.92                 | 62.62                | 21.52        | 14.32                | 45.25       | 28.48                           | 51.11  | 37.29  | 81.63  | 55.07  | 102.62   | 33.74   | 675.24   |        |  |  |
| TA-AML2_AML29 | 26.81       | 23.26                    | 22.52                                                | 20.08                   | 22.75             | 19.56                  | 24.67                                                      | 21.79  | 22.79     | 17.47      | 29.36               | 34.41       | 42.64           | 40.59 | 61.48             | 42.59        | 76.36      | 91.51               | 65.87                 | 19.78                | 7.61         | 12.69                | 28.58       | 25.1                            | 41.47  | 51.23  | 37.98  | 29.54  | 94.74    | 31.8    | 141.27   |        |  |  |
| TA-AML2_AML41 | 35.42       | 37.66                    | 34.66                                                | 32.2                    | 38.11             | 28.77                  | 49.46                                                      | 29.65  | 27.64     | 26.65      | 28.21               | 30.12       | 37.24           | 35.16 | 28.39             | 56.37        | 44.89      | 51.69               | 45.73                 | 13.25                | 6.12         | 9.34                 | 52.3        | 28.24                           | 43.46  | 47.55  | 54.91  | 129.14 | 26.85    | 294.55  |          |        |  |  |
| TA-AML4_AML25 | 57.91       | 22.77                    | 18.65                                                | 17.44                   | 20.44             | 15.14                  | 52.83                                                      | 20.87  | 28.48     | 24.27      | 36.35               | 33.86       | 30.7            | 37.23 | 46.51             | 86.12        | 63.93      | 92.32               | 98.23                 | 26.33                | 9.61         | 12.57                | 69.71       | 25.45                           | 46.82  | 52.87  | 56.01  | 39.09  | 91.55    | 43.31   | 143.54   |        |  |  |
| TA-AML1_N1-1  | 52.61       | 51.15                    | 44.0                                                 |                         |                   |                        |                                                            |        |           |            |                     |             |                 |       |                   |              |            |                     |                       |                      |              |                      |             |                                 |        |        |        |        |          |         |          |        |  |  |

**CD34 Median**

|               | Ungated | CD34+CD38 <sup>low</sup> |        | CD49R <sup>neg</sup> CD34 <sup>int</sup> CD38 <sup>low</sup> |        | CD3 <sup>neg</sup> CD3 <sup>4</sup> |        | HSC-90hi13 <sup>neg</sup> | MPP-90low33 <sup>neg</sup> | CMP-CD34 <sup>int</sup> CD3 <sup>mid</sup> |        | GMP    | 34 <sup>neg</sup> CD38 <sup>+</sup> Undiff | 34 <sup>neg</sup> 38 <sup>neg</sup> Undiff | Myelo/Mon | ProMono | CD14 <sup>+</sup> Mono | CD14 <sup>+</sup> Mono | 11b+DR <sup>neg</sup> | ProMyelocyte | Myelocytes | Meta-myelocytes | Mature Granulocyte | Pro-erythroblast | Erythroblast | Late Erythroblast | Pre-B Cells |       | Mature B cells CD20 <sup>+</sup> CD19 <sup>+</sup> | Plasma | T Cell | pDC  | mDC  | Basophil | NK Cell | Platelet |
|---------------|---------|--------------------------|--------|--------------------------------------------------------------|--------|-------------------------------------|--------|---------------------------|----------------------------|--------------------------------------------|--------|--------|--------------------------------------------|--------------------------------------------|-----------|---------|------------------------|------------------------|-----------------------|--------------|------------|-----------------|--------------------|------------------|--------------|-------------------|-------------|-------|----------------------------------------------------|--------|--------|------|------|----------|---------|----------|
|               |         | ow                       | ow     | ow                                                           | ow     | ow                                  | ow     |                           |                            | ow                                         | ow     |        |                                            |                                            |           |         |                        |                        |                       |              |            |                 |                    |                  |              |                   | ow          | ow    |                                                    |        |        |      |      |          |         |          |
| TA-AML1_AML26 | 2.67    | 294.2                    | 299.35 | 306.31                                                       | 346.24 | 286.03                              | 257.83 | 376.33                    | 6.81                       | 2.84                                       | 149.87 | 7.91   | 6.08                                       | 4.96                                       | 4.94      | 2.6     | 1.73                   | 1.44                   | 1.58                  | 1.1          | 0.75       | 0.8             | 5.14               | 2.65             | 5.87         | 1.71              | 21.45       | 3.66  | 3.66                                               | 2.1    | 16.48  |      |      |          |         |          |
| TA-AML3_AML35 | 13.64   | 121.39                   | 123.83 | 129.6                                                        | 171.07 | 119.17                              | 91.7   | 323.4                     | 8.51                       | 3.99                                       | 108.96 | 6.17   | 8.47                                       | 5.57                                       | 6.62      | 3.11    | 2.74                   | 3.27                   | 5.58                  | 0.78         | 0.81       | 6.24            | 1.94               | 8.68             | 1.46         | 25.16             | 6.01        | 6.78  | 1.91                                               | 191.03 |        |      |      |          |         |          |
| TA-AML3_AML5  | 5.87    | 744.9                    | 700.65 | 722.42                                                       | 783.25 | 739.03                              | 840.76 | 567.63                    | 4.5                        | 1.34                                       | 191.48 | 10.96  | 4.43                                       | 2.83                                       | 2.38      | 506.38  | 1.46                   | 1.67                   | 1.74                  | 2.58         | 0.85       | -0.15           | 3.47               | 0.81             | 5.6          | 0.41              | 54.35       | 0.8   | 5.92                                               | 0.89   | 3.47   |      |      |          |         |          |
| TA-AML1_AML10 | 56.97   | 257                      | 253.66 | 245.08                                                       | 281.21 | 230.22                              | 262.94 | 112.41                    | 4.5                        | 3.3                                        | 93.7   | 4.12   | 3.2                                        | 2.69                                       | 2.41      | 7.24    | 3.27                   | 2.86                   | 2.74                  | 2.92         | 0.76       | 11.77           | 6.11               | 1.97             | 8.33         | 1.3               | 9.3         | 2.35  | 2.77                                               | 2.3    | 3.17   |      |      |          |         |          |
| TA-AML2_AML32 | 133.97  | 179.88                   | 179.82 | 189.3                                                        | 194.09 | 188.21                              | 165.21 | 165.87                    | 6.01                       | 1.07                                       | 141.6  | 10.92  | 3.54                                       | 3.54                                       | 2.7       | 2.7     | 1.44                   | 1.79                   | 2.56                  | 0.2          | 0.35       | 0.83            | 2.09               | 0.59             | -0.16        | -0.2              | 4.75        | 1.12  | 6.66                                               | 0.52   | 52.56  | 3.84 | 2.04 | 0.98     | 232.38  |          |
| TA-AML3_APL5  | 3.08    | 67.87                    | 63.42  | 77.67                                                        | 103.51 | 74.23                               | 67.52  | 38.76                     | 1.28                       | 1.01                                       | 2.94   | 3.38   | 2.78                                       | 1.57                                       | 2.71      | 4.71    | 3.21                   | 3.21                   | 0.33                  | 0.43         | 2.57       | -0.09           | 0.67               | 0.39             | 0.14         | 1.2               | 0.24        | 0.95  | 0.44                                               | 2.68   | 1.78   | X    |      |          |         |          |
| TA-AML3_APL3  | 0.5     | 79.88                    | 79.88  | 89.14                                                        | 98.13  | 88.55                               | 57.96  | 49.09                     | 0.58                       | 0.43                                       | 0.73   | 0.52   | 0.5                                        | 0.45                                       | 0.63      | 0.6     | 0.26                   | 0.42                   | 0.55                  | 0.21         | -0.12      | -0.12           | -0.01              | 0.92             | 0.06         | 1.01              | -0.04       | 2.15  | 0.63                                               | 0.65   | 0.68   | 1.01 |      |          |         |          |
| TA-AML2_APL4  | 0.75    | 54.07                    | 57.1   | 59.6                                                         | 61.3   | 59.04                               | 46.4   | 19.93                     | 0.73                       | 0.62                                       | 0.81   | 1.48   | 1.1                                        | 0.87                                       | 0.77      | 1.33    | 0.99                   | 0.39                   | 0.39                  | -0.12        | -0.02      | 0.11            | 1.05               | 0.05             | 1.05         | -0.05             | 1.2         | 0.33  | 0.67                                               | 0.67   | 0.55   |      |      |          |         |          |
| TA-AML4_APL1  | 4.25    | 48.34                    | 48.06  | 68.82                                                        | 77.01  | 67.88                               | 48.03  | 25.19                     | 1.59                       | 0.43                                       | 5.04   | 7.56   | 2.12                                       | 1.44                                       | 1.79      | 6.56    | 0.56                   | 0.2                    | 0.2                   | 0.35         | 0.83       | -0.23           | -0.17              | 3.89             | -0.26        | 1.61              | 0.06        | 6.11  | 0.57                                               | 1.85   | 0.66   | 4.21 |      |          |         |          |
| TA-AML1_AML27 | 2.02    | 87.23                    | 80.62  | 86.71                                                        | 120.57 | 81.94                               | 87.09  | 24.57                     | 1.03                       | 1.16                                       | 1.69   | 3.54   | 3.63                                       | 1.04                                       | 1.32      | 2.06    | 1.24                   | 0.5                    | 0.61                  | 0            | -0.18      | -0.37           | 1.15               | 0.23             | 2.02         | 0.2               | 1.26        | 1.84  | 0.65                                               | 1.07   | 0.54   |      |      |          |         |          |
| TA-AML3_AML7  | 0.57    | 88.85                    | 93.88  | 170.04                                                       | 184.89 | 170.04                              | 49.54  | 84.68                     | 0.53                       | -0.11                                      | 0.67   | 0.47   | 0.48                                       | 0.62                                       | 0.6       | 0.65    | 0.49                   | 0.81                   | 1.31                  | 1.95         | -0.23      | -0.32           | 0.15               | -0.07            | 0.65         | -0.1              | -0.02       | 0.85  | 0.64                                               | 0.79   | X      |      |      |          |         |          |
| TA-AML3_AML9  | 0.82    | 101.13                   | 96.21  | 86.83                                                        | 113.55 | 83.79                               | 103.17 | 37.74                     | 1                          | 0.51                                       | 4.01   | 1.83   | 1.09                                       | 0.19                                       | 0.54      | 0.36    | 0.44                   | 0.51                   | 0.94                  | -0.21        | -0.23      | 0.75            | 0.08               | 0.92             | 0.01         | 2.64              | 0.33        | 0.24  | 1.01                                               | 0.55   |        |      |      |          |         |          |
| TA-AML2_AML20 | 5.05    | 269.31                   | 251.49 | 202.92                                                       | 168.54 | 218.85                              | 277.35 | 29.88                     | 1.58                       | 0.58                                       | 12.55  | 2      | 0.93                                       | 0.77                                       | 0.75      | 3.01    | 1.51                   | 0.74                   | 0.92                  | 0.36         | -0.09      | 0.29            | 1.69               | 0.4              | 2.69         | 0.15              | 7.02        | 0.69  | 0.43                                               | 1.24   | 1.27   |      |      |          |         |          |
| TA-AML2_AML21 | 50.43   | 163.14                   | 140.22 | 187.73                                                       | 222.68 | 182.93                              | 161.3  | 57.07                     | 3.65                       | 2.3                                        | 17.74  | 36.97  | 2.28                                       | 1.48                                       | 5.35      | 3.47    | 1.18                   | 0.65                   | 0.74                  | 1.5          | -0.18      | -0.01           | 1.51               | 0.79             | 2.73         | 0.28              | 6.38        | 0.73  | 2.12                                               | 0.93   | 1.21   |      |      |          |         |          |
| TA-AML2_AML22 | 20.03   | 130.24                   | 127.43 | 127.15                                                       | 152.92 | 123.34                              | 130.48 | 28.34                     | 2.81                       | 1.55                                       | 16.43  | 31.9   | 2.27                                       | 2.72                                       | 1.62      | 11.92   | 3                      | 2.55                   | 2.82                  | 0.55         | -0.16      | -0.08           | 4.3                | 0.67             | 3.58         | 0.5               | 5.86        | 2.07  | 1.04                                               | 1.48   | X      |      |      |          |         |          |
| TA-AML2_AML23 | 2.42    | 48.07                    | 44.56  | 50.36                                                        | 54.72  | 49.54                               | 47.96  | 28.1                      | 0.75                       | 0.88                                       | 1.53   | 3.64   | 1.16                                       | 3.71                                       | 1.07      | 0.79    | 0.72                   | 1.39                   | 1.48                  | 0.95         | -0.06      | -0.04           | 0.95               | 0.14             | 1.64         | 0.21              | 3.69        | 1.43  | -0.41                                              | 0.93   | 0.85   |      |      |          |         |          |
| TA-AML2_AML39 | 1.26    | 91.87                    | 69.8   | 65.42                                                        | 72.3   | 62.5                                | 94.03  | 127.15                    | 0.89                       | 0.49                                       | 1.55   | 2.01   | 1.4                                        | 1.3                                        | 0.7       | 0.94    | 0.82                   | 0.88                   | 1.27                  | 1.35         | 0.08       | 0.66            | 1.54               | 0.36             | 2.22         | 0.2               | 0.98        | 0.79  | -0.1                                               | 1.16   | 2.57   |      |      |          |         |          |
| TA-AML4_AML37 | 1.27    | 51.94                    | 51.22  | 50.49                                                        | 56.65  | 49.94                               | 52.88  | 26.68                     | 0.12                       | 0.7                                        | 0.95   | 1.87   | 0.52                                       | 1.11                                       | 0.66      | 1.33    | 2.35                   | 3.37                   | 4.43                  | -0.08        | -0.26      | -0.13           | 0.53               | -0.36            | 0.44         | -0.25             | 2.32        | 1.72  | 0.17                                               | 0.83   | 0.9    |      |      |          |         |          |
| TA-AML4_AML38 | -0.06   | 70.52                    | 59.08  | 49.98                                                        | 95.87  | 48.34                               | 70.98  | 16.85                     | -0.06                      | -0.23                                      | 0.36   | 2.14   | 0.3                                        | -0.1                                       | -0.03     | 0.3     | -0.05                  | 0.01                   | 0.04                  | -0.18        | -0.33      | -0.37           | -0.15              | -0.3             | 0.39         | -0.28             | 0.16        | 0     | -0.06                                              | 1.34   | -0.23  |      |      |          |         |          |
| TA-AML4_AML40 | -0.06   | 88.69                    | 82.86  | 87.88                                                        | 110.91 | 86.02                               | 83.58  | 34.36                     | -0.14                      | -0.24                                      | 0.42   | 1.18   | 0.22                                       | 0.13                                       | 0.54      | -0.04   | 0.26                   | 0.73                   | 0.1                   | -0.26        | -0.48      | -0.1            | -0.13              | 0.33             | -0.23        | -0.33             | 0.81        | -0.32 | 0.68                                               | -0.2   |        |      |      |          |         |          |
| TA-AML3_AML6  | 2.12    | 56.4                     | 56.29  | 57.36                                                        | 78.49  | 56.4                                | 54.11  | 24.11                     | 1.77                       | 1.55                                       | 1.93   | 2.05   | 2.4                                        | 2.15                                       | 1.98      | 3.73    | 1.22                   | 1.81                   | 1.1                   | 0            | -0.08      | -0.24           | 1.18               | -0.03            | 1.98         | 0                 | 1.26        | 1.68  | 0.44                                               | 1.61   | 2.49   |      |      |          |         |          |
| TA-AML2_AML31 | 0.93    | 37.12                    | 37.06  | 38                                                           | 42.55  | 37.5                                | 36.87  | 20.26                     | 0.52                       | 1.04                                       | 0.92   | 1.64   | 0.62                                       | 2.58                                       | 0.34      | 1.5     | 1.74                   | 0.39                   | 0.66                  | 0.23         | 0.58       | 0.78            | 0.75               | 0.08             | 1.01         | -0.1              | 0.71        | 1.28  | 1.15                                               | 0.51   | 0.71   |      |      |          |         |          |
| TA-AML4_AML8  | -0.05   | 203.59                   | 198.64 | 201.78                                                       | 253.82 | 160.32                              | 207.25 | 94.66                     | 0.41                       | -0.37                                      | 0.67   | 0.76   | 0.82                                       | 0.89                                       | 0.28      | 0.02    | -0.14                  | -0.11                  | 0.21                  | -0.17        | -0.31      | -0.36           | 0.46               | -0.05            | 0.17         | -0.28             | 0.68        | -0.03 | 0.9                                                | 1.01   | 0.41   |      |      |          |         |          |
| TA-AML1_AML13 | 0.09    | 49.89                    | 48.59  | 49.54                                                        | 63.01  | 48.72                               | 50.88  | 31.53                     | 1.03                       | 0.32                                       | 2.06   | 0.67   | 0.4                                        | 0.17                                       | 0         | 0.56    | 0.07                   | 0                      | 0.36                  | 0            | -0.15      | -0.12           | 0.96               | 0.23             | 0.68         | 0                 | 1.3         | -0.14 | 1.98                                               | 0.61   | 0.05   |      |      |          |         |          |
| TA-AML3_AML36 | 0.02    | 56.82                    | 56.62  | 56.74                                                        | 84.51  | 56.15                               | 55.21  | 46.34                     | 0.8                        | -0.09                                      | 4.61   | 0.71   | 0.67                                       | 0.32                                       | 0.03      | 0.55    | 0.43                   | -0.04                  | 0.03                  | -0.16        | -0.19      | -0.23           | 0.12               | -0.17            | 0.21         | -0.11             | -0.37       | -0.19 | -0.09                                              | 0.16   | 0.07   |      |      |          |         |          |
| TA-AML2_AML33 | 2.85    | 180.2                    | 177.58 | 181.55                                                       | 211.12 | 168.51                              | 183.54 | 185.09                    | 5.03                       | 0.1                                        | 297.7  | 120.29 | 3.02                                       | 2.46                                       | 3.07      | 2.69    | 1.18                   | 1.27                   | 1.5                   | 4.41         | -0.02      | -0.09           | 1.43               | 1.86             | 6.39         | 0.96              | 5.83        | 1.52  | 2.46                                               | 1.49   | 1.08   |      |      |          |         |          |
| TA-AML2_AML42 | -0.05   | 47.85                    | 43.16  | 41.91                                                        | 120.15 | 38.13                               | 70.88  | 21.68                     | 0.3                        | -0.17                                      | 1.15   | 0.58   | 0.21                                       | 0.11                                       | 0.48      | 0.2     | -0.07                  | -0.03                  | 0.16                  | -0.24        | -0.08      | -0.14           | -0.21              | 0.06             | -0.02        | -0.14             | -0.06       | -0.3  | 0.6                                                | -0.01  | -0.03  |      |      |          |         |          |
| TA-AML4_AML4  | 0.19    | 192.98                   | 190.34 | 191.47                                                       | 237.64 | 181.74                              | 239.49 | 163.77                    | -0.02                      | -0.25                                      | 0.49   | 1.76   | -0.05                                      | 0.45                                       | -0.08     | 0.63    | -0.34                  | -0.28                  | -0.11                 | -0.19        | -0.27      | -0.32           | -0.13              | -0.24            | -0.06        | -0.3              | 0.97        | 0.53  | 0.57                                               | 0.13   | -0.2   |      |      |          |         |          |
| TA-AML4_AML15 | 5.91    | 107.35                   | 105.69 | 108.87                                                       | 139.74 | 105.99                              | 107.59 | 58.41                     | 4.41                       | 1.99                                       | 45.57  | 142.18 | 2.69                                       | 0.23                                       | 0.84      | 45.89   | 102.94                 | 0.51                   | 0.64                  | 0.57         | -0.17      | -0.24           | 0.3                | 1.94             | 0.12         | 1.02              | -0.11       | 2.18  | 0.89                                               | 0.69   | 0.45   | 1.64 |      |          |         |          |
| TA-AML2_AML22 | 7.58    | 42.35                    | 42.34  | 62                                                           | 90.66  | 59.5                                | 41.72  | 21.18                     | 3.5                        | 4.13                                       | 11.02  | 5.26   | 2.13                                       | 0.98                                       | 0.21      | 1.9     | 0.55                   | 0.47                   | 0.64                  | 0.52         | -0.2       | -0.26           | 2.25               | 0.4              | 1.44         | 0.15              | 10.51       | 1.16  | 1.29                                               | 0.77   | 2.44   |      |      |          |         |          |
| TA-AML1_AML18 | 159.7   | 118.53                   | 114.06 | 71.28                                                        | 98.78  | 62.26                               | 134.81 | 133.58                    | 6.16                       | 1.89                                       | 185.06 | 203    | 4.04                                       | 2.88                                       | 5.01      | 133.38  | 3.99                   | 1.42                   | 1.21                  | 3.86         | 0.36       | 0.13            | 2.1                | 1.88             | 8.33         | 1.11              | 67.51       | 2.35  | 1.98                                               | 2.41   | 3.69   |      |      |          |         |          |
| TA-AML3_AML4  | 2.46    | 538.25                   | 527.22 | 528.38                                                       | 512.83 | 533.42                              | 560.99 | 324.56                    | 2.11                       | -0.08                                      | 83.87  | 9.09   | 2.1                                        | 1.86                                       | 1.22      | 1.66    | 0.67                   | 0.94                   | 0.29                  | 0.99         | -0.15      | -0.13           | 2.61               | 0.17             | 1.8          | 0.17              | 1.47        | 1.44  | 1.84                                               | 0.9    | 0.41   |      |      |          |         |          |
| TA-AML2_AML19 | 239.55  | 309.59                   | 306.82 | 314.52                                                       | 317.69 | 314.08                              | 301.76 | 238.71                    | 6.19                       | 3.73                                       | 201.3  | 314.78 | 5.08                                       | 3.86                                       | 3.49      | 12.67   | 9.25                   | 4.82                   | 3.21                  | 45.62        | 0.87       | 0.34            | 7.76               | 3.6              | 12.7         | 1.79              | 7.84        | 4.73  | 3.76                                               | 1.88   | 5.57   |      |      |          |         |          |
| TA-AML2_AML29 | 327.93  | 494.72                   | 474.33 | 500.13                                                       | 484.06 | 503.16                              | 493.67 | 116.89                    | 5.25                       |                                            |        |        |                                            |                                            |           |         |                        |                        |                       |              |            |                 |                    |                  |              |                   |             |       |                                                    |        |        |      |      |          |         |          |



|                                                                                                                                                                                                                                              |                   | CD117 Median                                  |                          |                                                              |                                                             |                           |                            |                                                              |       |                                               |                                            |           |              |                          |                        |                            |               |            |                 |                    |                  |              |                   |             |                                                    |        |        |       |       |          |         |          |       |       |
|----------------------------------------------------------------------------------------------------------------------------------------------------------------------------------------------------------------------------------------------|-------------------|-----------------------------------------------|--------------------------|--------------------------------------------------------------|-------------------------------------------------------------|---------------------------|----------------------------|--------------------------------------------------------------|-------|-----------------------------------------------|--------------------------------------------|-----------|--------------|--------------------------|------------------------|----------------------------|---------------|------------|-----------------|--------------------|------------------|--------------|-------------------|-------------|----------------------------------------------------|--------|--------|-------|-------|----------|---------|----------|-------|-------|
|                                                                                                                                                                                                                                              |                   | Ungated                                       | CD34+CD38 <sup>low</sup> | CD49b <sup>neg</sup> CD34 <sup>low</sup> CD38 <sup>low</sup> | CD33 <sup>neg</sup> CD34 <sup>low</sup> CD38 <sup>low</sup> | HSC-90hi13 <sup>neg</sup> | MPP-90low33 <sup>neg</sup> | CD134 <sup>neg</sup> CD38 <sup>low</sup> CD33 <sup>mid</sup> | GMP   | 34 <sup>neg</sup> CD38 <sup>low</sup> +Undiff | 34 <sup>neg</sup> 38 <sup>neg</sup> Undiff | Myelo/Mon | ProMonoocyte | CD14 <sup>neg</sup> Mono | CD14 <sup>+</sup> Mono | 11b+DR <sup>neg</sup> Mono | ProMyeloocyte | Myelocytes | Meta-myelocytes | Mature Granulocyte | Pro-erythroblast | Erythroblast | Late Erythroblast | Pre-B Cells | Mature B cells CD20 <sup>+</sup> CD19 <sup>+</sup> | Plasma | T Cell | pDC   | mDC   | Basophil | NK Cell | Platelet |       |       |
| TA-AML1_AML26<br>TA-AML3_AML35<br>TA-AML3_AML5                                                                                                                                                                                               | CBF-AML (t(8;21)) | 0                                             | 10.81                    | 10.44                                                        | 10.15                                                       | 10.76                     | 9.82                       | 12.46                                                        | 10.05 | 2.86                                          | 0.02                                       | 6.34      | 0.24         | 0                        | -0.05                  | 2.68                       | 0             | -0.02      | -0.08           | -0.09              | -0.06            | -0.17        | -0.25             | 3.44        | -0.17                                              | 0      | -0.21  | 0.57  | -0.06 | -0.08    | -0.16   | 3.06     |       |       |
|                                                                                                                                                                                                                                              |                   | 2.36                                          | 13.35                    | 13.53                                                        | 13.01                                                       | 14.11                     | 12.75                      | 14.83                                                        | 13.52 | 3.49                                          | 0.52                                       | 14.5      | 0.65         | 0.42                     | -0.09                  | 0.21                       | 0.58          | 0.22       | 0.16            | 0.08               | 0.45             | -0.03        | -0.17             | 0.84        | -0.17                                              | 0.44   | -0.15  | 4.78  | 0.86  | -0.07    | -0.15   | 0.59     |       |       |
|                                                                                                                                                                                                                                              |                   | 0.63                                          | 1.32                     | 1.33                                                         | 1.27                                                        | 1.65                      | 1.05                       | 1.54                                                         | 2.78  | 0.34                                          | -0.2                                       | 2.03      | 0.38         | 0.09                     | 0.08                   | -0.08                      | 1.56          | -0.13      | -0.09           | -0.11              | 1.34             | -0.19        | -0.15             | 0.42        | -0.18                                              | 0.5    | -0.18  | 0.77  | -0.01 | 0.05     | -0.14   | 1.1      |       |       |
| TA-AML1_AML10<br>TA-AML2_AML32                                                                                                                                                                                                               | CBF-AML inv(16)   | 1.54                                          | 5.02                     | 4.93                                                         | 3.9                                                         | 4.97                      | 3.53                       | 5.73                                                         | 2.24  | 0.97                                          | 0.39                                       | 3.1       | 0            | 0                        | -0.02                  | 0                          | 0.54          | 0          | -0.03           | -0.12              | 0.58             | -0.06        | 1.17              | -0.05       | -0.19                                              | 0      | -0.19  | 1.41  | 0     | 1.01     | -0.1    | -0.47    |       |       |
|                                                                                                                                                                                                                                              |                   | 10.04                                         | 13.01                    | 13.1                                                         | 12.1                                                        | 12.67                     | 11.96                      | 14.74                                                        | 14.38 | 1.53                                          | -0.03                                      | 14.28     | 0.2          | 0.09                     | 0.07                   | 2.13                       | 3.19          | 0.27       | 0.05            | -0.01              | 0.6              | -0.22        | -0.41             | 0.27        | -0.11                                              | 0.34   | -0.18  | 2.13  | 0.13  | 1.18     | -0.2    | 21.36    |       |       |
| TA-AML3_APL5<br>TA-AML3_APL3<br>TA-AML2_APL4<br>TA-AML4_APL1                                                                                                                                                                                 | APL (t(15;17))    | 1.04                                          | 2.1                      | 2.36                                                         | 2.16                                                        | 2.5                       | 2.1                        | 2.1                                                          | 1.93  | 1.13                                          | 0.74                                       | 1.13      | 0.37         | 0.28                     | -0.08                  | 0.65                       | 1.31          | 0.75       | -0.15           | -0.12              | 2.43             | -0.1         | 0.46              | 2.35        | -0.23                                              | 0.06   | -0.19  | 0.35  | -0.17 | 0.61     | 0.06    | X        |       |       |
|                                                                                                                                                                                                                                              |                   | 0.3                                           | 1.41                     | 1.37                                                         | 1.22                                                        | 1                         | 1.27                       | 2                                                            | 3.02  | 0.97                                          | 0.31                                       | 1.18      | -0.06        | -0.2                     | -0.15                  | 0.02                       | 0.5           | -0.17      | -0.13           | -0.11              | 1.53             | -0.12        | -0.15             | 0.85        | -0.19                                              | 0.23   | -0.23  | -0.1  | -0.09 | -0.01    | -0.17   | -0.16    |       |       |
|                                                                                                                                                                                                                                              |                   | 0.64                                          | 1.19                     | 1.46                                                         | 1.47                                                        | 1.67                      | 1.46                       | 0.89                                                         | 2.28  | 1.03                                          | 0.58                                       | 0.6       | 0.25         | 0.15                     | 0.35                   | 0.17                       | 0.85          | 0.49       | -0.13           | -0.04              | 1.38             | -0.05        | -0.21             | 1.61        | -0.19                                              | 0.42   | -0.2   | 0.39  | -0.21 | 0.24     | -0.2    | 1.91     |       |       |
|                                                                                                                                                                                                                                              |                   | 0.7                                           | 1.44                     | 1.47                                                         | 1.06                                                        | 2.12                      | 0.87                       | 1.45                                                         | 0.64  | 0.05                                          | -0.24                                      | 0.86      | 0.66         | 0.06                     | -0.15                  | 0.16                       | 0.78          | -0.15      | -0.27           | -0.19              | 0.46             | -0.16        | -0.08             | 0.09        | -0.36                                              | 0.25   | -0.34  | -0.26 | -0.28 | 0.15     | -0.29   | -0.22    |       |       |
|                                                                                                                                                                                                                                              |                   | 3.98                                          | 1.71                     | 1.81                                                         | 1.04                                                        | 1.02                      | 1.04                       | 1.76                                                         | 2.6   | 1.45                                          | 0.92                                       | 5.1       | 2.38         | 1.03                     | 0.31                   | 0.46                       | 1.03          | 1.03       | -0.07           | -0.1               | 1.75             | -0.17        | -0.17             | 0.81        | -0.21                                              | 0      | -0.16  | 1.8   | 2.41  | 0.07     | -0.14   | -0.16    |       |       |
| TA-AML2_AML27<br>TA-AML3_AML7<br>TA-AML3_AML9<br>TA-AML2_AML20<br>TA-AML2_AML21<br>TA-AML2_AML23<br>TA-AML2_AML3<br>TA-AML2_AML39<br>TA-AML4_AML37<br>TA-AML4_AML38<br>TA-AML4_AML40                                                         | FLT3-ITD+ NK-AML  | 0.09                                          | 1.39                     | 1.39                                                         | 1.23                                                        | 1.23                      | 1.15                       | 1.45                                                         | 2.07  | 0.28                                          | -0.24                                      | 1.44      | 0.17         | -0.03                    | 0                      | 0.11                       | 0.38          | -0.25      | -0.1            | 0.1                | 2.4              | -0.21        | -0.28             | -0.26       | -0.23                                              | 0.01   | -0.24  | 0.22  | 0.25  | 0.46     | -0.19   | X        |       |       |
|                                                                                                                                                                                                                                              |                   | 0.25                                          | 1.46                     | 1.46                                                         | 0.74                                                        | 0.22                      | 0.73                       | 1.6                                                          | 1.14  | 0.57                                          | -0.04                                      | 2.51      | 0.92         | -0.12                    | -0.09                  | -0.12                      | 0.09          | -0.06      | -0.03           | -0.08              | 1.36             | -0.24        | -0.31             | -0.3        | -0.13                                              | 0.16   | -0.2   | 1.68  | -0.2  | -0.38    | -0.18   | -0.28    |       |       |
|                                                                                                                                                                                                                                              |                   | 2.94                                          | 1.79                     | 1.81                                                         | 1.41                                                        | 1.79                      | 1.29                       | 2.48                                                         | 4.15  | 1.69                                          | 4.99                                       | 0.65      | 0.68         | -0.08                    | -0.1                   | -0.11                      | 1.03          | 0.25       | -0.08           | -0.14              | 2.97             | -0.13        | 0.1               | 0.88        | -0.21                                              | 0.44   | -0.2   | 3.67  | -0.03 | 0.93     | -0.08   | 1.33     |       |       |
|                                                                                                                                                                                                                                              |                   | 0.91                                          | 1.14                     | 1.14                                                         | 0.71                                                        | 0.85                      | 0.69                       | 1.17                                                         | 1.18  | 0.82                                          | -0.02                                      | 1.81      | 1.71         | 0.16                     | -0.04                  | 1.2                        | 0.36          | -0.01      | -0.17           | -0.15              | 1.32             | -0.22        | -0.27             | -0.21       | -0.09                                              | 0.15   | -0.23  | -0.18 | -0.18 | 1.22     | -0.2    | -0.43    |       |       |
|                                                                                                                                                                                                                                              |                   | 4.58                                          | 1.72                     | 1.74                                                         | 1.42                                                        | 1.29                      | 1.43                       | 1.75                                                         | 3.65  | 0.77                                          | 0.15                                       | 9.97      | 0.95         | 0.08                     | 0.01                   | -0.01                      | 2.85          | 0.28       | -0.13           | -0.09              | 1.74             | -0.18        | -0.25             | 1.49        | -0.2                                               | 0.3    | -0.2   | 0.96  | 0     | 0.36     | -0.18   | X        |       |       |
|                                                                                                                                                                                                                                              |                   | 0.41                                          | 1.02                     | 1.25                                                         | 1.19                                                        | 1.39                      | 1.17                       | 1.01                                                         | 1.56  | 2.01                                          | 0.98                                       | 3.1       | 0.94         | 0.06                     | -0.03                  | -0.07                      | 0.07          | -0.12      | -0.13           | -0.11              | 1.89             | -0.11        | -0.58             | 0.89        | -0.24                                              | 0.17   | -0.2   | 0.84  | -0.01 | -0.18    | -0.23   | 0.03     |       |       |
|                                                                                                                                                                                                                                              |                   | 0.32                                          | 7.5                      | 8.39                                                         | 2.99                                                        | 4.88                      | 2.82                       | 7.97                                                         | 15.4  | 0.18                                          | -0.11                                      | 2.7       | 1.56         | 0.4                      | 0.05                   | -0.01                      | 0.22          | 0          | -0.03           | -0.1               | 4.7              | -0.09        | -0.05             | 0.1         | -0.26                                              | 0.14   | -0.21  | 0.03  | -0.08 | -0.05    | 0.03    | 0.18     |       |       |
|                                                                                                                                                                                                                                              |                   | 0.5                                           | 0.52                     | 0.49                                                         | 0.38                                                        | 0.59                      | 0.36                       | 0.64                                                         | 1.26  | 0.81                                          | 1.04                                       | 0.51      | 0.35         | 0.02                     | -0.2                   | -0.17                      | 0.31          | -0.16      | -0.16           | -0.18              | 16.13            | -0.03        | 0.25              | -0.19       | -0.38                                              | -0.01  | -0.33  | -0.08 | 0.49  | -0.03    | 0.05    | 0.06     |       |       |
|                                                                                                                                                                                                                                              |                   | 0.51                                          | 1.4                      | 1.24                                                         | 0.79                                                        | 1.45                      | 0.79                       | 1.42                                                         | 0.83  | 0.61                                          | -0.26                                      | 4.12      | 1.93         | -0.12                    | -0.12                  | -0.23                      | 0.25          | -0.19      | -0.19           | -0.24              | 0.34             | -0.23        | -0.36             | 5.06        | -0.35                                              | -0.07  | -0.36  | 0.19  | -0.09 | -0.07    | 1.74    | -0.18    |       |       |
|                                                                                                                                                                                                                                              |                   | 0.29                                          | 0.88                     | 0.75                                                         | 0.44                                                        | 1.28                      | 0.35                       | 1.78                                                         | 1.79  | 1.05                                          | -0.2                                       | 4.39      | 2.52         | -0.3                     | -0.15                  | -0.14                      | 0.03          | -0.3       | -0.31           | -0.22              | 2.59             | -0.1         | -0.28             | 0.59        | -0.14                                              | -0.06  | -0.33  | 1.96  | 1.98  | -0.11    | -0.27   | -0.3     |       |       |
|                                                                                                                                                                                                                                              |                   | TA-AML3_AML6<br>TA-AML2_AML31<br>TA-AML4_AML8 | FLT3-TKD+ NK-AML         | 9.23                                                         | 8.76                                                        | 9.13                      | 8.22                       | 5.9                                                          | 8.35  | 10.06                                         | 17.36                                      | 16.41     | 2.01         | 17.42                    | 0.54                   | 0.06                       | -0.04         | -0.02      | 13.09           | 0.12               | 0.13             | -0.03        | 12.54             | -0.15       | -0.23                                              | 3.88   | -0.26  | 0.14  | -0.16 | 12.64    | 18.02   | 0.46     | -0.15 | 0.4   |
|                                                                                                                                                                                                                                              |                   |                                               |                          | 5.47                                                         | 4.05                                                        | 4.05                      | 3.32                       | 3.36                                                         | 3.32  | 4.2                                           | 2.12                                       | 2.98      | 3.33         | 5.9                      | 4.34                   | 0.02                       | 0.66          | -0.1       | 4.6             | 4.32               | -0.11            | -0.11        | 5.5               | 2.87        | 1.79                                               | 8.4    | -0.17  | -0.01 | -0.2  | 1.95     | 5.82    | -0.09    | -0.15 | -0.27 |
| -0.25                                                                                                                                                                                                                                        | 0.95              |                                               |                          | 0.95                                                         | 0.95                                                        | 0.66                      | 1.1                        | 1.03                                                         | 1.27  | 0.49                                          | -0.45                                      | 2.18      | -0.2         | -0.09                    | -0.08                  | -0.16                      | -0.25         | -0.11      | -0.28           | -0.24              | 3.22             | -0.21        | -0.46             | -0.03       | -0.27                                              | 0.09   | -0.34  | 0.64  | -0.36 | -0.52    | -0.14   | -0.22    |       |       |
| TA-AML1_AML13<br>TA-AML3_AML36<br>TA-AML2_AML33<br>TA-AML2_AML42<br>TA-AML4_AML14<br>TA-AML4_AML15                                                                                                                                           | FLT3wt NK-AML     | -0.01                                         | 5.3                      | 5.44                                                         | 3.8                                                         | 6.03                      | 3.63                       | 10.35                                                        | 9.97  | 7.39                                          | 3.09                                       | 10.93     | -0.08        | -0.22                    | -0.2                   | -0.23                      | 0.18          | -0.04      | -0.17           | -0.03              | 1.74             | -0.19        | -0.19             | -0.05       | -0.13                                              | -0.17  | -0.23  | 0.22  | -0.35 | 0.64     | -0.19   | -0.32    |       |       |
|                                                                                                                                                                                                                                              |                   | -0.17                                         | 3.32                     | 3.28                                                         | 3.27                                                        | 2.91                      | 3.28                       | 3.7                                                          | 5.86  | 0.52                                          | -0.24                                      | 2.46      | -0.16        | -0.31                    | -0.16                  | -0.03                      | 0.01          | -0.05      | -0.2            | -0.13              | -0.07            | -0.19        | -0.19             | -0.26       | -0.42                                              | -0.36  | -0.18  | -0.3  | 0.1   | -0.39    | -0.19   | -0.32    |       |       |
|                                                                                                                                                                                                                                              |                   | 0.58                                          | 2.33                     | 2.1                                                          | 1.63                                                        | 1.5                       | 1.74                       | 3.22                                                         | 2.89  | 0.29                                          | -0.28                                      | 7.56      | 3.31         | -0.08                    | -0.04                  | -0.19                      | 0.17          | -0.14      | -0.09           | -0.05              | 4.44             | -0.19        | -0.3              | -0.21       | -0.09                                              | 0.03   | -0.2   | -0.04 | -0.15 | -0.18    | -0.14   | 0.51     |       |       |
|                                                                                                                                                                                                                                              |                   | -0.24                                         | 2.38                     | 3.13                                                         | 3.64                                                        | 3.92                      | 3.46                       | 1.79                                                         | 7.64  | 0.34                                          | -0.25                                      | 0.79      | -0.03        | -0.19                    | -0.29                  | -0.27                      | -0.12         | -0.28      | -0.16           | -0.22              | -0.17            | -0.2         | -0.31             | 0.2         | -0.26                                              | -0.24  | -0.3   | -0.23 | 2.61  | 1.12     | -0.33   | -0.28    |       |       |
|                                                                                                                                                                                                                                              |                   | -0.22                                         | 2.12                     | 2.09                                                         | 2.05                                                        | 3.6                       | 1.79                       | 3.43                                                         | 3.76  | -0.32                                         | -0.41                                      | -0.33     | -0.31        | -0.49                    | -0.3                   | -0.38                      | -0.06         | -0.4       | -0.39           | -0.31              | 0.13             | -0.24        | -0.26             | -0.32       | -0.34                                              | -0.36  | -0.39  | -0.21 | -0.29 | -0.21    | -0.37   | -0.32    |       |       |
| 0.18                                                                                                                                                                                                                                         | 0.87              | 0.94                                          | 1.16                     | 3.67                                                         | 0.97                                                        | 0.67                      | 0.74                       | 0.61                                                         | 0.31  | 1.4                                           | 1.61                                       | -0.12     | -0.36        | -0.17                    | 1.42                   | 1.15                       | -0.3          | -0.21      | 0.38            | -0.24              | -0.34            | 0.62         | -0.34             | -0.26       | -0.37                                              | -0.26  | -0.28  | -0.2  | -0.35 | -0.3     |         |          |       |       |
| TA-AML2_AML22<br>TA-AML1_AML18<br>TA-AML3_AML4<br>TA-AML2_AML19<br>TA-AML2_AML29<br>TA-AML2_AML41<br>TA-AML4_AML25                                                                                                                           | MLL (t(10;11))    | 0.23                                          | 1.44                     | 1.43                                                         | 0.84                                                        | 1.21                      | 0.81                       | 1.51                                                         | 0.27  | -0.11                                         | 0.01                                       | 0.39      | 0.2          | -0.04                    | -0.02                  | -0.37                      | 0.17          | -0.12      | -0.13           | -0.18              | 1.52             | -0.24        | -0.2              | 0.42        | -0.16                                              | 0.08   | -0.23  | 0.77  | 0.37  | -0.06    | -0.22   | 0.09     |       |       |
|                                                                                                                                                                                                                                              |                   | 0.94                                          | 0.69                     | 0.65                                                         | 0.66                                                        | 3.1                       | 0.08                       | 0.73                                                         | 0.59  | 0.17                                          | -0.22                                      | 1.19      | 1.44         | 0                        | -0.04                  | -0.04                      | 0.89          | 0.03       | -0.13           | -0.12              | 0.98             | -0.19        | -0.25             | -0.16       | -0.19                                              | 0.83   | -0.18  | 0.26  | -0.03 | 0        | -0.08   | 0        |       |       |
|                                                                                                                                                                                                                                              |                   | 0.85                                          | 10.27                    | 10.02                                                        | 9.2                                                         | 11.67                     | 8.37                       | 13.11                                                        | 12.03 | 0.58                                          | -0.29                                      | 6.73      | 0.35         | -0.12                    | -0.06                  | -0.21                      | 0.67          | -0.18      | -0.22           | -0.2               | 3.38             | -0.22        | -0.32             | 0.22        | -0.24                                              | 0.18   | -0.23  | 0.12  | 0.45  | 0.48     | -0.24   | -0.21    |       |       |
|                                                                                                                                                                                                                                              |                   | 1.49                                          | 1.7                      | 1.72                                                         | 0.87                                                        | 1.28                      | 0.82                       | 2.32                                                         | 2.48  | 1.62                                          | 1.77                                       | 5.6       | 3.03         | 1.02                     | -0.04                  | 1.04                       | 3.36          | 0.87       | 0.04            | -0.03              | 5.01             | -0.11        | -0.12             | 0.47        | -0.15                                              | 0.25   | -0.18  | 0.55  | -0.06 | 0.48     | -0.19   | 0.15     |       |       |
|                                                                                                                                                                                                                                              |                   | 0.76                                          | 0.69                     | 0.64                                                         | 0.3                                                         | 0.59                      | 0.26                       | 0.9                                                          | 0.55  | 0.25                                          | 0.22                                       | 1.92      | 0.55         | -0.14                    | 0.06                   | -0.04                      | 1.83          | 0.12       | 0.24            | -0.12              | 0.93             | -0.15        | 0.13              | -0.18       | -0.21                                              | 0.07   | -0.19  | 0.35  | -0.14 | -0.27    | -0.15   | -0.24    |       |       |
|                                                                                                                                                                                                                                              |                   | -0.24                                         | 0.74                     | 0.63                                                         | 0.55                                                        | 1.04                      | 0.41                       | 1.54                                                         | 1.27  | -0.23                                         | -0.33                                      | -0.26     | -0.26        | -0.26                    | -0.24                  | -0.23                      | -0.21         | -0.24      | -0.22           | 0.6                | -0.22            | -0.27        | 0.05              | -0.28       | -0.11                                              | -0.19  | 0.25   | -0.44 | 0.6   | -0.32    | -0.2    | -0.25    |       |       |
| TA-AML1_NI-1<br>TA-AML1_NI-3<br>TA-AML1_NI-5<br>TA-AML1_NI-6<br>TA-AML3_NI-4<br>TA-AML3_NI-4<br>TA-AML3_NI-5<br>TA-AML2_NI-6<br>TA-AML2_NI-3<br>TA-AML2_NI-4<br>TA-AML4_NI-4<br>TA-AML4_NI-5<br>TA-AML4_NI-5<br>TA-AML4_NI-5<br>TA-AML4_NI-4 | Healthy Donors    | -0.13                                         | 4.86                     | 5.18                                                         | 4.24                                                        | 5.37                      | 2.71                       | 5.15                                                         | 1.37  | 0                                             | -0.32                                      | 0.82      | -0.11        | -0.12                    | -0.08                  | -0.08                      | -0.19         | -0.13      | -0.17           | -0.14              | -0.11            | 0.99         | -0.18             | -0.23       | -0.17                                              | -0.2   | 0      | -0.22 | -0.04 | -0.1     | -0.02   | -0.11    |       |       |
| -0.1                                                                                                                                                                                                                                         |                   | 3.03                                          | 3.07                     | 2.62                                                         | 2.84                                                        | 2.6                       | 3.61                       | 3.28                                                         | 1.04  | -0.21                                         | 0.63                                       | 0         | -0.01        | -0.05                    | -0.01                  | -0.07                      | -0.14         | -0.11      | -0.09           | 0.72               | -0.16            | -0.17        | -0.16             | -0.21       | -0.07                                              | -0.23  | 0      | -0.19 | -0.08 | -0.14    | -0.07   |          |       |       |
| -0.08                                                                                                                                                                                                                                        |                   | 2.43                                          | 2.44                     | 2.16                                                         | 2.61                                                        | 1.64                      | 3.15                       | 1.89                                                         | 0.52  | -0.24                                         | 0.49                                       | 0         | 0            | 0                        | 0                      | 0                          | -0.06         | -0.1       | -0.07           | -0.07              | 0.29             | -0.2         | -0.26             | -0.17       | -0.19                                              | 0      | -0.21  | 0     | -0.16 | -0.05    | -0.13   | -0.04    |       |       |
| -0.08                                                                                                                                                                                                                                        |                   | 2.45                                          | 2.44                     | 2.17                                                         | 2.65                                                        | 1.72                      | 3.41                       | 2.42                                                         | 0.59  | -0.2                                          | 1                                          | 0         | 0            | 0                        | 0                      | 0.62                       | -0.1          | -0.13      | -0.11           | -0.09              | 0.39             | -0.18        | -0.22             | -0.11       | -0.16                                              | -0.03  | -0.22  | -0.03 | -0.08 | 0        | -0.13   | -0.05    |       |       |
| -0.04                                                                                                                                                                                                                                        |                   | 2.5                                           | 2.46                     | 2.01                                                         | 2.78                                                        | 1.87                      | 3.68                       | 1.96                                                         | 0.66  | -0.2                                          | 0.94                                       | 0.31      | 0.21         |                          |                        |                            |               |            |                 |                    |                  |              |                   |             |                                                    |        |        |       |       |          |         |          |       |       |

### CD56 Median

|                                                                                                                                                                                              |                       | Ungated                                       | CD34+CD38 <sup>low</sup><br>CD34+CD38 <sup>high</sup> | CD49bR <sup>neg</sup><br>CD34+CD38 <sup>low</sup> | CD33 <sup>neg</sup> CD3 <sup>4+</sup><br>CD38 <sup>low</sup> | HSC-<br>90h133 <sup>neg</sup> | MPP-<br>90low33 <sup>ne</sup><br>g | CMP-<br>CD34+CD33 <sup>mid</sup><br>ovCD33 <sup>mid</sup> | GMP   | 34 <sup>neg</sup> CD38<br>+Undiff | 34 <sup>neg</sup> 38 <sup>neg</sup><br>Undiff | Myelo/Mon<br>oblast | ProMonocyte | CD14 <sup>neg</sup><br>Mono | CD14 <sup>+</sup><br>Mono | 11b+DR <sup>neg</sup><br>Mono | ProMyelocyte | Myelocytes | Meta-<br>myelocytes | Mature<br>Granulocyte | Pro-<br>erythroblast | Erythroblast | Late<br>Erythroblast | Pre-B Cells | Mature B<br>CD20+CD19 <sup>+</sup> | Plasma | T Cell | pDC   | mDC   | Basophil | NK Cell | Platelet |       |       |
|----------------------------------------------------------------------------------------------------------------------------------------------------------------------------------------------|-----------------------|-----------------------------------------------|-------------------------------------------------------|---------------------------------------------------|--------------------------------------------------------------|-------------------------------|------------------------------------|-----------------------------------------------------------|-------|-----------------------------------|-----------------------------------------------|---------------------|-------------|-----------------------------|---------------------------|-------------------------------|--------------|------------|---------------------|-----------------------|----------------------|--------------|----------------------|-------------|------------------------------------|--------|--------|-------|-------|----------|---------|----------|-------|-------|
| TA-AML1_AML26<br>TA-AML3_AML35<br>TA-AML3_AML5                                                                                                                                               | CBF-AML<br>(16/21)    | 3.91                                          | 12.42                                                 | 13.94                                             | 13.7                                                         | 14.63                         | 13.32                              | 13.11                                                     | 32.78 | 6.23                              | 2.84                                          | 19.92               | 8.32        | 8.62                        | 7.09                      | 5.04                          | 2.43         | 3          | 2.9                 | 2.44                  | 1.68                 | 0.76         | 1.19                 | 5.05        | 3.55                               | 10.08  | 3.75   | 7.86  | 5.29  | 2.57     | 20.14   | 6.1      |       |       |
|                                                                                                                                                                                              |                       | 9.05                                          | 14.16                                                 | 14.21                                             | 14.14                                                        | 14.16                         | 14.12                              | 14.4                                                      | 15.11 | 13.41                             | 14.91                                         | 14.68               | 4.69        | 3.21                        | 5.31                      | 1.94                          | 6.3          | 2.96       | 2.6                 | 2.5                   | 9.64                 | 0.94         | 2.2                  | 9.49        | 1.83                               | 10.34  | 1.75   | 7.52  | 2.84  | 2.43     | 30.38   | 2.77     |       |       |
|                                                                                                                                                                                              |                       | 3.29                                          | 4.48                                                  | 4.33                                              | 4.31                                                         | 4.69                          | 4.17                               | 5                                                         | 5.05  | 5.7                               | 2.48                                          | 5.77                | 5.41        | 4.33                        | 3.66                      | 2.52                          | 5.43         | 1.81       | 1.21                | 0.75                  | 5.8                  | -0.04        | -0.21                | 6.27        | 1.41                               | 5.61   | 1.02   | 3.17  | 1.42  | 1.17     | 17.1    | 2.15     |       |       |
| TA-AML1_AML10<br>TA-AML2_AML32                                                                                                                                                               | CBF-AML<br>Inv(16)    | 2.98                                          | 3.24                                                  | 3.21                                              | 2.81                                                         | 3.1                           | 2.66                               | 3.58                                                      | 2.91  | 2.45                              | 1.56                                          | 3.62                | 3.04        | 2.99                        | 2.17                      | 1.61                          | 4.49         | 2.57       | 2.04                | 1.21                  | 2.84                 | 0.51         | 1.72                 | 7.27        | 1.36                               | 6.14   | 1.42   | 3.76  | 1.85  | 1.01     | 35.85   | 1.82     |       |       |
|                                                                                                                                                                                              |                       | 2.24                                          | 2.46                                                  | 2.45                                              | 2.36                                                         | 2.6                           | 2.31                               | 2.65                                                      | 2.58  | 3.29                              | 0.58                                          | 2.93                | 1.61        | 1.5                         | 1.21                      | 1.36                          | 4.1          | 2.32       | 1.47                | 1.54                  | -0.06                | -0.3         | -0.33                | 2.01        | 0.43                               | 4.04   | 0.71   | 1.93  | 1.46  | 0.94     | 23.59   | 3.03     |       |       |
| TA-AML3_APL5<br>TA-AML3_APL3<br>TA-AML2_APL4<br>TA-AML4_APL1                                                                                                                                 | APL (15/17)           | 4.76                                          | 4.47                                                  | 4.5                                               | 2.92                                                         | 2.04                          | 3                                  | 4.52                                                      | 4.29  | 4.41                              | 3.94                                          | 4.94                | 4.06        | 3.42                        | 1.33                      | 4.93                          | 5.2          | 4.73       | 1.41                | 1.56                  | 3.15                 | 1.99         | 3.86                 | 0.83        | 6.17                               | 1.51   | 4.93   | 1.25  | 5.61  | 14.91    | X       |          |       |       |
|                                                                                                                                                                                              |                       | 3.31                                          | 3.06                                                  | 2.99                                              | 2.32                                                         | 1.88                          | 2.4                                | 4.53                                                      | 4.99  | 5.03                              | 4.93                                          | 5.43                | 3.89        | 2.92                        | 2.22                      | 3.96                          | 4.99         | 1.47       | 1.7                 | 1.83                  | 0.86                 | 0.65         | 1.89                 | 7.62        | 1.78                               | 8.66   | 1.21   | 6.62  | 2.6   | 3.5      | 14.7    | 4.73     |       |       |
|                                                                                                                                                                                              |                       | 3.17                                          | 1.66                                                  | 1.41                                              | 1.19                                                         | 1.44                          | 1.16                               | 2.63                                                      | 1.33  | 3.28                              | 2.36                                          | 3.53                | 2.97        | 2.62                        | 2.05                      | 2.94                          | 3.15         | 2.63       | 0.99                | 1.07                  | 0.86                 | 0.4          | 0.31                 | 3.6         | 0.67                               | 6.23   | 0.69   | 3.57  | 0.78  | 1.12     | 16.81   | 2.9      |       |       |
|                                                                                                                                                                                              |                       | 6.89                                          | 6.71                                                  | 6.6                                               | 2.81                                                         | 1.74                          | 3.04                               | 6.82                                                      | 5.76  | 5.3                               | 3.68                                          | 7.13                | 8.87        | 6.58                        | 2.1                       | 7.41                          | 6.34         | 1.93       | 1.32                | 1.47                  | 3.21                 | -0.13        | 0.98                 | 0.27        | 0.97                               | 6.96   | 3.62   | 6.15  | 2.08  | 8.15     | 17.87   | 1.92     |       |       |
| TA-AML1_AML27<br>TA-AML3_AML7<br>TA-AML3_AML9<br>TA-AML2_AML20<br>TA-AML2_AML21<br>TA-AML2_AML23<br>TA-AML2_AML30<br>TA-AML2_AML39<br>TA-AML4_AML37<br>TA-AML4_AML38<br>TA-AML4_AML40        | FLT3-ITD+ NK<br>AML   | 5.47                                          | 4.44                                                  | 4.29                                              | 3.34                                                         | 3.58                          | 3.32                               | 4.52                                                      | 4.55  | 5.13                              | 4.62                                          | 5.72                | 6.64        | 6.09                        | 1.68                      | 2.95                          | 4.84         | 4.04       | 1.39                | 1.14                  | 1.5                  | -0.08        | -0.33                | 4.74        | 1.19                               | 4.14   | 1.3    | 7.45  | 5.71  | 2.07     | 23.71   | 1.22     |       |       |
|                                                                                                                                                                                              |                       | 1.91                                          | 1.93                                                  | 1.85                                              | 1.54                                                         | 1.48                          | 1.24                               | 2.22                                                      | 2.77  | 3.58                              | 0.79                                          | 3.98                | 2.42        | 1.87                        | 1.52                      | 1.66                          | 3.65         | 1.79       | 1.74                | 1.81                  | 1.94                 | -0.2         | -0.24                | 3.65        | 0.88                               | 5.62   | 0.52   | 2.04  | 2.56  | 2.86     | 27.03   | X        |       |       |
|                                                                                                                                                                                              |                       | 1.49                                          | 1.72                                                  | 1.45                                              | 1.07                                                         | 1.49                          | 1.04                               | 1.53                                                      | 1.54  | 2.34                              | 0.57                                          | 2.06                | 2.18        | 2.05                        | 1.42                      | 0.89                          | 1.49         | 1.11       | 1.22                | 1.43                  | 1.54                 | -0.14        | -0.06                | 3.72        | 0.78                               | 3.35   | 0.97   | 0.87  | 1.32  | -0.07    | 23.81   | 3.57     |       |       |
|                                                                                                                                                                                              |                       | 2.45                                          | 1.92                                                  | 2.1                                               | 1.28                                                         | 1.34                          | 1.19                               | 2.44                                                      | 2.47  | 2                                 | 1.77                                          | 2.99                | 3.21        | 2.14                        | 1.75                      | 1.56                          | 2.88         | 1.72       | 1.18                | 0.60                  | 1.26                 | -0.07        | 0.29                 | 3.93        | 1.27                               | 6.2    | 0.65   | 4.13  | 1.46  | 0.93     | 15.3    | 1.92     |       |       |
|                                                                                                                                                                                              |                       | 1.46                                          | 1.38                                                  | 1.39                                              | 0.99                                                         | 1.19                          | 0.96                               | 1.4                                                       | 1.65  | 2.27                              | 1.63                                          | 2.05                | 2.29        | 1.83                        | 1.7                       | 2.43                          | 2.42         | 1.7        | 1.4                 | 1.52                  | 1.18                 | -0.16        | -0.07                | 1.31        | 0.73                               | 3.47   | 0.57   | 1.17  | 1.78  | 2.55     | 19.75   | 2.31     |       |       |
|                                                                                                                                                                                              |                       | 2.87                                          | 2.4                                                   | 2.4                                               | 2.03                                                         | 2.34                          | 2                                  | 2.43                                                      | 2.36  | 1.82                              | 1.25                                          | 3.34                | 3.73        | 4.53                        | 3.45                      | 1.67                          | 2.27         | 2.27       | 1.86                | 1.4                   | 1.29                 | -0.01        | -0.24                | 1.32        | 0.54                               | 4.53   | 1.17   | 2.02  | 1.15  | 0.42     | 39.5    | X        |       |       |
|                                                                                                                                                                                              |                       | 2.06                                          | 1.9                                                   | 1.98                                              | 1.67                                                         | 1.87                          | 1.65                               | 1.92                                                      | 2.67  | 2.39                              | 1.83                                          | 2.71                | 2.33        | 2.78                        | 2.7                       | 1.96                          | 1.96         | 1.31       | 0.76                | 0.74                  | 0.68                 | -0.04        | -0.03                | 2.94        | 0.64                               | 3.41   | 1.44   | 2.15  | 0.88  | 0.16     | 36.28   | 3.92     |       |       |
|                                                                                                                                                                                              |                       | 3.61                                          | 3.22                                                  | 2.3                                               | 1.03                                                         | 0.93                          | 1.04                               | 2.49                                                      | 2.15  | 2.98                              | 3.13                                          | 4.89                | 5.23        | 3.91                        | 4.63                      | 2.39                          | 2.53         | 2.11       | 1.93                | 1.82                  | 3.35                 | 0.34         | 0.49                 | 3.74        | 1.05                               | 5.69   | 0.95   | 4.25  | 2.65  | 0.88     | 18.42   | 1.5      |       |       |
|                                                                                                                                                                                              |                       | 1.89                                          | 1.98                                                  | 1.94                                              | 1.72                                                         | 2.02                          | 1.7                                | 2.21                                                      | 1.51  | 2.15                              | 2.12                                          | 2.29                | 2.04        | 0.94                        | 0.4                       | 0.89                          | 2.37         | 0.97       | 0.63                | 0.53                  | 1.11                 | -0.16        | 0.43                 | 1.58        | 0.36                               | 3.18   | 1.17   | 0.6   | 2.54  | 1.74     | 12.21   | 0.13     |       |       |
|                                                                                                                                                                                              |                       | 1.35                                          | 3.37                                                  | 2.78                                              | 0.88                                                         | 2.89                          | 0.85                               | 3.45                                                      | 0.64  | 4.45                              | 0.64                                          | 2.78                | 0.89        | 4.23                        | 4.94                      | 2.93                          | 2.34         | 0.98       | 3.13                | 1.44                  | 1.43                 | 1.17         | 0.27                 | -0.26       | -0.28                              | 4.43   | 0.75   | 4.68  | 0.58  | 1.42     | 2.61    | 1.4      | 7.43  | -0.09 |
|                                                                                                                                                                                              |                       | 2.34                                          | 3.26                                                  | 3.03                                              | 2.33                                                         | 3.34                          | 2.72                               | 4.92                                                      | 3.34  | 2.77                              | 0.82                                          | 4.82                | 6.06        | 3.2                         | 3                         | 2.78                          | 6.84         | 1.13       | 0.86                | 1.15                  | 2.36                 | 0.07         | 0.04                 | 0.49        | 2.11                               | 4.48   | 1.02   | 5.86  | 6.29  | 1.1      | 34.01   | 10.5     |       |       |
|                                                                                                                                                                                              |                       | TA-AML3_AML6<br>TA-AML2_AML31<br>TA-AML4_AML8 | FLT3-TKD+<br>NK-AML                                   | 3.69                                              | 1.71                                                         | 1.7                           | 1.66                               | 1.81                                                      | 1.65  | 1.86                              | 1.91                                          | 1.8                 | 2.74        | 2.41                        | 32.25                     | 58.15                         | 49.05        | 40.58      | 2.98                | 2.47                  | 3.41                 | 2.37         | 6.89                 | 0           | -0.22                              | 3.26   | 0.56   | 5.43  | 0.74  | 2        | 3.03    | 0.7      | 49.06 | 2.56  |
| 1.65                                                                                                                                                                                         | 1.42                  |                                               |                                                       | 1.42                                              | 1.4                                                          | 1.42                          | 1.39                               | 1.42                                                      | 1.24  | 1.39                              | 1.37                                          | 1.7                 | 1.67        | 1.09                        | 1.35                      | 0.88                          | 1.79         | 2          | 1.16                | 1.2                   | 1.15                 | 0.73         | 2.19                 | 1.9         | 0.42                               | 3.89   | 0.18   | 0.98  | 2.04  | 0.72     | 14.83   | 2.55     |       |       |
| 1.36                                                                                                                                                                                         | 3.37                  |                                               |                                                       | 3.29                                              | 3.8                                                          | 4.51                          | 2.86                               | 3.61                                                      | 3.5   | 4.8                               | -0.17                                         | 6.79                | 15.41       | 14.2                        | 16.54                     | 3.51                          | 3.36         | 1.27       | 0.98                | 1.19                  | 1.57                 | -0.11        | -0.36                | 4.65        | 1.58                               | 5.21   | 0.9    | 3.34  | 1.99  | 1.67     | 50.85   | 1.45     |       |       |
| TA-AML1_AML13<br>TA-AML3_AML36<br>TA-AML2_AML33<br>TA-AML2_AML42<br>TA-AML4_AML14<br>TA-AML4_AML15                                                                                           | FLT3wt NK<br>AML      | 0.8                                           | 1.72                                                  | 1.52                                              | 1.22                                                         | 2.51                          | 1.13                               | 2.62                                                      | 2.08  | 1.52                              | 0.74                                          | 2.39                | 4.5         | 2.4                         | 3.07                      | 1.75                          | 1.01         | 0.33       | 0.15                | 0.85                  | 0.29                 | 0            | -0.05                | 3.64        | 1.02                               | 1.96   | 0.7    | 2.1   | 0     | 0.35     | 26.85   | 1.37     |       |       |
|                                                                                                                                                                                              |                       | 0.8                                           | 0.66                                                  | 0.6                                               | 0.56                                                         | 1.26                          | 0.52                               | 1.9                                                       | 0.98  | 0.62                              | 0.44                                          | 2.08                | 1.24        | 0.92                        | 2.17                      | 0.6                           | 2.43         | 1.7        | 0.58                | 0.63                  | -0.17                | 0.1          | -0.05                | 2.61        | 0.37                               | 1.37   | 1.09   | -0.03 | -0.1  | 0.34     | 12.48   | 1.09     |       |       |
|                                                                                                                                                                                              |                       | 2.12                                          | 3.49                                                  | 3.46                                              | 3.03                                                         | 2.85                          | 3.06                               | 3.75                                                      | 3.59  | 3.19                              | 0.16                                          | 4.11                | 3.8         | 1.9                         | 1.67                      | 1.54                          | 1.65         | 1.37       | 1.46                | 1.76                  | 1.3                  | -0.09        | -0.12                | 1.49        | 1.81                               | 3.79   | 1.38   | 3.18  | 1.2   | 0.65     | 22.35   | 2.56     |       |       |
|                                                                                                                                                                                              |                       | 0.64                                          | 1.56                                                  | 1.13                                              | 0.88                                                         | 1.21                          | 0.62                               | 2.97                                                      | 1.46  | 0.38                              | 0.08                                          | 2.06                | 3.61        | 3.83                        | 3.93                      | 2.02                          | 2.28         | 1.2        | 0.59                | 0.55                  | -0.06                | -0.03        | 0.07                 | 1.82        | 0.36                               | 1.18   | 0.27   | 0.4   | 11.78 | 1.46     | 8.93    | 0.52     |       |       |
|                                                                                                                                                                                              |                       | 0.72                                          | 1.29                                                  | 1.24                                              | 1.2                                                          | 2.76                          | 0.97                               | 2.71                                                      | 2.02  | 1                                 | -0.23                                         | -0.05               | 0.39        | 0.17                        | 0.37                      | -0.1                          | 1.33         | 0.02       | 0.27                | 0.82                  | -0.05                | -0.13        | -0.26                | 1.56        | 0.68                               | 1.96   | 0.49   | 1.16  | 0.68  | 0.41     | 16.34   | 1.1      |       |       |
|                                                                                                                                                                                              |                       | 0.83                                          | 0.78                                                  | 0.79                                              | 0.81                                                         | 2.27                          | 0.7                                | 0.79                                                      | 0.65  | 0.7                               | -0.37                                         | 1.16                | 1.3         | 0.79                        | 2.04                      | 0.25                          | 3.04         | 1.82       | 0.87                | 1.2                   | 0.3                  | 0.15         | -0.31                | 3.46        | 1.04                               | 3.84   | 1.04   | 3.84  | 0.82  | 1.3      | 1.21    | 0.17     | 25.44 | 1.79  |
| TA-AML2_AML22                                                                                                                                                                                | MLL (10/11)           | 40.13                                         | 39.25                                                 | 39.25                                             | 23.81                                                        | 8.79                          | 25.41                              | 40.21                                                     | 58.86 | 66.1                              | 32.47                                         | 55.56               | 52.99       | 33.06                       | 11.96                     | 1.58                          | 3.99         | 1.61       | 1.32                | 1.24                  | 0.28                 | -0.18        | -0.27                | 21.98       | 0.81                               | 3.24   | 0.48   | 46.81 | 9.76  | 0.63     | 37.78   | 1.84     |       |       |
| TA-AML1_AML18<br>TA-AML3_AML4<br>TA-AML2_AML19<br>TA-AML2_AML29<br>TA-AML2_AML41<br>TA-AML4_AML25                                                                                            | ADK-AML<br>Cmply/Mono | 8.37                                          | 6.11                                                  | 6.13                                              | 5.34                                                         | 5.44                          | 5.12                               | 6.4                                                       | 6.93  | 5.47                              | 1.92                                          | 10.09               | 8.51        | 4.05                        | 2.86                      | 3.53                          | 6.46         | 3.71       | 1.75                | 1.67                  | 4.07                 | 0.46         | 0.08                 | 1.86        | 1.72                               | 6.42   | 1.37   | 46.26 | 1.63  | 1.02     | 48.96   | 4.11     |       |       |
|                                                                                                                                                                                              |                       | 2.69                                          | 4.6                                                   | 4.34                                              | 3.95                                                         | 5.79                          | 3.43                               | 6.54                                                      | 3.32  | 2.51                              | -0.08                                         | 4.04                | 3.5         | 3.33                        | 3.18                      | 1.52                          | 4.92         | 3.39       | 2.04                | 0.81                  | 1.27                 | -0.16        | -0.25                | 2.93        | 0.58                               | 3.89   | 1.18   | 2.99  | 4.92  | 0.37     | 23.35   | 0.66     |       |       |
|                                                                                                                                                                                              |                       | 1.83                                          | 1.84                                                  | 1.74                                              | 1.27                                                         | 1.77                          | 1.19                               | 2.16                                                      | 1.34  | 2.33                              | 1.08                                          | 2.29                | 2.47        | 2.3                         | 1.76                      | 1.42                          | 3.19         | 2.58       | 1.78                | 1.3                   | 2.04                 | 0.04         | -0.28                | 3.39        | 1.12                               | 4.16   | 0.75   | 1.52  | 1.64  | 0.51     | 21.73   | 1.19     |       |       |
|                                                                                                                                                                                              |                       | 4.91                                          | 6.65                                                  | 6.35                                              | 3.89                                                         | 4.84                          | 3.69                               | 8.32                                                      | 2.36  | 0.68                              | 1.01                                          | 6.21                | 5.24        | 2.53                        | 2.13                      | 2.59                          | 6.78         | 2.36       | 1.78                | 1.07                  | -0.13                | -0.2         | 0.36                 | 1.34        | 0.54                               | 2.64   | 0.41   | 3.44  | 1.74  | 2.39     | 42.2    | 1.18     |       |       |
|                                                                                                                                                                                              |                       | 0.82                                          | 6.34                                                  | 5.95                                              | 4.37                                                         | 7.44                          | 3.15                               | 16.43                                                     | 2.75  | 0.49                              | -0.02                                         | 0.48                | 0.9         | 1.66                        | 2.3                       | 1.42                          | 2.43         | 1.79       | 1.28                | 0.91                  | 0.39                 | -0.23        | -0.12                | 4.01        | 0.72                               | 1.61   | 0.88   | 1.65  | 0.17  | 0.97     | 12.62   | 0.68     |       |       |
| 1.67                                                                                                                                                                                         | 2.51                  | 2.29                                          | 2.06                                                  | 2.8                                               | 1.56                                                         | 3.74                          | 2.98                               | 2.37                                                      | 0.44  | 3.55                              | 4.26                                          | 13.07               | 5.38        | 4.94                        | 6.46                      | 4.46                          | 2.23         | 2.33       | 2.68                | 1.42                  | 0.56                 | 0.56         | 3.64                 | 0.94        | 2.53                               | 0.63   | 2.26   | -0.02 | 0.43  | 62.41    | 0.71    |          |       |       |
| TA-AML1_NI-1<br>TA-AML1_NI-3<br>TA-AML1_NI-5<br>TA-AML1_NI-6<br>TA-AML3_NI-4<br>TA-AML3_NI-5<br>TA-AML2_NI-4<br>TA-AML2_NI-3<br>TA-AML4_NI-4<br>TA-AML4_NI-6<br>TA-AML4_NI-5<br>TA-AML4_NI-5 | Healthy<br>Donors     | 1.22                                          | 4.15                                                  | 4.15                                              | 4.15                                                         | 3.43                          | 4.17                               | 4.3                                                       | 4.13  | 3.07                              | 0.28                                          | 4.05                | 2.82        | 2.68                        | 2.34                      | 1.24                          | 1.03         | 1.12       | 1.05                | 1.19                  | 0.99                 | 0.28         | 1                    | 2.02        | 1.49                               | 4.72   | 1.33   | 1.26  | 1.66  | 0.78     | 17.47   | 1.33     |       |       |
|                                                                                                                                                                                              |                       | 2.32                                          | 6.44                                                  | 6.3                                               | 6.15                                                         | 6.3                           | 5.98                               | 6.85                                                      | 6.55  | 9.07                              | 2.36                                          | 7.79                | 6           | 5.03                        | 4.2                       | 3.68                          | 3.11         | 1.82       | 2.07                | 2.1                   | 2.28                 | 0.89         | 1.21                 | 3.7         | 2.39                               | 8.06   | 2.47   | 6.88  | 3.77  | 1.03     | 21.47   | 5.39     |       |       |
|                                                                                                                                                                                              |                       | 2.21                                          | 6.61                                                  | 6.27                                              | 5.9                                                          | 5.57                          | 6.1                                | 7.25                                                      | 6.69  | 9.74                              | 3.17                                          | 8.91                | 6.43        | 5.26                        | 4.28                      | 3.64                          | 3.16         | 1.66       | 1.81                | 1.87                  | 1.21                 | 0.43         | 1.79                 | 3.69        | 3.03                               | 9      |        |       |       |          |         |          |       |       |



CD90 Median

|               | Ungated | CD34+CD38 <sup>low</sup> | CD49b <sup>neg</sup> CD34+CD38 <sup>low</sup> | CD33 <sup>neg</sup> CD34+CD38 <sup>low</sup> | HSC-90hi13 <sup>neg</sup> | MPP-90 <sup>low</sup> 33 <sup>neg</sup> | CMP-CD34+CD38 <sup>low</sup> ovCD33 <sup>mid</sup> | GMP   | 34 <sup>neg</sup> CD38+Undiff | 34 <sup>neg</sup> 38 <sup>neg</sup> Undiff | Myelo/Monoblast | ProMonocyte | CD14 <sup>neg</sup> Mono | CD14 <sup>+</sup> Mono | 11b+DR <sup>neg</sup> Mono | ProMyelocyte | Myelocytes | Meta-myelocytes | Mature Granulocyte | Pro-erythroblast | Erythroblast | Late Erythroblast | Pre-B Cells | Mature B cells CD20+CD19 <sup>+</sup> | Plasma | T Cell | pDC   | mDC   | Basophil | NK Cell | Platelet |       |
|---------------|---------|--------------------------|-----------------------------------------------|----------------------------------------------|---------------------------|-----------------------------------------|----------------------------------------------------|-------|-------------------------------|--------------------------------------------|-----------------|-------------|--------------------------|------------------------|----------------------------|--------------|------------|-----------------|--------------------|------------------|--------------|-------------------|-------------|---------------------------------------|--------|--------|-------|-------|----------|---------|----------|-------|
| TA-AML1_AML26 | 0       | 1.83                     | 1.7                                           | 1.68                                         | 4.44                      | 0.89                                    | 2.37                                               | 2.08  | -0.07                         | -0.27                                      | 1.29            | 0.11        | 0                        | -0.03                  | 1.23                       | -0.04        | 0          | -0.13           | -0.18              | -0.31            | -0.29        | -0.25             | 0.06        | -0.25                                 | 0.45   | -0.27  | 0.17  | -0.13 | -0.07    | -0.08   | 0.61     |       |
| TA-AML3_AML35 | 0.3     | 0.92                     | 0.92                                          | 0.9                                          | 4.19                      | 0.55                                    | 0.96                                               | 1.35  | 0.08                          | -0.23                                      | 1.08            | 0.26        | 0.08                     | 0.27                   | -0.12                      | -0.14        | -0.19      | -0.22           | -0.23              | -0.47            | -0.37        | -0.31             | 0.28        | -0.36                                 | 1      | -0.35  | 0.34  | -0.26 | -0.15    | -0.19   | 14.13    |       |
| TA-AML4_AML5  | 0.04    | 2.01                     | 1.84                                          | 1.84                                         | 4.63                      | 0.91                                    | 2.57                                               | 1.7   | -0.26                         | -0.37                                      | 0.96            | 0           | -0.18                    | -0.23                  | -0.29                      | 1.48         | -0.31      | -0.32           | -0.33              | 0.03             | -0.39        | -0.44             | -0.31       | -0.39                                 | 0.24   | -0.38  | 0.55  | -0.31 | -0.42    | -0.3    | 0.11     |       |
| TA-AML1_AML10 | 0.39    | 1.76                     | 1.71                                          | 1.4                                          | 4.34                      | 0.8                                     | 1.97                                               | 0.89  | -0.21                         | -0.29                                      | 0.73            | -0.1        | -0.17                    | -0.2                   | -0.21                      | 0            | -0.15      | -0.21           | -0.24              | -0.3             | -0.24        | -0.05             | 0.12        | -0.3                                  | 0      | -0.29  | -0.07 | -0.21 | -0.24    | 0       | -0.55    |       |
| TA-AML2_AML32 | 0.52    | 0.99                     | 0.98                                          | 0.94                                         | 4.07                      | 0.63                                    | 1.08                                               | 0.86  | -0.03                         | -0.35                                      | 0.84            | -0.19       | -0.22                    | -0.24                  | 0.64                       | 0.24         | -0.15      | -0.22           | -0.24              | -0.31            | -0.38        | -0.42             | -0.25       | -0.34                                 | 0.39   | -0.35  | 0.33  | -0.15 | -0.06    | -0.27   | 1.21     |       |
| TA-AML3_AML5  | -0.22   | 0.53                     | 0.49                                          | 0.47                                         | 3.9                       | 0.26                                    | 0.53                                               | 0.1   | -0.32                         | -0.36                                      | -0.24           | -0.16       | -0.19                    | -0.31                  | -0.19                      | -0.18        | -0.16      | -0.37           | -0.33              | 0.04             | -0.45        | -0.37             | -0.21       | -0.45                                 | -0.26  | -0.37  | -0.28 | -0.5  | -0.18    | -0.22   | X        |       |
| TA-AML3_AML3  | -0.31   | 0.75                     | 0.77                                          | 0.89                                         | 4.71                      | 0.53                                    | 0.55                                               | -0.01 | -0.32                         | -0.36                                      | -0.3            | -0.3        | -0.35                    | -0.31                  | -0.31                      | -0.29        | -0.31      | -0.28           | -0.26              | -0.44            | -0.39        | -0.34             | -0.18       | -0.4                                  | -0.19  | -0.4   | -0.17 | -0.31 | -0.45    | -0.25   | -0.33    |       |
| TA-AML2_AML4  | -0.3    | 0.36                     | 0.39                                          | 0.38                                         | 3.57                      | 0.19                                    | 0.46                                               | -0.08 | -0.31                         | -0.34                                      | -0.3            | -0.23       | 0.39                     | -0.23                  | -0.26                      | -0.28        | -0.34      | -0.31           | -0.28              | -0.28            | -0.32        | -0.39             | -0.27       | -0.28                                 | -0.37  | -0.21  | -0.36 | -0.28 | -0.32    | -0.27   | -0.26    | -0.74 |
| TA-AML4_AML1  | -0.26   | 0.14                     | 0.14                                          | 0.78                                         | 5.77                      | 0.27                                    | 0.13                                               | -0.27 | -0.37                         | -0.44                                      | -0.25           | -0.13       | -0.34                    | -0.31                  | -0.27                      | -0.22        | -0.28      | -0.36           | -0.3               | -0.57            | -0.45        | -0.32             | -0.67       | -0.49                                 | -0.24  | -0.41  | -0.53 | -0.41 | -0.26    | -0.35   | -0.47    |       |
| TA-AML1_AML27 | -0.1    | 0.96                     | 0.85                                          | 0.61                                         | 3.89                      | 0.33                                    | 0.98                                               | -0.02 | -0.26                         | -0.27                                      | -0.15           | -0.03       | -0.06                    | 0                      | -0.07                      | -0.15        | -0.06      | -0.19           | -0.27              | -0.45            | -0.31        | -0.28             | -0.19       | -0.31                                 | 0.42   | -0.28  | -0.19 | -0.08 | -0.17    | -0.14   | -0.26    |       |
| TA-AML3_AML7  | -0.31   | 0.71                     | 0.86                                          | 1.54                                         | 3.76                      | 1.06                                    | 0.26                                               | 0.6   | -0.33                         | -0.37                                      | -0.29           | -0.31       | -0.31                    | -0.3                   | -0.31                      | -0.28        | -0.33      | -0.34           | -0.31              | -0.21            | -0.43        | -0.4              | -0.52       | -0.43                                 | 0.1    | -0.41  | -0.37 | -0.52 | -0.33    | -0.23   | X        |       |
| TA-AML3_AML9  | -0.24   | 0.64                     | 0.59                                          | 0.31                                         | 3.93                      | 0.15                                    | 0.69                                               | 0.05  | -0.31                         | -0.39                                      | -0.2            | -0.19       | -0.26                    | -0.35                  | -0.26                      | -0.25        | -0.27      | -0.25           | -0.25              | -0.32            | -0.42        | -0.41             | -0.28       | -0.41                                 | -0.18  | -0.39  | -0.17 | -0.41 | -0.45    | -0.22   | -0.26    |       |
| TA-AML2_AML0  | -0.22   | 1.13                     | 0.98                                          | 0.93                                         | 5.03                      | 0.63                                    | 1.15                                               | -0.07 | -0.33                         | -0.36                                      | -0.14           | -0.22       | -0.32                    | -0.29                  | -0.33                      | -0.19        | -0.2       | -0.26           | -0.32              | -0.41            | -0.37        | -0.39             | -0.22       | -0.35                                 | -0.2   | -0.38  | -0.22 | -0.37 | -0.25    | -0.22   | -0.7     |       |
| TA-AML2_AML21 | 0.15    | 0.82                     | 0.72                                          | 0.5                                          | 3.88                      | 0.33                                    | 0.83                                               | 0.26  | -0.27                         | -0.29                                      | -0.07           | 0.38        | -0.12                    | -0.3                   | -0.11                      | -0.19        | -0.27      | -0.27           | -0.26              | -0.16            | -0.37        | -0.44             | -0.19       | -0.34                                 | -0.26  | -0.37  | -0.19 | -0.38 | -0.27    | -0.23   | -0.63    |       |
| TA-AML2_AML23 | 0.01    | 0.79                     | 0.77                                          | 0.61                                         | 3.87                      | 0.42                                    | 0.81                                               | 0.03  | -0.27                         | -0.32                                      | -0.04           | -0.77       | -0.19                    | -0.19                  | -0.27                      | 0.17         | -0.12      | -0.28           | -0.25              | -0.46            | -0.39        | -0.42             | -0.27       | -0.38                                 | -0.18  | -0.33  | -0.21 | -0.27 | -0.23    | -0.14   | X        |       |
| TA-AML2_AML20 | -0.25   | 0.28                     | 0.22                                          | 0.19                                         | 3.57                      | 0.12                                    | 0.28                                               | 0.08  | -0.32                         | -0.34                                      | -0.27           | -0.22       | -0.22                    | -0.33                  | -0.28                      | -0.3         | -0.3       | -0.3            | -0.29              | -0.4             | -0.35        | -0.36             | -0.26       | -0.35                                 | -0.32  | -0.36  | -0.27 | -0.32 | -0.23    | -0.19   | -0.48    |       |
| TA-AML2_AML39 | -0.21   | 0.64                     | 0.46                                          | 0.39                                         | 4.21                      | 0.23                                    | 0.65                                               | 0.4   | -0.3                          | -0.34                                      | -0.15           | -0.08       | -0.15                    | -0.2                   | -0.27                      | -0.21        | -0.22      | -0.23           | -0.22              | -0.15            | -0.31        | -0.3              | -0.12       | -0.38                                 | -0.07  | -0.37  | -0.25 | -0.28 | -0.11    | -0.2    | -0.54    |       |
| TA-AML4_AML37 | -0.36   | 0.14                     | 0.08                                          | -0.03                                        | 3.9                       | -0.1                                    | 0.28                                               | 0.09  | -0.41                         | -0.41                                      | -0.38           | -0.32       | -0.38                    | -0.37                  | -0.3                       | -0.35        | -0.32      | -0.32           | -0.38              | -0.47            | -0.53        | -0.26             | -0.48       | -0.1                                  | -0.47  | -0.5   | -0.31 | -0.32 | -0.31    | -0.66   |          |       |
| TA-AML4_AML38 | -0.42   | 0.3                      | -0.01                                         | -0.12                                        | 4.86                      | -0.23                                   | 0.33                                               | -0.28 | -0.41                         | -0.49                                      | -0.37           | -0.3        | -0.32                    | -0.31                  | -0.36                      | -0.29        | -0.36      | -0.32           | -0.39              | -0.44            | -0.49        | -0.5              | -0.42       | -0.46                                 | -0.06  | -0.48  | -0.45 | -0.43 | -0.12    | -0.31   | -0.45    |       |
| TA-AML4_AML40 | -0.41   | 0.12                     | 0                                             | -0.11                                        | 3.66                      | -0.23                                   | 0.44                                               | -0.2  | -0.43                         | -0.48                                      | -0.36           | -0.28       | -0.32                    | -0.31                  | -0.38                      | -0.36        | -0.35      | -0.46           | -0.44              | -0.44            | -0.45        | -0.52             | -0.42       | -0.35                                 | -0.08  | -0.48  | -0.45 | -0.29 | -0.19    | -0.4    | -0.31    | -0.42 |
| TA-AML3_AML6  | -0.22   | 0.34                     | 0.31                                          | 0.3                                          | 4.2                       | 0.13                                    | 0.33                                               | -0.07 | -0.33                         | -0.3                                       | -0.27           | -0.09       | 0.06                     | -0.01                  | -0.07                      | -0.1         | -0.21      | -0.16           | -0.24              | -0.09            | -0.41        | -0.32             | -0.31       | -0.42                                 | -0.18  | -0.4   | -0.36 | -0.26 | -0.21    | -0.13   | -0.37    |       |
| TA-AML2_AML31 | -0.31   | 0.02                     | 0                                             | -0.03                                        | 3.58                      | -0.08                                   | 0.04                                               | -0.12 | -0.34                         | -0.33                                      | -0.31           | -0.27       | -0.42                    | -0.43                  | -0.27                      | -0.24        | -0.24      | -0.25           | -0.3               | -0.34            | -0.38        | -0.12             | -0.27       | -0.39                                 | -0.11  | -0.37  | -0.35 | -0.31 | -0.25    | -0.22   | -0.24    |       |
| TA-AML4_AML8  | -0.41   | 1.94                     | 1.84                                          | 1.56                                         | 6.16                      | 0.51                                    | 2.24                                               | 0.76  | -0.29                         | -0.51                                      | -0.29           | -0.2        | -0.23                    | -0.2                   | -0.29                      | -0.38        | -0.43      | -0.4            | -0.39              | -0.35            | -0.44        | -0.56             | -0.2        | -0.33                                 | 0.04   | -0.46  | -0.43 | -0.36 | -0.13    | -0.18   | -0.42    |       |
| TA-AML1_AML13 | -0.28   | 0.13                     | 0.07                                          | 0                                            | 3.69                      | 0                                       | 0.47                                               | 0     | -0.3                          | -0.35                                      | -0.17           | -0.23       | -0.29                    | -0.25                  | -0.28                      | -0.17        | -0.25      | -0.29           | -0.24              | -0.11            | -0.24        | -0.37             | 0.22        | -0.25                                 | 0      | -0.33  | -0.33 | -0.28 | 0        | -0.23   | -0.27    |       |
| TA-AML3_AML36 | -0.36   | -0.13                    | -0.15                                         | -0.15                                        | 4.32                      | -0.19                                   | 0.1                                                | -0.07 | -0.39                         | -0.43                                      | -0.2            | -0.36       | -0.47                    | -0.42                  | -0.33                      | -0.28        | -0.13      | -0.3            | -0.32              | -0.35            | -0.38        | -0.44             | -0.71       | -0.43                                 | -0.26  | -0.41  | -0.35 | -0.29 | -0.38    | -0.36   | -0.36    |       |
| TA-AML2_AML33 | -0.06   | 1.18                     | 1.1                                           | 0.94                                         | 3.9                       | 0.57                                    | 1.4                                                | 0.68  | -0.1                          | -0.4                                       | 1.06            | 0.63        | -0.22                    | -0.26                  | -0.23                      | -0.12        | -0.26      | -0.22           | -0.2               | -0.38            | -0.4         | -0.3              | -0.31       | 0.63                                  | -0.34  | -0.25  | -0.33 | -0.19 | -0.21    | -0.22   | -0.22    |       |
| TA-AML2_AML42 | -0.37   | 0.46                     | 0.08                                          | 0.02                                         | 4.8                       | -0.11                                   | 2.23                                               | -0.04 | -0.37                         | -0.39                                      | -0.24           | -0.16       | -0.29                    | -0.35                  | -0.35                      | -0.31        | -0.37      | -0.37           | -0.35              | -0.37            | -0.33        | -0.4              | -0.26       | -0.39                                 | -0.19  | -0.4   | -0.43 | 0.63  | -0.27    | -0.13   | -0.46    |       |
| TA-AML4_AML14 | -0.38   | 0.56                     | 0.51                                          | 0.5                                          | 4.53                      | 0.11                                    | 1.86                                               | 0.59  | -0.46                         | -0.5                                       | -0.44           | -0.41       | -0.41                    | -0.45                  | -0.5                       | -0.18        | -0.45      | -0.44           | -0.37              | -0.41            | -0.47        | -0.5              | -0.4        | -0.47                                 | -0.47  | -0.48  | -0.32 | -0.43 | -0.49    | -0.4    | -0.47    |       |
| TA-AML4_AML15 | -0.32   | 0.05                     | -0.01                                         | -0.04                                        | 3.99                      | -0.14                                   | 0.25                                               | -0.21 | -0.43                         | -0.47                                      | -0.14           | 0.66        | -0.31                    | -0.29                  | -0.38                      | -0.02        | 0.56       | -0.39           | -0.35              | -0.26            | -0.36        | -0.49             | -0.12       | -0.45                                 | -0.36  | -0.47  | -0.49 | -0.4  | -0.41    | -0.37   | -0.38    |       |
| TA-AML2_AML22 | -0.03   | 0.55                     | 0.54                                          | 0.39                                         | 3.96                      | 0.25                                    | 0.56                                               | -0.05 | -0.17                         | -0.13                                      | 0.23            | 0.23        | -0.12                    | -0.19                  | -0.23                      | -0.15        | -0.26      | -0.31           | -0.34              | -0.39            | -0.39        | -0.4              | -0.27       | -0.34                                 | -0.22  | -0.37  | 0.21  | -0.23 | -0.49    | -0.23   | -0.25    |       |
| TA-AML1_AML18 | 1.18    | 1.22                     | 1.19                                          | 1.12                                         | 207.67                    | 0.26                                    | 1.22                                               | 1.01  | 0.6                           | -0.22                                      | 1.57            | 2.41        | 0                        | -0.08                  | 0                          | 1.19         | 0          | -0.23           | -0.24              | 0.13             | -0.25        | -0.23             | -0.28       | -0.28                                 | 8.79   | -0.28  | 0.79  | -0.28 | -0.3     | 0       | 0.47     |       |
| TA-AML3_AML4  | -0.15   | 1.37                     | 1.25                                          | 1.04                                         | 4.35                      | 0.5                                     | 2.27                                               | 0.66  | -0.24                         | -0.47                                      | 0.45            | -0.16       | -0.31                    | -0.19                  | -0.35                      | -0.29        | -0.32      | -0.33           | -0.35              | -0.14            | -0.42        | -0.43             | -0.58       | -0.42                                 | 0.26   | -0.39  | 0.11  | -0.18 | -0.52    | -0.2    | -0.37    |       |
| TA-AML2_AML19 | 0.65    | 1.03                     | 0.9                                           | 0.66                                         | 4.02                      | 0.44                                    | 1.23                                               | 0.33  | -0.24                         | -0.26                                      | 0.69            | 1.42        | 0.17                     | -0.21                  | 0.17                       | 0.03         | 0.25       | -0.15           | -0.23              | -0.12            | -0.32        | -0.34             | -0.21       | -0.29                                 | -0.09  | -0.33  | -0.08 | -0.22 | -0.24    | -0.22   | -0.22    |       |
| TA-AML2_AML29 | 0.61    | 1.18                     | 1.07                                          | 0.68                                         | 4.08                      | 0.43                                    | 1.44                                               | 0.25  | -0.28                         | -0.26                                      | 0.79            | 0.11        | -0.27                    | -0.13                  | -0.2                       | 1.43         | -0.11      | -0.16           | -0.24              | -0.36            | -0.33        | -0.09             | -0.2        | -0.33                                 | -0.17  | -0.34  | -0.1  | -0.01 | -0.15    | -0.17   | -0.28    |       |
| TA-AML2_AML1  | -0.35   | 1.98                     | 1.79                                          | 1.57                                         | 5.68                      | 0.57                                    | 3.35                                               | 0.73  | -0.35                         | -0.4                                       | -0.37           | -0.36       | -0.34                    | -0.4                   | -0.33                      | -0.35        | -0.36      | -0.35           | -0.39              | -0.4             | -0.36        | -0.39             | -0.27       | -0.35                                 | -0.23  | -0.29  | -0.22 | -0.32 | -0.32    | -0.33   |          |       |
| TA-AML4_AML25 | -0.37   | 1.47                     | 2.22                                          | 2.1                                          | 6.17                      | 0.53                                    | 0.52                                               | -0.06 | -0.38                         | -0.49                                      | -0.14           | -0.49       | -0.29                    | -0.4                   | -0.4                       | -0.39        | -0.36      | -0.35           | -0.33              | -0.39            | -0.47        | -0.44             | -0.2        | -0.47                                 | -0.32  | -0.47  | -0.4  | -0.47 | -0.52    | -0.26   | -0.41    |       |
| TA-AML1_NI-1  | -0.23   | 1.8                      | 2.16                                          | 2.16                                         | 6.18                      | 1.04                                    | 1.62                                               | 0.27  | -0.08                         |                                            |                 |             |                          |                        |                            |              |            |                 |                    |                  |              |                   |             |                                       |        |        |       |       |          |         |          |       |

|                                                                                                                                                                                                              |                      | CD33 Median                                   |                          |                                        |                                              |                   |                    |                      |       |                               |            |                 |             |              |            |           |              |            |                 |                    |                  |              |                   |             |                        |        |        |       |       |          |         |          |       |       |       |
|--------------------------------------------------------------------------------------------------------------------------------------------------------------------------------------------------------------|----------------------|-----------------------------------------------|--------------------------|----------------------------------------|----------------------------------------------|-------------------|--------------------|----------------------|-------|-------------------------------|------------|-----------------|-------------|--------------|------------|-----------|--------------|------------|-----------------|--------------------|------------------|--------------|-------------------|-------------|------------------------|--------|--------|-------|-------|----------|---------|----------|-------|-------|-------|
|                                                                                                                                                                                                              |                      | Ungated                                       | CD34+CD38 <sup>low</sup> | CD45RcAneg<br>CD34+CD38 <sup>low</sup> | CD33negCD34 <sup>+</sup> CD38 <sup>low</sup> | HSC-<br>90hi13neg | MPP-<br>90low33neg | CMP-<br>CD34+CD38mid | GMP   | 34negCD38 <sup>+</sup> Undiff | 34neg38neg | Myelo/Monoblast | ProMonocyte | CD14neg Mono | CD14+ Mono | 11b+DRneg | ProMyelocyte | Myelocytes | Meta-myelocytes | Mature Granulocyte | Pro-erythroblast | Erythroblast | Late Erythroblast | Pre-B Cells | Mature B<br>CD20+CD19+ | Plasma | T Cell | pDC   | mDC   | Basophil | NK Cell | Platelet |       |       |       |
| TA-AML1_AML26<br>TA-AML3_AML35<br>TA-AML3_AML5                                                                                                                                                               | CBF-AML<br>(t(8;21)) | 0                                             | 0                        | 0                                      | -0.06                                        | 0                 | -0.09              | 2.89                 | -0.02 | -0.03                         | -0.22      | 3.51            | 6.34        | 8.37         | 10.73      | 4.44      | -0.07        | 0          | 0.46            | 0.79               | -0.38            | -0.33        | -0.41             | 0           | -0.21                  | -0.18  | -0.32  | 2.56  | 1.38  | 5.67     | -0.25   | 0        | 0     |       |       |
|                                                                                                                                                                                                              |                      | 0.21                                          | 0.46                     | 0.46                                   | 0.15                                         | 0.28              | 0.13               | 3.55                 | 0.02  | 0.06                          | -0.31      | 3.73            | 12.21       | 15.62        | 17.6       | 10.56     | -0.04        | 0.44       | 1.02            | 1.05               | 0.19             | -0.39        | -0.39             | -0.39       | 0.06                   | -0.33  | -0.15  | -0.39 | 5.42  | 8.08     | 14.14   | -0.38    | -0.54 | -0.19 |       |
|                                                                                                                                                                                                              |                      | 1.12                                          | -0.11                    | -0.14                                  | -0.22                                        | -0.16             | -0.25              | 1.21                 | 0.04  | 0.54                          | 0.03       | 4.99            | 16.37       | 26.06        | 35.07      | 5.19      | 0.79         | 1.19       | 1.8             | 1.69               | 4.17             | -0.36        | -0.53             | -0.14       | -0.34                  | -0.21  | -0.38  | 6.88  | 2.51  | 14.92    | -0.34   | -0.19    | -0.19 |       |       |
| TA-AML1_AML10<br>TA-AML2_AML2                                                                                                                                                                                | CBF-AML<br>Inv(16)   | 5.52                                          | 3.81                     | 3.77                                   | 0.69                                         | 0.8               | 0.64               | 6.67                 | 0.53  | 0.54                          | 0.21       | 7.83            | 32.28       | 39.72        | 40.12      | 14.04     | 4.63         | 5.75       | 6.84            | 4.12               | 1.41             | -0.19        | 0.13              | 0.19        | -0.27                  | -0.08  | -0.26  | 3.55  | 27.52 | 7.09     | -0.14   | -0.52    | -0.52 |       |       |
|                                                                                                                                                                                                              |                      | 1.4                                           | 1.3                      | 1.3                                    | 0.5                                          | 0.55              | 0.49               | 4.43                 | 0.57  | -0.05                         | -0.17      | 5.17            | 55.15       | 73.14        | 55.14      | 5.96      | 3.76         | 5.53       | 4.87            | 3.28               | -0.25            | -0.37        | -0.38             | 0.01        | -0.27                  | -0.2   | -0.35  | 2.6   | 56.96 | 6.51     | -0.31   | -0.38    | -0.38 |       |       |
| TA-AML3_APL5<br>TA-AML3_APL3<br>TA-AML2_APL4<br>TA-AML4_APL1                                                                                                                                                 | APL (t(15;17))       | 17.9                                          | 17.64                    | 16.65                                  | 1.02                                         | 0.56              | 1.09               | 18.08                | 1.33  | 1.29                          | 1.01       | 18.82           | 35.62       | 60.84        | 56.33      | 26.54     | 19.39        | 16.56      | 3.74            | 4.45               | 11.89            | -0.31        | 5.75              | 5.85        | -0.38                  | -0.69  | -0.35  | 4.72  | 6.61  | 28.77    | 0.42    | X        | X     |       |       |
|                                                                                                                                                                                                              |                      | 1.68                                          | 0.46                     | 0.22                                   | -0.26                                        | -0.2              | -0.27              | 7.2                  | 0.45  | 0.6                           | 0.37       | 6.56            | 15.15       | 16.79        | 19.09      | 10.29     | 1.82         | 1.05       | 1.36            | 1.8                | -0.29            | -0.32        | -0.3              | 1.06        | -0.33                  | -0.21  | -0.4   | 0.43  | 2.92  | 5.34     | -0.32   | 0.04     | 0.04  |       |       |
|                                                                                                                                                                                                              |                      | 1.32                                          | 0.65                     | 0.3                                    | 0                                            | -0.33             | 0.04               | 3.73                 | 0.62  | 0.53                          | 0.41       | 3.95            | 4.75        | 5.22         | 4.83       | 5.14      | 1.15         | 1.6        | -0.05           | 0.01               | -0.31            | -0.21        | -0.18             | 0.64        | -0.32                  | -0.25  | -0.36  | 2.4   | 0.71  | 3.74     | -0.28   | 0.19     | 0.19  |       |       |
|                                                                                                                                                                                                              |                      | 18.24                                         | 16.28                    | 16.26                                  | 0.19                                         | 0.01              | 0.28               | 16.63                | 1.46  | 1.39                          | 0.4        | 19.47           | 26.41       | 40.77        | 19.07      | 25.68     | 17.89        | 1.54       | 1.6             | 2.19               | 13.48            | -0.38        | 0.08              | 6.17        | -0.39                  | -0.35  | -0.4   | 6.09  | 5.96  | 30.09    | -0.38   | -0.04    | -0.04 |       |       |
| TA-AML1_AML27<br>TA-AML3_AML7<br>TA-AML3_AML9<br>TA-AML2_AML20<br>TA-AML2_AML21<br>TA-AML2_AML23<br>TA-AML2_AML25<br>TA-AML2_AML29<br>TA-AML4_AML37<br>TA-AML4_AML38<br>TA-AML4_AML40                        | FLT3-ITD+ NK-AML     | 18.4                                          | 12.15                    | 10.43                                  | 1.22                                         | 1.2               | 1.22               | 12.92                | 1.32  | 1.19                          | 1.01       | 20.39           | 24.43       | 47.04        | 98.59      | 19.1      | 17.77        | 10.95      | 2.45            | 2.86               | 0.64             | -0.33        | -0.24             | 4.68        | -0.24                  | -0.16  | -0.28  | 3.23  | 14.54 | 32.49    | -0.21   | 0        | 0     |       |       |
|                                                                                                                                                                                                              |                      | 30.8                                          | 8.29                     | 4.9                                    | -0.21                                        | 0.08              | -0.22              | 15.68                | 0.69  | 0.85                          | -0.16      | 20.69           | 23.08       | 38.38        | 49.84      | 35.51     | 3.27         | 0.54       | 0.74            | 0.87               | 0.1              | -0.39        | -0.43             | 1.94        | -0.39                  | -0.14  | -0.4   | 4.07  | 21.8  | 36.99    | -0.33   | X        | X     |       |       |
|                                                                                                                                                                                                              |                      | 5.07                                          | 8.16                     | 7.91                                   | 1.15                                         | 1.14              | 1.15               | 9.45                 | 1.08  | 0.28                          | 0.01       | 12.27           | 15.75       | 32.26        | 38.59      | 7.95      | 8.53         | 6.21       | 6.91            | 4.43               | 1.74             | -0.4         | -0.45             | -0.28       | -0.32                  | -0.24  | -0.38  | 4.49  | 2.25  | 5.19     | -0.32   | -0.15    | -0.15 |       |       |
|                                                                                                                                                                                                              |                      | 3.3                                           | 3.54                     | 3.47                                   | 0.38                                         | 0.06              | 0.48               | 5.68                 | 0.94  | 0.16                          | 0.12       | 7.3             | 14.36       | 21.98        | 20.92      | 6.99      | 3.45         | 1.52       | 0.84            | 0.58               | -0.04            | -0.29        | -0.28             | 0.94        | -0.3                   | -0.1   | -0.34  | 6.03  | 2.59  | 3.21     | -0.14   | 0        | 0     |       |       |
|                                                                                                                                                                                                              |                      | 9.39                                          | 10.5                     | 10.38                                  | 1.43                                         | 1.53              | 1.42               | 10.92                | 1.45  | 0.9                           | 0.49       | 14.12           | 16.61       | 27.64        | 24.41      | 18.43     | 12.14        | 3.44       | 1.65            | 2.2                | -0.16            | -0.37        | -0.36             | -0.17       | -0.21                  | -0.09  | -0.35  | 4.29  | 2.16  | 26.72    | -0.3    | 0.64     | 0.64  |       |       |
|                                                                                                                                                                                                              |                      | 15.25                                         | 9.91                     | 9.65                                   | 1.29                                         | 1.33              | 1.29               | 10.79                | 1.34  | 0.77                          | 0.22       | 20.4            | 37.81       | 98.28        | 102.73     | 9.12      | 7.3          | 1.7        | 1.63            | 1.84               | -0.13            | -0.36        | -0.44             | 1.46        | -0.35                  | -0.13  | -0.34  | 3.3   | 8.42  | 17.43    | -0.27   | X        | X     |       |       |
|                                                                                                                                                                                                              |                      | 12.75                                         | 10.92                    | 8.51                                   | 1.27                                         | 1.05              | 1.3                | 11.47                | 1.01  | 1.12                          | 0.84       | 9.08            | 13.22       | 26.27        | 33.37      | 6.08      | 1.06         | 0.77       | 1.09            | 1.94               | -0.27            | -0.21        | -0.18             | 3.04        | -0.33                  | -0.2   | -0.35  | 5.07  | 6.58  | 2.74     | -0.29   | 0.06     | 0.06  |       |       |
|                                                                                                                                                                                                              |                      | 49.54                                         | 21.23                    | 15.1                                   | -0.18                                        | 0.38              | -0.2               | 29.67                | 1.38  | 0.9                           | 0.16       | 27.8            | 42.6        | 78.71        | 85.78      | 6.26      | 3.26         | 2.77       | 3.31            | 2.25               | 2.06             | -0.19        | -0.32             | 1.96        | -0.34                  | -0.16  | -0.34  | 2.63  | 25.46 | 7.93     | -0.02   | -0.58    | -0.58 |       |       |
|                                                                                                                                                                                                              |                      | 3.45                                          | 2.41                     | 2.08                                   | 0.47                                         | 0.53              | 0.47               | 5.75                 | 0.48  | 0.68                          | 0.53       | 6.74            | 14.99       | 22.31        | 33.07      | 11.67     | 4.1          | 3.71       | 6.83            | 1.78               | -0.08            | -0.31        | -0.15             | 0.58        | -0.42                  | -0.2   | -0.45  | 3.16  | 8.21  | 16.79    | 0.01    | -0.6     | -0.6  |       |       |
|                                                                                                                                                                                                              |                      | 3.4                                           | 18.22                    | 14.4                                   | 0.96                                         | -0.08             | 1                  | 18.71                | 0.8   | 0.82                          | -0.04      | 15.71           | 23.47       | 55.52        | 66.66      | 5.98      | 7.02         | 5.24       | 4.43            | 4.6                | -0.23            | -0.47        | -0.49             | 3.68        | -0.4                   | -0.25  | -0.47  | 4.34  | 4.88  | 9.8      | 19.24   | -0.39    | -0.39 |       |       |
|                                                                                                                                                                                                              |                      | -0.02                                         | 1.17                     | 1.05                                   | 0.24                                         | 0.54              | 0.22               | 4.55                 | 0.37  | 0.28                          | -0.26      | 4.74            | 5.69        | 7.35         | 5.01       | 4.08      | 0.77         | -0.25      | -0.28           | -0.23              | -0.09            | -0.39        | -0.42             | 0.13        | -0.26                  | -0.38  | -0.46  | 2.57  | 3.41  | 2.03     | -0.34   | -0.44    | -0.44 |       |       |
|                                                                                                                                                                                                              |                      | TA-AML3_AML6<br>TA-AML2_AML31<br>TA-AML4_AML8 | FLT3-TKD+ NK-AML         | 6.97                                   | 0.94                                         | 0.94              | 0.29               | 0.16                 | 0.31  | 4.04                          | 0.69       | 0.64            | 0.51        | 7.11         | 32.41      | 56.92     | 59.89        | 56.87      | 3.16            | 1.02               | 2.05             | 1.87         | -0.12             | -0.36       | -0.37                  | 0.67   | -0.38  | -0.13 | -0.37 | 1.34     | 8.06    | 5.52     | -0.27 | -0.22 | -0.22 |
|                                                                                                                                                                                                              |                      |                                               |                          | 8.4                                    | 5.71                                         | 5.67              | 1.31               | 1.18                 | 1.31  | 6.77                          | 1.26       | 1.27            | 1.23        | 9.41         | 9.48       | 16.74     | 15.33        | 7.43       | 7.49            | 5.9                | 1.02             | 1.06         | 3.3               | 4.59        | 2.53                   | 5.88   | -0.28  | -0.1  | -0.36 | 3.45     | 8.84    | 7.02     | -0.28 | -0.14 | -0.14 |
| -0.1                                                                                                                                                                                                         | 1.23                 |                                               |                          | 1.22                                   | 0.49                                         | 0.5               | 0.48               | 4.38                 | 0.7   | 0.55                          | -0.47      | 18.15           | 44.29       | 59.76        | 68.64      | 23.91     | 1.88         | 2.08       | 1.6             | 1.33               | -0.11            | -0.44        | -0.56             | -0.22       | -0.41                  | -0.23  | -0.46  | 3.21  | 6.85  | 14.01    | -0.36   | -0.35    | -0.35 |       |       |
| TA-AML1_AML13<br>TA-AML3_AML36<br>TA-AML2_AML33<br>TA-AML2_AML42<br>TA-AML4_AML14<br>TA-AML4_AML15                                                                                                           | FLT3wt NK-AML        | 0.56                                          | 1.02                     | 0.87                                   | 0                                            | 0                 | 0                  | 5.33                 | 0.06  | 0                             | 0          | 5.11            | 7.66        | 10.04        | 11.39      | 8.18      | 0.72         | 0.67       | 0.71            | 1.77               | -0.19            | -0.32        | -0.32             | 0.78        | -0.24                  | -0.32  | 2.43   | 0.94  | 6.49  | -0.29    | -0.27   | -0.27    |       |       |       |
|                                                                                                                                                                                                              |                      | -0.28                                         | -0.27                    | -0.28                                  | -0.3                                         | -0.33             | -0.3               | 3.03                 | -0.13 | -0.17                         | -0.35      | 3.95            | 5.27        | 6.43         | 6.52       | 4.04      | 0.08         | 0.38       | 0.23            | 0.43               | -0.34            | -0.4         | -0.43             | -0.48       | -0.35                  | -0.38  | -0.41  | 0.44  | -0.14 | 1.81     | -0.4    | -0.35    | -0.35 |       |       |
|                                                                                                                                                                                                              |                      | 3.32                                          | 2.73                     | 2.57                                   | 0.8                                          | 1.17              | 0.71               | 5.06                 | 1.07  | -0.03                         | -0.34      | 7.79            | 13.45       | 30.74        | 51.27      | 8.03      | 1.34         | 1.96       | 2.89            | 3.68               | 0.37             | -0.34        | -0.41             | -0.17       | -0.21                  | -0.08  | -0.34  | 2.34  | 6.4   | 6.09     | -0.24   | -0.26    | -0.26 |       |       |
|                                                                                                                                                                                                              |                      | -0.25                                         | 0.34                     | -0.1                                   | -0.16                                        | 0.24              | -0.17              | 5.85                 | -0.24 | -0.31                         | -0.34      | 3.72            | 4.43        | 4.83         | 5.74       | 1.58      | -0.24        | -0.23      | -0.03           | -0.31              | -0.35            | -0.42        | 0.4               | -0.34       | -0.41                  | -0.38  | 0.34   | 5.18  | 3.93  | -0.36    | -0.31   | -0.31    |       |       |       |
|                                                                                                                                                                                                              |                      | -0.15                                         | -0.39                    | -0.39                                  | -0.42                                        | -0.32             | -0.43              | 2.5                  | -0.38 | -0.42                         | -0.19      | 8.41            | 24.5        | 26.97        | 29.96      | 18.75     | -0.01        | 0.79       | 1.33            | 2.89               | -0.28            | -0.41        | -0.45             | -0.37       | -0.38                  | -0.44  | -0.46  | 0.92  | 6.6   | 9.63     | -0.44   | -0.59    | -0.59 |       |       |
| 0.55                                                                                                                                                                                                         | 1.28                 | 0.73                                          | -0.1                     | -0.13                                  | -0.09                                        | 5.91              | 0.43               | 0.26                 | -0.04 | 5.21                          | 8.85       | 15.16           | 33.14       | 8.79         | 2.5        | 6.15      | 0.89         | 1.11       | -0.15           | -0.39              | -0.49            | -0.69        | -0.41             | -0.29       | -0.47                  | 3.21   | 4.6    | 5.26  | -0.41 | -0.45    | -0.45   |          |       |       |       |
| TA-AML2_AML22<br>TA-AML1_AML18<br>TA-AML3_AML4<br>TA-AML2_AML19<br>TA-AML2_AML29<br>TA-AML2_AML41<br>TA-AML4_AML25                                                                                           | MLL (t(10;11))       | 6.26                                          | 10.61                    | 10.61                                  | 0.87                                         | 0.71              | 0.88               | 11.47                | 1.25  | 1.13                          | 1.01       | 9.35            | 13.81       | 17.75        | 14.61      | 3.08      | 0.9          | 0.46       | 0.34            | 0.18               | -0.29            | -0.38        | -0.38             | 2.18        | -0.29                  | -0.13  | -0.36  | 9.89  | 3.06  | 1.73     | -0.28   | -0.18    | -0.18 |       |       |
|                                                                                                                                                                                                              |                      | 14.31                                         | 6.19                     | 6.16                                   | 0.89                                         | 0.35              | 1.04               | 8.52                 | 1.32  | 0.1                           | -0.26      | 17.41           | 18.4        | 33.33        | 43.02      | 7.37      | 10.5         | 6.03       | 4.78            | 5.62               | 0.37             | -0.3         | -0.35             | -0.18       | -0.23                  | -0.03  | -0.27  | 4.05  | 6.03  | 5.15     | -0.15   | 0        | 0     |       |       |
|                                                                                                                                                                                                              |                      | 1.47                                          | 0.59                     | 0.52                                   | 0.07                                         | 0.38              | -0.02              | 3.79                 | 0.2   | -0.14                         | -0.35      | 7.81            | 30.3        | 51.21        | 52.89      | 15.69     | 4.43         | 5.72       | 7.62            | 2.64               | 0.07             | -0.4         | -0.42             | -0.13       | -0.34                  | -0.26  | -0.37  | 0.89  | 5.66  | 7.53     | -0.35   | -0.36    | -0.36 |       |       |
|                                                                                                                                                                                                              |                      | 4.17                                          | 3.7                      | 3.49                                   | 0.73                                         | 0.89              | 0.71               | 6.05                 | 0.74  | -0.04                         | 0.19       | 8.8             | 7.89        | 14.02        | 40.2       | 6.06      | 7.36         | 8.76       | 14.97           | 12.86              | 1.67             | -0.32        | -0.38             | 0.1         | -0.21                  | -0.17  | -0.33  | 4.83  | 3.31  | 7.62     | -0.19   | -0.26    | -0.26 |       |       |
|                                                                                                                                                                                                              |                      | 4.18                                          | 4.17                     | 3.98                                   | 0.78                                         | 0.98              | 0.75               | 6.46                 | 0.74  | 0.14                          | -0.12      | 10.82           | 38.51       | 68.07        | 46.88      | 7.09      | 8.51         | 3.12       | 4.23            | 3.24               | -0.11            | -0.3         | 0.05              | 0.02        | -0.32                  | -0.23  | -0.35  | 2.76  | 6.51  | 17.95    | -0.24   | -0.27    | -0.27 |       |       |
|                                                                                                                                                                                                              |                      | 0.77                                          | 0.4                      | 0.25                                   | -0.06                                        | 0.18              | -0.13              | 3.55                 | 0.19  | -0.21                         | -0.32      | 6.2             | 11.44       | 13.85        | 13.56      | 6.57      | 0.46         | 2.66       | 3.64            | 1.37               | -0.22            | -0.36        | -0.53             | -0.19       | -0.39                  | -0.26  | -0.34  | 1.55  | 0.71  | 7.66     | -0.37   | -0.37    | -0.37 |       |       |
| 0.23                                                                                                                                                                                                         | 0.11                 | -0.08                                         | -0.22                    | -0.12                                  | -0.28                                        | 3.05              | -0.09              | -0.25                | -0.4  | 4.07                          | 12.12      | 19.59           | 21.13       | 13.85        | -0.21      | 0.38      | 1.58         | 2.39       | -0.46           | -0.45              | -0.55            | -0.07        | -0.43             | -0.35       | -0.46                  | -0.13  | 2      | 2.96  | -0.35 | -0.4     | -0.4    |          |       |       |       |
| TA-AML1_N1-5<br>TA-AML1_Ni-3<br>TA-AML1_Ni-5<br>TA-AML1_Ni-6<br>TA-AML3_Ni-4<br>TA-AML3_Ni-4<br>TA-AML3_Ni-5<br>TA-AML2_Ni-6<br>TA-AML2_Ni-3<br>TA-AML2_Ni-4<br>TA-AML4_Ni-6<br>TA-AML4_Ni-4<br>TA-AML4_Ni-5 | Healthy Donors       | 5.18                                          | 2.65                     | 2.06                                   | 0.67                                         | 0.81              | 0.58               | 5.64                 | 0.13  | 0                             | -0.31      | 18.91           | 38.6        | 42.88        | 75.77      | 13.48     | 1.72         | 3.8        | 5.87            | 7.36               | -0.09            | -0.25        | -0.36             | -0.15       | -0.21                  | -0.02  | -0.32  | 2.66  | 8.56  | 6.56     | -0.19   | -0.27    | -0.27 |       |       |
|                                                                                                                                                                                                              |                      | 1.22                                          | 1.22                     | 1.04                                   | 0.29                                         | 0.31              | 0.27               | 3.99                 | 0.73  | 0.38                          | -0.19      | 9.25            | 15.51       | 17.8         | 26.24      | 11.68     | 0.94         | 1.36       | 1.45            | 1.49               | -0.14            | -0.19        | -0.28             | -0.11       | -0.24                  | -0.05  | -0.31  | 2.12  | 4.47  | 3.8      | -0.18   | -0.2     | -0.2  |       |       |
|                                                                                                                                                                                                              |                      |                                               |                          |                                        |                                              |                   |                    |                      |       |                               |            |                 |             |              |            |           |              |            |                 |                    |                  |              |                   |             |                        |        |        |       |       |          |         |          |       |       |       |

**CD16 Median**

|                                                                                                                                                                                                                                                              |                                   | Ungated | CD34+CD38 <sup>low</sup> | CD49b <sup>neg</sup> CD38 <sup>low</sup> | CD33 <sup>neg</sup> CD4 <sup>+</sup> CD38 <sup>low</sup> | HSC-90h133 <sup>neg</sup> | MPP-90low33 <sup>ne</sup> g | CMP-CD34 <sup>+</sup> CD33 <sup>mid</sup> | GMP   | 34negCD38 <sup>+</sup> Undiff | 34neg38 <sup>neg</sup> Myelo/Mon | Myelo/Mon | ProMonocyte | CD14 <sup>neg</sup> Mono | CD14 <sup>+</sup> Mono | 11b+DR <sup>neg</sup> Mono | ProMyelocyte | Myelocytes | Meta-myelocytes | Mature Granulocyte | Pro-erythroblast | Erythroblast | Late Erythroblast | Pre-B Cells | Mature B CD20 <sup>+</sup> CD19 <sup>+</sup> | Plasma | T Cell | pDC   | mDC    | Basophil | NK Cell | Platelet |
|--------------------------------------------------------------------------------------------------------------------------------------------------------------------------------------------------------------------------------------------------------------|-----------------------------------|---------|--------------------------|------------------------------------------|----------------------------------------------------------|---------------------------|-----------------------------|-------------------------------------------|-------|-------------------------------|----------------------------------|-----------|-------------|--------------------------|------------------------|----------------------------|--------------|------------|-----------------|--------------------|------------------|--------------|-------------------|-------------|----------------------------------------------|--------|--------|-------|--------|----------|---------|----------|
| TA-AML1_AML26<br>TA-AML3_AML35<br>TA-AML4_AML5<br>(16;21)                                                                                                                                                                                                    | CBF-AML                           | 2.41    | -0.16                    | -0.21                                    | -0.21                                                    | -0.16                     | -0.23                       | 0                                         | -0.17 | 0.08                          | 0                                | 0         | 0.71        | 1.15                     | 1.94                   | 1.85                       | 2.04         | 3.2        | 6.97            | 27.06              | -0.17            | 0.03         | -0.06             | 0           | 0                                            | -0.13  | 1.14   | 0.03  | 48.79  | 1.46     | 59.04   | 9.49     |
|                                                                                                                                                                                                                                                              |                                   | 0.42    | -0.37                    | -0.38                                    | -0.38                                                    | -0.37                     | -0.38                       | -0.31                                     | -0.31 | -0.16                         | -0.34                            | -0.25     | 0.76        | 1.26                     | 0.93                   | 1.29                       | 1.65         | 3.64       | 5.54            | 28.02              | -0.45            | -0.14        | -0.1              | 0.75        | -0.06                                        | -0.12  | 0.89   | 0.01  | 7.44   | 0.59     | 11.59   | 1.51     |
|                                                                                                                                                                                                                                                              |                                   | 0.64    | -0.16                    | -0.19                                    | -0.19                                                    | -0.12                     | -0.22                       | -0.06                                     | -0.21 | 0.34                          | 0.19                             | -0.07     | 0.31        | 0.58                     | 0.87                   | 1.24                       | 0.52         | 2.27       | 6.82            | 40.71              | -0.07            | 0.08         | -0.23             | 0.5         | -0.09                                        | -0.16  | 0.85   | 0     | 18.19  | 1.37     | 8.07    | 1.58     |
| TA-AML2_AML10<br>TA-AML2_AML32                                                                                                                                                                                                                               | CBF-AML<br>Inv(16)                | 0.75    | 0.24                     | 0.21                                     | 0.21                                                     | 0.35                      | 0.16                        | 0.25                                      | 0.44  | 0.42                          | 0.01                             | 0.37      | 0.5         | 0.61                     | 1.41                   | 1.57                       | 1.08         | 2.71       | 6.22            | 40.08              | -0.24            | 0.35         | 1.43              | 0.15        | 0                                            | 0      | 0      | 17.72 | 1.21   | 65.84    | 7.18    |          |
|                                                                                                                                                                                                                                                              |                                   | 0.11    | -0.08                    | -0.08                                    | -0.09                                                    | 0                         | -0.1                        | -0.07                                     | -0.04 | -0.1                          | -0.33                            | 0         | 0.52        | 0.68                     | 0.98                   | 1.58                       | 1.58         | 0.38       | 2.42            | 5.92               | 34.61            | -0.17        | -0.05             | 0.3         | 1.08                                         | -0.08  | -0.23  | 0.88  | 0.14   | 6.64     | 1.2     | 104.81   |
| TA-AML3_APL5<br>TA-AML3_APL3<br>TA-AML2_APL4<br>TA-AML4_APL1                                                                                                                                                                                                 | APL (15;17)                       | 0.51    | 0.44                     | 0.37                                     | 0.15                                                     | 0.48                      | 0.11                        | 0.44                                      | 0.19  | 0.46                          | 0.16                             | 0.47      | 0.69        | 0.67                     | 1.09                   | 0.76                       | 0.91         | 2.08       | 8.43            | 42.08              | -0.06            | 0.06         | 0.42              | 1.23        | -0.12                                        | 0.01   | 0.81   | -0.36 | 83.87  | 0.9      | 6.03    | X        |
|                                                                                                                                                                                                                                                              |                                   | 2.21    | 0.3                      | 0.27                                     | 0.05                                                     | 0.08                      | 0.05                        | 0.84                                      | 0.16  | 1.05                          | 0.65                             | 1.25      | 0.34        | 0.44                     | 1.24                   | 1.63                       | 1.87         | 2.47       | 9.94            | 32.21              | -0.06            | 0.21         | 0.07              | 0.82        | 0.07                                         | -0.15  | 0.67   | 0.86  | 45.61  | 1.86     | 12.23   | 1.25     |
|                                                                                                                                                                                                                                                              |                                   | 0.47    | 0.49                     | 0.24                                     | 0.2                                                      | 0.92                      | 0.1                         | 0.67                                      | 0.52  | 0.43                          | 0.18                             | 0.42      | 0.3         | 0.61                     | 1.07                   | 0.76                       | 0.78         | 1.63       | 9.24            | 23.39              | -0.06            | 0.15         | 1                 | 0.39        | -0.17                                        | -0.2   | 0.75   | 0.63  | 17.3   | 0.73     | 4.76    | 0.95     |
|                                                                                                                                                                                                                                                              |                                   | 0.36    | 0.11                     | 0.09                                     | -0.04                                                    | 0                         | -0.09                       | 0.11                                      | -0.03 | -0.01                         | -0.28                            | 0.24      | 0.39        | 0.25                     | 0.85                   | 0.75                       | 0.83         | 2.14       | 10.31           | 28.58              | -0.6             | -0.14        | 0.12              | 1.54        | -0.12                                        | -0.31  | 0.34   | -0.12 | 86.77  | 0.82     | 33.75   | 4.71     |
| TA-AML1_AML27<br>TA-AML3_AML7<br>TA-AML3_AML9<br>TA-AML2_AML20<br>TA-AML2_AML21<br>TA-AML2_AML23<br>TA-AML2_AML2<br>TA-AML2_AML39<br>TA-AML4_AML37<br>TA-AML4_AML38<br>TA-AML4_AML40                                                                         | FLT3-ITD+ NK-AML                  | 0.17    | 0.3                      | 0.19                                     | 0.05                                                     | 0.26                      | 0                           | 0.32                                      | 0.14  | 0.24                          | 0.03                             | 0.08      | 0.38        | 0.47                     | 1.08                   | 1.61                       | 1.2          | 1.89       | 6.09            | 38.61              | -0.12            | 0            | 1.2               | 0.33        | 0                                            | 0      | 0.86   | -0.13 | 9.64   | 2.05     | 17.23   | 4.39     |
|                                                                                                                                                                                                                                                              |                                   | 1.03    | -0.14                    | -0.19                                    | -0.22                                                    | -0.11                     | -0.3                        | -0.09                                     | -0.33 | 0                             | -0.23                            | -0.12     | 0.08        | 0.63                     | 1.09                   | 0.83                       | 0.87         | 1.94       | 5.98            | 26.71              | -0.04            | 0.28         | 0.07              | 0.25        | -0.09                                        | 0.81   | 0.74   | -0.24 | 9.6    | 0.52     | 21.61   | X        |
|                                                                                                                                                                                                                                                              |                                   | 2.33    | 0.57                     | 0.53                                     | 0.45                                                     | 0.77                      | 0.4                         | 0.59                                      | 0.7   | 0.61                          | -0.03                            | 0.52      | 0.34        | 0.67                     | 0.99                   | 1.42                       | 1.4          | 3.19       | 5.28            | 52.41              | 0.01             | 0.14         | 0.06              | 0.2         | -0.04                                        | -0.11  | 0.71   | -0.14 | 84.5   | 1.3      | 7.09    | 2.67     |
|                                                                                                                                                                                                                                                              |                                   | -0.04   | -0.03                    | -0.1                                     | -0.2                                                     | 0.59                      | -0.25                       | -0.02                                     | -0.13 | -0.07                         | -0.11                            | -0.01     | 0.35        | 0.9                      | 1.02                   | 1.58                       | 1.58         | 4.32       | 74.63           | -0.05              | 0                | 0.11         | -0.02             | -0.03       | -0.15                                        | -0.15  | -0.45  | 24.98 | -0.01  | 6.43     | 1.62    |          |
|                                                                                                                                                                                                                                                              |                                   | 0.28    | 0.14                     | 0.1                                      | -0.06                                                    | -0.02                     | -0.07                       | 0.15                                      | 0.14  | -0.02                         | -0.13                            | 0.18      | 0.49        | 0.77                     | 0.88                   | 0.47                       | 1.13         | 1.77       | 9.38            | 54.34              | -0.27            | -0.05        | -0.04             | -0.09       | -0.14                                        | -0.21  | 0.39   | 0.08  | 162.16 | 0.6      | 23.7    | 0.37     |
|                                                                                                                                                                                                                                                              |                                   | -0.05   | 0.11                     | 0.09                                     | 0.04                                                     | 0.05                      | 0.03                        | 0.12                                      | -0.08 | 0.02                          | -0.1                             | -0.13     | -0.02       | 0.31                     | 0.76                   | 1.44                       | 0.65         | 2.53       | 7.68            | 29.95              | -0.24            | -0.14        | -0.18             | 0           | -0.08                                        | -0.27  | 0.8    | -0.24 | 52.59  | 0.24     | 15.9    | X        |
|                                                                                                                                                                                                                                                              |                                   | 1.58    | 0.94                     | 0.69                                     | 0.41                                                     | -0.13                     | 0.45                        | 0.97                                      | -0.13 | 0.27                          | 0.06                             | 0.29      | 0.58        | 0.47                     | 0.88                   | 1.29                       | 1.07         | 1.45       | 5.48            | 39.06              | -0.11            | 0.33         | -0.22             | 0.78        | -0.04                                        | -0.1   | 0.89   | 0.75  | 89.35  | 0.54     | 86.66   | 3.89     |
|                                                                                                                                                                                                                                                              |                                   | 0.79    | 0.2                      | 0                                        | -0.11                                                    | 1.1                       | -0.13                       | 0.24                                      | -0.09 | 0.5                           | -0.1                             | -0.15     | -0.13       | 0.03                     | 0.67                   | 1.08                       | 1.18         | 2.12       | 5.04            | 48.69              | -0.03            | 0.12         | 0.7               | 0.27        | -0.13                                        | -0.27  | 0.67   | 0.07  | 14.31  | 0.21     | 10.92   | 4.13     |
|                                                                                                                                                                                                                                                              |                                   | 1.33    | 1.34                     | 1.16                                     | 0.98                                                     | 1.3                       | 0.96                        | 1.61                                      | 0.71  | 0.98                          | 0.86                             | 1.19      | 1.31        | 0.81                     | 1.22                   | 1.31                       | 1.55         | 3.02       | 4.99            | 44.98              | 0.73             | 0.11         | 0.39              | 2.28        | -0.25                                        | -0.26  | 0.81   | 0.04  | 8.54   | 1.72     | 13.35   | 5.57     |
|                                                                                                                                                                                                                                                              |                                   | 0.18    | 0.42                     | 0.17                                     | 0.2                                                      | 0.45                      | 0.2                         | 0.42                                      | -0.32 | -0.01                         | -0.26                            | -0.01     | 0.39        | 0.39                     | 0.71                   | 2.11                       | 1.39         | 2.37       | 4.47            | 37.84              | -0.22            | -0.04        | -0.08             | 0.95        | -0.14                                        | -0.21  | 0.38   | -0.2  | 67.5   | 2.22     | 0.9     | 0.37     |
| 0.58                                                                                                                                                                                                                                                         | -0.09                             | -0.12   | -0.16                    | -0.1                                     | -0.16                                                    | 0.2                       | 0.09                        | -0.11                                     | -0.33 | 0.16                          | 0.73                             | 0.6       | 1.07        | 1.83                     | 1.42                   | 2.44                       | 6.51         | 24.51      | -0.22           | 0.26               | 0.34             | -0.12        | -0.19             | -0.17       | 0.61                                         | -0.16  | 11.12  | 0.99  | 1.74   | 1.67     |         |          |
| TA-AML3_AML6<br>TA-AML2_AML31<br>TA-AML4_AML8                                                                                                                                                                                                                | FLT3-TKD+<br>NK-AML               | 0.89    | 0.34                     | 0.32                                     | 0.25                                                     | 0.26                      | 0.25                        | 0.37                                      | 0.75  | 0.68                          | 0.26                             | 0.72      | 0.24        | 0.57                     | 1.02                   | 1.01                       | 1.46         | 3.64       | 4.52            | 28.68              | 0.36             | 0.29         | -0.16             | 0.95        | 0.01                                         | -0.07  | 0.91   | 0     | 10.42  | 0.74     | 31.39   | 4.92     |
|                                                                                                                                                                                                                                                              |                                   | 0.35    | 0.48                     | 0.47                                     | 0.4                                                      | 0.47                      | 0.4                         | 0.49                                      | 0.53  | 0.33                          | 0.31                             | 0.34      | 0.56        | 0.75                     | 1.31                   | 1.05                       | 0.74         | 1.65       | 8.18            | 32.46              | -0.17            | 0.59         | 0.14              | 0.71        | -0.08                                        | -0.22  | 0.54   | 0.03  | 10.3   | 1.11     | 33.91   | 0.82     |
|                                                                                                                                                                                                                                                              |                                   | 2.42    | -0.11                    | -0.12                                    | 0.02                                                     | -0.23                     | 0.08                        | -0.21                                     | -0.2  | 0.1                           | -0.22                            | -0.2      | 0.26        | 0.72                     | 0.82                   | 0.82                       | 0.83         | 2.21       | 8.67            | 42.48              | -0.44            | -0.12        | -0.16             | 0.52        | 1.16                                         | -0.21  | 0.63   | -0.2  | 30.9   | 0.61     | 16.8    | 4.51     |
| TA-AML1_AML13<br>TA-AML3_AML36<br>TA-AML2_AML33<br>TA-AML2_AML42<br>TA-AML4_AML14<br>TA-AML4_AML15                                                                                                                                                           | FLT3wt NK-AML                     | 1.61    | 0.3                      | 0.19                                     | 0.03                                                     | 0.77                      | 0                           | 0.87                                      | 0.35  | 0.29                          | 0                                | 0.22      | 0           | 0.8                      | 2.14                   | 1.21                       | 1.03         | 1.25       | 4.76            | 25.48              | -0.42            | 0.28         | 0.5               | 2.22        | 0                                            | 0.08   | 1.02   | 0.06  | 94.79  | 6.33     | 3.51    | 2.93     |
|                                                                                                                                                                                                                                                              |                                   | 0.8     | -0.16                    | -0.18                                    | -0.19                                                    | -0.1                      | -0.2                        | 0.66                                      | -0.15 | -0.1                          | -0.18                            | 0.39      | 0.47        | 1.24                     | 1.66                   | 1.37                       | 0.85         | 1.4        | 6.36            | 29.79              | -0.32            | -0.01        | -0.13             | 0.71        | -0.15                                        | -0.17  | 0.63   | 1.73  | 33.03  | 0.39     | 7.04    | 1.05     |
|                                                                                                                                                                                                                                                              |                                   | 2.49    | 0.22                     | 0.14                                     | 0.01                                                     | 0.38                      | -0.08                       | 0.34                                      | -0.01 | -0.1                          | -0.33                            | 0.17      | 0.34        | 0.57                     | 0.98                   | 1.78                       | 1.09         | 1.55       | 8.41            | 55.37              | -0.11            | -0.03        | -0.04             | -0.02       | 0.06                                         | 0      | 0.89   | 0.55  | 38.61  | 0.97     | 6.32    | 4.64     |
|                                                                                                                                                                                                                                                              |                                   | 0.91    | 0                        | -0.15                                    | -0.23                                                    | -0.04                     | -0.37                       | 2.29                                      | 0.31  | -0.14                         | -0.17                            | 0.12      | 0.41        | 0.84                     | 1.84                   | 1.08                       | 0.57         | 1.19       | 4.65            | 34.24              | -0.23            | 0.12         | 0.02              | 0.91        | -0.03                                        | -0.22  | 0.58   | 0.23  | 6.04   | 2.42     | 0.64    | 1.4      |
|                                                                                                                                                                                                                                                              |                                   | 0.41    | -0.3                     | -0.31                                    | -0.31                                                    | -0.15                     | -0.34                       | -0.1                                      | -0.19 | -0.21                         | -0.17                            | -0.06     | 0.34        | 0.07                     | 0.97                   | 0.4                        | 0.45         | 3.28       | 8.76            | 26.87              | -0.34            | -0.19        | -0.21             | 0.03        | -0.2                                         | -0.26  | 0.01   | -0.07 | 12.35  | 1.69     | 5.98    | 0.89     |
| 0.15                                                                                                                                                                                                                                                         | -0.17                             | -0.21   | -0.25                    | -0.05                                    | -0.26                                                    | -0.07                     | -0.18                       | -0.15                                     | -0.24 | 0.11                          | 0.43                             | 1.27      | 1.2         | 0.98                     | 0.75                   | 1.16                       | 6.74         | 25.76      | -0.3            | 0.11               | 0.29             | -0.39        | -0.13             | -0.28       | 0.33                                         | 1.02   | 10.36  | 0.74  | 0.79   | 1.86     |         |          |
| TA-AML2_AML22<br>TA-AML1_AML18<br>TA-AML3_AML4<br>TA-AML2_AML19<br>TA-AML2_AML29<br>TA-AML2_AML41<br>TA-AML4_AML25                                                                                                                                           | ML (10;11)<br>ADK-AML<br>Emp/Mono | -0.3    | -0.39                    | -0.4                                     | -0.36                                                    | -0.2                      | -0.37                       | -0.4                                      | -0.4  | -0.37                         | -0.38                            | -0.38     | -0.22       | 0                        | 0.72                   | 1.46                       | 0.41         | 1.5        | 5.91            | 42.54              | -0.14            | -0.05        | 0.09              | -0.43       | -0.04                                        | -0.13  | 0.41   | -0.35 | 14.48  | 0.29     | 17.62   | 5.34     |
|                                                                                                                                                                                                                                                              |                                   | 0.16    | -0.01                    | -0.02                                    | -0.13                                                    | -0.17                     | -0.11                       | 0                                         | 0     | 0                             | -0.2                             | 0         | 0.51        | 0.27                     | 1.35                   | 1.23                       | 0.77         | 1.72       | 8.57            | 48.48              | -0.01            | 0            | 0                 | 0.11        | 0                                            | 0      | 0.9    | -0.21 | 43.5   | 1.32     | 4.15    | 3.63     |
|                                                                                                                                                                                                                                                              |                                   | 0.38    | -0.26                    | -0.28                                    | -0.3                                                     | -0.21                     | -0.33                       | -0.16                                     | -0.25 | -0.16                         | -0.34                            | -0.16     | -0.07       | 0.35                     | 0.98                   | 0.8                        | 0.69         | 1.35       | 3.52            | 37.01              | -0.02            | -0.02        | 0                 | 0.52        | 0                                            | -0.08  | 0.59   | 0.26  | 29.38  | 1.3      | 2.95    | 1.35     |
|                                                                                                                                                                                                                                                              |                                   | 0.25    | 0                        | -0.09                                    | -0.09                                                    | 0.03                      | -0.11                       | 0.04                                      | -0.07 | -0.04                         | 0.03                             | -0.1      | 0.55        | 0.79                     | 0.85                   | 1.54                       | 0.53         | 1.39       | 5.3             | 88.08              | -0.15            | -0.01        | -0.18             | -0.09       | -0.17                                        | -0.23  | 0.54   | 1.42  | 24.91  | 1.49     | 3.04    | 5.45     |
|                                                                                                                                                                                                                                                              |                                   | 0       | -0.09                    | -0.11                                    | -0.18                                                    | -0.07                     | -0.2                        | -0.04                                     | -0.13 | -0.07                         | -0.08                            | -0.07     | 0.25        | 0.58                     | 1.07                   | 1.17                       | 0.56         | 2.88       | 7.35            | 79.17              | -0.2             | -0.07        | -0.07             | 0.1         | 0.09                                         | -0.12  | 0.74   | -0.14 | 45.4   | 0.58     | 42.91   | 2.71     |
|                                                                                                                                                                                                                                                              |                                   | 0.63    | -0.05                    | -0.09                                    | -0.1                                                     | 0.16                      | 0.14                        | 0.46                                      | -0.06 | -0.21                         | -0.16                            | -0.18     | 0.18        | 0.6                      | 1.12                   | 1.43                       | 0.57         | 2.83       | 5.08            | 30.07              | -0.21            | -0.14        | 0.1               | 0.74        | -0.2                                         | -0.22  | 0.44   | 0.27  | 9.36   | 2.73     | 1.3     | 2.36     |
| 2.61                                                                                                                                                                                                                                                         | -0.05                             | -0.27   | -0.28                    | -0.18                                    | -0.34                                                    | 4.71                      | -0.17                       | -0.18                                     | -0.17 | 0.27                          | 0.17                             | 0.33      | 1.27        | 1.07                     | 0.82                   | 2.79                       | 7.96         | 27.07      | -0.17           | -0.1               | -0.25            | 0.79         | -0.11             | -0.16       | 0.7                                          | -0.01  | 114.68 | 2.36  | 8.51   | 1.74     |         |          |
| TA-AML1_NI-1<br>TA-AML1_NI-3<br>TA-AML1_NI-5<br>TA-AML1_NI-6<br>TA-AML3_NI-6<br>TA-AML3_NI-4<br>TA-AML3_NI-4<br>TA-AML3_NI-5<br>TA-AML2_NI-6<br>TA-AML2_NI-3<br>TA-AML2_NI-4<br>TA-AML4_NI-6<br>TA-AML4_NI-4<br>TA-AML4_NI-5<br>TA-AML4_NI-4<br>TA-AML4_NI-5 | Healthy<br>Donors                 | 14.1    | 0.66                     | 0                                        | 0                                                        | 0                         | -0.03                       | 1.76                                      | 0.04  | 0                             | -0.33                            | 0         | 0.16        | 0.74                     | 1.09                   | 1.65                       | 1.28         | 1.79       | 7.01            | 50.71              | 0.03             | 0.29         | 0                 | 0           | 0.14                                         | 0      | 1.12   | 0.3   | 22.75  | 1.99     | 14.43   | 10.88    |
|                                                                                                                                                                                                                                                              |                                   | 6.1     | 0.14                     | 0                                        | -0.04                                                    | 0                         | -0.16                       | 0.93                                      | 0     | 0.27                          | -0.05                            | -0.06     | 0.25        | 0.87                     | 1.24                   | 1.36                       | 1.01         | 1.8        | 7.25            | 30.27              | -0.01            | 0.22         | 0.02              | 0.12        | 0                                            | 0      | 0.75   | 0     | 10.48  | 1.26     | 3.39    | 3.6      |
|                                                                                                                                                                                                                                                              |                                   | 5.66    | 0.17                     | 0                                        | 0                                                        | 0                         | 0                           | 1.12                                      | 0     | 0.01                          | -0.17                            | 0         | 0.14        | 0.78                     | 1.22                   | 1.37                       | 0.94         | 1.83       | 7.32            | 39.18              | 0                | 0.08         | 0                 | 0.02        | 0                                            | 0      | 0.72   | 0.31  | 12.18  | 1.38     | 3.87    | 4.16     |
|                                                                                                                                                                                                                                                              |                                   | 7       | 0.11                     | 0.07                                     | 0.09                                                     | 0.05                      | 0.12                        | 0.21                                      | 0     | 0.22                          | -0.19                            | 0         | 0.17        | 0.66                     | 1.07                   | 1.41                       | 0.89         | 1.52       | 6.34            |                    |                  |              |                   |             |                                              |        |        |       |        |          |         |          |

CD11b Medians

|               |                       | Ungated | CD34+CD38 <sup>low</sup> | CD49b <sup>neg</sup> CD34+CD38 <sup>low</sup> | CD33 <sup>neg</sup> CD34+CD38 <sup>low</sup> | HSC-90hi33 <sup>neg</sup> | MPP-90 <sup>low</sup> 33 <sup>neg</sup> | CMP-CD34 <sup>neg</sup> CD33 <sup>mid</sup> | GMP   | 34 <sup>neg</sup> CD38 <sup>+</sup> U+Diff | 34 <sup>neg</sup> 38 <sup>neg</sup> Myelo/Undiff | Myelo/Monoblast | ProMonocyte | CD14 <sup>neg</sup> Mono | CD14 <sup>+</sup> Mono | 11b+DR <sup>neg</sup> Mono | ProMyelocyte | Myelocytes | Meta-granulocyte | Mature Granulocyte | Pro-erythroblast | Erythroblast | Late Erythroblast | Pre-B Cells | Mature B cells CD20+CD19+ | Plasma | T Cell | pDC   | mDC   | Basophil | NK Cell | Platelet |   |
|---------------|-----------------------|---------|--------------------------|-----------------------------------------------|----------------------------------------------|---------------------------|-----------------------------------------|---------------------------------------------|-------|--------------------------------------------|--------------------------------------------------|-----------------|-------------|--------------------------|------------------------|----------------------------|--------------|------------|------------------|--------------------|------------------|--------------|-------------------|-------------|---------------------------|--------|--------|-------|-------|----------|---------|----------|---|
| TA-AML1_AML26 | CBF-AML<br>(16;21)    | 4.96    | -0.28                    | -0.31                                         | -0.31                                        | -0.26                     | -0.33                                   | -0.13                                       | -0.32 | -0.05                                      | -0.02                                            | -0.11           | 11.03       | 109.4                    | 248.8                  | 112.14                     | 1.42         | 20.8       | 160.91           | 279.34             | -0.25            | -0.25        | -0.21             | -0.05       | -0.23                     | -0.33  | 0.17   | -0.06 | 2.43  | 21.54    | 69.85   | 2.81     |   |
| TA-AML3_AML35 |                       | -0.01   | -0.44                    | -0.45                                         | -0.44                                        | -0.45                     | -0.44                                   | -0.44                                       | -0.42 | -0.33                                      | -0.3                                             | -0.38           | 11.62       | 94.19                    | 111.13                 | 78.46                      | 0.85         | 21.11      | 115.83           | 162.97             | -0.36            | -0.37        | -0.49             | -0.04       | -0.3                      | -0.44  | -0.09  | -0.24 | 1.8   | 19.94    | 30.01   | 0.67     |   |
| TA-AML3_AML5  |                       | 0.79    | -0.21                    | -0.26                                         | -0.26                                        | -0.19                     | -0.29                                   | -0.05                                       | -0.38 | -0.11                                      | 0.4                                              | -0.26           | 12.77       | 109.38                   | 239.78                 | 40.17                      | 0.17         | 30.58      | 122.67           | 170.37             | 0.38             | -0.29        | -0.41             | -0.31       | -0.34                     | -0.43  | -0.02  | 0.29  | 2.19  | 29.07    | 12.98   | 0.05     |   |
| TA-AML1_AML10 | CBF-AML<br>Inv(16)    | 0.14    | -0.17                    | -0.19                                         | -0.23                                        | -0.17                     | -0.25                                   | -0.15                                       | -0.19 | -0.17                                      | -0.11                                            | -0.05           | 11.76       | 69.4                     | 50.42                  | 74.26                      | 0.48         | 23         | 121.97           | 129.2              | -0.36            | -0.08        | 0.08              | -0.37       | -0.1                      | -0.37  | -0.01  | -0.21 | 2.71  | 35.25    | 27.58   | 0.57     |   |
| TA-AML2_AML32 |                       | -0.24   | -0.32                    | -0.33                                         | -0.33                                        | -0.29                     | -0.33                                   | -0.32                                       | -0.33 | -0.38                                      | -0.29                                            | -0.31           | 11.85       | 62.39                    | 48.46                  | 54.76                      | -0.06        | 21.01      | 193.74           | 388.26             | -0.34            | -0.35        | -0.31             | -0.28       | -0.3                      | -0.42  | 0.38   | -0.29 | 2.42  | 57.76    | 27.15   | -0.3     |   |
| TA-AML3_APL5  | APL (15;17)           | 0.36    | 0.75                     | 0.37                                          | -0.14                                        | -0.17                     | -0.14                                   | 0.79                                        | 0.02  | -0.11                                      | -0.19                                            | 0.07            | 11.42       | 54.41                    | 142.95                 | 10.6                       | 0.8          | 15.41      | 246.41           | 414.21             | -0.29            | -0.3         | -0.06             | 0.5         | -0.35                     | -0.45  | 2.22   | 4.42  | 2.97  | 13.24    | 19.82   | -0.3     | X |
| TA-AML3_APL3  |                       | 0.83    | -0.22                    | -0.26                                         | -0.28                                        | -0.46                     | -0.26                                   | -0.09                                       | -0.35 | -0.18                                      | -0.18                                            | -0.12           | 13.63       | 67.86                    | 110.86                 | 16.99                      | 0.37         | 28.92      | 173.32           | 250.38             | -0.48            | -0.31        | -0.3              | -0.18       | -0.31                     | -0.41  | 0.28   | -0.17 | 2.61  | 11.64    | 11.59   | 0.1      |   |
| TA-AML2_APL4  |                       | 0.13    | 1.51                     | -0.01                                         | -0.15                                        | -0.45                     | -0.12                                   | 6.18                                        | 0.19  | -0.12                                      | -0.08                                            | 0.07            | 14.05       | 68.36                    | 183                    | 14.73                      | 0.87         | 15.89      | 398.49           | 561.03             | -0.3             | -0.24        | -0.07             | -0.08       | -0.31                     | -0.37  | 0.29   | 14.45 | 1.81  | 18.11    | 20.14   | -0.34    |   |
| TA-AML4_APL1  |                       | 0.04    | -0.05                    | -0.1                                          | -0.41                                        | -0.52                     | -0.39                                   | -0.04                                       | -0.33 | -0.25                                      | -0.33                                            | -0.12           | 7.51        | 58.06                    | 152.18                 | 10.32                      | 0.65         | 25.49      | 201              | 325.51             | -0.56            | -0.4         | -0.33             | 0.84        | -0.4                      | -0.61  | 3.43   | 0.55  | 2.57  | 12.87    | 14.86   | -0.38    |   |
| TA-AML1_AML27 | FLT3-ITD+ NK-AML      | 0       | 1.67                     | 0.83                                          | 0                                            | 0.19                      | 0                                       | 1.88                                        | -0.24 | -0.17                                      | -0.13                                            | -0.08           | 8.59        | 53.73                    | 408.84                 | 18.23                      | 0.5          | 17.59      | 217.05           | 382.86             | -0.45            | -0.24        | -0.28             | 0.4         | -0.07                     | -0.24  | 0      | -0.02 | 0.83  | 19.43    | 51.99   | 1.37     |   |
| TA-AML3_AML7  |                       | 146.05  | 0.04                     | -0.11                                         | -0.41                                        | -0.43                     | -0.4                                    | 1.26                                        | -0.4  | 0.1                                        | -0.08                                            | 0.31            | 16.66       | 160.74                   | 332.68                 | 166.09                     | 0.78         | 38.34      | 240.17           | 339.61             | -0.25            | -0.26        | -0.28             | 0.08        | -0.3                      | -0.26  | -0.1   | 1.6   | 3.07  | 40.99    | 39.77   | X        |   |
| TA-AML3_AML9  |                       | 3.06    | 0.63                     | 0.39                                          | 0.12                                         | 0.47                      | 0.68                                    | 0.7                                         | -0.27 | -0.33                                      | -0.25                                            | -0.15           | 8.72        | 118.3                    | 216.61                 | 23.09                      | 1            | 25.48      | 90.55            | 55.76              | -0.24            | -0.29        | -0.26             | -0.47       | -0.2                      | -0.47  | -0.03  | 0.38  | 3.12  | 21.78    | 4.56    | 0.68     |   |
| TA-AML2_AML20 |                       | -0.26   | 2.7                      | 0.88                                          | 0.51                                         | 0.35                      | 0.57                                    | 3.43                                        | -0.35 | 0.34                                       | -0.19                                            | -0.33           | 11.73       | 99.66                    | 147.67                 | 41.11                      | 0.48         | 30.4       | 144.2            | 277.32             | -0.39            | -0.32        | -0.28             | -0.11       | -0.12                     | -0.41  | -0.08  | -0.22 | 2.4   | 14.38    | 22.65   | -0.05    |   |
| TA-AML2_AML21 |                       | 0.73    | 1.25                     | 0.75                                          | 0.56                                         | 0.93                      | 0.52                                    | 1.27                                        | -0.13 | -0.28                                      | -0.19                                            | -0.1            | 6.35        | 108.16                   | 176.78                 | 10.17                      | 0.55         | 20.58      | 145.46           | 272.62             | -0.4             | -0.31        | -0.33             | -0.27       | -0.3                      | -0.45  | 1.84   | 0.5   | 2.53  | 14.5     | 10.58   | -0.23    |   |
| TA-AML2_AML23 |                       | -0.18   | 0.22                     | 0.13                                          | -0.13                                        | -0.03                     | -0.14                                   | 0.27                                        | -0.3  | -0.2                                       | -0.21                                            | -0.3            | 9.13        | 68.98                    | 90.93                  | 78.82                      | 0.49         | 26.44      | 153.46           | 157.93             | -0.37            | -0.35        | -0.35             | -0.02       | -0.23                     | -0.38  | 1      | -0.22 | 2.41  | 26.22    | 14.19   | X        |   |
| TA-AML2_AML30 |                       | 51.73   | 7.3                      | 1.82                                          | 0.61                                         | 0.38                      | 0.61                                    | 7.82                                        | -0.09 | -0.22                                      | -0.15                                            | -0.02           | 10.65       | 117.35                   | 181.24                 | 96.85                      | 0.78         | 26.59      | 202.85           | 298.23             | -0.1             | -0.2         | -0.35             | 0.74        | -0.28                     | -0.31  | 0.77   | 12.58 | 3.58  | 37.24    | 75.37   | -0.21    |   |
| TA-AML2_AML39 |                       | 55.52   | 8.89                     | 0.8                                           | -0.18                                        | -0.17                     | -0.18                                   | 12.05                                       | 0.68  | 0.12                                       | -0.08                                            | -0.01           | 12.49       | 123.86                   | 167.57                 | 27.29                      | 0.64         | 24.93      | 120.04           | 116.32             | -0.42            | -0.15        | -0.43             | 0.19        | -0.24                     | -0.39  | 0.72   | -0.13 | 3.55  | 39.65    | 40.31   | 0.34     |   |
| TA-AML4_AML37 |                       | 0.24    | 0.24                     | -0.01                                         | -0.13                                        | -0.07                     | -0.13                                   | 0.71                                        | -0.37 | -0.25                                      | -0.2                                             | -0.01           | 8.53        | 74.73                    | 135.58                 | 78.02                      | 0.53         | 26.5       | 329.45           | 269.41             | -0.28            | -0.39        | -0.28             | -0.09       | -0.39                     | -0.41  | -0.22  | 23.03 | 1.01  | 63.96    | 9.91    | -0.13    |   |
| TA-AML4_AML38 |                       | -0.18   | 6.77                     | 1.76                                          | -0.03                                        | -0.01                     | -0.04                                   | 7.09                                        | -0.32 | -0.39                                      | -0.36                                            | -0.26           | 8.48        | 93.94                    | 179.59                 | 56.34                      | 0.6          | 32         | 116.8            | 98.13              | -0.45            | -0.4         | -0.4              | -0.35       | -0.38                     | -0.45  | -0.3   | 0.7   | 2.19  | 81.87    | 4.09    | -0.41    |   |
| TA-AML4_AML40 | -0.21                 | -0.14   | -0.2                     | -0.22                                         | 0                                            | -0.23                     | 0.09                                    | -0.37                                       | -0.44 | -0.38                                      | -0.39                                            | 6.39            | 93.26       | 175.02                   | 65.45                  | 0.01                       | 34.79        | 120.95     | 170.53           | -0.32              | -0.28            | -0.48        | -0.43             | -0.52       | -0.47                     | -0.03  | 0.82   | 0.73  | 21.23 | 3.95     | -0.25   |          |   |
| TA-AML3_AML6  | FLT3-TKD+ NK-AML      | 0.45    | -0.09                    | -0.14                                         | -0.16                                        | -0.13                     | -0.17                                   | 0.01                                        | -0.3  | -0.3                                       | 0.04                                             | -0.22           | 11.26       | 52.8                     | 52.83                  | 67.53                      | 0.59         | 30.26      | 95.81            | 71.37              | 1.07             | -0.26        | -0.35             | -0.37       | -0.27                     | -0.37  | -0.1   | -0.16 | 0.28  | 31.58    | 17.21   | 0.68     |   |
| TA-AML2_AML31 |                       | -0.15   | 0.5                      | 0.45                                          | 0.29                                         | 0.42                      | 0.29                                    | 0.53                                        | 0.17  | -0.21                                      | -0.14                                            | -0.17           | 6.29        | 66.71                    | 134.5                  | 17.14                      | 0.72         | 15.75      | 299.74           | 501.39             | -0.46            | -0.21        | -0.35             | -0.22       | -0.32                     | -0.36  | -0.07  | 0.73  | 0.26  | 28.72    | 40.64   | 0.02     |   |
| TA-AML4_AML8  |                       | 0.8     | -0.24                    | -0.31                                         | -0.42                                        | -0.59                     | -0.35                                   | -0.11                                       | -0.35 | -0.34                                      | -0.44                                            | -0.34           | 16.05       | 90.56                    | 124.29                 | 105.41                     | 0.76         | 28.17      | 142              | 240.06             | -0.52            | -0.43        | -0.42             | 0.19        | -0.13                     | -0.56  | -0.25  | -0.27 | 2.85  | 26.14    | 8.88    | -0.01    |   |
| TA-AML1_AML13 | FLT3wt NK-AML         | 20.35   | -0.13                    | -0.19                                         | -0.24                                        | -0.08                     | -0.25                                   | 0                                           | -0.24 | -0.21                                      | -0.2                                             | 0               | 15.11       | 120                      | 193.81                 | 213.9                      | 1.34         | 25.62      | 297.47           | 427.4              | -0.21            | -0.14        | -0.13             | 1.75        | 0.51                      | -0.23  | 0      | 0.62  | 3.2   | 314.13   | 9.04    | -0.04    |   |
| TA-AML3_AML36 |                       | 0.79    | -0.4                     | -0.41                                         | -0.42                                        | -0.25                     | -0.43                                   | -0.04                                       | -0.4  | -0.3                                       | -0.24                                            | -0.17           | 11.26       | 77.77                    | 129.78                 | 63.08                      | 0.58         | 24.96      | 365.26           | 532.14             | -0.35            | -0.35        | -0.35             | -0.48       | -0.36                     | -0.44  | 0.68   | 0.14  | 0.99  | 63.1     | 9.19    | -0.32    |   |
| TA-AML2_AML30 |                       | 3.11    | -0.25                    | -0.3                                          | -0.34                                        | -0.25                     | -0.38                                   | -0.19                                       | -0.34 | -0.3                                       | -0.21                                            | -0.31           | 6.96        | 124.43                   | 307.95                 | 31.31                      | 0.95         | 23.93      | 297.64           | 567.52             | -0.34            | -0.31        | -0.3              | -0.38       | -0.29                     | -0.41  | -0.37  | -0.2  | 2.41  | 30.75    | 28.86   | 0.8      |   |
| TA-AML2_AML42 |                       | 21.61   | -0.13                    | -0.26                                         | -0.3                                         | -0.35                     | -0.29                                   | 14.77                                       | -0.26 | -0.29                                      | -0.22                                            | -0.06           | 13.69       | 146.02                   | 245.64                 | 97.17                      | 0.47         | 32.2       | 190.53           | 297.63             | -0.38            | -0.18        | -0.33             | -0.11       | -0.04                     | -0.37  | -0.1   | -0.3  | -0.26 | 90.4     | 10.47   | -0.03    |   |
| TA-AML4_AML14 |                       | 0.41    | -0.44                    | -0.45                                         | -0.45                                        | -0.41                     | -0.46                                   | -0.31                                       | -0.43 | -0.37                                      | -0.31                                            | 0.39            | 8.58        | 64.65                    | 17.48                  | 20.26                      | 0.69         | 35.87      | 113.78           | 144.52             | -0.47            | -0.39        | -0.35             | -0.43       | -0.44                     | -0.5   | 0.18   | -0.2  | 1.11  | 25.47    | 7.09    | -0.53    |   |
| TA-AML4_AML15 | 0.09                  | 0.38    | -0.08                    | -0.23                                         | -0.2                                         | -0.23                     | 3.05                                    | -0.24                                       | -0.31 | -0.19                                      | 0.18                                             | 9.44            | 152.59      | 139.81                   | 242.51                 | 0.45                       | 18.45        | 434.23     | 606.94           | -0.55              | -0.4             | -0.37        | -0.72             | -0.45       | -0.44                     | -0.13  | 1.56   | 3.37  | 28.59 | 7.31     | -0.28   |          |   |
| TA-AML2_AML22 | MLL (10;11)           | -0.28   | -0.41                    | -0.41                                         | -0.36                                        | -0.22                     | -0.38                                   | -0.41                                       | -0.38 | -0.31                                      | -0.34                                            | -0.34           | 8.92        | 85.92                    | 217.4                  | 14.94                      | 0.5          | 25.34      | 161.84           | 254.34             | -0.38            | -0.33        | -0.28             | -0.26       | -0.29                     | -0.29  | -0.22  | -0.34 | 3.04  | 14.51    | 5.58    | -0.23    |   |
| TA-AML1_AML18 | ADK-AML<br>Cmply/Mono | 0.75    | 0.31                     | 0.11                                          | 0                                            | -0.12                     | 0.08                                    | 0.52                                        | 0.08  | -0.08                                      | -0.19                                            | 0.2             | 6.62        | 88.34                    | 244.67                 | 40.22                      | 1.77         | 16.67      | 230.66           | 389.98             | -0.22            | -0.22        | -0.18             | -0.17       | -0.2                      | -0.41  | 0.6    | -0.04 | 2.62  | 15.57    | 19.55   | 0.61     |   |
| TA-AML3_AML4  |                       | 0.49    | -0.35                    | -0.36                                         | -0.37                                        | -0.35                     | -0.38                                   | -0.27                                       | -0.34 | -0.35                                      | -0.34                                            | -0.23           | 12.05       | 93.28                    | 134.84                 | 81.05                      | 0.97         | 20.88      | 138.27           | 152.23             | -0.33            | -0.33        | -0.32             | -0.48       | -0.36                     | -0.44  | 0.14   | -0.24 | 2.6   | 34.65    | 4.71    | -0.17    |   |
| TA-AML2_AML19 |                       | 3.28    | 2.74                     | 1.47                                          | 1.49                                         | 1.98                      | 1.43                                    | 3.02                                        | 0.39  | -0.2                                       | 0.82                                             | 0.22            | 9.79        | 83.28                    | 191.72                 | 114.77                     | 0.61         | 15.97      | 310.67           | 532.14             | -0.3             | -0.27        | -0.39             | -0.21       | -0.17                     | -0.38  | 0.85   | 4.38  | 3.55  | 29.57    | 16.01   | 0.25     |   |
| TA-AML2_AML29 |                       | -0.2    | -0.26                    | -0.28                                         | -0.31                                        | -0.28                     | -0.32                                   | -0.24                                       | -0.28 | -0.24                                      | 0.07                                             | -0.26           | 8.91        | 75.41                    | 130.67                 | 37.4                       | 0.04         | 20.94      | 121.48           | 229.1              | -0.1             | -0.32        | -0.24             | -0.34       | -0.26                     | -0.44  | -0.16  | -0.01 | 2.76  | 20.04    | 16.95   | 0        |   |
| TA-AML2_AML41 |                       | 7.65    | -0.29                    | -0.31                                         | -0.31                                        | -0.3                      | -0.31                                   | -0.2                                        | -0.35 | -0.26                                      | -0.08                                            | 1.18            | 18.91       | 55.75                    | 54.48                  | 65.39                      | 1.44         | 34.89      | 101.13           | 10                 |                  |              |                   |             |                           |        |        |       |       |          |         |          |   |

|                                                                                                                                                                                                                              |                       | CD15 Median         |                          |                                       |                                     |                   |                        |                                               |       |                      |                      |                     |             |                 |       |           |              |            |                     |                       |                      |              |                      |             |                                 |        |        |       |       |          |         |          |      |
|------------------------------------------------------------------------------------------------------------------------------------------------------------------------------------------------------------------------------|-----------------------|---------------------|--------------------------|---------------------------------------|-------------------------------------|-------------------|------------------------|-----------------------------------------------|-------|----------------------|----------------------|---------------------|-------------|-----------------|-------|-----------|--------------|------------|---------------------|-----------------------|----------------------|--------------|----------------------|-------------|---------------------------------|--------|--------|-------|-------|----------|---------|----------|------|
|                                                                                                                                                                                                                              |                       | Ungated             | CD34+CD38 <sup>low</sup> | CD49bRneg<br>CD34+CD38 <sup>low</sup> | CD33negCD3<br>4+CD38 <sup>low</sup> | HSC-<br>90hi33neg | MPP-<br>90low33ne<br>g | CMP-<br>CD34+CD38 <sup>low</sup><br>ovCD33mid | GMP   | 34negCD38<br>+Undiff | 34neg38neg<br>Undiff | Myelo/Mon<br>oblast | ProMonocyte | CD14neg<br>Mono | CD14+ | 11b+DRneg | ProMyelocyte | Myelocytes | Meta-<br>myelocytes | Mature<br>Granulocyte | Pro-<br>erythroblast | Erythroblast | Late<br>Erythroblast | Pre-B Cells | Mature B<br>cells<br>CD20+CD19+ | Plasma | T Cell | pDC   | mDC   | Basophil | NK Cell | Platelet |      |
| TA-AML1_AML26<br>TA-AML3_AML35<br>TA-AML3_AML5                                                                                                                                                                               | CBF-AML<br>(16/21)    | 110.23              | 1.02                     | 0.83                                  | 0.84                                | 1.21              | 0.64                   | 3.08                                          | 0.79  | 2.04                 | 2.04                 | 0.93                | 1.35        | 1.24            | 1.23  | 3.59      | 133.39       | 295.42     | 413.83              | 400.29                | -0.06                | -0.07        | -0.07                | 2.23        | -0.05                           | -0.28  | 0      | 0.48  | 0.74  | 0.93     | 0.42    | 0.64     | 0.67 |
|                                                                                                                                                                                                                              |                       | 4.07                | -0.07                    | -0.1                                  | -0.1                                | -0.02             | -0.12                  | 0.04                                          | 0.37  | 0.78                 | 0.7                  | 0.32                | 0.8         | 0.98            | 1.25  | 0.78      | 161.36       | 367.77     | 420.91              | 333.36                | -0.25                | -0.27        | -0.25                | 0.28        | -0.14                           | -0.31  | -0.06  | -0.11 | 1.33  | 0.11     | -0.03   | 0.64     |      |
|                                                                                                                                                                                                                              |                       | 1.52                | 3.87                     | 3.07                                  | 3.11                                | 3.83              | 2.71                   | 10.38                                         | 1.69  | 0.89                 | 1.19                 | 0.94                | 0.48        | 0.26            | 0.15  | 3.67      | 12.86        | 29.64      | 49.23               | 46.03                 | 0.04                 | -0.24        | -0.39                | -0.2        | -0.23                           | -0.44  | -0.07  | 0.32  | -0.04 | 0.67     | 0.05    | 0.74     |      |
| TA-AML1_AML10<br>TA-AML2_AML32                                                                                                                                                                                               | CBF-AML<br>Inv(16)    | 1.29                | 2.17                     | 2.06                                  | 1.96                                | 2.38              | 1.77                   | 2.37                                          | 1.18  | 0                    | 0.08                 | 1.06                | 0.43        | 0.5             | 0.41  | 1.02      | 49.29        | 75.96      | 74.43               | 81.25                 | -0.27                | -0.04        | -0.03                | -0.25       | 0                               | -0.36  | 0.05   | 0     | 0     | 0.36     | 0.21    | 3.71     |      |
| 0.81                                                                                                                                                                                                                         |                       | 1.17                | 1.12                     | 1.18                                  | 1.64                                | 1.08              | 1.15                   | 0.83                                          | -0.27 | -0.08                | 0.86                 | 0.93                | 1.26        | 0.71            | 1.39  | 31.1      | 152.44       | 459.15     | 654.86              | -0.13                 | -0.3                 | -0.3         | -0.11                | -0.21       | -0.4                            | 0.03   | 0.41   | 0.41  | -0.07 | 0.02     | 1.64    |          |      |
| 0.3                                                                                                                                                                                                                          |                       | 1.15                | 0.97                     | 0.97                                  | 0.94                                | 0.98              | 1.16                   | 0.59                                          | 0.08  | -0.04                | 0.19                 | 0.69                | 0.68        | -0.3            | 0.56  | 11.68     | 21.28        | 89.28      | 131.6               | 0.25                  | -0.25                | -0.03        | -0.2                 | -0.2        | -0.27                           | -0.03  | -0.07  | 0.03  | 0.66  | 0.32     | X       |          |      |
| TA-AML3_APL5<br>TA-AML3_APL3<br>TA-AML2_APL4<br>TA-AML4_APL1                                                                                                                                                                 | APL (15:17)           | 1.71                | 1.52                     | 1.25                                  | 1.06                                | 1.78              | 0.88                   | 2.58                                          | 0.26  | 0.6                  | 0.54                 | 0.61                | 0.08        | 0.26            | 0.15  | 0.85      | 22.31        | 95.26      | 236.45              | 236.21                | -0.23                | -0.28        | -0.19                | 0.45        | -0.19                           | -0.44  | -0.15  | -0.1  | -0.22 | 0.89     | -0.1    | 0.24     |      |
| -0.1                                                                                                                                                                                                                         |                       | 0.96                | 0.81                     | 0.8                                   | 0.95                                | 0.79              | 1.22                   | 0.31                                          | -0.14 | -0.15                | -0.1                 | 0.16                | 0.25        | 0.3             | 0.2   | 13.27     | 25.36        | 243.81     | 325.02              | -0.26                 | -0.28                | -0.2         | -0.04                | -0.25       | -0.43                           | -0.07  | 0.43   | -0.11 | 0.2   | -0.09    | -4.9    |          |      |
| 0.01                                                                                                                                                                                                                         |                       | 0.66                | 0.63                     | 0.64                                  | 2.22                                | 0.48              | 0.67                   | -0.13                                         | -0.17 | -0.23                | -0.04                | 0.3                 | 0.11        | 0.22            | 0.29  | 11.87     | 63.21        | 237.34     | 361.97              | -0.28                 | -0.34                | -0.43        | 0.35                 | -0.27       | -0.55                           | -0.09  | -0.24  | -0.08 | 0.4   | -0.09    | 0.76    |          |      |
| TA-AML1_AML27<br>TA-AML3_AML7<br>TA-AML3_AML9<br>TA-AML2_AML20<br>TA-AML2_AML21<br>TA-AML2_AML23<br>TA-AML2_AML30<br>TA-AML2_AML39<br>TA-AML4_AML37<br>TA-AML4_AML38<br>TA-AML4_AML40                                        | FLT3-ITD+ NK-<br>AML  | 0                   | 1.37                     | 1.2                                   | 1.22                                | 2.04              | 1.12                   | 1.39                                          | 0.58  | 0                    | 0.12                 | 0                   | 0.49        | 0.42            | 0     | 1.18      | 15.52        | 28.32      | 73.11               | 92.35                 | -0.34                | -0.24        | -0.21                | -0.16       | -0.02                           | -0.33  | 0.02   | -0.12 | 0.32  | 0.2      | 0.24    | 1.08     |      |
| 0.32                                                                                                                                                                                                                         |                       | 0.76                | 0.71                     | 1.17                                  | 1.62                                | 1.11              | 0.47                   | 0.38                                          | 0.15  | -0.19                | -0.29                | -0.11               | 0.23        | 0.26            | 0.33  | 15.52     | 19.05        | 30.59      | 31.6                | -0.26                 | -0.26                | -0.3         | -0.22                | -0.18       | -0.46                           | -0.14  | -0.39  | -0.48 | 0.1   | 0.08     | X       |          |      |
| -0.15                                                                                                                                                                                                                        |                       | 1.86                | 1.56                     | 1.39                                  | 2.11                                | 1.27              | 2.35                   | -0.14                                         | -0.26 | 0.04                 | -0.17                | -0.06               | 0.01        | 0.04            | 1.63  | 14.73     | 24.21        | 48.27      | 47.56               | 0.16                  | -0.27                | -0.27        | -0.44                | -0.15       | -0.41                           | -0.08  | -0.26  | 0.23  | -0.38 | -0.08    | -0.38   |          |      |
| 1.22                                                                                                                                                                                                                         |                       | 2.17                | 1.88                     | 1.64                                  | 2.13                                | 1.58              | 2.19                   | 0.78                                          | -0.11 | -0.2                 | 0.56                 | 1.43                | -0.16       | -0.05           | 1.61  | 35.25     | 41.7         | 139.22     | 164.79              | 0.52                  | -0.3                 | -0.27        | -0.35                | -0.26       | -0.53                           | -0.08  | 0.87   | 0.14  | 2.69  | -0.1     | 0.04    |          |      |
| 0.13                                                                                                                                                                                                                         |                       | 1.61                | 1.54                     | 1.28                                  | 1.66                                | 1.22              | 1.64                   | 0.22                                          | -0.05 | -0.02                | -0.11                | 0.16                | 0.21        | 0.02            | 1.09  | 12.05     | 17.98        | 17.79      | 17.53               | -0.15                 | -0.31                | -0.23        | 0.86                 | -0.2        | -0.41                           | -0.01  | -0.15  | 0.18  | -0.16 | 0.04     | X       |          |      |
| 0.36                                                                                                                                                                                                                         |                       | 1.07                | 0.91                     | 0.77                                  | 1.52                                | 0.69              | 1.08                   | 0.42                                          | -0.1  | -0.09                | -0.08                | 0.81                | 0.26        | -0.06           | 2.22  | 74.36     | 96.9         | 97.61      | 96.48               | -0.09                 | -0.22                | -0.01        | 2.85                 | -0.21       | -0.47                           | -0.03  | -0.21  | -0.11 | -0.08 | 0.14     | 0.18    |          |      |
| 0.13                                                                                                                                                                                                                         |                       | 0.76                | 0.58                     | 0.63                                  | 0.98                                | 0.54              | 0.76                   | 0.25                                          | 2.57  | 1.29                 | -0.18                | -0.2                | -0.15       | -0.19           | 4.25  | 23.23     | 27.97        | 48.24      | 46.43               | -0.14                 | -0.22                | -0.47        | 5.94                 | -0.23       | -0.36                           | -0.11  | -0.27  | -0.29 | -0.03 | -0.04    | -0.06   |          |      |
| 0.85                                                                                                                                                                                                                         |                       | 1.84                | 1.71                     | 1.55                                  | 1.84                                | 1.52              | 2.13                   | 0.6                                           | 0.16  | 0.51                 | 0.75                 | 0.85                | 0.5         | 0.63            | 1.12  | 12.1      | 21.55        | 35.73      | 28.12               | -0.04                 | -0.27                | -0.11        | -0.63                | -0.22       | -0.45                           | -0.12  | -0.2   | 1.26  | 0.61  | 0.38     | -0.38   |          |      |
| -0.12                                                                                                                                                                                                                        |                       | 1.33                | 0.84                     | 1.08                                  | 1.86                                | 1.03              | 1.34                   | 0.12                                          | -0.23 | -0.2                 | -0.14                | 0.44                | 0.26        | 0.26            | 4.26  | 17.94     | 25.23        | 30.66      | 28.66               | -0.4                  | -0.35                | -0.37        | 0.01                 | -0.25       | -0.47                           | -0.2   | -0.25  | 0.09  | 0.69  | 0.28     | -0.26   |          |      |
| -0.2                                                                                                                                                                                                                         |                       | 0.75                | 0.58                     | 0.39                                  | 1                                   | 0.34              | 1.29                   | 0.05                                          | -0.37 | -0.28                | -0.29                | 0.37                | 0.59        | 0.38            | 2.9   | 21.32     | 30.1         | 39.88      | 40.33               | -0.33                 | -0.29                | -0.37        | -0.39                | -0.4        | -0.45                           | -0.19  | -0.36  | 0.13  | 0.16  | -0.27    | -0.12   |          |      |
| TA-AML3_AML6<br>TA-AML2_AML31<br>TA-AML4_AML8                                                                                                                                                                                |                       | FLT3-TKD+<br>NK-AML | -0.01                    | 0.87                                  | 0.83                                | 0.81              | 1.35                   | 0.75                                          | 0.93  | 0.3                  | -0.13                | 0.11                | -0.07       | 0.06            | 0.23  | 0.04      | 0.26         | 11.68      | 17.49               | 18.8                  | 24.11                | -0.48        | -0.27                | -0.27       | -0.2                            | -0.18  | -0.48  | -0.08 | -0.17 | 0.02     | 0.21    | 0.1      | 1.37 |
| -0.06                                                                                                                                                                                                                        | 0.84                  |                     | 0.8                      | 0.6                                   | 0.81                                | 0.59              | 0.89                   | 0.16                                          | -0.16 | -0.02                | -0.07                | 0.37                | 0.52        | -0.03           | 0.24  | 12.56     | 26.96        | 218.3      | 313.02              | -0.22                 | -0.12                | -0.12        | 0.3                  | -0.22       | -0.38                           | -0.08  | -0.07  | 0.27  | 0.04  | -0.06    | 0.09    |          |      |
| 0.78                                                                                                                                                                                                                         | 1.21                  |                     | 1.04                     | 1.1                                   | 1.64                                | 0.63              | 1.1                    | 0.55                                          | 0.34  | -0.36                | -0.27                | 0.2                 | 0.26        | 0.21            | 0.94  | 29.39     | 63.97        | 171.27     | 169.27              | -0.26                 | -0.32                | -0.38        | 1.31                 | -0.07       | -0.39                           | -0.17  | -0.29  | -0.12 | 0.17  | -0.1     | 0.43    |          |      |
| TA-AML1_AML13<br>TA-AML3_AML36<br>TA-AML2_AML33<br>TA-AML2_AML42<br>TA-AML4_AML14<br>TA-AML4_AML15                                                                                                                           | FLT3wt NK-<br>AML     | 1.22                | 1.03                     | 0.99                                  | 0.92                                | 1.71              | 0.89                   | 1.31                                          | 0.54  | 0                    | -0.03                | 0.28                | 0.54        | 0.36            | 0.38  | 0.31      | 129.59       | 79.87      | 147.87              | 189.53                | -0.13                | -0.16        | -0.05                | 2.15        | 0.05                            | -0.2   | 0      | -0.2  | 0     | 140.4    | 0       | -0.04    |      |
| 0.2                                                                                                                                                                                                                          |                       | 0.22                | 0.17                     | 0.17                                  | 0.84                                | 0.13              | 1.58                   | 0.2                                           | -0.2  | -0.18                | 0.57                 | 0.4                 | 0.28        | 0.36            | 1.16  | 29.55     | 71.79        | 234.28     | 293.15              | -0.34                 | -0.3                 | -0.28        | 0.17                 | -0.3        | -0.34                           | -0.16  | -0.15  | -0.22 | 0     | -0.17    | -0.2    |          |      |
| 4.55                                                                                                                                                                                                                         |                       | 2.08                | 1.91                     | 1.78                                  | 2.17                                | 1.72              | 2.51                   | 0.63                                          | -0.31 | -0.13                | 0.88                 | 1.15                | 0.36        | 0.09            | 1.04  | 152.95    | 213.37       | 505.34     | 596.52              | -0.18                 | -0.26                | -0.29        | -0.31                | -0.28       | -0.37                           | -0.05  | -0.08  | 0.03  | 0     | -0.03    | 0.58    |          |      |
| 0.83                                                                                                                                                                                                                         |                       | 1.23                | 0.64                     | 0.51                                  | 2.41                                | 0.31              | 4.44                   | 0.12                                          | -0.23 | -0.21                | 0.06                 | 0.35                | 0.3         | 0.26            | 0.88  | 21.59     | 29.6         | 63.9       | 102.72              | -0.37                 | -0.19                | -0.27        | -0.35                | -0.22       | -0.38                           | -0.2   | -0.3   | -0.37 | -0.41 | -0.21    | -0.04   |          |      |
| -0.01                                                                                                                                                                                                                        |                       | 1.06                | 0.97                     | 0.96                                  | 2.23                                | 0.77              | 9.57                   | 1                                             | -0.43 | -0.39                | -0.3                 | -0.1                | -0.1        | -0.03           | -0.15 | 23.49     | 112.76       | 253.05     | 276.91              | -0.29                 | -0.35                | -0.31        | -0.42                | -0.36       | -0.52                           | -0.25  | -0.26  | -0.01 | -0.15 | -0.29    | -0.03   |          |      |
| 0.19                                                                                                                                                                                                                         |                       | 0.83                | 0.73                     | 0.66                                  | 1.79                                | 0.59              | 1.13                   | 0.26                                          | -0.2  | -0.26                | 0.54                 | 1.69                | 1           | 0.21            | 0.41  | 12.13     | 15.35        | 161.15     | 203.26              | -0.47                 | -0.3                 | -0.35        | -0.69                | -0.28       | -0.42                           | -0.19  | 0.63   | -0.56 | 0.23  | -0.25    | -0.08   |          |      |
| TA-AML2_AML22                                                                                                                                                                                                                | MLL (10;11)           | -0.23               | -0.23                    | -0.24                                 | -0.14                               | 0.3               | -0.17                  | -0.24                                         | -0.26 | -0.33                | -0.27                | -0.28               | 0.02        | 0.01            | -0.1  | 5.31      | 16.95        | 32.29      | 161.35              | 215.36                | -0.29                | -0.32        | -0.35                | -0.44       | -0.21                           | -0.44  | -0.16  | -0.35 | 0.42  | 0.01     | -0.19   | 0.46     |      |
| TA-AML1_AML18<br>TA-AML3_AML4<br>TA-AML2_AML19<br>TA-AML2_AML29<br>TA-AML2_AML41<br>TA-AML4_AML25                                                                                                                            | ADK-AML<br>Cmply/Mono | 0.87                | 1.01                     | 0.89                                  | 0.89                                | 0.85              | 0.96                   | 1.01                                          | 0.69  | -0.09                | -0.06                | 0.61                | 1.75        | 0.6             | 0.16  | 0.88      | 12.86        | 114.48     | 511.17              | 549.8                 | -0.02                | -0.14        | -0.13                | -0.26       | -0.01                           | -0.37  | 0.26   | -0.08 | 0.41  | 0.72     | 0       | 1.6      |      |
| 3.37                                                                                                                                                                                                                         |                       | 2.26                | 1.98                     | 1.78                                  | 2.92                                | 1.49              | 4.4                    | 0.85                                          | -0.25 | -0.2                 | 0.79                 | 0.27                | 0.46        | 0.68            | 1.55  | 184.96    | 170.11       | 195.59     | 127.95              | -0.25                 | -0.28                | -0.27        | 0.4                  | -0.24       | -0.39                           | -0.08  | -0.11  | -0.13 | -0.13 | 0        | 0       |          |      |
| 1.79                                                                                                                                                                                                                         |                       | 1.84                | 1.44                     | 1.48                                  | 2.22                                | 1.38              | 1.96                   | 0.77                                          | -0.22 | -0.08                | 0.75                 | 2.45                | 1.19        | 0.39            | 1.74  | 239.52    | 274.09       | 455.36     | 555.43              | -0.19                 | -0.21                | -0.26        | -0.41                | -0.21       | -0.36                           | -0.04  | 0.34   | 0.05  | 0.37  | -0.06    | 0.81    |          |      |
| 2.03                                                                                                                                                                                                                         |                       | 3.66                | 3.13                     | 2.63                                  | 3.75                                | 2.46              | 4.27                   | 0.67                                          | -0.18 | -0.03                | 1.64                 | 0.56                | 0.43        | 0.64            | 1.76  | 12.81     | 42.67        | 104.8      | 274.08              | -0.38                 | -0.25                | 0.56         | -0.18                | -0.14       | -0.37                           | -0.07  | 0.04   | -0.65 | 0.86  | -0.04    | 0.28    |          |      |
| 0.2                                                                                                                                                                                                                          |                       | 1.9                 | 1.55                     | 1.4                                   | 2.23                                | 1                 | 5.1                    | 0.64                                          | -0.36 | -0.29                | -0.24                | -0.1                | 0.28        | 0.24            | 1.94  | 154.04    | 92.19        | 108.69     | 125.3               | -0.32                 | -0.3                 | -0.31        | -0.22                | -0.26       | -0.4                            | -0.17  | -0.39  | -0.14 | 0.86  | -0.25    | -0.06   |          |      |
| 1.07                                                                                                                                                                                                                         |                       | 1.56                | 0.85                     | 0.8                                   | 1.38                                | 0.47              | 18.54                  | -0.01                                         | -0.32 | -0.3                 | 0.18                 | -0.26               | -0.11       | -0.11           | 0.2   | 190.34    | 48.62        | 52.07      | 99.48               | -0.37                 | -0.33                | -0.37        | 0.58                 | -0.25       | -0.5                            | -0.18  | -0.28  | -0.27 | -0.36 | -0.26    | -1.1    |          |      |
| TA-AML1_N1-1<br>TA-AML1_N1-3<br>TA-AML1_N1-5<br>TA-AML1_N1-6<br>TA-AML3_N1-6<br>TA-AML3_N1-4<br>TA-AML3_N1-5<br>TA-AML2_N1-6<br>TA-AML2_N1-3<br>TA-AML2_N1-4<br>TA-AML4_N1-6<br>TA-AML4_N1-5<br>TA-AML4_N1-4<br>TA-AML4_N1-5 |                       | Healthy<br>Donors   | 317.08                   | 2.12                                  | 1.25                                | 1.21              | 1.26                   | 1.21                                          | 3.84  | 0.07                 | 0.21                 | -0.08               | 0           | 0.05            | 0.44  | 0.2       | 0.55         | 108.58     | 147.97              | 460.95                | 463.85               | -0.05        | -0.05                | -0.11       | -0.26                           | -0.05  | -0.34  | 0     | 0     | 0.04     | 0.32    | 0.23     | 1.2  |
| 340.04                                                                                                                                                                                                                       | 2.11                  |                     | 1.56                     | 1.57                                  | 2.02                                | 1.25              | 4.52                   | 0.48                                          | 1.57  | 1.02                 | 0.03                 | 0.52                | 0.75        | 0.41            | 1.21  | 75.88     | 162.65       | 541.47     | 554.91              | -0.15                 | -0.01                | -0.1         | -0.16                | -0.05       | -0.27                           | 0      | 0      | 0.06  | 0.3   | 0.22     | 1.22    |          |      |
| 251.95                                                                                                                                                                                                                       | 1.92                  |                     | 1.21                     | 1.29                                  | 2.12                                | 0.95              | 5.1                    | 0.17                                          | 0.48  | 0.07                 | 0.1                  | 0.54                | 0.71        | 0.5             | 1.17  | 84.92     | 193.4        | 656.83     | 463.48              | -0.11                 | -0.09                | -0.14        | -0.2                 | 0           | -0.31                           | 0      | 0      | 0.28  | 0.5   | 0.01     | 1.07    |          |      |
| 274.47                                                                                                                                                                                                                       | 1.64                  |                     | 1.53                     | 1.54                                  | 2                                   | 1.32              | 2.09                   | 0.66                                          | 1.03  | 0.45                 | 0.13                 | 0.2                 | 0.51        | 0.32            | 1.89  | 59.85     | 136.3        | 476.29     | 429.63              | -0.14                 | -0.11                | -0.16        | -0.22                | -0.1        | -0.3                            | 0      | -0.04  | 0.29  | 0     |          |         |          |      |

|                                                                                                                                                                                                                              |                    | CD123 Median                                  |                          |                                               |                                     |                          |                           |                             |       |                        |                                              |                          |         |                          |                        |                            |              |            |                 |                    |                  |              |                   |             |                                       |        |        |         |        |          |         |          |       |
|------------------------------------------------------------------------------------------------------------------------------------------------------------------------------------------------------------------------------|--------------------|-----------------------------------------------|--------------------------|-----------------------------------------------|-------------------------------------|--------------------------|---------------------------|-----------------------------|-------|------------------------|----------------------------------------------|--------------------------|---------|--------------------------|------------------------|----------------------------|--------------|------------|-----------------|--------------------|------------------|--------------|-------------------|-------------|---------------------------------------|--------|--------|---------|--------|----------|---------|----------|-------|
|                                                                                                                                                                                                                              |                    | Ungated                                       | CD34+CD38 <sup>low</sup> | CD49b <sup>neg</sup> CD34+CD38 <sup>low</sup> | CD3 <sup>neg</sup> CD3 <sup>4</sup> | HSC-90h13 <sup>neg</sup> | MPP-90low3 <sup>neg</sup> | CMP-CD34+CD3 <sup>mid</sup> | GMP   | 34 <sup>neg</sup> CD38 | 34 <sup>neg</sup> CD38 <sup>neg</sup> Undiff | Myle/10 <sup>6</sup> Mon | ProMono | CD14 <sup>neg</sup> Mono | CD14 <sup>+</sup> Mono | 11b+DR <sup>neg</sup> Mono | ProMyelocyte | Myelocytes | Meta-myelocytes | Mature Granulocyte | Pro-erythroblast | Erythroblast | Late Erythroblast | Pre-B Cells | Mature B cells CD20+CD19 <sup>+</sup> | Plasma | T Cell | pDC     | mDC    | Basophil | NK Cell | Platelet |       |
| TA-AML1_AML26<br>TA-AML3_AML35<br>TA-AML3_AML5                                                                                                                                                                               | CBF-AML (16;21)    | 0                                             | 3.06                     | 3.02                                          | 2.93                                | 3.28                     | 2.7                       | 4.22                        | 2.52  | 0.59                   | -0.14                                        | 4.4                      | 5.06    | 2.05                     | 0.52                   | 4.46                       | -0.03        | 0          | -0.14           | -0.15              | -0.39            | -0.36        | -0.4              | 0.98        | 0.39                                  | 0.61   | -0.34  | 99.11   | 8.88   | 131.67   | -0.31   | 0        | 0     |
|                                                                                                                                                                                                                              |                    | 0.48                                          | 1.96                     | 1.99                                          | 1.78                                | 1.97                     | 1.75                      | 2.91                        | 1.7   | 0.81                   | -0.28                                        | 3.06                     | 4.65    | 6.73                     | 0.68                   | 1.0                        | -0.12        | -0.21      | -0.27           | -0.38              | -0.15            | -0.44        | -0.28             | -0.14       | -0.01                                 | 0.07   | -0.41  | 174.7   | 2.84   | 85.64    | -0.42   | 1.5      | 0     |
|                                                                                                                                                                                                                              |                    | 0.88                                          | 2.62                     | 2.46                                          | 2.38                                | 3.01                     | 2                         | 3.45                        | 2.91  | 0.24                   | -0.01                                        | 4.46                     | 5.79    | 2.63                     | 0.8                    | 0.45                       | 2.53         | -0.04      | -0.3            | -0.38              | 0.73             | -0.38        | -0.45             | -0.16       | -0.09                                 | 0.49   | -0.42  | 129.27  | 4.27   | 88.55    | -0.42   | -0.57    | 0     |
| TA-AML1_AML10<br>TA-AML2_AML21                                                                                                                                                                                               | CBF-AML Inv(16)    | 3.99                                          | 5.55                     | 5.47                                          | 4.38                                | 5.09                     | 4.14                      | 6.21                        | 2.98  | 4.45                   | 1.79                                         | 5.98                     | 7.16    | 2.17                     | 1.79                   | 0.97                       | 3.08         | 1          | 0               | -0.15              | 1.14             | -0.24        | -0.27             | 0.86        | 0                                     | 0.36   | -0.32  | 132.72  | 6.46   | 146.17   | -0.27   | 0.16     | 0     |
|                                                                                                                                                                                                                              |                    | 1.27                                          | 2.12                     | 2.09                                          | 1.98                                | 2.34                     | 1.91                      | 2.36                        | 1.62  | 0.9                    | -0.23                                        | 2.25                     | 0.28    | -0.04                    | -0.03                  | 5.6                        | 1.54         | 0.07       | -0.17           | -0.16              | -0.29            | -0.39        | -0.47             | -0.14       | 0.09                                  | 0.49   | -0.42  | 93.84   | 0.82   | 121.66   | -0.36   | 1.15     | 0     |
| TA-AML3_APL5<br>TA-AML3_APL3<br>TA-AML2_APL4<br>TA-AML4_APL1                                                                                                                                                                 | APL (15;17)        | 16.89                                         | 14.5                     | 13.07                                         | 5.94                                | 2.21                     | 6.35                      | 14.67                       | 13.75 | 12.13                  | 5.99                                         | 17.06                    | 33.23   | 31.51                    | 0.29                   | 35.23                      | 16.83        | 17.13      | -0.24           | -0.27              | 7.7              | -0.31        | 4.34              | 8.09        | -0.25                                 | -0.11  | -0.4   | 215.71  | 16.07  | 74.43    | -0.05   | 0        | X     |
|                                                                                                                                                                                                                              |                    | 0.27                                          | 1.26                     | 1.12                                          | 0.63                                | 0.17                     | 0.72                      | 3.27                        | 2.54  | 1.8                    | 1.76                                         | 2.46                     | 1.35    | 0.12                     | -0.03                  | 0.64                       | 0.7          | -0.25      | -0.31           | -0.31              | -0.34            | -0.41        | -0.4              | 1.51        | -0.13                                 | 0.59   | -0.4   | 71.95   | 1.4    | 65.6     | -0.31   | 1.02     | 0     |
|                                                                                                                                                                                                                              |                    | 25.93                                         | 20.68                    | 16.68                                         | 6.76                                | 4.26                     | 7.84                      | 29.9                        | 25.35 | 20.64                  | 14.8                                         | 32.74                    | 32.77   | 43.07                    | 6.8                    | 49.49                      | 18.31        | 16.07      | -0.28           | -0.27              | 0.83             | -0.17        | -0.01             | 7.05        | -0.06                                 | 0.4    | -0.35  | 229.18  | 17.45  | 80.27    | -0.34   | 17.64    | 0     |
|                                                                                                                                                                                                                              |                    | 29.28                                         | 23.84                    | 23.49                                         | 8.1                                 | 2.08                     | 9.79                      | 24.16                       | 31.3  | 21.16                  | 3.43                                         | 31.75                    | 51.08   | 55.37                    | 1.74                   | 36.2                       | 23.69        | 0.66       | -0.32           | -0.3               | 27.53            | -0.39        | -0.39             | 0.57        | 15.96                                 | -0.27  | 0.6    | -0.45   | 308.49 | 13.36    | 83.76   | -0.44    | -0.24 |
| TA-AML1_AML27<br>TA-AML3_AML7<br>TA-AML3_AML9<br>TA-AML2_AML20<br>TA-AML2_AML21<br>TA-AML2_AML23<br>TA-AML2_AML30<br>TA-AML2_AML39<br>TA-AML4_AML37<br>TA-AML4_AML38<br>TA-AML4_AML40                                        | FLT3-ITD+ NK-AML   | 39.39                                         | 44.24                    | 40.34                                         | 26.88                               | 25.33                    | 27.49                     | 45.41                       | 23.71 | 22.35                  | 21.49                                        | 39.56                    | 88.91   | 136.99                   | 1.56                   | 11.6                       | 10.3         | 18.48      | -0.13           | -0.24              | 0.45             | -0.34        | -0.34             | 7.04        | 0                                     | 1.37   | -0.32  | 265.71  | 47.58  | 76.88    | -0.29   | 0        | 0     |
|                                                                                                                                                                                                                              |                    | 6.06                                          | 18.35                    | 12.56                                         | 2.49                                | 4.08                     | 2.38                      | 39.98                       | 3.81  | 1.21                   | -0.19                                        | 12.47                    | 19.82   | 11.33                    | 2.78                   | 3.6                        | 0.32         | 0.78       | -0.05           | -0.18              | 0                | -0.43        | -0.45             | 0.54        | -0.33                                 | 0.76   | -0.41  | 138.64  | 22.01  | 62.07    | -0.39   | 0        | X     |
|                                                                                                                                                                                                                              |                    | 0.34                                          | 21.52                    | 19.65                                         | 12.97                               | 13.7                     | 12.95                     | 22.84                       | 6.35  | 2.16                   | 0.66                                         | 10.35                    | 12.41   | 2.4                      | 0.74                   | 0.07                       | 0.45         | -0.05      | -0.12           | -0.25              | 0.05             | -0.43        | -0.46             | -0.07       | 0.24                                  | 0.21   | -0.41  | 178.76  | 3.99   | 95.25    | -0.4    | -0.36    | 0     |
|                                                                                                                                                                                                                              |                    | 3.8                                           | 5.25                     | 4.86                                          | 2.94                                | 4.03                     | 2.8                       | 5.8                         | 3.65  | 2.75                   | 1                                            | 5.54                     | 6.02    | 2.52                     | 1.16                   | -0.12                      | 1.96         | 0.52       | -0.18           | -0.33              | -0.08            | -0.29        | -0.23             | 1.61        | -0.19                                 | 1.11   | -0.36  | 77.72   | 4.23   | 100.92   | -0.22   | -0.03    | 0     |
|                                                                                                                                                                                                                              |                    | 9.19                                          | 14.49                    | 13.49                                         | 11.44                               | 12.98                    | 11.19                     | 14.6                        | 8.44  | 4.03                   | 0.8                                          | 8.93                     | 15.82   | 3.1                      | 1.46                   | 17.73                      | 2.71         | 0.87       | -0.21           | -0.27              | -0.35            | -0.37        | -0.45             | 0.44        | 1.08                                  | 0.33   | -0.35  | 142.93  | 8.65   | 74.14    | -0.36   | -0.35    | 0     |
|                                                                                                                                                                                                                              |                    | 12.93                                         | 35.04                    | 34.2                                          | 22.71                               | 24.31                    | 22.38                     | 36.09                       | 8.71  | 6.02                   | 2.33                                         | 12.17                    | 13.79   | 4.44                     | 2.72                   | 0.87                       | 4.27         | 0.8        | -0.24           | -0.25              | -0.17            | -0.39        | -0.41             | 2.56        | -0.21                                 | 0.49   | -0.37  | 217.14  | 9.42   | 64.1     | -0.36   | 0        | X     |
|                                                                                                                                                                                                                              |                    | 2.18                                          | 22.05                    | 16.88                                         | 12.09                               | 6.78                     | 12.81                     | 22.45                       | 5.65  | 4.2                    | 3.9                                          | 9.95                     | 18.53   | 5.57                     | 1.2                    | 0.82                       | 0.32         | 0.99       | -0.09           | -0.28              | -0.16            | -0.27        | -0.39             | 1.11        | -0.28                                 | 0.02   | -0.37  | 155.07  | 1.81   | 52.49    | -0.38   | -0.21    | 0     |
|                                                                                                                                                                                                                              |                    | 2.45                                          | 26.81                    | 15.07                                         | 1.59                                | 2.38                     | 1.47                      | 30.48                       | 8.26  | 0.35                   | -0.14                                        | 9.27                     | 16.1    | 8.18                     | 2.79                   | 0.2                        | 0.47         | 0.11       | -0.16           | -0.28              | 0.55             | -0.24        | -0.15             | 0.82        | -0.19                                 | 0.48   | -0.37  | 187.46  | 5.51   | 85.6     | -0.13   | -0.27    | 0     |
|                                                                                                                                                                                                                              |                    | 7.4                                           | 14.35                    | 13.66                                         | 11.84                               | 13.03                    | 11.74                     | 16.65                       | 8     | 3.85                   | 4.55                                         | 9.1                      | 21.01   | 35.09                    | 2.29                   | 24.27                      | 5.86         | 1.81       | 0.98            | 0.67               | -0.23            | -0.4         | -0.4              | 0.48        | -0.17                                 | 0.06   | -0.46  | 258.85  | 17.79  | 114.43   | -0.02   | -0.26    | 0     |
|                                                                                                                                                                                                                              |                    | 1.53                                          | 44.86                    | 32.16                                         | 8.17                                | 1.09                     | 8.27                      | 45.87                       | 7.71  | 5.79                   | -0.02                                        | 18.87                    | 64.3    | 5.14                     | 0.87                   | 1.59                       | 0.98         | 0.34       | 0.4             | -0.08              | -0.4             | -0.48        | -0.49             | 6.96        | -0.04                                 | 0.49   | -0.48  | 259.82  | 13.64  | 73.06    | 45.97   | -0.41    | 0     |
|                                                                                                                                                                                                                              |                    | 1.42                                          | 13.97                    | 12.61                                         | 10.44                               | 9.85                     | 10.48                     | 18.85                       | 10.91 | 8.66                   | 0.44                                         | 19.73                    | 25.95   | 1.89                     | -0.07                  | 0.03                       | 0.91         | 0.27       | -0.2            | -0.19              | -0.08            | -0.37        | -0.43             | 4.32        | 1.55                                  | 0.11   | -0.46  | 224.93  | 17.42  | 180.31   | -0.39   | -0.45    | 0     |
|                                                                                                                                                                                                                              |                    | TA-AML3_AML6<br>TA-AML2_AML31<br>TA-AML4_AML8 | FLT3-TKD+ NK-AML         | 7.65                                          | 21.45                               | 21.36                    | 20.62                     | 15.59                       | 21.95 | 20.54                  | 9.32                                         | 10.02                    | 2.99    | 10.84                    | 11.01                  | 4.95                       | 2.6          | 0.81       | 9.33            | 0.68               | 0.56             | -0.09        | 4.59              | -0.33       | -0.46                                 | 5.1    | -0.1   | 0.62    | -0.41  | 200.99   | 15.86   | 99.6     | -0.42 |
| 18.36                                                                                                                                                                                                                        | 25.38              |                                               |                          | 25.19                                         | 21.26                               | 14.55                    | 21.68                     | 26.09                       | 10.11 | 8.99                   | 17.19                                        | 18.88                    | 31.49   | 12.56                    | 2.72                   | 34.51                      | 17.03        | 12.69      | -0.1            | -0.25              | 1.9              | 6.1          | 2.46              | 9.19        | 0.09                                  | 0.09   | -0.38  | 223.18  | 23.58  | 90.47    | -0.26   | -0.03    | 0     |
| -0.34                                                                                                                                                                                                                        | 2.4                |                                               |                          | 2.41                                          | 2.3                                 | 2.75                     | 2.02                      | 3.06                        | 3.68  | 0.48                   | -0.51                                        | 10.05                    | 3.2     | 1.33                     | 0.93                   | -0.1                       | -0.26        | -0.15      | -0.23           | -0.28              | -0.61            | -0.48        | -0.53             | 0.69        | 0.35                                  | 0.06   | -0.47  | 99.48   | 8.88   | 269.39   | -0.46   | -0.44    | 0     |
| TA-AML1_AML13<br>TA-AML3_AML36<br>TA-AML2_AML33<br>TA-AML2_AML42<br>TA-AML4_AML14<br>TA-AML4_AML15                                                                                                                           | FLT3wt NK-AML      | -0.05                                         | 3.55                     | 3.41                                          | 2.77                                | 3.61                     | 2.55                      | 5.1                         | 2.58  | 1.55                   | 0.7                                          | 2.77                     | 2.94    | 0.86                     | 0.46                   | 0                          | -0.09        | -0.12      | -0.28           | -0.21              | -0.26            | -0.36        | -0.35             | 0.85        | -0.05                                 | -0.05  | -0.35  | 81.45   | 3.59   | 89.82    | -0.36   | -0.35    | 0     |
|                                                                                                                                                                                                                              |                    | -0.34                                         | 0.91                     | 0.9                                           | 0.86                                | 1.78                     | 0.8                       | 2.18                        | 0.85  | -0.08                  | -0.37                                        | 0.72                     | 2.15    | 0.11                     | -0.05                  | 3.85                       | -0.35        | -0.18      | -0.29           | -0.28              | -0.39            | -0.42        | -0.44             | 0.93        | 0.31                                  | -0.09  | -0.43  | 82.43   | 7.75   | 83.26    | -0.44   | -0.45    | 0     |
|                                                                                                                                                                                                                              |                    | -0.01                                         | 1.76                     | 1.65                                          | 1.58                                | 2.54                     | 1.44                      | 1.98                        | 1.32  | 0.39                   | -0.39                                        | 1.58                     | 0.55    | 1.36                     | 0.68                   | 1.13                       | 0.01         | -0.04      | -0.19           | -0.23              | -0.22            | -0.38        | -0.4              | 0.75        | 0.74                                  | 0.39   | -0.36  | 150.35  | 9.21   | 98.13    | -0.34   | -0.32    | 0     |
|                                                                                                                                                                                                                              |                    | -0.27                                         | 1.19                     | 0.78                                          | 0.64                                | 0.77                     | 0.5                       | 12.67                       | 1.93  | 0.05                   | -0.24                                        | 2.15                     | 2.13    | 0.58                     | 0.2                    | -0.1                       | -0.21        | -0.16      | -0.31           | -0.36              | -0.38            | -0.35        | -0.38             | 2.88        | -0.26                                 | -0.27  | -0.38  | 83.97   | 27.27  | 56.53    | -0.39   | -0.31    | 0     |
|                                                                                                                                                                                                                              |                    | -0.35                                         | -0.19                    | -0.19                                         | -0.21                               | 0.01                     | -0.24                     | 0.19                        | -0.02 | -0.34                  | -0.38                                        | -0.19                    | -0.1    | -0.32                    | -0.21                  | -0.33                      | -0.33        | -0.46      | -0.48           | -0.39              | -0.48            | -0.48        | -0.47             | 0.1         | -0.07                                 | -0.21  | -0.47  | 86.37   | 0.16   | 72.8     | -0.5    | -0.53    | 0     |
| 0.41                                                                                                                                                                                                                         | 1.29               | 0.95                                          | 0.67                     | 0.77                                          | 0.66                                | 2.57                     | 1.1                       | 2.2                         | 2.98  | 2.79                   | 3.39                                         | 0.35                     | -0.31   | -0.21                    | 0.95                   | 2.56                       | -0.36        | -0.31      | -0.29           | -0.46              | -0.52            | -0.11        | -0.04             | -0.14       | -0.47                                 | 91.65  | -0.06  | 180.84  | -0.48  | -0.47    | 0       |          |       |
| TA-AML2_AML22                                                                                                                                                                                                                | MLL (10;11)        | 3.46                                          | 7.65                     | 7.62                                          | 4.96                                | 4.19                     | 5.12                      | 7.79                        | 4.3   | 2.43                   | 3.05                                         | 4.98                     | 2.14    | 0.73                     | 0.6                    | 0.88                       | 0.93         | 0.21       | 0.27            | -0.02              | -0.27            | -0.38        | -0.37             | 0.94        | 0.06                                  | 0.01   | -0.35  | 1141.88 | 2.55   | 171.17   | -0.32   | -0.35    | 0     |
| TA-AML1_AML18<br>TA-AML3_AML4<br>TA-AML2_AML19<br>TA-AML2_AML29<br>TA-AML2_AML41<br>TA-AML4_AML25                                                                                                                            | ADK-AML Cmp/1+Mono | 4.51                                          | 3.36                     | 3.26                                          | 1.42                                | 1.61                     | 1.41                      | 4.29                        | 3.72  | 2.24                   | -0.28                                        | 5.65                     | 6.32    | 3.51                     | 1.02                   | -0.01                      | 3.89         | 0.56       | -0.19           | -0.22              | -0.04            | -0.35        | -0.36             | 0.61        | 0                                     | 0.76   | -0.29  | 122.17  | 5.39   | 86.94    | -0.3    | -0.16    | 0     |
|                                                                                                                                                                                                                              |                    | 0.03                                          | 1.25                     | 1.15                                          | 0.99                                | 1.68                     | 0.83                      | 1.96                        | 0.93  | 0.29                   | -0.41                                        | 1.52                     | 0.86    | -0.02                    | -0.22                  | 0.98                       | 0.15         | -0.03      | -0.21           | -0.37              | -0.28            | -0.44        | -0.45             | 0           | -0.17                                 | 0.14   | -0.42  | 82.47   | 5.21   | 61.34    | -0.4    | -0.52    | 0     |
|                                                                                                                                                                                                                              |                    | 4.89                                          | 5.72                     | 5.42                                          | 4.27                                | 5.09                     | 4.13                      | 6.53                        | 3.62  | 1.45                   | 0.27                                         | 5.31                     | 7.02    | 4.99                     | 4.99                   | 5.09                       | 1.83         | 3.46       | 6               | 2.97               | 1.29             | -0.35        | -0.35             | 0.87        | 0.26                                  | 0.91   | -0.35  | 118.85  | 10.68  | 136.83   | -0.35   | -0.31    | 0     |
|                                                                                                                                                                                                                              |                    | 2.3                                           | 3.56                     | 3.4                                           | 2.73                                | 3.74                     | 2.57                      | 3.97                        | 1.35  | 0.84                   | -0.05                                        | 2.86                     | 3.21    | 0.98                     | 1.11                   | 0.81                       | 2.8          | 1.56       | 0.64            | -0.15              | -0.24            | -0.33        | -0.19             | 2.33        | 0.04                                  | 0.17   | -0.35  | 95.08   | 2.61   | 96.85    | -0.28   | -0.34    | 0     |
|                                                                                                                                                                                                                              |                    | -0.23                                         | 1.47                     | 1.38                                          | 1.16                                | 1.59                     | 0.92                      | 2.58                        | 2.53  | 0.09                   | -0.32                                        | 0.82                     | 0.57    | 0.01                     | -0.1                   | -0.35                      | -0.17        | -0.28      | -0.32           | -0.34              | -0.33            | -0.4         | -0.35             | -0.12       | 0.03                                  | -0.14  | -0.31  | 114.41  | 0.09   | 59.65    | -0.34   | -0.33    | 0     |
| -0.19                                                                                                                                                                                                                        | 0.31               | 0.26                                          | 0.17                     | 0.32                                          | 0.01                                | 0.73                     | 0.29                      | 0.1                         | -0.41 | 0.91                   | 0.31                                         | 0.17                     | -0.11   | -0.09                    | 0.98                   | 1.42                       | 0.19         | 0.22       | -0.38           | -0.48              | -0.53            | 0.68         | -0.35             | -0.15       | -0.48                                 | 115.3  | 0.84   | 68.81   | -0.46  | -0.52    | 0       |          |       |
| TA-AML1_N1-1<br>TA-AML1_N1-3<br>TA-AML1_N1-5<br>TA-AML1_N1-6<br>TA-AML3_N1-6<br>TA-AML3_N1-4<br>TA-AML3_N1-4<br>TA-AML2_N1-6<br>TA-AML2_N1-3<br>TA-AML2_N1-4<br>TA-AML2_N1-6<br>TA-AML4_N1-3<br>TA-AML4_N1-4<br>TA-AML4_N1-5 | Healthy Donors     | -0.17                                         | 1.17                     | 1.06                                          | 0.45                                | 0.94                     | 0.21                      | 2.33                        | 0.74  | 0.01                   | -0.39                                        | 5.64                     | 4.81    | 2.11                     | 1.03                   | 3.29                       | -0.21        | -0.17      | -0.18           | -0.2               | -0.25            | -0.34        | -0.35             | 0.61        | 0.45                                  | 0.2    | -0.36  | 159.31  | 6.57   | 85.56    | -0.31   | -0.31    | 0     |
|                                                                                                                                                                                                                              |                    | -0.11                                         | 1.71                     | 1.31                                          | 1.06                                | 1.02                     | 1.16                      | 2.21                        | 1.41  | 0                      | -0.32                                        | 4.51                     | 2.41    | 0.94                     | 0.5                    | 0                          | -0.12        | -0.1       | -0.13           | -0.16              | -0.27            | -0.31        | -0.32             | 0.9</       |                                       |        |        |         |        |          |         |          |       |



|                                                                                                                                                                                                                                                                                                                                                                                    |                       | <b>CD3 Median</b> |                                                                   |                                   |                                  |                |                |                  |       |                               |                  |                 |             |              |            |                |              |            |                 |                    |                  |              |                   |             |                           |        |        |       |       |          |         |          |       |       |
|------------------------------------------------------------------------------------------------------------------------------------------------------------------------------------------------------------------------------------------------------------------------------------------------------------------------------------------------------------------------------------|-----------------------|-------------------|-------------------------------------------------------------------|-----------------------------------|----------------------------------|----------------|----------------|------------------|-------|-------------------------------|------------------|-----------------|-------------|--------------|------------|----------------|--------------|------------|-----------------|--------------------|------------------|--------------|-------------------|-------------|---------------------------|--------|--------|-------|-------|----------|---------|----------|-------|-------|
|                                                                                                                                                                                                                                                                                                                                                                                    |                       | Ungated           | CD34+CD38 <sup>lo</sup> CD133 <sup>hi</sup> CD38 <sup>lo</sup> ow | CD49bRneg CD34+CD38 <sup>hi</sup> | CD33negCD34 <sup>+</sup> CD38low | HSC-90hi133neg | MPP-90low33neg | CMP-CD34+CD38mid | GMP   | 34negCD38 <sup>+</sup> Undiff | 34neg38negUndiff | Myelo/Monoblast | ProMonocyte | CD14neg Mono | CD14+ Mono | 11b+DRneg Mono | ProMyelocyte | Myelocytes | Meta-myelocytes | Mature Granulocyte | Pro-erythroblast | Erythroblast | Late Erythroblast | Pre-B Cells | Mature B cells CD20+CD19+ | Plasma | T Cell | pDC   | mDC   | Basophil | NK Cell | Platelet |       |       |
| TA-AML1_AML26<br>TA-AML1_AML35<br>TA-AML1_AML5<br>(16:21)                                                                                                                                                                                                                                                                                                                          | CBF-AML               | -0.26             | -0.36                                                             | -0.36                             | -0.37                            | -0.34          | -0.38          | -0.36            | -0.38 | -0.35                         | -0.37            | -0.32           | -0.36       | -0.33        | -0.37      | -0.19          | -0.34        | -0.33      | -0.35           | -0.35              | -0.37            | -0.39        | -0.44             | -0.26       | -0.34                     | -0.33  | 31.86  | -0.35 | -0.33 | -0.44    | -0.33   | 0.61     |       |       |
|                                                                                                                                                                                                                                                                                                                                                                                    |                       | -0.44             | -0.46                                                             | -0.46                             | -0.46                            | -0.44          | -0.47          | -0.45            | -0.47 | -0.46                         | -0.46            | -0.46           | -0.46       | -0.46        | -0.48      | -0.56          | -0.45        | -0.46      | -0.45           | -0.44              | -0.43            | -0.42        | -0.49             | -0.4        | -0.24                     | -0.43  | -0.46  | 30.31 | -0.41 | -0.22    | -0.58   | -0.42    | -0.79 |       |
|                                                                                                                                                                                                                                                                                                                                                                                    |                       | -0.4              | -0.47                                                             | -0.47                             | -0.47                            | -0.47          | -0.47          | -0.44            | -0.47 | -0.48                         | -0.45            | -0.45           | -0.46       | -0.44        | -0.47      | -0.46          | -0.46        | -0.46      | -0.43           | -0.46              | -0.45            | -0.09        | -0.47             | -0.39       | -0.47                     | -0.45  | -0.45  | 24.52 | -0.49 | -0.46    | -0.44   | -0.4     | -0.53 |       |
| TA-AML1_AML10<br>TA-AML2_AML32                                                                                                                                                                                                                                                                                                                                                     | CBF-AML<br>Inv(16)    | -0.35             | -0.37                                                             | -0.37                             | -0.39                            | -0.35          | -0.41          | -0.36            | -0.38 | -0.39                         | -0.4             | -0.35           | -0.35       | -0.36        | -0.37      | -0.35          | -0.37        | -0.36      | -0.34           | -0.36              | -0.31            | -0.43        | -0.25             | -0.5        | -0.38                     | -0.39  | 24.54  | -0.39 | -0.38 | -0.35    | -0.36   | -0.53    |       |       |
|                                                                                                                                                                                                                                                                                                                                                                                    |                       | -0.35             | -0.41                                                             | -0.41                             | -0.41                            | -0.4           | -0.41          | -0.4             | -0.41 | -0.42                         | -0.37            | -0.41           | -0.39       | -0.42        | -0.41      | -0.34          | -0.42        | -0.4       | -0.38           | -0.4               | -0.38            | -0.4         | -0.38             | -0.44       | -0.31                     | -0.4   | -0.42  | 23.76 | -0.39 | -0.38    | -0.33   | -0.35    | -0.36 |       |
| TA-AML1_APL5<br>TA-AML1_APL3<br>TA-AML2_APL4<br>TA-AML4_APL1                                                                                                                                                                                                                                                                                                                       | APL (15:17)           | -0.43             | -0.4                                                              | -0.4                              | -0.38                            | -0.33          | -0.39          | -0.41            | -0.43 | -0.45                         | -0.44            | -0.45           | -0.47       | -0.46        | -0.44      | -0.44          | -0.43        | -0.42      | -0.45           | -0.44              | -0.44            | -0.35        | -0.44             | -0.51       | -0.4                      | -0.45  | -0.59  | 22.3  | -0.26 | -0.47    | -0.43   | -0.37    | X     |       |
|                                                                                                                                                                                                                                                                                                                                                                                    |                       | -0.36             | -0.5                                                              | -0.51                             | -0.55                            | -0.62          | -0.53          | -0.46            | -0.41 | -0.45                         | -0.44            | -0.45           | -0.41       | -0.51        | -0.47      | -0.48          | -0.45        | -0.44      | -0.44           | -0.45              | -0.44            | -0.47        | -0.43             | -0.4        | -0.46                     | -0.42  | 25.51  | -0.59 | -0.43 | -0.34    | -0.39   | -0.56    |       |       |
|                                                                                                                                                                                                                                                                                                                                                                                    |                       | -0.4              | -0.4                                                              | -0.41                             | -0.4                             | -0.45          | -0.4           | -0.44            | -0.39 | -0.41                         | -0.41            | -0.41           | -0.41       | -0.41        | -0.42      | -0.4           | -0.41        | -0.39      | -0.49           | -0.41              | -0.39            | -0.57        | -0.37             | -0.28       | -0.31                     | -0.39  | -0.43  | 19.1  | -0.4  | -0.44    | -0.41   | -0.38    | -0.46 |       |
| TA-AML1_AML27<br>TA-AML3_AML7                                                                                                                                                                                                                                                                                                                                                      | FLT3-ITD+ NK-AML      | -0.46             | -0.38                                                             | -0.39                             | -0.46                            | -0.45          | -0.47          | -0.38            | -0.47 | -0.51                         | -0.49            | -0.48           | -0.48       | -0.49        | -0.6       | -0.51          | -0.44        | -0.52      | -0.48           | -0.48              | -0.36            | -0.51        | -0.51             | -0.83       | -0.49                     | -0.39  | 30.42  | -0.51 | -0.52 | -0.5     | -0.47   | -0.61    |       |       |
|                                                                                                                                                                                                                                                                                                                                                                                    |                       | -0.35             | -0.35                                                             | -0.35                             | -0.38                            | -0.4           | -0.38          | -0.35            | -0.38 | -0.4                          | -0.38            | -0.36           | -0.34       | -0.37        | -0.32      | -0.4           | -0.34        | -0.31      | -0.32           | -0.36              | -0.36            | -0.55        | -0.35             | -0.42       | -0.15                     | -0.37  | -0.17  | 27.59 | -0.41 | -0.28    | -0.35   | -0.3     | -0.7  |       |
| TA-AML1_AML19<br>TA-AML1_AML20<br>TA-AML2_AML21<br>TA-AML2_AML22<br>TA-AML2_AML23<br>TA-AML2_AML24<br>TA-AML2_AML25<br>TA-AML2_AML26<br>TA-AML2_AML27<br>TA-AML2_AML28<br>TA-AML2_AML29<br>TA-AML2_AML30<br>TA-AML4_AML31<br>TA-AML4_AML32<br>TA-AML4_AML33<br>TA-AML4_AML34<br>TA-AML4_AML35<br>TA-AML4_AML36<br>TA-AML4_AML37<br>TA-AML4_AML38<br>TA-AML4_AML39<br>TA-AML4_AML40 | FLT3-TKD+ NK-AML      | -0.38             | -0.45                                                             | -0.45                             | -0.45                            | -0.37          | -0.46          | -0.45            | -0.43 | -0.46                         | -0.45            | -0.44           | -0.43       | -0.52        | -0.45      | -0.44          | -0.43        | -0.43      | -0.44           | -0.45              | -0.45            | -0.44        | -0.46             | -0.44       | -0.48                     | 28.68  | -0.37  | -0.44 | -0.39 | -0.38    | -0.45   |          |       |       |
|                                                                                                                                                                                                                                                                                                                                                                                    |                       | -0.4              | -0.2                                                              | -0.24                             | -0.2                             | -0.01          | -0.21          | -0.23            | -0.41 | -0.41                         | -0.41            | -0.41           | -0.42       | -0.4         | -0.41      | -0.38          | -0.38        | 0.37       | -0.4            | -0.4               | -0.43            | -0.45        | -0.43             | -0.46       | -0.38                     | -0.36  | 21.33  | -0.51 | -0.39 | -0.27    | -0.37   | -0.35    |       |       |
|                                                                                                                                                                                                                                                                                                                                                                                    |                       | -0.33             | -0.41                                                             | -0.41                             | -0.43                            | -0.43          | -0.43          | -0.41            | -0.4  | -0.41                         | -0.41            | -0.41           | -0.41       | -0.38        | -0.29      | -0.35          | -0.41        | -0.42      | -0.4            | -0.39              | -0.4             | -0.44        | -0.43             | -0.42       | -0.41                     | -0.39  | -0.33  | 27.71 | -0.37 | -0.49    | -0.36   | -0.37    | -0.51 |       |
|                                                                                                                                                                                                                                                                                                                                                                                    |                       | -0.39             | -0.4                                                              | -0.41                             | -0.41                            | -0.41          | -0.4           | -0.42            | -0.4  | -0.4                          | -0.41            | -0.4            | -0.4        | -0.41        | -0.4       | -0.4           | -0.4         | -0.4       | -0.42           | -0.41              | -0.4             | -0.4         | -0.41             | -0.4        | -0.41                     | -0.42  | -0.36  | -0.38 | 27.66 | -0.35    | -0.38   | -0.47    | 0.42  | X     |
|                                                                                                                                                                                                                                                                                                                                                                                    |                       | -0.39             | -0.41                                                             | -0.42                             | -0.44                            | -0.49          | -0.44          | -0.41            | -0.49 | -0.42                         | -0.42            | -0.41           | -0.4        | -0.4         | -0.41      | -0.43          | -0.41        | -0.41      | -0.4            | -0.4               | -0.39            | -0.29        | -0.39             | -0.33       | -0.46                     | -0.43  | -0.31  | 27.33 | -0.53 | -0.42    | -0.07   | -0.39    | -0.36 |       |
|                                                                                                                                                                                                                                                                                                                                                                                    |                       | -0.38             | -0.41                                                             | -0.42                             | -0.4                             | -0.37          | -0.4           | -0.41            | -0.43 | -0.41                         | -0.41            | -0.41           | -0.4        | -0.4         | -0.4       | -0.41          | -0.39        | -0.38      | -0.38           | -0.38              | -0.49            | -0.35        | -0.45             | -0.3        | -0.4                      | -0.31  | 24.03  | -0.37 | -0.4  | -0.56    | -0.37   | -0.73    |       |       |
| TA-AML1_AML6<br>TA-AML2_AML31<br>TA-AML4_AML8                                                                                                                                                                                                                                                                                                                                      | FLT3-TKD+ NK-AML      | -0.47             | -0.49                                                             | -0.49                             | -0.52                            | -0.65          | -0.51          | -0.49            | -0.34 | -0.51                         | -0.51            | -0.52           | -0.5        | -0.48        | -0.52      | -0.5           | -0.5         | -0.51      | -0.51           | -0.5               | -0.5             | -0.51        | -0.52             | -0.4        | -0.51                     | -0.54  | 27.65  | -0.64 | -0.47 | -0.32    | -0.48   | -0.46    |       |       |
|                                                                                                                                                                                                                                                                                                                                                                                    |                       | -0.23             | -0.52                                                             | -0.53                             | -0.53                            | -0.73          | -0.52          | -0.54            | -0.54 | -0.52                         | -0.54            | -0.5            | -0.53       | -0.61        | -0.53      | -0.45          | -0.45        | -0.5       | -0.52           | -0.5               | -0.5             | -0.5         | -0.49             | -0.53       | -0.45                     | -0.58  | -0.41  | 21.91 | -0.45 | -0.51    | -0.29   | -0.43    | -0.54 |       |
|                                                                                                                                                                                                                                                                                                                                                                                    |                       | -0.44             | -0.41                                                             | -0.41                             | -0.41                            | -0.53          | -0.39          | -0.39            | -0.47 | -0.46                         | -0.44            | -0.46           | -0.46       | -0.46        | -0.45      | -0.45          | -0.46        | -0.44      | -0.42           | -0.43              | -0.48            | -0.61        | -0.45             | -0.49       | -0.44                     | -0.41  | -0.49  | 32.17 | -0.39 | -0.42    | -0.37   | -0.4     | -0.61 |       |
| TA-AML1_AML13<br>TA-AML1_AML14<br>TA-AML1_AML15<br>TA-AML1_AML16<br>TA-AML1_AML17<br>TA-AML1_AML18                                                                                                                                                                                                                                                                                 | FLT3-TKD+ NK-AML      | -0.4              | -0.4                                                              | -0.4                              | -0.42                            | -0.39          | -0.42          | -0.4             | -0.43 | -0.42                         | -0.41            | -0.41           | -0.41       | -0.41        | -0.41      | -0.41          | -0.41        | -0.41      | -0.41           | -0.41              | -0.51            | -0.34        | -0.31             | -0.41       | -0.4                      | -0.45  | 24.6   | -0.42 | -0.42 | -0.49    | -0.35   | -0.47    |       |       |
|                                                                                                                                                                                                                                                                                                                                                                                    |                       | -0.19             | -0.57                                                             | -0.57                             | -0.51                            | -0.41          | -0.57          | -0.6             | -0.48 | -0.44                         | -0.54            | -0.51           | -0.54       | -0.48        | -0.5       | -0.47          | -0.52        | -0.51      | -0.51           | -0.51              | -0.5             | -0.45        | -0.52             | -0.48       | -0.45                     | -0.67  | -0.51  | 31.21 | -0.54 | -0.47    | -0.44   | -0.46    | -0.53 |       |
|                                                                                                                                                                                                                                                                                                                                                                                    |                       | -0.23             | -0.42                                                             | -0.43                             | -0.45                            | -0.54          | -0.44          | -0.37            | -0.41 | -0.41                         | -0.34            | -0.39           | -0.4        | -0.42        | -0.38      | -0.41          | -0.39        | -0.39      | -0.39           | -0.4               | -0.38            | -0.4         | -0.41             | -0.48       | -0.36                     | -0.51  | -0.48  | -0.36 | 10.98 | -0.48    | -0.34   | -0.61    | -0.24 | -0.47 |
|                                                                                                                                                                                                                                                                                                                                                                                    |                       | -0.19             | -0.47                                                             | -0.48                             | -0.48                            | -0.46          | -0.48          | -0.47            | -0.48 | -0.44                         | -0.26            | -0.47           | -0.39       | -0.43        | -0.42      | -0.47          | -0.46        | -0.45      | -0.46           | -0.47              | -0.49            | -0.47        | -0.48             | -0.68       | -0.46                     | -0.38  | 8.73   | -0.52 | -0.32 | -0.35    | -0.27   | -0.48    |       |       |
|                                                                                                                                                                                                                                                                                                                                                                                    |                       | -0.38             | -0.44                                                             | -0.44                             | -0.49                            | -0.47          | -0.49          | -0.42            | -0.42 | -0.46                         | -0.42            | -0.42           | -0.39       | -0.43        | -0.39      | -0.37          | -0.41        | -0.42      | -0.4            | -0.4               | -0.43            | -0.42        | -0.44             | -0.4        | -0.41                     | -0.45  | 32.07  | -0.38 | -0.39 | -0.43    | -0.33   | -0.48    |       |       |
|                                                                                                                                                                                                                                                                                                                                                                                    |                       | -0.31             | -0.44                                                             | -0.47                             | -0.46                            | -0.64          | -0.42          | -0.49            | -0.45 | -0.38                         | -0.26            | -0.38           | -0.45       | -0.42        | -0.42      | -0.45          | -0.41        | -0.41      | -0.43           | -0.42              | -0.41            | -0.41        | -0.43             | -0.69       | -0.42                     | -0.38  | 7.13   | -0.43 | -0.52 | -0.6     | -0.1    | -0.4     |       |       |
| TA-AML1_AML14<br>TA-AML1_AML15<br>TA-AML1_AML16                                                                                                                                                                                                                                                                                                                                    | FLT3wt NK-AML         | -0.4              | -0.54                                                             | -0.54                             | -0.54                            | -0.55          | -0.54          | -0.54            | -0.46 | -0.48                         | -0.52            | -0.55           | -0.51       | -0.5         | -0.54      | -0.53          | -0.52        | -0.54      | -0.51           | -0.52              | -0.51            | -0.54        | -0.53             | -0.52       | -0.55                     | -0.52  | 10.26  | -0.48 | -0.53 | -0.37    | -0.46   | -0.42    |       |       |
|                                                                                                                                                                                                                                                                                                                                                                                    |                       | -0.34             | -0.52                                                             | -0.53                             | -0.54                            | -0.53          | -0.54          | -0.5             | -0.53 | -0.53                         | -0.53            | -0.52           | -0.51       | -0.52        | -0.51      | -0.54          | -0.52        | -0.42      | -0.49           | -0.52              | -0.47            | -0.54        | -0.52             | -0.44       | -0.52                     | -0.46  | 17.34  | -0.19 | -0.2  | -0.48    | -0.31   | -0.53    |       |       |
|                                                                                                                                                                                                                                                                                                                                                                                    |                       | -0.37             | -0.42                                                             | -0.42                             | -0.42                            | -0.38          | -0.43          | -0.42            | -0.45 | -0.44                         | -0.42            | -0.43           | -0.39       | -0.44        | -0.39      | -0.39          | -0.52        | -0.43      | -0.42           | -0.4               | -0.41            | -0.43        | -0.43             | -0.4        | -0.57                     | -0.43  | -0.42  | 19.99 | -0.43 | -0.31    | -0.53   | -0.21    | -0.49 |       |
| TA-AML1_AML18<br>TA-AML1_AML19<br>TA-AML1_AML20<br>TA-AML2_AML29<br>TA-AML2_AML41<br>TA-AML4_AML25                                                                                                                                                                                                                                                                                 | ADK-AML<br>Emplo/Mono | -0.34             | -0.39                                                             | -0.4                              | -0.42                            | -0.42          | -0.41          | -0.39            | -0.41 | -0.39                         | -0.37            | -0.37           | -0.32       | -0.26        | -0.32      | -0.41          | -0.36        | -0.34      | -0.37           | -0.34              | -0.34            | -0.38        | -0.39             | -0.38       | -0.37                     | -0.28  | 31.91  | -0.26 | -0.2  | -0.54    | -0.29   | -0.38    |       |       |
|                                                                                                                                                                                                                                                                                                                                                                                    |                       | -0.44             | -0.48                                                             | -0.48                             | -0.48                            | -0.48          | -0.48          | -0.47            | -0.47 | -0.49                         | -0.44            | -0.48           | -0.46       | -0.42        | -0.46      | -0.47          | -0.49        | -0.48      | -0.46           | -0.47              | -0.5             | -0.48        | -0.49             | -0.42       | -0.46                     | -0.46  | 18.3   | -0.6  | -0.29 | -0.33    | -0.41   | -0.44    |       |       |
|                                                                                                                                                                                                                                                                                                                                                                                    |                       | -0.19             | -0.17                                                             | -0.21                             | -0.19                            | -0.13          | -0.2           | -0.18            | -0.3  | -0.35                         | 0.12             | -0.32           | -0.07       | -0.29        | -0.42      | -0.33          | -0.39        | -0.32      | -0.4            | -0.4               | -0.48            | -0.42        | -0.37             | -0.43       | -0.38                     | -0.41  | 22.03  | -0.38 | -0.44 | -0.44    | -0.19   | -0.44    |       |       |
|                                                                                                                                                                                                                                                                                                                                                                                    |                       | -0.39             | -0.42                                                             | -0.43                             | -0.43                            | -0.43          | -0.43          | -0.42            | -0.43 | -0.41                         | -0.37            | -0.42           | -0.42       | -0.42        | -0.4       | -0.44          | -0.41        | -0.4       | -0.42           | -0.42              | -0.51            | -0.4         | -0.32             | -0.4        | -0.41                     | -0.4   | 16.01  | -0.45 | -0.51 | -0.5     | -0.37   | -0.34    |       |       |
|                                                                                                                                                                                                                                                                                                                                                                                    |                       | -0.26             | -0.43                                                             | -0.43                             | -0.45                            | -0.51          | -0.41          | -0.42            | -0.39 | -0.25                         | 0.01             | -0.42           | -0.42       | -0.42        | -0.41      | -0.43          | -0.39        | -0.42      | -0.41           | -0.42              | -0.37            | -0.42        | -0.48             | -0.33       | -0.39                     | -0.44  | 7.17   | -0.46 | -0.3  | -0.4     | -0.01   | -0.42    |       |       |
|                                                                                                                                                                                                                                                                                                                                                                                    |                       | -0.3              | -0.51                                                             | -0.51                             | -0.51                            | -0.51          | -0.51          | -0.5             | -0.53 | -0.52                         | -0.51            | -0.52           | -0.57       | -0.53        | -0.53      | -0.51          | -0.51        | -0.5       | -0.51           | -0.49              | -0.44            | -0.49        | -0.56             | -0.54       | -0.48                     | -0.51  | 22.3   | -0.42 | -0.49 | -0.49    | -0.42   | -0.5     |       |       |
| TA-AML1_N1-1<br>TA-AML1_N1-3<br>TA-AML1_N1-5<br>TA-AML1_N1-5<br>TA-AML1_N1-6<br>TA-AML1_N1-6<br>TA-AML1_N1-4<br>TA-AML1_N1-4<br>TA-AML1_N1-5<br>TA-AML2_N1-6<br>TA-AML2_N1-3<br>TA-AML2_N1-3<br>TA-AML2_N1-4<br>TA-AML4_N1-6<br>TA-AML4_N1-4<br>TA-AML4_N1-5                                                                                                                       | Healthy Donors        | -0.29             | -0.38                                                             | -0.37                             | -0.31                            | -0.3           | -0.31          | -0.45            | -0.4  | -0.39                         | -0.4             | -0.39           | -0.34       | -0.35        | -0.36      | -0.33          | -0.37        | -0.37      | -0.37           | -0.35              | -0.38            | -0.4         | -0.43             | -0.36       | -0.36                     | -0.37  | 37.62  | -0.39 | -0.35 | -0.36    | -0.31   | -0.37    |       |       |
|                                                                                                                                                                                                                                                                                                                                                                                    |                       | -0.3              | -0.34                                                             | -0.35                             | -0.36                            | -0.33          | -0.4           | -0.32            | -0.39 | -0.4                          | -0.36            | -0.37           | -0.36       | -0.36        | -0.36      | -0.36          | -0.35        | -0.4       | -0.37           | -0.36              | -0.35            | -0.4         | -0.37             | -0.36       | -0.4                      | -0.37  | -0.36  | 28.02 | -0.33 | -0.34    | -0.35   | -0.29    | -0.34 |       |
|                                                                                                                                                                                                                                                                                                                                                                                    |                       | -0.28             | -0.36                                                             | -0.35                             | -0.37                            | -0.35          | -0.4           | -0.45            | -0.38 | -0.35                         | -0.37            | -0.36           | -0.34       | -0.36        | -0.36      | -0.36          | -0.34        | -0.37      | -0.35           | -0.36              | -0.35            | -0.38        | -0.36             | -0.4        | -0.37                     | -0.35  | -0.36  | 24.48 | -0.4  | -0.33    | -0.34   | -0.3     | -0.35 |       |
|                                                                                                                                                                                                                                                                                                                                                                                    |                       | -0.33             | -0.42                                                             | -0.42                             | -0.43                            | -0.44          | -0.43          | -0.42            | -0.43 | -0.41                         | -0.38            | -0.37           | -0.33       | -0.36        | -0.37      | -0.3           | -0.38        | -0.37      | -0.36           | -0.35              | -0.4             | -0.39        | -0.41             | -0.38       | -0.35                     | -0.39  | 29.87  | -0.39 | -0.33 | -0.37    | -0.31   | -0.37    |       |       |
|                                                                                                                                                                                                                                                                                                                                                                                    |                       | -0.42             | -0.47                                                             | -0.45                             | -0.47                            |                |                |                  |       |                               |                  |                 |             |              |            |                |              |            |                 |                    |                  |              |                   |             |                           |        |        |       |       |          |         |          |       |       |

|               |                     | CD45 Median |              |                       |                         |                   |                    |                      |       |                      |            |                     |             |                 |               |           |              |            |                     |                       |                      |              |                      |             |                        |        |        |        |        |          |         |          |
|---------------|---------------------|-------------|--------------|-----------------------|-------------------------|-------------------|--------------------|----------------------|-------|----------------------|------------|---------------------|-------------|-----------------|---------------|-----------|--------------|------------|---------------------|-----------------------|----------------------|--------------|----------------------|-------------|------------------------|--------|--------|--------|--------|----------|---------|----------|
|               |                     | Ungated     | CD34+CD38low | CD49aR<br>CD34+CD38hi | CD33negCD3<br>4+CD38low | HSC<br>90hi133neg | MPP-<br>90low33neg | CMP-<br>CD34+CD38mid | GMP   | 34negCD38<br>+Undiff | 34neg38neg | Myelo/Mon<br>oblast | ProMonocyte | CD14neg<br>Mono | CD14+<br>Mono | 11b+DRneg | ProMyelocyte | Myelocytes | Meta-<br>myelocytes | Mature<br>Granulocyte | Pro-<br>erythroblast | Erythroblast | Late<br>Erythroblast | Pre-B Cells | Mature B<br>CD20+CD19+ | Plasma | T Cell | pDC    | mDC    | Basophil | NK Cell | Platelet |
| TA-AML1_AML26 | CBF-AML<br>t(8;21)  | 13.51       | 9.64         | 9.39                  | 9.3                     | 10.35             | 8.79               | 12.45                | 9.1   | 6.06                 | 3.31       | 10.6                | 33.54       | 47.95           | 60.21         | 51.83     | 6.48         | 9.51       | 19.4                | 26.9                  | -0.32                | -0.37        | -0.39                | 10.27       | 63.56                  | 9.04   | 106.52 | 14.46  | 123.5  | 26.57    | 123.19  | 3.47     |
| TA-AML3_AML35 |                     | 8.82        | 4.69         | 4.6                   | 4.3                     | 4.95              | 4.16               | 6.73                 | 6.08  | 4.35                 | -0.15      | 7.78                | 28.55       | 80.81           | 110.38        | 65.24     | 8.72         | 14.49      | 25.14               | 29.19                 | 5.31                 | -0.32        | -0.35                | 7.54        | 61.84                  | 10.91  | 144.06 | 10.92  | 103.1  | 31.03    | 179.87  | -0.27    |
| TA-AML3_AML5  |                     | 28.95       | 14.49        | 13.5                  | 13.63                   | 15.74             | 12.65              | 16.82                | 15.29 | 10.51                | 9.61       | 15.57               | 39.34       | 79.95           | 110.32        | 59.56     | 16.3         | 15.13      | 30.65               | 40.25                 | 8.18                 | 0.2          | 0.3                  | 46.17       | 59.62                  | 15.33  | 119.74 | 11.72  | 211.19 | 49.92    | 153     | 1.37     |
| TA-AML1_AML10 |                     | 17.26       | 11.9         | 11.74                 | 9.85                    | 11.14             | 9.41               | 13.16                | 8.98  | 7.05                 | 6.01       | 14.62               | 57.75       | 69.28           | 70.71         | 59.56     | 13.24        | 25.63      | 46.9                | 43.39                 | 43.62                | -0.03        | 0                    | 20.94       | 43.62                  | 99.44  | 20.94  | 34.2   | 79.86  | 20.2     | 146.56  | 0.92     |
| TA-AML2_AML2  | CBF-AML<br>inv(16)  | 10.29       | 8.42         | 8.35                  | 8.13                    | 9.22              | 7.91               | 8.96                 | 7.24  | 6.08                 | 5.45       | 9.88                | 72.64       | 97.45           | 95.56         | 60.77     | 10.95        | 20.76      | 35.52               | 47.16                 | 1.19                 | -0.38        | -0.41                | 21.56       | 73.08                  | 11.76  | 129.87 | 24.57  | 91.02  | 26.69    | 136.09  | 3.67     |
| TA-AML3_APL3  |                     | 10.72       | 16.86        | 14.59                 | 11.3                    | 12.72             | 10.98              | 17.01                | 10.51 | 5.01                 | 3.59       | 9.48                | 33.68       | 39.49           | 74.6          | 17.96     | 10.95        | 14.38      | 31.91               | 46.15                 | 4.87                 | -0.2         | 1.11                 | 10.97       | 45.31                  | 19.93  | 123.82 | 25.98  | 78.87  | 21.54    | 98.37   | X        |
| TA-AML3_APL3  |                     | 11.1        | 11.88        | 11.44                 | 10.46                   | 13.1              | 9.57               | 13.46                | 6.36  | 1.97                 | 2.25       | 3.16                | 32.47       | 46.22           | 69.15         | 15.44     | 2.32         | 8.96       | 26.88               | 32.53                 | 0.34                 | -0.26        | -0.31                | 3.89        | 55.01                  | 21.85  | 96.58  | 27.64  | 99.62  | 11.58    | 96.21   | 2.01     |
| TA-AML2_APL4  |                     | 12.27       | 23.25        | 15.55                 | 15.22                   | 16.23             | 15.22              | 32.76                | 14.72 | 3.98                 | 8.93       | 13.25               | 48.79       | 48.21           | 64.22         | 25.4      | 9.2          | 13.75      | 38.06               | 44.55                 | 0.11                 | -0.14        | -0.15                | 8.96        | 38.75                  | 15     | 115.31 | 32.83  | 57.4   | 28.12    | 133.5   | 5.41     |
| TA-AML4_APL1  | 15.05               | 14.51       | 14.09        | 15.13                 | 20.21                   | 14.46             | 14.51              | 11.91                | 8.82  | 2.14                 | 13.81      | 26.04               | 50.94       | 100.57          | 21.61         | 11.75     | 16.99        | 44.28      | 54.3                | 7.92                  | -0.36                | 0.06         | 15.3                 | 63.52       | 21.58                  | 176.81 | 17.9   | 99.3   | 26.11  | 142.02   | 1.18    |          |
| TA-AML1_AML27 | FLT3-ITD+ NK<br>AML | 23.47       | 36.41        | 33.92                 | 28.65                   | 30.29             | 28.3               | 36.87                | 23.39 | 19.87                | 18.47      | 21.5                | 39.42       | 61.39           | 108.36        | 21.26     | 11.03        | 17.81      | 31.02               | 62.37                 | 11.56                | -0.05        | 0                    | 12.28       | 56.5                   | 5.47   | 124.89 | 31.53  | 45.5   | 25.91    | 146.42  | 7.63     |
| TA-AML3_AML7  |                     | 70.85       | 17.8         | 15.93                 | 14.88                   | 23.15             | 13.81              | 19.45                | 8.88  | 9.03                 | 9.45       | 13.6                | 31.01       | 69.1            | 101.88        | 67.74     | 8.17         | 25.61      | 86.06               | 118.29                | 0.88                 | -0.45        | -0.47                | 26.33       | 40.19                  | 11.02  | 90.52  | 24.69  | 56.08  | 51.27    | 152.04  | X        |
| TA-AML3_AML9  |                     | 14.84       | 22.99        | 21.72                 | 15.85                   | 16.48             | 15.71              | 26.02                | 13.73 | 10.73                | 4.94       | 14.71               | 28.73       | 67.86           | 114.83        | 7.65      | 4.78         | 9.69       | 14.19               | 16.43                 | 1.61                 | -0.35        | -0.49                | 32.56       | 69.85                  | 11.48  | 134.51 | 19.99  | 107.15 | 22.67    | 157.49  | 0.33     |
| TA-AML2_AML20 |                     | 6.62        | 12.13        | 11.17                 | 9.46                    | 13.01             | 9.18               | 13.87                | 5.54  | 3.34                 | 1.14       | 7.41                | 26.6        | 44.97           | 57.25         | 17.08     | 7.24         | 11.65      | 21.38               | 35.46                 | 0.48                 | -0.27        | -0.28                | 19.96       | 59.23                  | 12.32  | 107.33 | 8.75   | 73.36  | 23.2     | 122.84  | 1.04     |
| TA-AML2_AML21 |                     | 22.09       | 22.82        | 21.39                 | 18.84                   | 22.31             | 18.36              | 22.98                | 19.58 | 12.65                | 5.02       | 13.86               | 21.48       | 55.04           | 90.67         | 18.02     | 7.5          | 10.34      | 24.32               | 39.59                 | 3.55                 | -0.31        | -0.32                | 18.83       | 83.5                   | 32.42  | 172.78 | 20.8   | 117.29 | 20.25    | 135.34  | 0.34     |
| TA-AML2_AML23 |                     | 16.97       | 26.33        | 25.78                 | 21.49                   | 24.45             | 21.07              | 26.81                | 12.46 | 8.7                  | 9.08       | 14.29               | 26.44       | 47.2            | 73.97         | 26.94     | 11.34        | 17.68      | 32.26               | 37.77                 | 2.17                 | -0.27        | -0.44                | 8           | 46.9                   | 10.71  | 133.95 | 23     | 98.76  | 17.22    | 159.2   | X        |
| TA-AML2_AML30 |                     | 56.61       | 37.01        | 31.9                  | 23.39                   | 20.01             | 23.71              | 37.64                | 14.24 | 13.22                | 14.85      | 21.93               | 41.38       | 84.94           | 126.79        | 29.77     | 7.63         | 11.03      | 28.2                | 38.94                 | 0.92                 | -0.22        | -0.16                | 13.98       | 45.51                  | 9.76   | 134.28 | 29.86  | 90.85  | 13.87    | 151.12  | 3.48     |
| TA-AML2_AML39 |                     | 57.17       | 21.77        | 15.23                 | 11.65                   | 13.62             | 11.17              | 23.09                | 11.57 | 6.69                 | 2.77       | 15.43               | 38.8        | 68.35           | 103.52        | 13.89     | 8.29         | 13.31      | 23.29               | 28.53                 | 3.87                 | -0.2         | -0.25                | 8           | 36.38                  | 8.55   | 124.18 | 26.63  | 138    | 24.06    | 109.2   | 2.04     |
| TA-AML4_AML37 | 24.44               | 29.05       | 26.82        | 23.06                 | 27.77                   | 22.7              | 35.39              | 26.49                | 16.26 | 15.96                | 23.12      | 48.45               | 88.75       | 89.31           | 50.88         | 21.61     | 36.27        | 95.04      | 87.67               | 2.36                  | -0.25                | 0.38         | 20.32                | 37.29       | 10.25                  | 76.36  | 75.21  | 51.64  | 49.89  | 123.33   | 7.01    |          |
| TA-AML4_AML38 | 9.92                | 38.12       | 26.32        | 10.14                 | 11.72                   | 10.09             | 38.88              | 8.45                 | 9.3   | 2.96                 | 14.07      | 33.77               | 77.73       | 145.36          | 27.85         | 10.03     | 20.07        | 35.6       | 30.54               | 2.29                  | -0.45                | -0.53        | 14.88                | 62.91       | 15.55                  | 93.2   | 24.99  | 144.11 | 38.39  | 50.14    | 0.28    |          |
| TA-AML4_AML40 | 19.4                | 19.21       | 17.31        | 15.74                 | 14.42                   | 15.59             | 24.04              | 16.33                | 6.08  | 3.62                 | 10.72      | 20.68               | 60.81       | 78.64           | 47.05         | 6.34      | 25.31        | 47.91      | 56.92               | 8.17                  | -0.27                | -0.49        | 14.25                | 79.05       | 13.92                  | 124.94 | 13.52  | 34.64  | 94.92  | 139.84   | 0.94    |          |
| TA-AML3_AML6  | FLT3-TKD+<br>NK-AML | 23.23       | 33.67        | 33.04                 | 31.66                   | 35                | 31.48              | 36.51                | 17.73 | 16.37                | 11.83      | 17.57               | 51.74       | 57.71           | 83.17         | 58.34     | 15.52        | 17.68      | 25.26               | 23.76                 | 18.22                | -0.24        | -0.42                | 19.1        | 63.5                   | 23.62  | 114.66 | 36.72  | 34.1   | 31.03    | 168.47  | 1.5      |
| TA-AML2_AML31 |                     | 16.59       | 21.13        | 20.91                 | 17.97                   | 20.4              | 17.96              | 21.6                 | 22.08 | 14.16                | 16.61      | 16.46               | 22.35       | 54.02           | 87.95         | 10.87     | 17.23        | 16.92      | 32.64               | 52.48                 | 9.7                  | 10.38        | 0.04                 | 15.51       | 64.89                  | 23.91  | 118.98 | 18.12  | 30.62  | 81.01    | 137.34  | 0.9      |
| TA-AML4_AML8  |                     | 67.5        | 30.65        | 30.5                  | 29.12                   | 30.75             | 27.19              | 31.62                | 24.43 | 13.58                | -0.07      | 15.7                | 59.04       | 89.36           | 108.87        | 70.64     | 9.87         | 17.31      | 50.43               | 78.09                 | 2.97                 | -0.23        | -0.26                | 16.39       | 56.08                  | 14.67  | 121.67 | 23.56  | 139.7  | 56.13    | 221.07  | 2.23     |
| TA-AML1_AML13 | FLT3wt NK<br>AML    | 11.28       | 2.94         | 2.56                  | 2.01                    | 2.99              | 1.59               | 5.57                 | 3.3   | 3.24                 | 3.21       | 4.57                | 9.46        | 14.49           | 20.38         | 16.21     | 2.22         | 2.78       | 8.86                | 15.29                 | 0.25                 | -0.24        | -0.4                 | 10.67       | 28.58                  | 0.72   | 65.22  | 7.91   | 27.77  | 29.76    | 79.3    | 1.83     |
| TA-AML3_AML36 |                     | 15.62       | -0.14        | -0.17                 | -0.18                   | -0.43             | -0.17              | 1.98                 | 0.02  | 1.42                 | 3.02       | 2.61                | 13.12       | 23.42           | 27.59         | 9.96      | 2.63         | 3.83       | 12.82               | 19.89                 | -0.44                | -0.44        | -0.49                | 8.29        | 22.98                  | 1.52   | 48.81  | 15.27  | 42.77  | 7.97     | 50.21   | -0.36    |
| TA-AML2_AML33 |                     | 29.11       | 8.39         | 7.83                  | 6.56                    | 8.62              | 6.26               | 9.32                 | 8.05  | 6.9                  | -0.14      | 9.79                | 13.15       | 55.42           | 133.32        | 28.29     | 5.76         | 7.21       | 33.29               | 57.44                 | 1.75                 | -0.22        | -0.41                | 18.12       | 111.88                 | 4.57   | 137.56 | 29.68  | 172.55 | 27.64    | 345.56  | 1.69     |
| TA-AML2_AML42 |                     | 8.94        | 2.78         | 1.43                  | 0.72                    | 2.22              | 0.55               | 31.78                | 0.89  | 1.52                 | 3.13       | 3.52                | 8.47        | 14.15           | 22.47         | 11.73     | 1.77         | 3.17       | 8.91                | 13.22                 | -0.42                | -0.34        | -0.44                | 13.41       | 15.79                  | 0.77   | 32.22  | 5.18   | 62.99  | 17.54    | 29.94   | -1.23    |
| TA-AML4_AML14 |                     | 13.91       | 0.72         | 0.7                   | 0.67                    | 1.21              | 0.59               | 1.94                 | 1.12  | 8.27                 | 7.4        | 9.78                | 15.28       | 31.08           | 25.23         | 17.49     | 2.21         | 6.04       | 9.28                | 13.53                 | -0.37                | -0.45        | -0.52                | 9.2         | 43.55                  | 11.03  | 80.84  | 7.77   | 43.5   | 12.1     | 74.36   | -0.19    |
| TA-AML4_AML15 | 5.61                | 2.28        | 1.7          | 1.12                  | 1.19                    | 1.11              | 4.42               | 2.18                 | 2.1   | 1.77                 | 4.12       | 7.37                | 22.05       | 74.86           | 18.51         | 4.23      | 10.38        | 5.48       | 65.59               | 0.14                  | -0.34                | -0.54        | 24.89                | 58.27       | 12.22                  | 93.84  | 12.02  | 127.25 | 15.67  | 119.32   | 0.43    |          |
| TA-AML2_AML22 | MLL (t(10;11))      | 8.37        | 6.38         | 6.32                  | 4.76                    | 6.41              | 4.66               | 6.55                 | 4.6   | 5.38                 | 3.48       | 7.66                | 16.76       | 29.28           | 65.75         | 7.32      | 5.56         | 8.06       | 19.72               | 30.44                 | 0                    | -0.4         | -0.38                | 19.38       | 48.2                   | 3      | 85.9   | 8.25   | 33.68  | 18.36    | 127.63  | 0.72     |
| TA-AML1_AML18 |                     | 8.69        | 3.66         | 3.61                  | 1.27                    | 0.02              | 1.82               | 4.35                 | 5.27  | 5.01                 | 2.07       | 7.84                | 8.33        | 58.38           | 108.84        | 57.66     | 7.16         | 8.99       | 35.05               | 56.66                 | 5.49                 | 0.17         | -0.23                | 16.93       | 63.34                  | 2.45   | 184.66 | 22.44  | 187.14 | 21.73    | 134.73  | 3.63     |
| TA-AML3_AML4  |                     | 11.08       | 13.75        | 12.96                 | 12.05                   | 16.05             | 11                 | 18.09                | 8.91  | 7.33                 | 1.32       | 10.25               | 20.76       | 36.81           | 57.42         | 20.74     | 5.78         | 7.58       | 13.04               | 26.97                 | 1.64                 | -0.43        | -0.49                | 8.08        | 60.38                  | 8.54   | 95.74  | 22.08  | 87.5   | 20.83    | 98.4    | 0.06     |
| TA-AML2_AML19 |                     | 18.02       | 13.93        | 13.73                 | 11.46                   | 12.19             | 11.34              | 16.69                | 10.44 | 9.34                 | 12.85      | 14.3                | 25.57       | 56.56           | 78.81         | 59.87     | 10.07        | 20.58      | 62.63               | 67.14                 | 6.53                 | -0.22        | -0.25                | 24.16       | 51.07                  | 25.24  | 125.57 | 40.92  | 93.15  | 24.72    | 124.71  | 4.28     |
| TA-AML2_AML29 | ADK-AML<br>Emp/Mono | 5.89        | 4.88         | 4.57                  | 3.27                    | 4.5               | 3.07               | 5.8                  | 3.06  | 4.27                 | 8.44       | 5                   | 23.72       | 50.11           | 49.72         | 18.57     | 5.39         | 8.13       | 16.46               | 26.45                 | 0.41                 | -0.34        | -0.27                | 2.64        | 38.68                  | 11.92  | 68.98  | 14.82  | 63.47  | 24.58    | 76.41   | 0.54     |
| TA-AML2_AML1  |                     | 23.08       | 7.04         | 6.34                  | 5.54                    | 7.26              | 5                  | 12.76                | 5.3   | 9.19                 | 20.04      | 11.85               | 23.99       | 30.87           | 31.66         | 18.68     | 2.72         | 12.79      | 20.75               | 19.33                 | -0.11                | -0.41        | -0.44                | 22.78       | 19.36                  | 6.16   | 71.52  | 9.7    | 53.46  | 11.38    | 70.32   | -0.04    |
| TA-AML4_AML25 |                     | 61.3        | 16.72        | 13.2                  | 12.93                   | 17.93             | 9.57               | 41.58                | 6.61  | 5.22                 | 0.9        | 7.88                | 36.31       | 47.27           | 57.78         | 51.93     | 5.47         | 12.73      | 63.03               | 72.35                 | 0.91                 | -0.46        | -0.5                 | 17.09       | 48.02                  | 8.08   | 113.28 | 21.32  | 48.2   | 11.71    | 130.27  | 0.03     |
| TA-AML1_NI-1  |                     | 46.41       | 16.99        | 14.01                 | 15.48                   | 18.55             | 14.55              | 20.98                | 7.34  | 8.18                 | 3.04       | 18.77               | 46.27       | 55.97           | 124.77        | 35.14     | 6.77         | 9.88       | 30.48               | 53.63                 | 2.05                 | 0            | -0.33                | 17.05       | 69.52                  | 4.57   | 114.96 | 27.23  | 127.71 | 24.34    | 155.69  | 4.06     |
| TA-AML1_NI-3  | 23.96               | 12.13       | 11.18        | 11.42                 | 12.31                   | 10.96             | 14.69              | 6.13                 | 4.12  | 2.71                 | 14.53      | 34.33               | 50.64       | 96.53           | 52.06         | 4.33      | 7.28         | 20.98      | 32.45               | 0.82                  | -0.37                | -0.11        | 17.3                 |             |                        |        |        |        |        |          |         |          |

|               |                     | CD133 Median |                                  |                                   |                                                      |                                     |                                      |                                                        |       |                                        |                                        |                            |             |                        |                  |                                 |              |            |                 |                    |                  |              |                   |             |                                                    |        |        |       |       |          |         |          |       |
|---------------|---------------------|--------------|----------------------------------|-----------------------------------|------------------------------------------------------|-------------------------------------|--------------------------------------|--------------------------------------------------------|-------|----------------------------------------|----------------------------------------|----------------------------|-------------|------------------------|------------------|---------------------------------|--------------|------------|-----------------|--------------------|------------------|--------------|-------------------|-------------|----------------------------------------------------|--------|--------|-------|-------|----------|---------|----------|-------|
|               |                     | Ungated      | CD34<sup>+</sup>CD38<sup>-</sup> | CD49R<sup>+</sup>CD38<sup>-</sup> | CD33<sup>neg</sup>CD34<sup>+</sup>CD38<sup>low</sup> | HSC-90<sup>+</sup>133<sup>neg</sup> | MPP-90<sup>low</sup>33<sup>neg</sup> | CMP-CD34<sup>+</sup>CD38<sup>-</sup>CD33<sup>mid</sup> | GMP   | 34<sup>neg</sup>CD38<sup>+</sup>Undiff | 34<sup>neg</sup>38<sup>neg</sup>Undiff | Myelo/Mon<sup>oblast</sup> | ProMonocyte | CD14<sup>neg</sup>Mono | CD14<sup>+</sup> | 11b<sup>+</sup>DR<sup>neg</sup> | ProMyelocyte | Myelocytes | Meta-myelocytes | Mature Granulocyte | Pro-erythroblast | Erythroblast | Late Erythroblast | Pre-B Cells | Mature B cells<br>CD20<sup>+</sup>CD19<sup>+</sup> | Plasma | T Cell | pDC   | mDC   | Basophil | NK Cell | Platelet |       |
| TA-AML1_AML26 | CBF-AML<br>(t6;21)  | -0.04        | 0.71                             | 0.71                              | 0.71                                                 | 0.84                                | 0.63                                 | 0.84                                                   | 0.78  | -0.22                                  | -0.32                                  | 0.17                       | 0           | -0.16                  | -0.23            | 0.54                            | -0.21        | -0.12      | 0               | 0                  | -0.18            | -0.11        | -0.32             | -0.24       | -0.23                                              | -0.39  | -0.33  | -0.19 | -0.24 | -0.33    | -0.27   | 2.28     |       |
| TA-AML3_AML35 |                     | -0.07        | 0.15                             | 0.17                              | 0.14                                                 | 0.31                                | 0.09                                 | 0.25                                                   | 0.25  | -0.25                                  | -0.4                                   | 0.23                       | -0.16       | -0.15                  | 0.12             | -0.15                           | -0.19        | -0.08      | -0.05           | 0                  | 0                | 0.55         | -0.02             | -0.34       | -0.3                                               | -0.3   | -0.2   | -0.26 | 0.21  | -0.07    | -0.27   | 0        | 1.41  |
| TA-AML3_AML5  |                     | -0.07        | 0.37                             | 0.33                              | 0.33                                                 | 0.41                                | 0.29                                 | 0.54                                                   | 0.46  | -0.33                                  | -0.33                                  | 0.11                       | -0.12       | -0.21                  | -0.19            | -0.25                           | 0.27         | -0.24      | -0.21           | 0                  | 1                | 0.55         | -0.24             | -0.17       | -0.31                                              | -0.11  | -0.29  | -0.27 | -0.07 | -0.43    | -0.14   | -0.29    |       |
| TA-AML1_AML10 | CBF-AML<br>Inv(16)  | -0.07        | 0.04                             | 0.03                              | 0                                                    | 0.04                                | 0                                    | 0.14                                                   | -0.07 | -0.33                                  | -0.37                                  | 0                          | -0.2        | -0.22                  | -0.27            | -0.24                           | -0.11        | -0.2       | -0.19           | -0.23              | 0.05             | 0            | 0.5               | -0.46       | -0.32                                              | -0.22  | -0.29  | -0.2  | -0.2  | -0.29    | -0.22   | -0.66    |       |
| TA-AML2_AML32 |                     | 0.31         | 0.5                              | 0.5                               | 0.46                                                 | 0.54                                | 0.45                                 | 0.57                                                   | 0.5   | -0.18                                  | -0.36                                  | 0.5                        | -0.17       | -0.15                  | -0.19            | 0.23                            | 0.29         | -0.1       | -0.03           | -0.03              | 0.46             | 0.25         | 0                 | -0.13       | -0.15                                              | -0.24  | -0.28  | -0.26 | -0.19 | -0.2     | -0.28   | -0.12    | 0.92  |
| TA-AML3_AML5  | APL (t15;17)        | -0.27        | -0.23                            | -0.25                             | -0.14                                                | -0.33                               | -0.12                                | -0.24                                                  | -0.32 | -0.29                                  | -0.36                                  | -0.28                      | -0.21       | -0.14                  | -0.37            | -0.25                           | -0.27        | -0.18      | 0.01            | -0.01              | -0.17            | 0.35         | -0.08             | -0.36       | -0.33                                              | 0.37   | -0.29  | 0.08  | -0.29 | -0.23    | -0.06   | X        |       |
| TA-AML3_AML3  |                     | -0.19        | 0.02                             | 0.12                              | 0.26                                                 | 0.97                                | 0.09                                 | -0.13                                                  | -0.14 | -0.2                                   | -0.31                                  | -0.18                      | -0.27       | -0.35                  | -0.33            | -0.24                           | -0.12        | -0.18      | -0.11           | -0.09              | 0.33             | -0.06        | -0.23             | -0.16       | -0.3                                               | -0.21  | -0.31  | 1     | -0.27 | -0.03    | -0.23   | -0.06    |       |
| TA-AML2_AML4  |                     | -0.28        | -0.21                            | -0.18                             | -0.15                                                | -0.03                               | -0.18                                | -0.24                                                  | -0.27 | -0.29                                  | -0.32                                  | -0.28                      | -0.16       | -0.18                  | -0.4             | -0.26                           | -0.28        | -0.19      | -0.1            | -0.08              | 0.57             | -0.01        | -0.45             | -0.32       | -0.32                                              | -0.31  | -0.28  | -0.25 | -0.35 | -0.25    | -0.23   | -0.25    |       |
| TA-AML4_AML1  |                     | -0.36        | -0.35                            | -0.35                             | -0.2                                                 | 0.03                                | -0.2                                 | -0.35                                                  | -0.34 | -0.44                                  | -0.5                                   | -0.37                      | -0.31       | -0.3                   | -0.39            | -0.34                           | -0.37        | -0.35      | -0.25           | -0.23              | -0.26            | 0.09         | -0.4              | -0.39       | -0.39                                              | -0.2   | -0.41  | -0.42 | -0.36 | -0.33    | -0.31   | -0.24    |       |
| TA-AML1_AML27 | FLT3-ITD+ NK<br>AML | -0.18        | -0.09                            | -0.1                              | -0.19                                                | -0.08                               | -0.2                                 | -0.08                                                  | -0.32 | -0.29                                  | -0.31                                  | -0.18                      | -0.1        | -0.09                  | -0.26            | -0.12                           | -0.21        | -0.21      | -0.15           | -0.21              | 0.28             | 0.24         | -0.53             | -0.18       | -0.3                                               | -0.27  | -0.24  | -0.17 | -0.13 | -0.02    | -0.06   | 0.04     |       |
| TA-AML3_AML7  |                     | -0.23        | 0.4                              | 0.49                              | 0.52                                                 | 1.74                                | 0.28                                 | 0.4                                                    | 0.19  | -0.36                                  | -0.37                                  | -0.2                       | -0.23       | -0.24                  | -0.26            | -0.25                           | -0.26        | -0.27      | -0.2            | -0.12              | 0.69             | -0.02        | -0.22             | -0.16       | -0.36                                              | -0.24  | -0.27  | -0.21 | 0.07  | -0.23    | 0.03    | X        |       |
| TA-AML3_AML9  |                     | -0.14        | 0.26                             | 0.25                              | 0.07                                                 | 0.17                                | 0.06                                 | 0.29                                                   | 0.11  | -0.24                                  | -0.36                                  | -0.08                      | -0.2        | -0.3                   | -0.22            | -0.22                           | -0.14        | -0.16      | -0.13           | -0.14              | 0.25             | 0.28         | -0.32             | -0.18       | -0.26                                              | -0.22  | -0.28  | -0.08 | -0.28 | -0.22    | -0.27   | -0.14    |       |
| TA-AML2_AML20 |                     | 0.1          | 1.21                             | 1.01                              | 0.98                                                 | 0.4                                 | 1.18                                 | 1.27                                                   | 0.62  | -0.08                                  | -0.32                                  | 0.32                       | 0.21        | -0.1                   | -0.31            | -0.21                           | -0.05        | 0.16       | -0.11           | -0.13              | 0.1              | 0.31         | -0.11             | -0.12       | 0.3                                                | -0.2   | -0.29  | -0.1  | -0.22 | -0.2     | -0.12   | -0.37    |       |
| TA-AML2_AML21 |                     | -0.2         | -0.16                            | -0.18                             | -0.2                                                 | -0.23                               | -0.2                                 | -0.16                                                  | -0.28 | -0.28                                  | -0.31                                  | -0.23                      | -0.14       | -0.14                  | -0.25            | -0.3                            | -0.19        | -0.2       | -0.17           | -0.13              | -0.05            | 0.12         | -0.19             | -0.37       | -0.19                                              | -0.18  | -0.3   | 0.33  | -0.21 | -0.32    | -0.21   | -0.54    |       |
| TA-AML2_AML23 |                     | 0.47         | 0.78                             | 0.77                              | 0.67                                                 | 0.72                                | 0.66                                 | 0.79                                                   | 0.38  | -0.21                                  | -0.28                                  | 0.54                       | -0.16       | -0.3                   | -0.27            | -0.21                           | 0.38         | -0.07      | -0.18           | -0.18              | 0.91             | 0.29         | -0.27             | 0.19        | -0.34                                              | -0.05  | -0.28  | 0.31  | -0.22 | -0.35    | -0.22   | X        |       |
| TA-AML2_AML30 |                     | -0.23        | -0.15                            | -0.17                             | -0.24                                                | -0.36                               | -0.24                                | -0.15                                                  | -0.19 | -0.28                                  | -0.31                                  | -0.19                      | -0.19       | -0.26                  | -0.27            | -0.27                           | -0.21        | -0.22      | -0.24           | -0.22              | 0.9              | 0.25         | -0.46             | -0.29       | -0.34                                              | -0.11  | -0.28  | -0.1  | -0.28 | -0.33    | 0.01    | -0.25    |       |
| TA-AML2_AML39 |                     | -0.14        | 0.5                              | 0.48                              | -0.16                                                | -0.25                               | -0.16                                | 0.56                                                   | 1.11  | -0.25                                  | -0.31                                  | 0.11                       | 0.19        | -0.11                  | -0.22            | -0.17                           | -0.14        | -0.12      | -0.14           | -0.13              | 0.18             | 0.25         | -0.37             | -0.26       | -0.36                                              | -0.31  | -0.29  | -0.1  | -0.21 | -0.12    | -0.06   | 0.12     |       |
| TA-AML4_AML37 |                     | -0.21        | -0.27                            | -0.28                             | -0.31                                                | -0.3                                | -0.31                                | -0.22                                                  | -0.18 | -0.36                                  | -0.35                                  | -0.3                       | -0.2        | -0.19                  | -0.34            | -0.37                           | -0.26        | -0.21      | -0.26           | -0.32              | 0                | 0.17         | -0.35             | -0.65       | -0.44                                              | -0.29  | -0.38  | -0.03 | -0.17 | -0.33    | -0.15   | 0.18     |       |
| TA-AML4_AML38 |                     | -0.23        | -0.03                            | -0.09                             | -0.24                                                | -0.27                               | -0.21                                | -0.02                                                  | -0.34 | -0.35                                  | -0.42                                  | -0.21                      | -0.06       | -0.34                  | -0.37            | -0.33                           | -0.26        | -0.29      | -0.28           | -0.32              | 0.35             | -0.11        | -0.42             | 0.32        | -0.37                                              | -0.38  | -0.38  | -0.34 | -0.32 | -0.26    | -0.02   | 0        |       |
| TA-AML4_AML40 | -0.37               | -0.33        | -0.35                            | -0.41                             | -0.13                                                | -0.43                               | -0.18                                | -0.35                                                  | -0.42 | -0.48                                  | -0.29                                  | -0.27                      | -0.37       | -0.47                  | -0.3             | -0.35                           | -0.32        | -0.39      | -0.36           | -0.26              | -0.13            | -0.47        | -0.42             | -0.32       | -0.37                                              | -0.38  | -0.48  | -0.21 | -0.13 | -0.3     | -0.43   |          |       |
| TA-AML3_AML6  | FLT3-TKD+<br>NK-AML | 0.14         | 0.56                             | 0.59                              | 0.54                                                 | 0.8                                 | 0.54                                 | 0.6                                                    | 0.86  | 0.56                                   | -0.07                                  | 0.59                       | -0.25       | -0.3                   | -0.33            | -0.3                            | 0.67         | -0.08      | -0.18           | -0.16              | 0.46             | 0.11         | -0.23             | 0.09        | -0.33                                              | -0.12  | -0.22  | 0.29  | 0.58  | -0.27    | -0.16   | 0.86     |       |
| TA-AML2_AML31 |                     | -0.11        | 0.15                             | 0.14                              | 0.02                                                 | 0.25                                | 0                                    | 0.19                                                   | -0.1  | -0.22                                  | -0.19                                  | -0.1                       | -0.07       | -0.23                  | -0.62            | -0.33                           | -0.16        | -0.09      | -0.19           | -0.17              | 0.42             | 0.48         | 0.16              | -0.12       | -0.29                                              | -0.3   | -0.27  | -0.14 | 0     | -0.26    | -0.1    | -0.47    |       |
| TA-AML4_AML8  |                     | -0.3         | 0.6                              | 0.64                              | 0.7                                                  | 0.6                                 | 0.89                                 | 0.34                                                   | 0.13  | -0.3                                   | -0.52                                  | -0.22                      | -0.37       | -0.3                   | -0.35            | -0.36                           | -0.28        | -0.36      | -0.3            | -0.28              | -0.11            | 0.13         | 0.65              | -0.57       | -0.51                                              | -0.33  | -0.38  | -0.24 | -0.41 | -0.2     | -0.24   | -0.18    |       |
| TA-AML1_AML13 | FLT3wt NK<br>AML    | -0.25        | 0                                | 0                                 | -0.08                                                | 0                                   | -0.1                                 | 0.24                                                   | 0     | -0.15                                  | -0.27                                  | -0.08                      | -0.29       | -0.39                  | -0.32            | -0.33                           | -0.2         | -0.2       | -0.21           | -0.12              | -0.18            | -0.16        | -0.28             | -0.14       | -0.29                                              | -0.39  | -0.32  | -0.15 | -0.42 | -0.33    | -0.35   | -0.36    |       |
| TA-AML3_AML36 |                     | -0.35        | -0.27                            | -0.28                             | -0.3                                                 | -0.18                               | -0.3                                 | 0                                                      | -0.28 | -0.4                                   | -0.43                                  | -0.24                      | -0.28       | -0.27                  | -0.49            | -0.31                           | -0.3         | -0.28      | -0.34           | -0.33              | -0.3             | -0.23        | -0.36             | -0.5        | -0.36                                              | -0.38  | -0.16  | -0.49 | -0.32 | -0.38    | -0.31   |          |       |
| TA-AML2_AML33 |                     | 0.09         | 0.11                             | 0.04                              | -0.03                                                | 0.32                                | -0.05                                | 0.22                                                   | 0.36  | -0.27                                  | -0.4                                   | 0.84                       | 0.21        | -0.27                  | -0.27            | -0.43                           | -0.1         | -0.19      | -0.11           | -0.04              | 0.25             | 0.12         | -0.28             | -0.3        | -0.19                                              | -0.15  | -0.28  | -0.18 | -0.26 | -0.33    | -0.12   | -0.11    |       |
| TA-AML2_AML42 |                     | -0.36        | -0.14                            | -0.25                             | -0.26                                                | 0.35                                | -0.32                                | 0.11                                                   | -0.21 | -0.37                                  | -0.4                                   | -0.29                      | -0.34       | -0.37                  | -0.36            | -0.36                           | -0.35        | -0.37      | -0.34           | -0.33              | -0.28            | -0.29        | -0.27             | -0.27       | -0.36                                              | -0.35  | -0.35  | -0.36 | 0.55  | -0.38    | -0.34   |          |       |
| TA-AML4_AML14 |                     | -0.43        | -0.41                            | -0.42                             | -0.42                                                | -0.34                               | -0.44                                | -0.3                                                   | -0.41 | -0.49                                  | -0.49                                  | -0.47                      | -0.44       | -0.41                  | -0.46            | -0.51                           | -0.42        | -0.41      | -0.39           | -0.33              | -0.42            | -0.42        | -0.32             | -0.42       | -0.46                                              | -0.42  | -0.48  | -0.47 | -0.49 | -0.4     | -0.52   | -0.42    | -0.51 |
| TA-AML4_AML15 | -0.38               | -0.3         | -0.31                            | -0.3                              | -0.09                                                | -0.31                               | -0.31                                | -0.35                                                  | -0.45 | -0.48                                  | -0.31                                  | -0.19                      | -0.36       | -0.28                  | -0.43            | -0.22                           | -0.2         | -0.43      | -0.37           | -0.23              | -0.23            | -0.29        | -0.37             | -0.62       | -0.39                                              | -0.46  | -0.43  | -0.52 | -0.38 | -0.43    | -0.41   | -0.42    |       |
| TA-AML2_AML22 | ML (t10;11)         | 0.03         | 0.75                             | 0.75                              | 0.35                                                 | 0.33                                | 0.36                                 | 0.79                                                   | -0.06 | -0.21                                  | -0.15                                  | 0.2                        | -0.11       | -0.21                  | -0.32            | -0.21                           | -0.1         | -0.21      | -0.22           | -0.24              | 0.09             | -0.02        | -0.26             | -0.18       | -0.24                                              | -0.22  | -0.26  | 3.75  | -0.52 | -0.52    | -0.16   | 0.17     |       |
| TA-AML1_AML18 |                     | -0.05        | -0.07                            | -0.08                             | -0.11                                                | 0                                   | -0.21                                | -0.06                                                  | -0.13 | -0.24                                  | -0.37                                  | -0.02                      | 0           | -0.32                  | -0.27            | -0.35                           | -0.09        | -0.16      | -0.24           | -0.23              | 0                | 0            | -0.29             | -0.24       | -0.25                                              | -0.22  | -0.28  | 0     | -0.26 | -0.64    | -0.11   | -0.07    |       |
| TA-AML3_AML4  |                     | -0.17        | 0.66                             | 0.59                              | 0.5                                                  | 1.01                                | 0.35                                 | 1.12                                                   | -0.05 | -0.34                                  | -0.46                                  | -0.16                      | -0.27       | -0.37                  | -0.28            | -0.39                           | -0.32        | -0.33      | -0.33           | -0.29              | -0.12            | 0.22         | -0.22             | -0.22       | -0.31                                              | -0.29  | -0.32  | -0.34 | -0.32 | -0.23    | -0.27   | -0.23    |       |
| TA-AML2_AML19 |                     | 0.65         | 0.96                             | 0.92                              | 0.7                                                  | 0.88                                | 0.68                                 | 1.13                                                   | 0.55  | -0.25                                  | -0.21                                  | 0.79                       | 1.65        | 0.07                   | -0.38            | 0.09                            | 0.08         | 0.16       | -0.15           | -0.09              | 0.09             | 0.22         | -0.25             | 0           | -0.24                                              | -0.1   | -0.29  | -0.04 | -0.14 | -0.26    | -0.19   | 0.16     |       |
| TA-AML2_AML29 |                     | 0.05         | 0.25                             | 0.19                              | -0.05                                                | 0.18                                | -0.07                                | 0.39                                                   | -0.13 | -0.25                                  | -0.3                                   | 0.22                       | -0.2        | -0.29                  | -0.19            | -0.24                           | 0.59         | -0.18      | -0.14           | -0.23              | 0.86             | 0.24         | -0.22             | -0.36       | -0.33                                              | -0.23  | -0.27  | -0.21 | -0.25 | -0.41    | -0.18   | -0.23    |       |
| TA-AML2_AML41 |                     | -0.32        | 0.19                             | 0.09                              | -0.04                                                | 0.46                                | -0.1                                 | 0.79                                                   | -0.11 | -0.37                                  | -0.39                                  | -0.38                      | -0.37       | -0.35                  | -0.35            | -0.39                           | -0.34        | -0.35      | -0.34           | -0.34              | -0.2             | -0.02        | -0.24             | -0.29       | -0.33                                              | -0.34  | -0.32  | -0.24 | -0.27 | -0.46    | -0.33   | -0.27    |       |
| TA-AML4_AML25 | -0.4                | -0.29        | -0.26                            | -0.27                             | -0.14                                                | -0.34                               | -0.31                                | -0.44                                                  | -0.49 | -0.49                                  | -0.4                                   | -0.44                      | -0.52       | -0.47                  | -0.47            | -0.41                           | -0.39        | -0.41      | -0.39           | -0.25              | -0.2             | -0.42        | -0.44             | -0.44       | -0.43                                              | -0.39  | -0.31  | -0.49 | -0.48 | -0.34    | -0.43   |          |       |
| TA-AML1_NI-1  | Healthy Donors      | -0.12        | 0.88                             | 1.03                              | 1.04                                                 | 0.87                                | 1.21                                 | 0.59                                                   | 0.17  | -0.22                                  | -0.42                                  | -0.05                      | -0.31       | -0.28                  | -0.28            | -0.28                           | -0.21        | -0.21      | -0.1            | -0.03              | 0.03             | -0.02        | -0.3              | -0.33       | -0.27                                              | -0.22  | -0.31  | -0.27 | -0.23 | -0.28    | -0.18   | 0.03     |       |
| TA-AML1_NI-3  |                     | -0.12        | 0.46                             | 0.45                              | 0.5                                                  | 0.61                                | 0.42                                 | 0.43                                                   | 0     | -0.24                                  | -0.36                                  | -0.09                      | -0.24       | -0.26                  | -0.29            | -0.28                           | -0.2         | -0.16      | -0.07           | -0.02              | 0                | -0.1         | -0.28             | -0.34       | -0.29                                              | -0.32  | -0.26  | -0.27 | -0.33 | -0.2     | -0.26   |          |       |
| TA-AML1_NI-5  |                     | -0.11        | 0.45                             | 0.48                              | 0.34                                                 | 0.46                                | 0.17                                 | 0.86                                                   | 0     | -0.18                                  | -0.36                                  | -0.1                       | -0.22       | -0.22                  | -0.28            | -0.25                           | -0.19        | -0.16      | -0.08           | -0.02              | 0.23             | 0            | -0.29             | -0.3        | -0.29                                              | -0.31  | -0.31  | -0.27 | -0.27 | -0.35    | -0.21   | -0.22    |       |
| TA-AML1_NI-6  |                     | -0.14        |                                  |                                   |                                                      |                                     |                                      |                                                        |       |                                        |                                        |                            |             |                        |                  |                                 |              |            |                 |                    |                  |              |                   |             |                                                    |        |        |       |       |          |         |          |       |

HLA-DR Median

|               |                | Ungated | CD34+CD38 <sup>-</sup><br>CD14+CD38 <sup>-</sup> | CD45RA <sup>neg</sup><br>CD34 <sup>+</sup> CD38 <sup>-</sup> | CD3 <sup>neg</sup> CD3 <sup>+</sup><br>4+CD38 <sup>low</sup> | HSC-<br>90h133neg | MPP-<br>90h203neg | CMP-<br>CD34 <sup>+</sup> CD33mid | GMP     | 34negCD38 <sup>+</sup><br>+Undiff | 34neg38neg<br>Undiff | Myelo/Mon<br>oblast | ProMonocyte | CD14neg<br>Mono | CD14 <sup>+</sup><br>Mono | 11b+DRneg | ProMyelocyte | Myelocytes | Meta-<br>myelocytes | Mature<br>Granulocyte | Pro-<br>erythroblast | Erythroblast | Late<br>Erythroblast | Pre-B Cells | Mature B<br>cells<br>CD20+CD19 <sup>+</sup> | Plasma | T Cell | pDC     | mDC     | Basophil | NK Cell | Platelet |     |
|---------------|----------------|---------|--------------------------------------------------|--------------------------------------------------------------|--------------------------------------------------------------|-------------------|-------------------|-----------------------------------|---------|-----------------------------------|----------------------|---------------------|-------------|-----------------|---------------------------|-----------|--------------|------------|---------------------|-----------------------|----------------------|--------------|----------------------|-------------|---------------------------------------------|--------|--------|---------|---------|----------|---------|----------|-----|
| TA-AML1_AML26 | CFP-AML        | 1.75    | 943                                              | 1047.64                                                      | 1017.66                                                      | 990.12            | 1027.19           | 884.39                            | 1325.01 | 159.63                            | 5.89                 | 1057.64             | 297.76      | 258.16          | 249.58                    | 3.89      | 2.59         | 1.09       | 0.52                | 0.26                  | 0.35                 | -0.03        | -0.21                | 309.9       | 647.03                                      | 17.48  | 0      | 83.63   | 199.39  | 1.99     | -0.15   | 30.53    |     |
| TA-AML3_AML35 | (6;21)         | 92.8    | 1661.66                                          | 1682.1                                                       | 1609.39                                                      | 1702.81           | 1587.44           | 1945.54                           | 1586.86 | 450.17                            | 15.35                | 1814.33             | 62.11       | 36.73           | 151.69                    | 3.83      | 4.43         | 1.02       | 0.67                | 0.36                  | 21.58                | 0.29         | -0.19                | 19.96       | 286.72                                      | 12.08  | 0.68   | 142.49  | 197.17  | 4.64     | -0.18   | 1467.48  |     |
| TA-AML3_AML5  |                | 229.92  | 278.77                                           | 283.76                                                       | 283.03                                                       | 252.54            | 299.97            | 258.76                            | 603.6   | 8.58                              | 1.05                 | 648.32              | 427.49      | 357.83          | 0.87                      | 185.12    | 0.24         | 0.12       | 0.2                 | 0.05                  | 448.27               | -0.25        | -0.1                 | 129.98      | 299.89                                      | 10.14  | -0.12  | 92.1    | 169.64  | 5.27     | 0.06    | 1.73     |     |
| TA-AML3_AML10 | CFP-AML        | 24.62   | 17.39                                            | 17.33                                                        | 14.18                                                        | 14.66             | 13.98             | 19.55                             | 16.03   | 13.3                              | 0.5                  | 37.29               | 269.77      | 191.55          | 102.47                    | 2.53      | 14.06        | 2.53       | 2.12                | 0.26                  | 5.2                  | 0            | 0.93                 | 19.43       | 184.54                                      | 8.23   | 0      | 224.29  | 479.21  | 0.89     | -0.02   | 0.11     |     |
| TA-AML2_AML32 | Inv(16)        | 479.06  | 500.04                                           | 504.77                                                       | 457.78                                                       | 419.6             | 465.06            | 615.12                            | 625.44  | 19.83                             | 2.45                 | 740.35              | 193.56      | 161.77          | 185.88                    | 1.08      | 602.57       | 38.66      | 1.38                | 0.8                   | 3.52                 | -0.17        | -0.27                | 81.97       | 478.18                                      | 6.85   | -0.09  | 350.1   | 409.21  | 1.1      | -0.2    | 327.32   |     |
| TA-AML3_APL5  |                | 0.48    | 0.76                                             | 0.56                                                         | 1.5                                                          | 9.32              | 1.16              | 0.76                              | 0.26    | -0.04                             | -0.16                | 0.42                | 65          | 128.98          | 110.69                    | 0.89      | 0.64         | 0.91       | -0.09               | -0.09                 | 0.12                 | -0.26        | -0.2                 | 0.65        | 131.18                                      | 118.38 | 0.02   | 61.95   | 51.72   | 1.22     | 0.6     | X        |     |
| TA-AML3_APL3  |                | 0.07    | 22.57                                            | 25.54                                                        | 47.65                                                        | 59.96             | 44.61             | 0.65                              | 41.2    | 0.1                               | -0.22                | 0                   | 46.89       | 32.01           | 45.95                     | 0.4       | -0.02        | -0.1       | -0.04               | 0                     | 7.75                 | 3.16         | 0.16                 | 1.72        | 285.83                                      | 124.21 | 0.54   | 348.88  | 139.59  | 0.53     | 1.04    | 0.16     |     |
| TA-AML2_APL4  |                | 0.3     | 11                                               | 8.66                                                         | 34.7                                                         | 63.98             | 33.47             | 3.42                              | 0.37    | 0.11                              | 0.12                 | 0.33                | 610.45      | 227.11          | 265.01                    | 0.66      | 0.35         | 0.84       | -0.05               | -0.06                 | 2.47                 | 0.23         | -0.22                | 0.84        | 288.66                                      | 105.6  | 1.62   | 29.12   | 219.48  | 0.91     | 1.53    | 1.12     |     |
| TA-AML4_APL1  |                | 1.92    | 12.54                                            | 11.18                                                        | 32.7                                                         | 36.45             | 29.36             | 12                                | 18.39   | 0.4                               | -0.19                | 0.12                | 78.49       | 330.68          | 89.5                      | 1.23      | 2            | 0.29       | -0.17               | -0.11                 | 0.32                 | -0.37        | -0.29                | 0.74        | 78.64                                       | 143.88 | 2.99   | 113.32  | 74.46   | 2.09     | -0.3    | 0.66     |     |
| TA-AML1_AML27 |                | 226.39  | 346.22                                           | 325.6                                                        | 195.14                                                       | 194.97            | 195.7             | 354.59                            | 109.01  | 59.51                             | 58.44                | 21.9                | 502.84      | 625.23          | 216.32                    | 1.21      | 2.67         | 29.88      | 0.15                | 0                     | 2.99                 | -0.01        | -0.14                | 32.65       | 247.98                                      | 11.97  | 0      | 556.51  | 221.43  | 3.15     | -0.02   | 5.95     |     |
| TA-AML3_AML7  |                | 137.18  | 557.87                                           | 515.49                                                       | 212.62                                                       | 234.96            | 187.78            | 1097.3                            | 276.03  | 1.68                              | 5.34                 | 326.9               | 438.52      | 253.81          | 155.29                    | 2.38      | 0.51         | -0.02      | -0.08               | -0.05                 | 0.89                 | -0.36        | -0.38                | 4.62        | 88.75                                       | 8.88   | -0.22  | 1084.37 | 460.17  | 2.97     | -0.24   | X        |     |
| TA-AML3_AML9  |                | 27.4    | 97.89                                            | 91.74                                                        | 43.12                                                        | 46.22             | 42.76             | 106.67                            | 28.87   | 20.71                             | 1.41                 | 78.09               | 200.11      | 111.51          | 134.17                    | 0.11      | 0.62         | 0.16       | 0.23                | 0.17                  | 3.95                 | -0.25        | -0.4                 | 107.98      | 323.03                                      | 8.13   | 0.15   | 384.83  | 24.6    | 0.56     | 2.65    | 0.76     |     |
| TA-AML2_AML20 |                | 206.51  | 313.01                                           | 332.07                                                       | 217.21                                                       | 94.39             | 229.08            | 380.25                            | 248.65  | 117.06                            | 1.69                 | 303.35              | 479.62      | 300.15          | 259.0                     | 1.69      | 33.36        | 1.55       | 0.38                | -0.03                 | 0.89                 | -0.11        | 0.03                 | 0.03        | 42.54                                       | 183.64 | 8.75   | 0.04    | 391.87  | 151.76   | 4.66    | 0.2      | 0.5 |
| TA-AML2_AML21 |                | 38.55   | 93.42                                            | 79.76                                                        | 81.73                                                        | 101.19            | 78.53             | 93.28                             | 34.98   | 11.23                             | 1.77                 | 20.74               | 54.35       | 71.97           | 97.6                      | 2.67      | 1.75         | 0.46       | 0.03                | 0.01                  | 1.14                 | -0.24        | -0.46                | 342.36      | 836.79                                      | 49.05  | 12.54  | 186.96  | 72.51   | 1.63     | 1.06    | 0.02     |     |
| TA-AML2_AML22 |                | 356.63  | 261.29                                           | 259.6                                                        | 217.5                                                        | 230.66            | 234.99            | 265.52                            | 181.98  | 111.92                            | 14.44                | 537.74              | 359.64      | 107.06          | 160.84                    | 1.32      | 109.32       | 1.99       | 0.3                 | 0.5                   | 3.78                 | 0.28         | -0.26                | 190.85      | 142.74                                      | 24.7   | 0.5    | 655.94  | 216.99  | 1.05     | 0.29    | X        |     |
| TA-AML2_AML23 |                | 140.61  | 88                                               | 89.48                                                        | 48.81                                                        | 43.43             | 48.91             | 93.42                             | 35.19   | 47.53                             | 28.22                | 126.57              | 162.26      | 269.57          | 240.68                    | 1.52      | 0.44         | -0.01      | -0.12               | -0.05                 | 2.87                 | -0.15        | -0.39                | 68.06       | 137.94                                      | 10.36  | 0.03   | 178.34  | 157.1   | 0.3      | -0.27   | 3.1      |     |
| TA-AML2_AML39 |                | 589.21  | 616.62                                           | 376.24                                                       | 90.94                                                        | 90.13             | 91.75             | 663.07                            | 605.58  | 1.16                              | 0.7                  | 1041.41             | 1474.6      | 1096.03         | 770.87                    | 0.59      | 0.86         | 0.47       | 0.36                | 0.32                  | 21.19                | -0.02        | -0.29                | 1.63        | 140.03                                      | 10.48  | 0.84   | 753.52  | 1213.88 | 0.78     | 0.85    | 1.09     |     |
| TA-AML4_AML37 |                | 2.76    | 27.55                                            | 22.27                                                        | 12.04                                                        | 20.5              | 11.51             | 54.92                             | 5.55    | 0.37                              | 0.86                 | 4.61                | 231.9       | 621.09          | 122.41                    | 0.26      | 2.58         | 0.97       | 0.15                | 0.1                   | -0.19                | -0.44        | -0.44                | 5.88        | 227.47                                      | 3.05   | -0.29  | 991.9   | 95.77   | 1        | 4.36    | -0.29    |     |
| TA-AML4_AML38 |                | 2.16    | 319.99                                           | 237.2                                                        | 21.53                                                        | 46.85             | 21.11             | 326.39                            | 4.23    | 13.06                             | -0.05                | 370.03              | 410.79      | 276.95          | 365.22                    | 0.03      | 0.65         | -0.09      | -0.11               | -0.12                 | 0.39                 | -0.38        | -0.44                | 367.01      | 205.17                                      | 26.63  | -0.33  | 654.83  | 122.5   | 0.95     | 321.65  | -0.29    |     |
| TA-AML4_AML40 |                | 16.65   | 232.19                                           | 228.13                                                       | 217.33                                                       | 157.19            | 225.26            | 274.08                            | 257.02  | 14.45                             | 3.26                 | 552.97              | 506.6       | 127.23          | 73.11                     | 0.88      | 8.37         | -0.26      | -0.32               | -0.29                 | 1.65                 | -0.26        | -0.38                | 233.33      | 1176.57                                     | 2.07   | -0.09  | 1448.69 | 410.19  | 0.28     | 1.69    | -0.16    |     |
| TA-AML3_AML6  |                | 101.21  | 272.8                                            | 260.74                                                       | 289.43                                                       | 257.39            | 293.72            | 211.22                            | 95.74   | 116.51                            | 2.63                 | 154.04              | 255.56      | 73.68           | 50.14                     | 4.57      | 101.23       | 0.36       | 0.46                | 0.26                  | 314.47               | -0.18        | -0.4                 | 74          | 52.92                                       | 7.97   | -0.02  | 952.94  | 174.21  | 1.37     | 1.62    | 0.78     |     |
| TA-AML2_AML31 | FLT3-TKD+      | 128.32  | 63.42                                            | 63.08                                                        | 55.3                                                         | 55.98             | 55.02             | 65.06                             | 71.74   | 89.62                             | 59.48                | 141.93              | 102.53      | 187.42          | 267.3                     | 3.71      | 79.07        | 90.39      | -0.02               | -0.05                 | 59.88                | 87.58        | 117.89               | 210         | 455.21                                      | 34.16  | -0.12  | 112.04  | 110.76  | 1.46     | -0.04   | 1.75     |     |
| TA-AML4_AML8  | NK-AML         | -0.11   | 115.4                                            | 114.05                                                       | 111.38                                                       | 134.77            | 105.4             | 114.05                            | 134.31  | 9.82                              | -0.41                | 1055.85             | 186.35      | 83.68           | 92.33                     | 4.08      | -0.17        | -0.27      | -0.25               | -0.24                 | 9.96                 | -0.02        | -0.47                | 81.67       | 123.41                                      | 5.51   | -0.32  | 198.86  | 249.38  | 1.05     | 8.67    | 0.06     |     |
| TA-AML1_AML13 |                | 1.02    | 28.49                                            | 27.14                                                        | 24.89                                                        | 26.94             | 24.89             | 37.35                             | 40.12   | 9.71                              | 8.76                 | 42.76               | 178.22      | 52.4            | 44.07                     | 3.79      | 0            | 0          | -0.11               | 0                     | 19.08                | 4.06         | -0.15                | 118.38      | 192.57                                      | 2.87   | -0.06  | 390.72  | 87.39   | 0.32     | 0       | 0        |     |
| TA-AML3_AML36 |                | 0.3     | 133.12                                           | 137.61                                                       | 130.19                                                       | 36.24             | 137               | 300.06                            | 344.03  | 47.54                             | 0.65                 | 145.56              | 71.58       | 64.54           | 48                        | 0.81      | 0.78         | -0.14      | -0.29               | -0.27                 | 16.69                | 5.27         | -0.13                | 10.13       | 531.22                                      | 3.7    | -0.15  | 39.25   | 367.89  | 0.26     | -0.2    | -0.2     |     |
| TA-AML3_AML33 |                | 2.12    | 128.77                                           | 128.81                                                       | 132.71                                                       | 112.39            | 136.22            | 128.39                            | 359.1   | 37.95                             | 0.09                 | 414.77              | 323.02      | 152.01          | 284.37                    | 2.43      | 1.18         | 0.56       | 0.27                | 0.28                  | 5.57                 | 0.21         | -0.37                | 325.72      | 530.97                                      | 4.06   | 1.01   | 441.87  | 89.88   | 1.4      | 2.1     | 2.19     |     |
| TA-AML2_AML42 |                | 0.27    | 137.57                                           | 142.21                                                       | 143.02                                                       | 134.73            | 162.03            | 120.79                            | 307.44  | 48.97                             | 1.15                 | 200.02              | 133.01      | 67.23           | 85.96                     | 1.42      | 0.59         | -0.23      | -0.28               | -0.26                 | 6.98                 | 2.16         | -0.12                | 197.67      | 189.97                                      | 8.17   | -0.04  | 63.87   | 68.45   | 1.45     | -0.13   | 0.34     |     |
| TA-AML4_AML14 |                | 7.57    | 38.2                                             | 37.96                                                        | 37.37                                                        | 45.97             | 35.62             | 56.12                             | 48.05   | 5                                 | 14.24                | 108.64              | 81.44       | 35.61           | 57.17                     | 2.8       | 0.38         | -0.35      | -0.33               | -0.2                  | 0.98                 | -0.06        | -0.36                | 230.55      | 526.81                                      | 9.92   | 1.9    | 73.98   | 124.78  | 0.46     | -0.3    | -0.25    |     |
| TA-AML4_AML15 |                | 13.05   | 103.09                                           | 99.83                                                        | 77.34                                                        | 48.55             | 82.71             | 131.85                            | 137.92  | 12.33                             | 0.74                 | 114                 | 185.95      | 54.15           | 108.08                    | 2.49      | 81.67        | 141.24     | -0.33               | -0.27                 | 53.52                | 5.67         | -0.44                | 78.1        | 477.72                                      | 22.47  | -0.21  | 34.17   | 326.76  | 0.3      | 1.96    | -0.13    |     |
| TA-AML2_AML22 | MLL (t(10;11)) | 2606.75 | 3767.68                                          | 3765.04                                                      | 2564.72                                                      | 2345.78           | 2568.83           | 3853.77                           | 2591.75 | 2195.12                           | 2277.33              | 2992.4              | 1703.48     | 1111.55         | 644.38                    | 0.13      | 1.55         | 0.01       | -0.07               | 0.06                  | 1.9                  | -0.13        | -0.3                 | 1797.29     | 462.44                                      | 5.73   | 0.3    | 4188.22 | 971.53  | 1.32     | 0.21    | 5.51     |     |
| TA-AML1_AML18 |                | 372.51  | 288.57                                           | 288.67                                                       | 160.99                                                       | 82.23             | 194.65            | 334.96                            | 241.91  | 12.77                             | 0.15                 | 477.79              | 400.2       | 102.07          | 110.47                    | 1.92      | 220.12       | 1.15       | 0                   | 0                     | 7.92                 | 0.82         | -0.23                | 295.03      | 259.29                                      | 13.42  | 4.95   | 1662.39 | 56.25   | 1.89     | 0.75    | 2.79     |     |
| TA-AML3_AML4  |                | 3.03    | 301.86                                           | 306.83                                                       | 306.83                                                       | 271.75            | 321.96            | 288.21                            | 393.9   | 14.15                             | -0.18                | 295.34              | 392.83      | 153.25          | 69.05                     | 0.63      | 0.58         | -0.04      | -0.05               | -0.16                 | 8.23                 | -0.26        | -0.41                | 54.17       | 259.13                                      | 4.08   | -0.1   | 167.33  | 319.46  | 0.8      | -0.16   | -0.19    |     |
| TA-AML2_AML19 |                | 277.4   | 343.72                                           | 417.1                                                        | 297.2                                                        | 267.58            | 302.4             | 394.81                            | 308.58  | 22.94                             | 30.56                | 736.94              | 306.81      | 222.05          | 436.55                    | 2.44      | 406.37       | 67.93      | 15.89               | 3.37                  | 1221.75              | -0.16        | -0.18                | 147.63      | 613.2                                       |        |        |         |         |          |         |          |     |

**CD38 Median**

|               | Ungated | CD34+CD38 <sup>low</sup> | CD49b <sup>neg</sup> CD34 <sup>int</sup> CD38 <sup>low</sup> | CD33 <sup>neg</sup> CD3 <sup>4</sup> CD38 <sup>low</sup> | HSC-90hi13 <sup>neg</sup> | MPP-90 <sup>low</sup> 33 <sup>he</sup> | CMP-CD34 <sup>int</sup> CD38 <sup>mid</sup> | GMP    | 34negCD38 | 34neg38neg | Myelo/Mon | ProMono | CD14 <sup>neg</sup> Mono | CD14 <sup>+</sup> Mono | 11b+DR <sup>neg</sup> Mono | ProMyelo | Myelocytes | Meta-myelocytes | Mature Granulocyte | Pro-erythroblast | Erythroblast | Late Erythroblast | Pre-B Cells | Mature B cells CD20+CD19 <sup>+</sup> | Plasma  | T Cell | pDC    | mDC    | Basophi | NK Cell | Platelet |      |
|---------------|---------|--------------------------|--------------------------------------------------------------|----------------------------------------------------------|---------------------------|----------------------------------------|---------------------------------------------|--------|-----------|------------|-----------|---------|--------------------------|------------------------|----------------------------|----------|------------|-----------------|--------------------|------------------|--------------|-------------------|-------------|---------------------------------------|---------|--------|--------|--------|---------|---------|----------|------|
| TA-AML1_AML26 | 8.72    | 15.14                    | 14.87                                                        | 14.71                                                    | 16.54                     | 13.79                                  | 16.79                                       | 125.65 | 69.77     | 8.15       | 113.91    | 70.73   | 49.99                    | 45.65                  | 12.43                      | 14.19    | 6.13       | 5.08            | 4.82               | 6.09             | 5.17         | 2.24              | 153.13      | 5.13                                  | 1979.15 | 2.33   | 157.45 | 0.84   | 126.05  | 79.34   | 18.9     |      |
| TA-AML3_AML35 | 56.35   | 21.74                    | 21.65                                                        | 21.57                                                    | 23.57                     | 20.98                                  | 22.14                                       | 167.16 | 93.06     | 4.36       | 134.05    | 122.34  | 123.03                   | 84.31                  | 64.9                       | 38.35    | 9.12       | 6.79            | 6.35               | 214.36           | 5.28         | 2.7               | 464.77      | 5.61                                  | 2224.7  | 2.59   | 169    | 119.23 | 98.14   | 214.72  | 0.65     | 6.61 |
| TA-AML3_AML5  | 64.35   | 19.03                    | 19.54                                                        | 19.39                                                    | 19.68                     | 19.16                                  | 18.36                                       | 379.7  | 109.91    | 14.73      | 270.88    | 199.15  | 140.02                   | 85.36                  | 23.28                      | 93.12    | 10.33      | 8.11            | 5.64               | 25.24            | 5.83         | 1.9               | 374.78      | 4.45                                  | 2854.88 | 1.54   | 348.39 | 6.22   | 104.66  | 24.99   | 6.61     |      |
| TA-AML1_AML10 | 40.89   | 17.8                     | 17.81                                                        | 18.01                                                    | 17.92                     | 18.06                                  | 17.69                                       | 179.04 | 122.87    | 17.45      | 74.76     | 60.1    | 76.01                    | 41.83                  | 33.57                      | 53.37    | 15.19      | 13.84           | 8.56               | 135.79           | 5.72         | 56.06             | 605.36      | 5.63                                  | 2496.39 | 2.36   | 151.67 | 6.14   | 166.95  | 119.16  | 4.51     |      |
| TA-AML2_AML2  | 42.15   | 20.32                    | 20.32                                                        | 19.62                                                    | 20.24                     | 19.5                                   | 21.48                                       | 76.43  | 626.13    | 1          | 78.32     | 59.12   | 69.11                    | 34.17                  | 86.52                      | 61.82    | 31.97      | 11.63           | 7.17               | 15.4             | 4.69         | 1                 | 699.4       | 5.18                                  | 2766.98 | 0.88   | 105.46 | 29.48  | 194.04  | 69.95   | 33.75    |      |
| TA-AML3_AML5  | 57.99   | 16.24                    | 17.07                                                        | 9.24                                                     | 6.52                      | 9.55                                   | 16.43                                       | 60.8   | 63.46     | 17.35      | 67.96     | 18.09   | 27.88                    | 125.62                 | 66.6                       | 61.75    | 45.47      | 6.12            | 4.98               | 64.17            | 5.7          | 44.37             | 127.87      | 4.43                                  | 1714.64 | 2.66   | 31.53  | 3.02   | 88.48   | 71.07   | X        |      |
| TA-AML3_AML4  | 38.18   | 12.01                    | 11.98                                                        | 9.64                                                     | 9.21                      | 10.33                                  | 16.74                                       | 12.14  | 114.9     | 20.71      | 123.48    | 193.02  | 151                      | 131.89                 | 82.52                      | 78.71    | 6.87       | 5.52            | 5.01               | 13.68            | 7.7          | 4.07              | 197.07      | 5.46                                  | 1815.8  | 9.66   | 107.05 | 6.12   | 115.87  | 120.39  | 59.31    |      |
| TA-AML3_AML4  | 156.5   | 11.75                    | 8.6                                                          | 6.33                                                     | 5.44                      | 7.26                                   | 15.83                                       | 131.33 | 157.94    | 22.9       | 190.7     | 40.29   | 90.91                    | 227.22                 | 177.58                     | 120.71   | 73.51      | 6.36            | 8.15               | 14.05            | 5.97         | 3.65              | 187.26      | 2.78                                  | 1980.19 | 1.77   | 228.93 | 4.11   | 233.05  | 77.23   | 103.12   |      |
| TA-AML4_AML1  | 174.27  | 22.02                    | 22.12                                                        | 10.05                                                    | 6.93                      | 11.77                                  | 22.17                                       | 119.57 | 112.65    | 9.85       | 192.81    | 227.6   | 191.75                   | 152.2                  | 201.4                      | 103.05   | 8.41       | 5.76            | 6.67               | 200.94           | 7.65         | 8.32              | 142.98      | 2.64                                  | 2087.53 | 2.27   | 338.63 | 6.07   | 293.11  | 120.75  | 14.79    |      |
| TA-AML1_AML27 | 58.21   | 2.19                     | 2.51                                                         | 2.01                                                     | 1.75                      | 2.04                                   | 2.2                                         | 56.39  | 70.7      | 12.41      | 108.58    | 5.87    | 2.54                     | 273.71                 | 49.37                      | 95.49    | 16.14      | 6.62            | 4.88               | 24.8             | 5.12         | 1.45              | 176.71      | 3.48                                  | 2667.33 | 3.79   | 5.48   | 16.5   | 85.74   | 152.46  | 24.6     |      |
| TA-AML3_AML7  | 93.87   | 3.99                     | 3.57                                                         | 1.55                                                     | 1.35                      | 1.66                                   | 6.34                                        | 220.76 | 169.39    | 2.15       | 536.71    | 129.06  | 103.7                    | 104.05                 | 239.22                     | 220.44   | 20.13      | 38.19           | 42.22              | 46.59            | 3.4          | 1.55              | 329.97      | 2.47                                  | 2792.82 | 3.53   | 45.15  | 91.11  | 448.1   | 90.33   | X        |      |
| TA-AML3_AML9  | 12.72   | 8.18                     | 9.05                                                         | 7.36                                                     | 7.74                      | 7.31                                   | 8.42                                        | 60.33  | 161.85    | 5.74       | 53.41     | 83.19   | 232.24                   | 155.92                 | 18.44                      | 19.47    | 13.35      | 15.95           | 9.63               | 43.45            | 4.63         | 0.98              | 525.37      | 0.56                                  | 1996.23 | 3.24   | 121    | 3.83   | 248.05  | 49.93   | 5.93     |      |
| TA-AML2_AML2  | 426.5   | 10.17                    | 8.41                                                         | 5.84                                                     | 1.96                      | 6.04                                   | 12.13                                       | 468    | 419.07    | 17.25      | 490.48    | 262.59  | 237.45                   | 165.54                 | 35.33                      | 232.27   | 14.44      | 9.9             | 5.29               | 17.27            | 6.26         | 3.3               | 361.72      | 2.5                                   | 3100.49 | 3.67   | 548.7  | 10.28  | 980.42  | 170.9   | 8.19     |      |
| TA-AML2_AML21 | 14.58   | 6.94                     | 8.1                                                          | 5.03                                                     | 4.27                      | 5.16                                   | 7.08                                        | 61.99  | 104.06    | 8.45       | 61.54     | 47.27   | 117.36                   | 77.43                  | 46.84                      | 38.89    | 9.67       | 4.74            | 4.63               | 5.9              | 4.11         | 1.47              | 473.87      | 17.76                                 | 2005.41 | 12.67  | 81.3   | 0.22   | 83.34   | 189.24  | 3.9      |      |
| TA-AML2_AML21 | 111.5   | 4.5                      | 4.75                                                         | 3.81                                                     | 2.9                       | 3.52                                   | 4.57                                        | 77.43  | 107.91    | 14.04      | 247.82    | 78.3    | 115.66                   | 88.81                  | 89.31                      | 72.47    | 25.43      | 22.96           | 17.4               | 10.1             | 5.65         | 1.95              | 175.01      | 2.06                                  | 2705.2  | 1.57   | 41.02  | 2.67   | 426.53  | 41.33   | X        |      |
| TA-AML2_AML21 | 70.54   | 2.89                     | 3.74                                                         | 3.81                                                     | 2.17                      | 3.86                                   | 2.81                                        | 74.54  | 82.04     | 11.22      | 46.47     | 9.49    | 282.5                    | 315.52                 | 43.21                      | 45.38    | 16.88      | 16.15           | 21.92              | 22.25            | 6.06         | 4.07              | 138.57      | 4.68                                  | 2485.87 | 3.16   | 2.55   | 6.43   | 386.16  | 144.6   | 20.26    |      |
| TA-AML2_AML39 | 142.43  | 12.51                    | 13.89                                                        | 1.38                                                     | 2.48                      | 1.16                                   | 13.36                                       | 133.23 | 104.29    | 13.68      | 335.99    | 157.21  | 371.3                    | 237.88                 | 54.09                      | 85.48    | 28.34      | 20.48           | 7.79               | 235.58           | 6.22         | 3.25              | 176.96      | 0.74                                  | 3075.35 | 2.15   | 24.17  | 9.78   | 96.02   | 46.32   | 5.45     |      |
| TA-AML4_AML37 | 4.12    | 1.88                     | 1.82                                                         | 1.64                                                     | 1.91                      | 1.63                                   | 2.1                                         | 44.44  | 57.15     | 3.47       | 4.49      | 1.93    | 1.36                     | 14.9                   | 6.8                        | 6.76     | 6.18       | 44.46           | 10.44              | 7.36             | 6.15         | 2.05              | 497.58      | 2.08                                  | 2514.34 | 2.83   | -0.18  | 3.92   | 38.21   | 13.11   | 7.66     |      |
| TA-AML4_AML38 | 11.72   | 1.83                     | 2.83                                                         | 3.76                                                     | 1.67                      | 3.8                                    | 1.81                                        | 65.5   | 106.49    | 4.45       | 84.89     | 5.78    | 135.53                   | 97.33                  | 16.8                       | 30.15    | 15.67      | 16.13           | 12.02              | 8.51             | 5.42         | 0.99              | 154.49      | 3.39                                  | 2290.86 | 4.62   | 1.34   | 0.85   | 88.75   | 17.44   | 6.03     |      |
| TA-AML4_AML30 | 87.05   | 15.77                    | 15.7                                                         | 14.6                                                     | 18.7                      | 14.3                                   | 18.24                                       | 87.84  | 397.55    | 6.88       | 376.31    | 162.75  | 232.66                   | 175.36                 | 29.84                      | 134.52   | 19.13      | 20.2            | 39.95              | 83.88            | 6.83         | 1.98              | 459.18      | 4.1                                   | 3235.55 | 5.98   | 120.81 | 182.39 | 446.39  | 190.77  | 3.23     |      |
| TA-AML3_AML6  | 145.29  | 16.86                    | 16.9                                                         | 14.67                                                    | 12.06                     | 15.19                                  | 20.97                                       | 146.11 | 167.78    | 18.77      | 181.73    | 58.54   | 152.18                   | 110.96                 | 109.2                      | 124.33   | 6.43       | 12.69           | 7.34               | 146.13           | 4.66         | 1.41              | 267.44      | 1.7                                   | 2265.34 | 2.96   | 89.52  | 175.93 | 216.35  | 29.62   | 6.05     |      |
| TA-AML2_AML31 | 41.53   | 6.96                     | 6.9                                                          | 5.97                                                     | 6.21                      | 5.95                                   | 7.24                                        | 77.78  | 71.65     | 14.18      | 46.09     | 21.44   | 49.62                    | 89.9                   | 46.48                      | 30.7     | 35.64      | 6.42            | 5.07               | 24.95            | 22.92        | 48.71             | 146.47      | 5.15                                  | 2139.26 | 4.69   | 5.57   | 30.84  | 93.84   | 89.93   | 4.08     |      |
| TA-AML4_AML8  | 8.48    | 21.35                    | 20.47                                                        | 19.34                                                    | 20.51                     | 18.97                                  | 22.39                                       | 98.48  | 123.17    | 0.16       | 232.96    | 168.22  | 187.71                   | 139.19                 | 63.93                      | 36.52    | 18.16      | 16.79           | 17.6               | 50.69            | 7.54         | -0.1              | 229.2       | 2.09                                  | 2205.82 | 1.27   | 108.33 | 2.11   | 675.44  | 80.48   | 6.43     |      |
| TA-AML1_AML13 | 2.86    | 13.95                    | 13.93                                                        | 12.83                                                    | 14.54                     | 12.65                                  | 16.28                                       | 54.66  | 54.79     | 7.18       | 18.92     | 5.38    | 4.88                     | 4.07                   | 4.05                       | 3.67     | 2.75       | 2.37            | 3.64               | 4.34             | 3.58         | 1.24              | 463.43      | 0.9                                   | 1943.16 | 0.58   | 5.25   | -0.12  | 43.3    | 17.07   | 0.41     |      |
| TA-AML3_AML33 | 5.8     | 19.3                     | 19.23                                                        | 18.98                                                    | 14.15                     | 19.09                                  | 22.34                                       | 70.37  | 75.35     | 2.86       | 64.02     | 28.34   | 22.51                    | 20.04                  | 38.21                      | 15.52    | 11.26      | 10.83           | 11.11              | 5.25             | 4.73         | 1.71              | 326.17      | -0.22                                 | 2690.12 | 1.67   | 18.14  | -0.41  | 129.18  | 16.74   | 0.61     |      |
| TA-AML3_AML36 | 11.71   | 26.71                    | 27.24                                                        | 26.76                                                    | 23.69                     | 27.42                                  | 27.31                                       | 285.97 | 505.76    | 0.79       | 359.58    | 203.89  | 94.17                    | 69.68                  | 78.83                      | 20.93    | 7.61       | 6.02            | 5.5                | 108.11           | 7.71         | 1.39              | 493.26      | 134.49                                | 3231.63 | 4.01   | 101.09 | 0.3    | 244.67  | 206.39  | 18.52    |      |
| TA-AML2_AML42 | 6.8     | 14.18                    | 14.16                                                        | 14.16                                                    | 13.66                     | 14.18                                  | 18.64                                       | 79.68  | 4.92      | 40.49      | 33.66     | 15.77   | 15.47                    | 12.43                  | 11.24                      | 4.39     | 4.67       | 4.18            | 6.89               | 5.45             | 1.83         | 208.41            | 2.77        | 2020.06                               | 4.24    | 12.87  | 259.23 | 274.14 | 27.83   | 1.47    |          |      |
| TA-AML4_AML4  | 14.78   | 16.63                    | 16.62                                                        | 16.46                                                    | 18.99                     | 15.97                                  | 18.2                                        | 64.3   | 177.79    | 0.9        | 7.86      | 22.59   | 45.74                    | 29.04                  | 29.98                      | 12.66    | 1.72       | 2.72            | 4.52               | 6.23             | 5.05         | 1.18              | 439.87      | 14.86                                 | 1754.14 | 14.32  | 25.15  | 2.21   | 227.01  | 253.53  | 2.44     |      |
| TA-AML4_AML15 | 29.07   | 22.07                    | 21.62                                                        | 19.84                                                    | 20.7                      | 19.73                                  | 24.85                                       | 80.94  | 73.85     | 13.13      | 79.14     | 83.55   | 72.06                    | 21.08                  | 49.39                      | 67.1     | 63.79      | 11.39           | 13.5               | 9.92             | 5.31         | 1.09              | 399.29      | 1.73                                  | 1782.79 | 3.61   | 34.51  | -0.35  | 76.49   | 8.35    | 2.9      |      |
| TA-AML2_AML22 | 42.76   | 14.08                    | 14.02                                                        | 6.34                                                     | 5.74                      | 6.36                                   | 14.69                                       | 79.27  | 95.45     | 13.69      | 63.63     | 198.09  | 319.43                   | 304.93                 | 21.5                       | 39.62    | 15.62      | 12.87           | 7.32               | 30.93            | 4            | 1.11              | 404.38      | 3.85                                  | 2482.88 | 7.45   | 40.59  | 192.46 | 446.8   | 290.36  | 5.69     |      |
| TA-AML1_AML18 | 397.69  | 24.41                    | 24.11                                                        | 15.21                                                    | 2.49                      | 19.92                                  | 25.83                                       | 238.8  | 281.69    | 0.97       | 493.32    | 424.28  | 136.21                   | 73.2                   | 58.18                      | 197.34   | 22.27      | 10.72           | 9.75               | 27.63            | 5.64         | 2.1               | 401.27      | 16.79                                 | 4205.91 | 7.22   | 281.27 | 0.14   | 362.16  | 179.02  | 10.01    |      |
| TA-AML3_AML4  | 19.12   | 7.58                     | 7.45                                                         | 6.96                                                     | 8.84                      | 6.23                                   | 9.34                                        | 107.99 | 723.69    | 0.49       | 205.24    | 108.66  | 70.57                    | 48.01                  | 77.61                      | 70.87    | 18.66      | 12.2            | 6.35               | 240.21           | 6.7          | 1.23              | 291.31      | 5.22                                  | 2360.39 | 5.55   | 231.73 | 1.82   | 217.32  | 156.15  | 3.01     |      |
| TA-AML2_AML19 | 13.61   | 10.58                    | 9.6                                                          | 6.41                                                     | 7.51                      | 6.22                                   | 12.66                                       | 55.11  | 119.39    | 3.46       | 51.1      | 47.96   | 27.71                    | 59.72                  | 8.04                       | 29.76    | 36.5       | 18.82           | 10.79              | 83.47            | 4.02         | 1.66              | 805.27      | 1.74                                  | 2296.79 | 11.98  | 27.99  | 0.84   | 75.71   | 52.44   | 10.2     |      |

| Sample ID     | CD14 Median |                            |                                                               |                                                           |                            |                                          |                                           |       |                                             |                                            |                  |             |                          |                        |                            |              |            |                 |                    |                  |              |                   |             |                                                    |        |        |       |       |          |         |          |
|---------------|-------------|----------------------------|---------------------------------------------------------------|-----------------------------------------------------------|----------------------------|------------------------------------------|-------------------------------------------|-------|---------------------------------------------|--------------------------------------------|------------------|-------------|--------------------------|------------------------|----------------------------|--------------|------------|-----------------|--------------------|------------------|--------------|-------------------|-------------|----------------------------------------------------|--------|--------|-------|-------|----------|---------|----------|
|               | Ungated     | CD34+CD38 <sup>lo</sup> ov | CD45R4 <sup>lo</sup> CD34 <sup>hi</sup> CD38 <sup>hi</sup> ov | CD33 <sup>neg</sup> CD34 <sup>+</sup> CD38 <sup>low</sup> | HSC-90hi133 <sup>neg</sup> | MPP-90 <sup>low</sup> 33 <sup>ne g</sup> | CMP-CD34 <sup>+</sup> CD33 <sup>mid</sup> | GMP   | 34 <sup>neg</sup> CD38 <sup>+</sup> +Undiff | 34 <sup>neg</sup> 38 <sup>neg</sup> Undiff | Myelo/Mon oblast | ProMonocyte | CD14 <sup>neg</sup> Mono | CD14 <sup>+</sup> Mono | 11b+DR <sup>neg</sup> Mono | ProMyelocyte | Myelocytes | Meta-myelocytes | Mature Granulocyte | Pro-erythroblast | Erythroblast | Late Erythroblast | Pre-B Cells | Mature B cells CD20 <sup>+</sup> CD19 <sup>+</sup> | Plasma | T Cell | pDC   | mDC   | Basophil | NK Cell | Platelet |
| TA-AML1_AML26 | 0.38        | -0.11                      | -0.15                                                         | -0.15                                                     | -0.07                      | -0.18                                    | 0                                         | 0     | 0.73                                        | 1.53                                       | 4.88             | 56.7        | 2.31                     | 0.53                   | 0.57                       | 0.65         | 0.72       | 1.19            | 2.78               | 2.03             | 1.66         | -0.16             | 5.7         | -0.04                                              | 1.2    | 0      | 1.65  | 1.19  | 1.22     |         |          |
| TA-AML3_AML35 | 0.38        | -0.18                      | -0.19                                                         | -0.19                                                     | -0.1                       | -0.22                                    | -0.13                                     | 0     | 0.61                                        | 0.1                                        | 0.52             | 0.99        | 1.35                     | 65.49                  | 0.96                       | 0.77         | 0.58       | 0.56            | 0.62               | 0.99             | 3.34         | 2.9               | 3           | -0.24                                              | 3.3    | -0.13  | 0.18  | 1.65  | 1.26     | 1.39    | 17.13    |
| TA-AML3_AML5  | 0.81        | -0.06                      | -0.08                                                         | -0.09                                                     | 0.11                       | -0.14                                    | 0.11                                      | 0.38  | 0.98                                        | 0.3                                        | 0.9              | 1.86        | 7.67                     | 129.1                  | 1.12                       | 1.13         | 0.69       | 0.59            | 0.86               | 3.43             | 7.15         | 3.59              | 1.93        | -0.22                                              | 4.52   | -0.11  | 0.87  | 0.61  | 1.14     | 0.45    | 0.25     |
| TA-AML1_AML10 | 1.52        | 0.65                       | 0.64                                                          | 0.45                                                      | 0.68                       | 0.37                                     | 0.76                                      | 1.03  | 1.48                                        | 0.26                                       | 1.19             | 3.43        | 6.56                     | 131.99                 | 40.15                      | 1.1          | 2.24       | 4.4             | 5.25               | 0.86             | 5.57         | 6.25              | 4           | -0.03                                              | 13.26  | 0      | 0.89  | 20.87 | 1.34     | 1.37    | 0.62     |
| TA-AML2_AML32 | 0.42        | 0.22                       | 0.21                                                          | 0.18                                                      | 0.39                       | 0.14                                     | 0.27                                      | 0.37  | 2.02                                        | -0.23                                      | 0.5              | 7.26        | 10.92                    | 62.11                  | 1.72                       | 0.52         | 1.8        | 1.33            | 0.95               | 0.84             | 6.7          | 9.8               | 4           | -0.2                                               | 5.35   | -0.07  | 0.48  | 8.79  | 1.39     | 0.73    | 0.11     |
| TA-AML3_AML5  | 0.86        | 0.55                       | 0.54                                                          | 0.09                                                      | 0.23                       | 0.09                                     | 0.56                                      | 0.5   | 0.8                                         | 0.41                                       | 0.9              | 0.6         | 0.71                     | 105.52                 | 1.12                       | 1.23         | 1.17       | 0.54            | 0.56               | 0.46             | 4.59         | 4.21              | 1.82        | -0.2                                               | 1.44   | -0.13  | -0.13 | 0.48  | 1.25     | 1.09    | X        |
| TA-AML3_AML3  | 0.84        | 0.32                       | 0.28                                                          | -0.04                                                     | -0.21                      | 0.09                                     | 0.72                                      | 1.03  | 1.09                                        | 0.52                                       | 1.28             | 4.28        | 10.52                    | 87.79                  | 1.85                       | 1.22         | 0.62       | 0.59            | 0.74               | 0.9              | 4.25         | 3.59              | 1.72        | -0.19                                              | 2.43   | -0.01  | 1.72  | 0.91  | 1.84     | 1.03    | 1.01     |
| TA-AML2_AML4  | 1.08        | 0.24                       | 0.09                                                          | 0.01                                                      | -0.13                      | 0.04                                     | 0.39                                      | 1.2   | 1.15                                        | 0.51                                       | 1.31             | 0.37        | 0.82                     | 56.65                  | 1.53                       | 1.3          | 1.26       | 0.53            | 0.67               | 0.16             | 4.62         | 3.96              | 2.02        | -0.22                                              | 2.26   | -0.11  | 0.73  | -0.01 | 1.43     | 0.74    | 1.17     |
| TA-AML4_AML1  | 1.19        | 0.53                       | 0.51                                                          | -0.16                                                     | -0.1                       | -0.16                                    | 0.55                                      | 0.68  | 0.81                                        | 0.04                                       | 1.21             | 1.81        | 1.14                     | 79.46                  | 1.96                       | 1.41         | 0.48       | 0.46            | 0.66               | 1.12             | 5.27         | 3.96              | 2.36        | -0.28                                              | 2.54   | -0.2   | 0.64  | 0.71  | 2.17     | 1.13    | 0        |
| TA-AML1_AML27 | 0.83        | 0                          | 0                                                             | -0.06                                                     | -0.01                      | -0.07                                    | 0                                         | 0.81  | 1.05                                        | 0.36                                       | 1                | 0.33        | 0.01                     | 64.6                   | 1.23                       | 1.43         | 0.91       | 0.52            | 0.62               | 0.79             | 5.47         | 10.16             | 2.39        | -0.07                                              | 7.84   | 0      | -0.15 | 0.9   | 1.77     | 1.37    | 1.04     |
| TA-AML3_AML7  | 2.53        | -0.29                      | -0.34                                                         | -0.36                                                     | -0.56                      | -0.27                                    | -0.21                                     | 1.37  | 0.87                                        | -0.17                                      | 0.8              | 0.7         | 2.03                     | 57.58                  | 3.81                       | 1.52         | 1.03       | 1.32            | 1.72               | 0.93             | 7.31         | 6.82              | 1.23        | -0.23                                              | 4.1    | -0.09  | -0.13 | 1.78  | 1.65     | 0.87    | X        |
| TA-AML3_AML9  | 0.66        | 0.13                       | 0.12                                                          | -0.04                                                     | 0.07                       | -0.05                                    | 0.16                                      | 0.54  | 1.29                                        | -0.03                                      | 0.72             | 0.85        | 3.14                     | 48.57                  | 0.56                       | 0.68         | 0.67       | 0.78            | 0.91               | 1.39             | 6.4          | 6.77              | 1.6         | -0.23                                              | 2.96   | 0      | -0.24 | 0.33  | 1.13     | 0.32    | 0.5      |
| TA-AML2_AML20 | 1.27        | 0.03                       | -0.06                                                         | -0.08                                                     | 0.11                       | -0.14                                    | 0.26                                      | 1.06  | 1.43                                        | 0.34                                       | 1.22             | 1.18        | 5.34                     | 55.3                   | 1                          | 1.58         | 0.79       | 0.61            | 0.58               | 0.64             | 6.42         | 5.9               | 1.7         | -0.14                                              | 3.82   | -0.02  | 2.62  | 0.86  | 1.94     | 1.03    | 1.43     |
| TA-AML2_AML21 | 0.47        | 0.28                       | 0.29                                                          | -0.01                                                     | 0.24                       | -0.03                                    | 0.29                                      | 0.62  | 1.18                                        | 0.24                                       | 0.85             | 1.08        | 5.43                     | 78.14                  | 1.06                       | 0.84         | 0.69       | 0.48            | 0.7                | 0.47             | 6.78         | 7.03              | 2.31        | -0.08                                              | 3.21   | 0.18   | 0.37  | 0.2   | 1.36     | 1.31    | 1.17     |
| TA-AML2_AML23 | 0.55        | 0.02                       | 0.02                                                          | -0.07                                                     | -0.03                      | -0.08                                    | 0.04                                      | 0.57  | 0.74                                        | 0                                          | 0.65             | 0.81        | 3.8                      | 92.23                  | 1.68                       | 1.05         | 0.91       | 0.73            | 0.77               | 0.58             | 4.32         | 4.69              | 1.52        | -0.21                                              | 3.82   | -0.06  | -0.03 | 0.82  | 1.64     | 0.5     | X        |
| TA-AML2_AML30 | 2.32        | 0.02                       | 0.04                                                          | 0                                                         | -0.09                      | 0                                        | 0.03                                      | 0.52  | 0.73                                        | 0.13                                       | 0.44             | 0.34        | 3.52                     | 251.58                 | 1.44                       | 0.76         | 0.65       | 0.61            | 0.83               | 1.52             | 6.41         | 3.89              | 2.22        | -0.17                                              | 4.51   | -0.01  | -0.09 | 3.13  | 0.15     | 1.25    | 0.9      |
| TA-AML2_AML39 | 3.15        | -0.14                      | -0.13                                                         | -0.25                                                     | -0.33                      | -0.25                                    | -0.12                                     | 0.21  | 0.91                                        | 0.15                                       | 0.41             | 0.42        | 2.98                     | 231.64                 | 0.93                       | 1.14         | 0.89       | 0.84            | 0.87               | 0.36             | 4.73         | 3.41              | 1.6         | -0.25                                              | 5.16   | -0.11  | -0.12 | 8.19  | 0.75     | 0.44    | 1.84     |
| TA-AML4_AML37 | 0.29        | 0.1                        | 0.05                                                          | -0.03                                                     | 0.19                       | -0.04                                    | 0.22                                      | 0.71  | 0.77                                        | 0.09                                       | 0.27             | 0.08        | -0.11                    | 70.96                  | 0.49                       | 0.58         | 1.1        | 1.35            | 2.26               | 0.41             | 4.55         | 4.05              | 2.96        | -0.34                                              | 4.65   | -0.16  | -0.52 | 0.51  | 0.72     | 0.43    | 0.46     |
| TA-AML4_AML38 | 1.45        | -0.03                      | -0.08                                                         | -0.3                                                      | -0.16                      | -0.35                                    | -0.01                                     | 0.81  | 0.93                                        | 0.01                                       | 0.59             | 0.33        | 1.28                     | 48.64                  | 2.37                       | 0.82         | 0.45       | 0.46            | 0.58               | 0.94             | 6.86         | 7                 | 1.53        | -0.24                                              | 3.98   | -0.1   | -0.24 | 0.49  | 0.88     | 0.65    | 4.73     |
| TA-AML4_AML40 | 0.5         | 0                          | -0.03                                                         | -0.14                                                     | -0.01                      | -0.14                                    | 0.41                                      | 0.35  | 0.75                                        | -0.28                                      | 1.09             | 1.69        | 6.32                     | 90.88                  | 0.53                       | 1.35         | 0.84       | 1.07            | 2.16               | 0.69             | 6.36         | 7.83              | 1.4         | -0.22                                              | 5.11   | -0.06  | -0.09 | 2.41  | 2.14     | 0.76    | -0.06    |
| TA-AML3_AML6  | 2.2         | 0.14                       | 0.15                                                          | -0.02                                                     | -0.03                      | -0.01                                    | 0.55                                      | 1.2   | 1.2                                         | 0.21                                       | 1.16             | 2.47        | 12.06                    | 170.37                 | 107.94                     | 1.33         | 0.84       | 1.31            | 1.02               | 1.64             | 7.45         | 6.68              | 1.29        | -0.1                                               | 3.18   | 0      | -0.07 | 2.24  | 1.76     | 0.67    | 0.4      |
| TA-AML2_AML31 | 0.49        | 0.21                       | 0.2                                                           | 0.18                                                      | 0.18                       | 0.17                                     | 0.22                                      | 0.58  | 0.67                                        | 0.27                                       | 0.5              | 0.61        | 0.43                     | 175.93                 | 0.43                       | 0.71         | 0.86       | 0.36            | 0.6                | 0.43             | 4.99         | 4.53              | 1.8         | -0.16                                              | 2.98   | 0      | -0.18 | 0.79  | 0.54     | 0.8     | 0.74     |
| TA-AML4_AML8  | 0.58        | 0.02                       | 0.05                                                          | -0.12                                                     | -0.07                      | -0.13                                    | 0.52                                      | 0.91  | 0.98                                        | -0.38                                      | 0.44             | 3.32        | 10.09                    | 59.9                   | 19.72                      | 0.9          | 0.48       | 0.66            | 1                  | 1.62             | 5.29         | 15.41             | 3.16        | -0.06                                              | 4.13   | -0.13  | 0.3   | 1.49  | 1.54     | 0.78    | 0.9      |
| TA-AML1_AML13 | 0.63        | 0.25                       | 0.18                                                          | 0.02                                                      | 0.88                       | 0                                        | 0.5                                       | 0.68  | 0.44                                        | 0                                          | 0.64             | 1.39        | 8.55                     | 97.98                  | 63.28                      | 0.34         | 0.24       | 0.06            | 0.75               | 0.59             | 4.43         | 6.38              | 7.37        | 0                                                  | 5.63   | -0.04  | 0     | 0.4   | 3.08     | 0.07    | 0        |
| TA-AML3_AML36 | 0.18        | -0.1                       | -0.11                                                         | -0.11                                                     | 0.4                        | -0.13                                    | 0.26                                      | 0.25  | 0.21                                        | -0.19                                      | 0.9              | 1.48        | 4.05                     | 60.41                  | 1.04                       | 0.44         | 0.46       | 0.13            | 0.42               | 0.39             | 3.85         | 3.44              | 0.43        | -0.31                                              | 4.32   | -0.22  | -0.08 | -0.13 | 0.75     | -0.11   | -0.26    |
| TA-AML2_AML33 | 0.99        | 0.36                       | 0.33                                                          | 0.29                                                      | 0.1                        | 0.36                                     | 0.37                                      | 0.6   | 1.33                                        | -0.15                                      | 0.91             | 1.68        | 5.88                     | 141.68                 | 1.88                       | 0.74         | 0.68       | 0.71            | 1.04               | 0.91             | 5.83         | 8.95              | 1.69        | 0.58                                               | 5.26   | -0.04  | 0.55  | -0.05 | 1.35     | 1.1     | 1.65     |
| TA-AML2_AML42 | 0.01        | 0.06                       | -0.14                                                         | -0.13                                                     | 0.62                       | -0.19                                    | 0.71                                      | 0.53  | 0.67                                        | -0.26                                      | 0.47             | 1.32        | 7.65                     | 72.56                  | 1.77                       | 0.18         | -0.05      | -0.04           | 0.16               | 0.25             | 3.52         | 4.12              | 1.45        | -0.12                                              | 2.51   | -0.11  | -0.11 | 1.88  | 1.29     | -0.06   | 0.02     |
| TA-AML4_AML14 | 0.53        | -0.17                      | -0.18                                                         | -0.18                                                     | 0.18                       | -0.23                                    | 0.24                                      | 0.32  | 0.48                                        | -0.12                                      | 1.41             | 6.56        | 14.25                    | 67.51                  | 37.05                      | 0.23         | -0.22      | -0.1            | 0.33               | 0.44             | 4.03         | 4.46              | 1.97        | -0.15                                              | 2.62   | -0.04  | -0.02 | 3.91  | 2.86     | 0.82    | 0.03     |
| TA-AML4_AML15 | 0.23        | -0.03                      | -0.07                                                         | -0.12                                                     | 0.38                       | -0.15                                    | 0.21                                      | 0.15  | 0.18                                        | -0.18                                      | 0.66             | 1.01        | 1.07                     | 40.17                  | 0.47                       | 1.05         | 0.95       | 0.29            | 0.51               | 0.73             | 5.3          | 8.17              | 3.18        | -0.3                                               | 2.77   | -0.15  | 0.04  | 3.12  | 0.43     | -0.15   | -0.05    |
| TA-AML2_AML22 | -0.2        | -0.35                      | -0.36                                                         | -0.34                                                     | -0.29                      | -0.34                                    | -0.36                                     | -0.32 | -0.29                                       | -0.3                                       | -0.29            | 0.37        | 1.2                      | 47.03                  | 0.83                       | 0.46         | 0.68       | 0.61            | 0.64               | 0.84             | 5.74         | 8.08              | 0.29        | -0.18                                              | 3.44   | 0.13   | -0.26 | 0.49  | 1.86     | 1.04    | 0.53     |
| TA-AML1_AML18 | 1.49        | 0.39                       | 0.35                                                          | 0.27                                                      | 0                          | 0.32                                     | 0.47                                      | 1.09  | 2.76                                        | -0.11                                      | 1.49             | 2.75        | 4.56                     | 159.14                 | 4.36                       | 1.89         | 1.32       | 0.72            | 0.86               | 1.01             | 5.58         | 7.2               | 2.43        | 0.11                                               | 12.2   | 0.2    | 0     | 0.2   | 2.63     | 1.64    | 1.51     |
| TA-AML3_AML4  | 0.59        | -0.09                      | -0.12                                                         | -0.16                                                     | 0.12                       | -0.21                                    | 0.21                                      | 0.24  | 1.32                                        | -0.31                                      | 0.74             | 0.91        | 2.09                     | 37.49                  | 1.37                       | 0.85         | 0.66       | 0.46            | 0.49               | 0.9              | 5.61         | 7.03              | 3.14        | -0.16                                              | 2.83   | 0.01   | 1.17  | 0.77  | 0.42     | 1.08    | 1.31     |
| TA-AML2_AML19 | 0.24        | 0.02                       | -0.05                                                         | -0.14                                                     | -0.01                      | -0.15                                    | 0.16                                      | 0.03  | 0.94                                        | -0.13                                      | 0.32             | 0.67        | 2.04                     | 172.03                 | 0.76                       | 0.39         | 1.05       | 0.45            | 2.82               | 0.29             | 4.46         | 6.01              | 1.04        | -0.23                                              | 2.77   | 0.19   | 0.75  | 2.3   | 0.55     | 0.55    | 1.15     |
| TA-AML2_AML29 | 0.42        | 0.14                       | 0.09                                                          | -0.12                                                     | 0.12                       | -0.14                                    | 0.3                                       | 0.51  | 0.79                                        | -0.06                                      | 0.7              | 1.59        | 3.25                     | 38.14                  | 0.65                       | 1.17         | 0.72       | 0.81            | 0.7                | 0.86             | 5.96         | 4.32              | 1.88        | -0.08                                              | 2.84   | 0.07   | 0.98  | -0.07 | 2.06     | 0.8     | 0.51     |
| TA-AML2_AML41 | 0.91        | -0.06                      | -0.09                                                         | -0.12                                                     | -0.05                      | -0.17                                    | 0.44                                      | 0.49  | 0.56                                        | -0.22                                      | 0.14             | 1.45        | 3.46                     | 46.37                  | 2.63                       | 1.35         | 0.76       | 0.98            | 1.07               | 0.53             | 4.22         | 8.64              | 3.61        | 0.27                                               | 2.83   | 0.16   | 0.75  | 0.34  | 1.96     | 0.15    | 0.21     |
| TA-AML4_AML25 | 3.5         | 0.5                        | -0.01                                                         | -0.06                                                     | 0.16                       | -0.14                                    | 11.17                                     | 0.84  | 0.77                                        | -0.2                                       | 1.17             | 5.99        | 10.8                     | 152.25                 | 76.43                      | 0.8          | 2.94       | 21.51           | 26.18              | 0.73             | 5.79         | 4.18              | 3.37        | -0.12                                              | 2.91   | -0.16  | -0.03 | 0.71  | 2.11     | 0.75    | -0.18    |
| TA-AML1_NI-1  | 0.9         | 0.5                        | 0.21                                                          | 0.1                                                       | 0.26                       | 0.1                                      | 0.68                                      | 1.04  | 2.38                                        | -0.16                                      | 0.49             | 2.52        | 6.56                     | 187.63                 | 5.29                       | 0.65         | 0.56       | 0.73            | 1.02               | 1.06             | 3.69         | 2.52              | 2.02        | 0.07                                               | 8.08   | 0      | 0.71  | 0.09  | 1.3      | 1.86    | 0.59     |
| TA-AML1_NI-3  | 0.99        | 0.49                       | 0.24                                                          | 0.21                                                      | 0.52                       | 0.03                                     | 1.03                                      | 0.7   | 1.44                                        | 0                                          | 0.51             | 2.36        | 7.87                     | 94.32                  | 18.64                      | 1            | 0.8        | 0.95            | 1.04               | 0.98             | 3.19         | 3.75              | 2.01        | -0.01                                              | 8.16   | 0      | 0.36  | 0.52  | 1.55     | 0.97    | 0.44     |
| TA-AML1_NI-5  | 1.11        | 0.76                       | 0.59                                                          | 0.63                                                      | 0.66                       | 0.59                                     | 0.82                                      | 0.84  | 2.08                                        | 0                                          | 0.75             | 2.1         | 6.86                     | 82.71                  | 14.58                      | 1.04         | 0.96       | 1.01            | 1.04               | 1.01             | 3.99         | 4.14              | 2.26        | 0.1                                                | 10.92  | 0      | 0.74  | 0.39  | 1.52     | 1.29    | 0.4      |
| TA-AML1_NI-6  | 1.04        | 0.22                       | 0.11                                                          | 0.09                                                      | 0.19                       | 0                                        | 0.22                                      | 0.79  | 1.79                                        | 0.21                                       | 0.63             | 2.32        | 8.17                     | 95.17                  | 6.36                       | 1            | 0.93       | 1               | 1.09               | 0.91             | 3.06         | 2.43              | 1.52        | 0                                                  | 9.83   | 0      | 0     | 0.23  | 1.88     | 1.54    | 0        |



**CD321 Median**

|               | Ungated | CD34+CD38 <sup>low</sup> | CD49b <sup>neg</sup> CD34 <sup>CD38<sup>low</sup></sup> | CD33 <sup>neg</sup> CD3 <sup>4</sup> | HSC-90hi33 <sup>neg</sup> | MPP-90 <sup>low</sup> 33 <sup>neg</sup> | CMP-CD34 <sup>CD38<sup>low</sup></sup> | GMP    | 34 <sup>neg</sup> CD38 <sup>+</sup> | 34 <sup>neg</sup> 38 <sup>neg</sup> | Myelo/Mon | ProMonocyte | CD14 <sup>neg</sup> | CD14 <sup>+</sup> | 11b+DR <sup>neg</sup> | ProMyelocyte | Myelocytes | Meta-myelocytes | Mature Granulocyte | Pro-erythroblast | Erythroblast | Late Erythroblast | Pre-B Cells | Mature B cells CD20+CD19 <sup>+</sup> | Plasma | T Cell | pDC    | mDC    | Basophil | NK Cell | Platelet       |       |        |
|---------------|---------|--------------------------|---------------------------------------------------------|--------------------------------------|---------------------------|-----------------------------------------|----------------------------------------|--------|-------------------------------------|-------------------------------------|-----------|-------------|---------------------|-------------------|-----------------------|--------------|------------|-----------------|--------------------|------------------|--------------|-------------------|-------------|---------------------------------------|--------|--------|--------|--------|----------|---------|----------------|-------|--------|
| TA-AML1_AML26 | 17.11   | 39.3                     | 32.5                                                    | 32.78                                | 45.08                     | 26.59                                   | 55.91                                  | 34.22  | 42.85                               | 10.95                               | 43.96     | 88.51       | 66.79               | 51.44             | 95.94                 | 33.17        | 21.82      | 8.54            | 7.33               | 5.55             | 12.55        | 8.62              | 41.3        | 1.12                                  | 1.91   | 11.33  | 112.53 | 20.93  | 75.05    | 9.73    | <b>1596.24</b> |       |        |
| TA-AML3_AML35 | 38.72   | 15.87                    | 15.41                                                   | 14.93                                | 18.61                     | 14.09                                   | 19.94                                  | 32.49  | 32.02                               | 3.65                                | 37        | 144.11      | 223.58              | 137.8             | 192.36                | 82.34        | 36.84      | 21.92           | 17.99              | 1.4              | 7.74         | 5.83              | 9.42        | 3.23                                  | 1.97   | 15.1   | 89.88  | 107.9  | 248.2    | 12.02   | 638.6          |       |        |
| TA-AML3_AML5  | 47.86   | 57.85                    | 56.09                                                   | 57.18                                | 56.91                     | 57.42                                   | 59.45                                  | 65.05  | 54.78                               | 33.35                               | 63.61     | 76.17       | 76.98               | 64.99             | 75.01                 | 85           | 39.74      | 32.73           | 36.29              | 12.52            | 14.63        | 8.53              | 5.73        | 2.99                                  | 0.86   | 17.51  | 93.03  | 11.52  | 135.34   | 19.54   | 363.44         |       |        |
| TA-AML4_AML10 | 61.97   | 68.65                    | 68.04                                                   | 62.12                                | 63.47                     | 61.54                                   | 72.21                                  | 53.26  | 25.61                               | 20.47                               | 65.32     | 77.07       | 88.25               | 79.55             | 73.02                 | 87.44        | 56.33      | 38.54           | 24.15              | 27.94            | 20.7         | 25.98             | 10.34       | 4.05                                  | 1.46   | 10.41  | 18.47  | 50.17  | 51.5     | 12.65   | <b>1249.29</b> |       |        |
| TA-AML4_AML32 | 72.41   | 83.87                    | 83.73                                                   | 85.46                                | 85.93                     | 85.38                                   | 81.21                                  | 77.84  | 8.48                                | 1.66                                | 84.64     | 80.16       | 101.75              | 86.58             | 79.85                 | 56.72        | 44.18      | 9.95            | 3.71               | 3.78             | 9.54         | 7.36              | 10.87       | 2.73                                  | 0.91   | 17.29  | 29.78  | 76.99  | 50.97    | 13.09   | 381.5          |       |        |
| TA-AML3_APL5  | 98.15   | 89.31                    | 80.71                                                   | 70.54                                | 68.05                     | 70.58                                   | 89.94                                  | 82.81  | 68.12                               | 35.54                               | 99.09     | 289.94      | 247.44              | 26.19             | 183.99                | 102.68       | 111.3      | 10.17           | 8.53               | 34.41            | 12.56        | 50.44             | 83.21       | 2.29                                  | 0.63   | 9.77   | 462.73 | 22.61  | 306.37   | 20.53   | X              |       |        |
| TA-AML3_APL3  | 23.26   | 51.84                    | 51.84                                                   | 53.81                                | 66.04                     | 49.38                                   | 47.41                                  | 36.69  | 50.71                               | 32.88                               | 66.78     | 24.83       | 31.66               | 32.63             | 97.39                 | 66.44        | 18.54      | 8.95            | 9.81               | 6.21             | 10.68        | 8.51              | 35.23       | 3.64                                  | 0.85   | 6.1    | 13.07  | 8.16   | 146.2    | 6.01    | 506.66         |       |        |
| TA-AML3_APL4  | 95.4    | 117.2                    | 101.49                                                  | 94.25                                | 86.14                     | 97.39                                   | 144.37                                 | 91.96  | 76.4                                | 60.33                               | 112.79    | 196.44      | 208.4               | 25.19             | 191.54                | 81.3         | 72.85      | 7.22            | 4.4                | 5.28             | 17.74        | 14.97             | 43.5        | 3.69                                  | 1.2    | 13.52  | 358.58 | 48.52  | 242.55   | 13.43   | 374.55         |       |        |
| TA-AML4_APL1  | 44.23   | 52                       | 51.1                                                    | 43.22                                | 52.46                     | 42.85                                   | 52.38                                  | 45.44  | 24.51                               | 6.13                                | 46.58     | 76.41       | 95.99               | 22.49             | 75.07                 | 49.16        | 16.8       | 5.6             | 5.33               | 68.48            | 11.17        | 9.2               | 31.33       | 3.18                                  | 0.65   | 10.38  | 131.75 | 38.8   | 114.17   | 12.37   | 861.43         |       |        |
| TA-AML1_AML27 | 166.08  | 216.65                   | 203.81                                                  | 153.85                               | 147.71                    | 155.5                                   | 220.23                                 | 152.02 | 130.95                              | 112.15                              | 163.64    | 268.3       | 361.66              | 4.8               | 59.95                 | 102.18       | 91.25      | 10.65           | 8.13               | 51.55            | 17.01        | 16.81             | 52.08       | 3.13                                  | 1.22   | 13.22  | 312.27 | 184.48 | 95.94    | 9.13    | <b>1249.57</b> |       |        |
| TA-AML3_AML7  | 32.19   | 101.99                   | 102.89                                                  | 101.67                               | 125.07                    | 92.64                                   | 109.5                                  | 36.25  | 27.73                               | 3.44                                | 28.29     | 45.63       | 46.56               | 26.83             | 68.24                 | 46.4         | 20.03      | 9.29            | 7.5                | 3.38             | 16.4         | 6.52              | 7.48        | 5.71                                  | 4.82   | 10.09  | 16.23  | 45.59  | 201.02   | 11.62   | X              |       |        |
| TA-AML3_AML9  | 25.13   | 147.1                    | 140                                                     | 124.08                               | 107.39                    | 126.07                                  | 150.13                                 | 100.88 | 32.88                               | 62.98                               | 115.5     | 43.7        | 21.31               | 21.34             | 15.9                  | 28.65        | 17.24      | 12.91           | 16.04              | 42.64            | 31.9         | 13.33             | 4.23        | 3.21                                  | 1.62   | 8.36   | 365.34 | 1.66   | 20.53    | 14.78   | <b>1556.04</b> |       |        |
| TA-AML2_AML20 | 17.35   | 66.43                    | 45.91                                                   | 46.29                                | 59.84                     | 45.33                                   | 46.16                                  | 13.03  | 13.67                               | 61.4                                | 21.7      | 16.65       | 6.78                | 5.18              | 64.02                 | 40.16        | 34.62      | 19.72           | 8.76               | 84.61            | 14.46        | 9.64              | 15.07       | 2.94                                  | 0.73   | 9.4    | 25.27  | 2.02   | 18.88    | 17.39   | 363.54         |       |        |
| TA-AML2_AML21 | 183.4   | 256.39                   | 248.11                                                  | 245.94                               | 232.4                     | 248.12                                  | 256.51                                 | 157.79 | 59.91                               | 42.21                               | 171.02    | 266.39      | 23.21               | 22.37             | 229.75                | 77.34        | 38.91      | 10.89           | 8.65               | 25.4             | 27.88        | 16.07             | 3.71        | 1.74                                  | 1      | 4.03   | 277.41 | 11.44  | 331.62   | 5.49    | 442.58         |       |        |
| TA-AML2_AML22 | 62.64   | 156.58                   | 154.24                                                  | 134.51                               | 128.85                    | 135.43                                  | 158.57                                 | 83.55  | 24.88                               | 18.03                               | 54.7      | 36.44       | 25.39               | 21.44             | 13.3                  | 55.16        | 17.27      | 5.46            | 8.64               | 15.82            | 14.8         | 9.37              | 16.47       | 3.38                                  | 0.46   | 13.55  | 151.04 | 21.37  | 61.23    | 18.23   | X              |       |        |
| TA-AML2_AML23 | 12.58   | 200.8                    | 173.08                                                  | 139.64                               | 115.21                    | 144.38                                  | 204.72                                 | 71.08  | 73.74                               | 71.01                               | 115.07    | 145.03      | 9.11                | 2.79              | 15.61                 | 37.32        | 23.14      | 17.61           | 8.01               | 39.59            | 19           | 12.81             | 30.35       | 2.66                                  | 1.17   | 9.67   | 252.98 | 4.85   | 67.07    | 8.46    | <b>1197.83</b> |       |        |
| TA-AML2_AML39 | 14.7    | 76.32                    | 75.5                                                    | 73.92                                | 91.37                     | 71.6                                    | 78.07                                  | 35.95  | 33.92                               | 7.36                                | 30.66     | 28.57       | 19.99               | 7.47              | 40.68                 | 42.92        | 27.63      | 13.88           | 15.12              | 14.35            | 20.57        | 9.55              | 35.46       | 2.01                                  | 1.64   | 7.59   | 35.69  | 5.67   | 21.31    | 11.02   | <b>1204.67</b> |       |        |
| TA-AML4_AML37 | 129.6   | 186.97                   | 186.02                                                  | 180.49                               | 177.38                    | 180.68                                  | 193.18                                 | 179.88 | 119.32                              | 109.45                              | 147.66    | 183.06      | 132.8               | 68.83             | 82.9                  | 127.65       | 39         | 19.43           | 19.97              | 84.95            | 21.86        | 30.32             | 23.57       | 3.05                                  | 1.96   | 10.87  | 158.81 | 197.75 | 66.64    | 28.24   | <b>1342.2</b>  |       |        |
| TA-AML4_AML38 | 60.14   | 228.39                   | 197.11                                                  | 92.25                                | 128.84                    | 91.6                                    | 232.7                                  | 82.06  | 61.16                               | 16.14                               | 133.43    | 259.2       | 112.93              | 86.72             | 79.31                 | 77.65        | 32.34      | 28.71           | 23.11              | 13.46            | 32.97        | 17.64             | 53.99       | 2.87                                  | 0.65   | 8.6    | 337.27 | 64.31  | 58.89    | 214.46  | 372.34         |       |        |
| TA-AML4_AML40 | 34.41   | 130.89                   | 126.76                                                  | 125.3                                | 95.9                      | 125.76                                  | 142.15                                 | 98.89  | 51.57                               | 29.28                               | 95.43     | 125.53      | 29.28               | 95.43             | 125.53                | 29.28        | 95.43      | 125.53          | 29.28              | 95.43            | 125.53       | 29.28             | 95.43       | 125.53                                | 29.28  | 95.43  | 125.53 | 29.28  | 95.43    | 125.53  | 29.28          | 95.43 | 125.53 |
| TA-AML3_AML6  | 70.72   | 143.87                   | 143.38                                                  | 146.2                                | 140.05                    | 146.48                                  | 118.86                                 | 109.22 | 100.5                               | 47.12                               | 103.29    | 14.25       | 12.34               | 7.53              | 10.01                 | 92.59        | 12.42      | 12.11           | 11.21              | 45.14            | 20.97        | 9.6               | 57.13       | 3.12                                  | 2.58   | 6.18   | 266.3  | 108.37 | 42.81    | 13.57   | 1007.55        |       |        |
| TA-AML2_AML31 | 141.64  | 193.51                   | 192.23                                                  | 183.93                               | 161.66                    | 186.8                                   | 194.75                                 | 149.21 | 99.68                               | 108.77                              | 144.94    | 178.33      | 30.83               | 75.35             | 64.37                 | 125.88       | 115.78     | 9.98            | 6.53               | 54.32            | 105.42       | 79.67             | 79.52       | 3.16                                  | 1.23   | 9.57   | 329.86 | 164.47 | 59.19    | 8.58    | 787.82         |       |        |
| TA-AML4_AML8  | 11.67   | 73.65                    | 70.82                                                   | 69.43                                | 78.72                     | 62.99                                   | 87.15                                  | 69.64  | 68.08                               | 45.74                               | 18.71     | 19.79       | 39.06               | 22.59             | 24.89                 | 73.63        | 22.81      | 6.97            | 5.26               | 5.48             | 7.5          | 5.46              | 15.2        | 15.64                                 | 2.22   | 7.25   | 25.99  | 4.82   | 33.29    | 14.53   | <b>1387.68</b> |       |        |
| TA-AML1_AML13 | 10.58   | 112.41                   | 113.57                                                  | 118.86                               | 132.49                    | 118.52                                  | 104.88                                 | 95.65  | 68.13                               | 34.78                               | 59.94     | 7.19        | 7.72                | 5.94              | 7.86                  | 30.05        | 14.85      | 6.87            | 9.7                | 10.52            | 12.57        | 11.39             | 6.27        | 4.16                                  | 3.43   | 9.35   | 14.88  | 1.21   | 52.34    | 11.97   | 1239.57        |       |        |
| TA-AML3_AML36 | 9.93    | 121.67                   | 122.46                                                  | 124                                  | 99.07                     | 126.7                                   | 93.49                                  | 102.26 | 63.57                               | 12.39                               | 110.68    | 84.54       | 64.45               | 38.27             | 45.15                 | 88.47        | 23         | 2.76            | 2.53               | 7.03             | 9.38         | 5.57              | 7.04        | 2.69                                  | 0.96   | 10.8   | 38.04  | 2.25   | 50       | 12.67   | 997.53         |       |        |
| TA-AML2_AML33 | 4.37    | 19.48                    | 18.91                                                   | 17.64                                | 19.64                     | 17.49                                   | 20.87                                  | 12.02  | 1.98                                | 0.71                                | 34.2      | 14.72       | 13.26               | 11.38             | 10.97                 | 13.53        | 8          | 1.8             | 1.33               | 5.95             | 8.66         | 6.57              | 2.22        | 2.19                                  | 0.02   | 4.97   | 10.15  | 12.4   | 13.54    | 2.97    | 480.8          |       |        |
| TA-AML2_AML42 | 11.07   | 54.07                    | 41.04                                                   | 38.75                                | 55.6                      | 33.32                                   | 151.99                                 | 70.57  | 29.61                               | 11.54                               | 39.59     | 34.64       | 42.83               | 40.73             | 33.66                 | 52.21        | 20.35      | 8.26            | 6.73               | 2.68             | 8.08         | 6.29              | 8.78        | 4.05                                  | 0.74   | 10.45  | 12.89  | 59.61  | 36.78    | 7.26    | 732.08         |       |        |
| TA-AML4_AML14 | 8.42    | 47.12                    | 46.88                                                   | 46.7                                 | 51.06                     | 45.68                                   | 52.32                                  | 57.65  | 1.94                                | 4.27                                | 9.45      | 14.28       | 12.43               | 20.01             | 22.59                 | 24.88        | 4.05       | 4.35            | 6.42               | 4.07             | 7.6          | 6.97              | 2.57        | 1.43                                  | 0.48   | 5.2    | 21.57  | 20.07  | 27.78    | 7.56    | 331.73         |       |        |
| TA-AML4_AML15 | 46.54   | 72.7                     | 69.58                                                   | 69.41                                | 74.33                     | 69.03                                   | 75.8                                   | 74.11  | 49.45                               | 36.86                               | 75.66     | 108.77      | 85.93               | 48.5              | 44.59                 | 83.51        | 98.13      | 2.37            | 2.34               | 6.12             | 13.97        | 14.24             | 2.53        | 3.83                                  | 1.27   | 13.72  | 84.24  | 27.04  | 36.69    | 14.53   | 705.19         |       |        |
| TA-AML2_AML22 | 3.2     | 1.58                     | 1.55                                                    | 1.99                                 | 4.65                      | 1.8                                     | 1.57                                   | 1.36   | 1                                   | 0.8                                 | 2.41      | 21.4        | 33.02               | 23.46             | 44.19                 | 39.13        | 28.82      | 11.55           | 9.27               | 8.1              | 7.16         | 5.56              | 4.12        | 2.51                                  | 0.41   | 6.16   | 3.9    | 7.57   | 27.26    | 8.47    | <b>1299.67</b> |       |        |
| TA-AML1_AML18 | 51.06   | 21.68                    | 19.46                                                   | 11.24                                | 22.07                     | 8.56                                    | 28.19                                  | 53.7   | 10.51                               | 2.42                                | 58.92     | 74.52       | 21.71               | 19.55             | 14.57                 | 56.72        | 24.97      | 2.95            | 2.27               | 20.18            | 21.52        | 14.2              | 5.25        | 3.85                                  | 3.56   | 9.68   | 9.68   | 8.42   | 24.45    | 7.26    | <b>1615.85</b> |       |        |
| TA-AML3_AML4  | 20.73   | 60.52                    | 58.64                                                   | 58.24                                | 61.76                     | 56.84                                   | 65.76                                  | 24.31  | 3.71                                | 2.53                                | 16.06     | 13.37       | 20.01               | 30.39             | 22.16                 | 27.32        | 21.67      | 9.33            | 5.25               | 18.1             | 27.37        | 30.56             | 13.74       | 2.11                                  | 1.46   | 10.39  | 16.51  | 23.78  | 27.61    | 12.86   | <b>631.23</b>  |       |        |
| TA-AML2_AML19 | 40.77   | 45.37                    | 42.3                                                    | 43.26                                | 41.63                     | 43.55                                   | 45.47                                  | 48.62  | 15.07                               | 17.15                               | 43.95     | 64.07       | 63.63               | 49.01             | 84.49                 | 33.57        | 39.02      | 18.94           | 6.77               | 6.22             | 12.89        | 15.36             | 2.83        | 6.21                                  | 0.85   | 9.17   | 33.17  | 15.82  | 47.36    | 10.25   | <b>1399.65</b> |       |        |
| TA-AML2_AML29 | 133     |                          |                                                         |                                      |                           |                                         |                                        |        |                                     |                                     |           |             |                     |                   |                       |              |            |                 |                    |                  |              |                   |             |                                       |        |        |        |        |          |         |                |       |        |

|               | CD99 Median |              |              |                     |               |                |                         |         |                 |                 |           |             |          |           |           |              |            |                |                    |                  |              |                   |             |                           |        |         |         |        |          |         |          |        |
|---------------|-------------|--------------|--------------|---------------------|---------------|----------------|-------------------------|---------|-----------------|-----------------|-----------|-------------|----------|-----------|-----------|--------------|------------|----------------|--------------------|------------------|--------------|-------------------|-------------|---------------------------|--------|---------|---------|--------|----------|---------|----------|--------|
|               | Ungated     | CD34+CD38low | CD54+CD38low | CD33negCD34+CD38low | HSC-90hi13neg | MPP-90low33neg | CMP-CD34+CD38lowCD33mid | GMP     | 34negCD38+Undif | 34neg38negUndif | Myelo/Mon | ProMonocyte | CD14Mono | CD14+Mono | 11b+DRneg | ProMyelocyte | Myelocytes | Meta-myelocyte | Mature Granulocyte | Pro-erythroblast | Erythroblast | Late Erythroblast | Pre-B Cells | Mature B cells CD20+CD19+ | Plasma | T Cell  | pDC     | mDC    | Basophil | NK Cell | Platelet |        |
| TA-AML1_AML26 | 2.14        | 32.8         | 26.74        | 27.05               | 39.86         | 21.55          | 46.23                   | 41.72   | 3.79            | 1.41            | 32.02     | 21.65       | 18.56    | 10.27     | 6.34      | 1.51         | 1.06       | 0.45           | 2.02               | 1.44             | 1.66         | 1.36              | 5.46        | 4.57                      | 2.5    | 23.44   | 54.29   | 5.69   | 11.71    | 22.2    | 86.37    |        |
| TA-AML3_AML35 | 10.09       | 37.13        | 37.57        | 36.1                | 48.86         | 33.71          | 40.59                   | 78.16   | 10.43           | 3.15            | 62.81     | 64.57       | 42.11    | 30.12     | 23.5      | 3.28         | 1.79       | 1.08           | 1.06               | 3.28             | 3.28         | 45.21             | 19.08       | 30.59                     | 17.3   | 98.05   | 23.36   | 112.51 | 182.53   | 1622.89 |          |        |
| TA-AML3_AML5  | 924.79      | 1878.22      | 1800.99      | 1813.2              | 1972.04       | 1736.55        | 2136.19                 | 2084.54 | 17.21           | 7.38            | 1844.03   | 1719.58     | 1397     | 1135.06   | 16.91     | 2076.08      | 7.48       | 8.46           | 9.12               | 304.29           | 30.32        | 15.17             | 524.12      | 76.34                     | 366.94 | 297.59  | 1115.45 | 48.29  | 641.51   | 402.36  | 377.22   |        |
| TA-AML3_AML10 | 663.81      | 915.06       | 907.77       | 854.32              | 944.89        | 819.26         | 951.01                  | 714.75  | 215.65          | 107.18          | 793.4     | 764.17      | 693.19   | 389.29    | 143.74    | 49.66        | 10.15      | 8.47           | 7.66               | 599.72           | 47.08        | 125.27            | 290.13      | 57.44                     | 135.02 | 250.97  | 503.24  | 190.11 | 207.7    | 352.52  | 410.6    |        |
| TA-AML2_AML22 | 2294.2      | 2691.52      | 2683.36      | 2646.34             | 2977.01       | 2580.14        | 2793.32                 | 2614.93 | 508.8           | 50.35           | 2598.13   | 887.34      | 743.19   | 579.21    | 369.2     | 300.12       | 19.47      | 4.72           | 2.64               | 85.33            | 52.32        | 53.8              | 434.85      | 133.72                    | 326.02 | 565.12  | 1942.19 | 789.37 | 217.86   | 500.71  | 3087.97  |        |
| TA-AML3_APL3  | 727.11      | 1189.55      | 1127.29      | 790.81              | 432.12        | 834.85         | 1198.08                 | 1017.54 | 163.89          | 68.82           | 708.73    | 1494.03     | 1332.43  | 66.02     | 1030.71   | 768.31       | 731.7      | 2.63           | 2.08               | 381.65           | 31.73        | 265.77            | 198.14      | 41.03                     | 140.03 | 225.26  | 1115.3  | 22.8   | 1335.93  | 346.27  | X        |        |
| TA-AML3_APL4  | 88.01       | 237.21       | 228.09       | 147.67              | 132.28        | 149.32         | 765.97                  | 366.14  | 178.83          | 62.25           | 212.66    | 93.42       | 61.31    | 54.13     | 115.8     | 75.69        | 3.05       | 1.91           | 2.23               | 45.73            | 21.79        | 16.16             | 142.94      | 39.29                     | 118.71 | 177.83  | 284.72  | 13.18  | 144.3    | 167.32  | 270.23   |        |
| TA-AML2_APL4  | 480.82      | 991.54       | 472.89       | 354.54              | 202.78        | 367.11         | 1313.23                 | 1178.07 | 391.65          | 259.52          | 602.98    | 1426.96     | 1392.15  | 291.98    | 926.58    | 353.93       | 305.65     | 0.74           | 0.46               | 42.62            | 29.04        | 22.14             | 220.19      | 46.91                     | 77.88  | 346.34  | 1988.72 | 17.59  | 1261.08  | 288.61  | 379.35   |        |
| TA-AML4_APL1  | 678.73      | 1193.75      | 1180.7       | 325.11              | 174.9         | 389.17         | 220.65                  | 841.68  | 207.83          | 19.73           | 734.43    | 1142.39     | 991.43   | 52.5      | 421.57    | 750.17       | 3.57       | 1.22           | 1.12               | 365.12           | 35.14        | 49.54             | 382.45      | 70.52                     | 101.85 | 403.85  | 1292.4  | 27.61  | 708.39   | 328.4   | 373.98   |        |
| TA-AML1_AML27 | 267.65      | 602.39       | 549.34       | 418.11              | 438.8         | 412.33         | 615.37                  | 278.62  | 160.63          | 163.93          | 243.49    | 692.64      | 960.65   | 160.52    | 56.62     | 46.64        | 123.38     | 1.99           | 1.03               | 71.15            | 13.58        | 13.4              | 64.44       | 54.91                     | 86.99  | 217.81  | 583.18  | 327.76 | 148.33   | 277.27  | 301.42   |        |
| TA-AML3_AML7  | 539.53      | 1129.71      | 1051.99      | 287.14              | 363.47        | 282.27         | 1781.11                 | 299.89  | 18.06           | 12.19           | 239.78    | 642.61      | 740.31   | 598.81    | 301.05    | 7.98         | 5.78       | 4.94           | 4.99               | 99.65            | 80.26        | 38.8              | 49.34       | 86.14                     | 169.79 | 200.86  | 582.5   | 433.05 | 542.89   | 409.46  | X        |        |
| TA-AML3_AML9  | 35.69       | 878.25       | 855.9        | 768.87              | 771.97        | 768.11         | 894.92                  | 704.25  | 156.78          | 38.48           | 583.91    | 259.51      | 210.77   | 236.29    | 5.97      | 5.92         | 5.83       | 5.84           | 9.18               | 86.42            | 100.63       | 43.57             | 278.43      | 77.6                      | 155.02 | 333.59  | 1057.99 | 156.67 | 333.83   | 433.65  | 208.39   |        |
| TA-AML2_AML20 | 577.35      | 650.81       | 640.77       | 482.48              | 333.59        | 514.9          | 744.42                  | 751.71  | 314.23          | 137.95          | 730.66    | 361.88      | 434.67   | 508.48    | 50.76     | 134.6        | 14.58      | 9.75           | 6.94               | 737.79           | 14.56        | 43.19             | 415.83      | 121.18                    | 396.22 | 360.12  | 585.05  | 54.95  | 100.43   | 568.29  | 684.04   |        |
| TA-AML2_AML21 | 1044.68     | 1315.67      | 1275.36      | 1126.93             | 1251.06       | 1114.51        | 1325.92                 | 405.66  | 91.33           | 963.83          | 1364.09   | 343.43      | 186.17   | 988.32    | 98.88     | 7.82         | 2.51       | 2.23           | 59.58              | 82.49            | 52.25        | 39.82             | 72.45       | 366.39                    | 421.63 | 1179.53 | 31.88   | 936.05 | 343.26   | 88.59   |          |        |
| TA-AML2_AML22 | 893.21      | 1599.82      | 1582.18      | 1367.01             | 1545.76       | 1343.94        | 1624.09                 | 883.94  | 188.29          | 93.53           | 842.03    | 326.89      | 324.08   | 294.86    | 13.04     | 667.82       | 7.12       | 2.22           | 2.39               | 58.35            | 32.37        | 24.95             | 221.7       | 77.59                     | 158.79 | 452.55  | 1126.54 | 37.65  | 101.6    | 489.79  | X        |        |
| TA-AML2_AML23 | 179.24      | 1355.07      | 1332.76      | 982.39              | 1001.89       | 980.89         | 1376.09                 | 854.29  | 451.12          | 368.49          | 820.43    | 358.55      | 143.44   | 6.87      | 4.82      | 4.11         | 2.79       | 3.07           | 49.34              | 33.94            | 17.23        | 87.01             | 54.35       | 283.22                    | 318.86 | 1186.42 | 14.78   | 50.13  | 419.58   | 149.68  |          |        |
| TA-AML2_AML39 | 112.84      | 495.94       | 404.77       | 106.39              | 107.49        | 104.22         | 571.82                  | 268.46  | 5.58            | 3.98            | 78.34     | 233.7       | 265.42   | 173.40    | 6.76      | 6.17         | 5.3        | 3.88           | 4.16               | 96.68            | 10.6         | 6.65              | 8.2         | 33.98                     | 88.94  | 223.85  | 195.31  | 25.41  | 81.63    | 275.25  | 328.12   |        |
| TA-AML4_AML37 | 2136.11     | 2871.05      | 2836.17      | 2607.76             | 3033.61       | 2572.72        | 3094.23                 | 2519.93 | 1775.19         | 1841.48         | 2514.02   | 2998.17     | 1747.05  | 110.19    | 638.35    | 2390.43      | 22.13      | 15.43          | 792.59             | 121.78           | 328.18       | 211.92            | 75.04       | 180.72                    | 240.34 | 1769.56 | 3531.14 | 10.13  | 105.22   | 327.4   |          |        |
| TA-AML4_AML38 | 175.88      | 1163.57      | 906.56       | 543.61              | 300.09        | 547.07         | 1183.09                 | 472.33  | 170.25          | 14.7            | 519.87    | 1230.61     | 476.53   | 344.2     | 15.13     | 13.62        | 12.89      | 13.14          | 16.9               | 7.88             | 87.46        | 54.25             | 242.11      | 81.86                     | 114.02 | 205.12  | 1000.67 | 33.37  | 93.93    | 1077.08 | 106.2    |        |
| TA-AML4_AML40 | 251.13      | 1042.83      | 1006.19      | 981.9               | 924.89        | 984.73         | 1175.81                 | 849.6   | 168.26          | 39.43           | 278.76    | 849.76      | 364.29   | 26.7      | 21.03     | 19.73        | 7.51       | 8.18           | 10.65              | 129.61           | 77.06        | 46.53             | 198.67      | 210.35                    | 347.54 | 368.33  | 233.19  | 71.98  | 430.27   | 197.87  |          |        |
| TA-AML3_AML6  | 618.95      | 906.76       | 905.18       | 882.42              | 781.11        | 889.33         | 935.25                  | 791.59  | 688.14          | 25.02           | 724.49    | 420.39      | 475.01   | 501.14    | 396.23    | 653.09       | 5.01       | 5.79           | 6.39               | 446.2            | 58.1         | 29.78             | 663.99      | 85.88                     | 445.43 | 375.92  | 1235.57 | 763.43 | 257.7    | 459.31  | 199.6    |        |
| TA-AML2_AML31 | 667.9       | 965.89       | 958.39       | 862.41              | 899.14        | 856.93         | 983.83                  | 860.78  | 423.58          | 534.1           | 680.99    | 953.78      | 362.29   | 196.62    | 102.95    | 674.57       | 557.51     | 2.01           | 0.82               | 97.2             | 525.72       | 358.9             | 465.67      | 83.24                     | 139.55 | 291.02  | 1087.87 | 836.82 | 94.74    | 308.22  | 230.06   |        |
| TA-AML4_AML8  | 143.88      | 531.1        | 510.49       | 437.42              | 493.65        | 405.32         | 611.26                  | 464.57  | 34.22           | 16.05           | 139.86    | 201.21      | 309.4    | 341.91    | 22.57     | 4.38         | 3.16       | 2.35           | 3.12               | 96.64            | 23.21        | 5.89              | 23.75       | 233.12                    | 81.42  | 273.3   | 362.38  | 11.83  | 121.53   | 468.61  | 384.34   |        |
| TA-AML1_AML13 | 72.1        | 793.36       | 811.63       | 792.05              | 784.36        | 792.6          | 815.97                  | 792.73  | 712.41          | 357.7           | 255.37    | 132.95      | 187.85   | 169.89    | 133.26    | 2.08         | 1.82       | 1.54           | 2.43               | 14.04            | 12.29        | 20.51             | 177.41      | 98.61                     | 159.19 | 274.96  | 122.53  | 7.64   | 40.05    | 308.62  | 171.99   |        |
| TA-AML3_AML36 | 66.26       | 1008.19      | 1013.68      | 1035.4              | 723.47        | 1043.44        | 568.37                  | 484.88  | 63.18           | 21.94           | 144.89    | 242.74      | 285.77   | 207.42    | 64.33     | 8.08         | 5.98       | 2.53           | 2.63               | 37.54            | 16.21        | 14.66             | 319.19      | 57.22                     | 132.58 | 247.86  | 102.3   | 7.41   | 83.13    | 301.21  | 49.41    |        |
| TA-AML3_AML33 | 5.93        | 511.72       | 492.27       | 444.08              | 517.5         | 400.84         | 561.25                  | 619.41  | 42.95           | 2.77            | 801.35    | 539.53      | 213      | 43.81     | 11.98     | 1.76         | 1.22       | 0.29           | 0.02               | 76.14            | 6.51         | 5.27              | 7.96        | 37.55                     | 30.4   | 259.8   | 337.8   | 18.51  | 23.07    | 201.67  | 176.01   |        |
| TA-AML2_AML2  | 5           | 15.8         | 523.77       | 222.64              | 189.3         | 109.75         | 221.99                  | 1228.21 | 175.01          | 87.04           | 55.53     | 113.47      | 175.15   | 234.64    | 208.73    | 19.5         | 2.97       | 1.78           | 0.88               | 1.03             | 4.63         | 5.9               | 4.84        | 36.72                     | 55.07  | 105.64  | 141.72  | 130.35 | 1146.12  | 46.18   | 189.91   | 205.21 |
| TA-AML4_AML4  | 182.11      | 537.68       | 535.74       | 535.45              | 552.27        | 531.58         | 578.34                  | 621.86  | 200.27          | 30.28           | 178.61    | 362.92      | 143.79   | 307.11    | 249.87    | 3.64         | 0.79       | 0.91           | 1.91               | 40.23            | 33.01        | 28.66             | 21.24       | 44.39                     | 103.25 | 367.65  | 252.96  | 30.13  | 37.93    | 265.58  | 94.15    |        |
| TA-AML4_AML15 | 283.06      | 579.48       | 578.89       | 604.52              | 952.17        | 578.57         | 569.31                  | 480.55  | 167.1           | 97.14           | 448.28    | 886.02      | 751.03   | 352.27    | 329.7     | 357.6        | 679.9      | 2.76           | 2.79               | 54.61            | 30.52        | 42.52             | 290.58      | 91.59                     | 182.63 | 265.37  | 157.28  | 36     | 58.46    | 351.33  | 69.35    |        |
| TA-AML2_AML22 | 165.93      | 114.85       | 114.73       | 187.46              | 205.33        | 187.02         | 109.52                  | 195.08  | 147.76          | 58.45           | 194.45    | 442.1       | 479.07   | 245.42    | 4.35      | 6.19         | 3.5        | 1.7            | 1.49               | 85.37            | 52.8         | 39.71             | 163.25      | 79.59                     | 69.87  | 259.09  | 143.89  | 23.35  | 23.28    | 402.42  | 255.84   |        |
| TA-AML1_AML18 | 1707.18     | 962.03       | 931.78       | 524.18              | 747.82        | 464.7          | 1130.95                 | 1337.91 | 149.36          | 21.12           | 1860.44   | 2444.79     | 236.1    | 135.43    | 47.98     | 1819.25      | 6.75       | 1.82           | 1.99               | 144.5            | 57.64        | 25.82             | 30.73       | 74.91                     | 52.68  | 410.63  | 1603.62 | 55.93  | 55.77    | 203.42  | 275.11   |        |
| TA-AML3_AML4  | 64.22       | 764.35       | 752.27       | 765.89              | 756.24        | 769.5          | 752.13                  | 581.74  | 128.51          | 4.21            | 307.95    | 383.37      | 483.41   | 385.13    | 34.23     | 3.84         | 3.57       | 3.64           | 3.58               | 18.68            | 11.54        | 11.48             | 110.33      | 70.44                     | 128.14 | 422.79  | 439.53  | 26.88  |          |         |          |        |

|               | CD13 Median | CD34+CD38 <sup>low</sup> | CD49b <sup>+</sup> CD38 <sup>high</sup> | CD33 <sup>neg</sup> CD34 <sup>+</sup> CD38 <sup>low</sup> | HSC-90hi13 <sup>neg</sup> | MPP-90 <sup>low</sup> 33 <sup>neg</sup> | CD34 <sup>+</sup> CD38 <sup>mid</sup> | GMP   | 34 <sup>neg</sup> CD38 <sup>+</sup> | 34 <sup>neg</sup> 38 <sup>neg</sup> | Myelo/Mon | ProMono | CD14 <sup>neg</sup> Mono | CD14 <sup>+</sup> Mono | 11b+DR <sup>neg</sup> Mono | ProMyelocyte | Myelocytes | Meta-myelocytes | Mature Granulocytes | Pro-erythroblast | Erythroblast | Late Erythroblast | Pre-B Cells | Mature B cells CD20+CD19 <sup>+</sup> | Plasma | T Cell | pDC  | mDC   | Basophil | NK Cell | Platelet |
|---------------|-------------|--------------------------|-----------------------------------------|-----------------------------------------------------------|---------------------------|-----------------------------------------|---------------------------------------|-------|-------------------------------------|-------------------------------------|-----------|---------|--------------------------|------------------------|----------------------------|--------------|------------|-----------------|---------------------|------------------|--------------|-------------------|-------------|---------------------------------------|--------|--------|------|-------|----------|---------|----------|
| TA-AML1_AML26 | 0           | 0.85                     | 0.64                                    | 0.65                                                      | 1.08                      | 0.41                                    | 1.33                                  | 0.72  | 0.12                                | -0.07                               | 1.2       | 2.55    | 2.02                     | 1.02                   | 1.92                       | -0.05        | -0.1       | -0.07           | 0.3                 | -0.31            | -0.13        | -0.2              | 0.7         | 0.1                                   | 0      | 1.75   | 2.44 | 5.31  | 4.48     | 0.89    | 1.75     |
| TA-AML3_AML35 | 0.54        | 0.34                     | 0.32                                    | 0.3                                                       | 0.61                      | 0.22                                    | 0.54                                  | 0.63  | 0.64                                | -0.14                               | 0.98      | 6.09    | 14.18                    | 9.92                   | 12.95                      | 0.27         | 0.18       | 0.44            | 1.71                | -0.05            | -0.3         | -0.25             | 2.14        | 0.69                                  | 0.36   | 3.58   | 1.66 | 14.42 | 11.36    | 2.25    | 3.56     |
| TA-AML3_AML5  | 4.94        | 5.95                     | 5.61                                    | 5.62                                                      | 6.7                       | 4.99                                    | 7.1                                   | 5.82  | 0.79                                | 0.33                                | 4.5       | 6.12    | 5.86                     | 7.89                   | 1.71                       | 5.01         | 0.91       | 2.28            | 5.96                | 2.63             | 0.54         | 0.25              | 2.88        | 1.54                                  | 0.48   | 3.7    | 5.25 | 7.08  | 4.93     | 3.97    | 2.9      |
| TA-AML1_AML10 | 7.97        | 8.69                     | 8.55                                    | 8.17                                                      | 9.52                      | 7.61                                    | 9.12                                  | 7.34  | 4.14                                | 3.41                                | 7.85      | 8.33    | 7.45                     | 9.58                   | 12.41                      | 6.93         | 3.11       | 5.05            | 7.56                | 3.41             | 1.01         | 4.41              | 2.96        | 1.49                                  | 0.18   | 4.3    | 3.65 | 5.24  | 10.5     | 3.68    | 2.81     |
| TA-AML2_AML32 | 7.99        | 9.07                     | 9.07                                    | 9.58                                                      | 9.1                       | 9.69                                    | 8.32                                  | 9.38  | 2.07                                | 0.94                                | 8.28      | 8.35    | 9.4                      | 13.64                  | 82.76                      | 4.58         | 2.33       | 0.81            | 0.82                | 0.03             | 0.45         | 1.12              | 3.97        | 1.84                                  | 0.34   | 4.28   | 6.56 | 8.83  | 28.23    | 3.21    | 75.86    |
| TA-AML3_APL5  | 7.4         | 5.93                     | 5.72                                    | 4.28                                                      | 3.42                      | 4.44                                    | 5.98                                  | 4.64  | 7.35                                | 7.59                                | 7.68      | 7.42    | 6.5                      | 5.62                   | 9.42                       | 8.97         | 5.87       | 0.76            | 1.2                 | 2.6              | 0.6          | 5.32              | 6.34        | 1                                     | 0.09   | 3.3    | 6.31 | 4.13  | 9.37     | 3.59    | X        |
| TA-AML3_APL3  | 5.44        | 5.75                     | 5.59                                    | 4.83                                                      | 4.17                      | 4.93                                    | 7.13                                  | 5.27  | 10.9                                | 10.24                               | 13.82     | 5.65    | 8.79                     | 15.76                  | 14.82                      | 8.29         | 0.45       | 1.12            | 2.15                | -0.02            | 0.37         | 0.41              | 7.99        | 1.13                                  | 0.31   | 3.08   | 7.65 | 13.83 | 22.44    | 2.49    | 4.23     |
| TA-AML2_APL4  | 5.7         | 4.38                     | 3.55                                    | 3.26                                                      | 4.15                      | 3.16                                    | 6.29                                  | 4.9   | 5.79                                | 5.09                                | 6.42      | 5.01    | 4.99                     | 2.93                   | 9.32                       | 6.12         | 4.09       | 0.54            | 0.41                | 0.62             | 0.76         | 0.58              | 7.06        | 0.98                                  | 0.11   | 3.6    | 6.57 | 1.84  | 7.3      | 2.68    | 25.43    |
| TA-AML4_APL1  | 6.07        | 5.37                     | 5.34                                    | 4.63                                                      | 4.7                       | 4.46                                    | 5.39                                  | 4.35  | 2.33                                | 4.09                                | 6.26      | 8       | 8.77                     | 17.36                  | 14.98                      | 6.71         | 0.44       | 0.84            | 1.07                | 7.35             | 0.46         | 1.45              | 7.83        | 1.6                                   | 0.23   | 4.42   | 5.84 | 8.46  | 15.82    | 3.26    | 2.18     |
| TA-AML1_AML27 | 3.56        | 4.7                      | 4.36                                    | 3.43                                                      | 5.08                      | 3.3                                     | 4.78                                  | 3.17  | 2.8                                 | 3.54                                | 3.31      | 5.65    | 5.12                     | 2.01                   | 6.34                       | 7.45         | 2.03       | 1.07            | 2.29                | 0.78             | 0.03         | 0.56              | 2.84        | 1.47                                  | 0      | 4.04   | 3.67 | 6.11  | 9.64     | 2.66    | 1.22     |
| TA-AML3_AML7  | 7.03        | 5.61                     | 5.29                                    | 3.49                                                      | 4.02                      | 3.29                                    | 7.25                                  | 1.79  | 2.39                                | 0.46                                | 3.35      | 5.29    | 8.65                     | 7.71                   | 21.11                      | 3.8          | 1.58       | 3.52            | 4.93                | -0.04            | 1.22         | 0.75              | 2.52        | 1.81                                  | 0.82   | 3.09   | 1.8  | 7.91  | 39.45    | 3.16    | X        |
| TA-AML3_AML9  | 2.25        | 5.96                     | 5.88                                    | 5.05                                                      | 3.61                      | 4.92                                    | 6.12                                  | 4.72  | 1.66                                | 1.55                                | 4.23      | 3.47    | 1.79                     | 2.22                   | 0.37                       | 0.45         | 0.72       | 0.81            | 2.27                | 1                | 0.99         | 0.96              | 2.89        | 1.55                                  | 0.34   | 3.76   | 2.02 | 6.59  | 6.03     | 4       | 2.14     |
| TA-AML2_AML20 | 2.47        | 3.16                     | 2.75                                    | 2.61                                                      | 3.51                      | 2.53                                    | 3.49                                  | 2.51  | 2.03                                | 2.04                                | 2.69      | 2.42    | 2.49                     | 2.74                   | 3.08                       | 2.89         | 1.44       | 1.06            | 2.98                | 1.88             | 0.6          | 1.11              | 3.43        | 1.8                                   | 0.26   | 3.37   | 1.42 | 2.63  | 0.96     | 3.22    | 4.03     |
| TA-AML2_AML21 | 4.11        | 4.64                     | 4.54                                    | 3.79                                                      | 4.4                       | 3.72                                    | 4.69                                  | 3.9   | 2.16                                | 1.75                                | 4.08      | 5.48    | 4.97                     | 10.35                  | 5.49                       | 3.24         | 0.85       | 0.55            | 1.31                | 0.34             | 0.66         | 1.13              | 0.73        | 0.88                                  | 0.64   | 3.87   | 3.78 | 15.7  | 6.32     | 2.63    | 4        |
| TA-AML2_AML23 | 5.23        | 8.24                     | 8.19                                    | 8.24                                                      | 9.38                      | 8.08                                    | 8.23                                  | 6.07  | 1.96                                | 1.52                                | 4.76      | 6.49    | 12.15                    | 22.44                  | 4.77                       | 4.73         | 2.29       | 3.27            | 2.75                | 0.17             | 0.21         | 0.61              | 4.77        | 1.49                                  | -0.06  | 3.86   | 3.27 | 12.39 | 15.07    | 3.48    | X        |
| TA-AML2_AML30 | 2.65        | 5.22                     | 4.99                                    | 4.06                                                      | 3.88                      | 4.08                                    | 5.3                                   | 3.2   | 3.44                                | 2.65                                | 3.87      | 4.02    | 2.38                     | 1.84                   | 1.4                        | 0.86         | 0.54       | 0.72            | 1.15                | 0.71             | 0.44         | 0.35              | 4.77        | 1.09                                  | 0.4    | 3.25   | 3.24 | 2.99  | 8.07     | 2.56    | 1.47     |
| TA-AML2_AML39 | 5.14        | 4.8                      | 4.16                                    | 3.14                                                      | 4.83                      | 2.88                                    | 4.97                                  | 2.76  | 4.72                                | 1.48                                | 4.8       | 5.77    | 6.62                     | 6.25                   | 5.5                        | 3.31         | 2.69       | 3.03            | 3.75                | 2.15             | 0.17         | 0.5               | 6.92        | 0.97                                  | 0.18   | 3.21   | 2.35 | 3.56  | 22.3     | 3.32    | 1.45     |
| TA-AML4_AML37 | 9.16        | 12.33                    | 12.54                                   | 13.1                                                      | 11.47                     | 13.24                                   | 11.9                                  | 13.87 | 8.51                                | 7.99                                | 9.97      | 10.42   | 9.27                     | 11.8                   | 7.19                       | 7.77         | 5.46       | 12.36           | 8.09                | 2.44             | 0.93         | 2.67              | 7.44        | 1.49                                  | 0.48   | 3.52   | 7.97 | 11.81 | 6.41     | 6.45    | 1.35     |
| TA-AML4_AML38 | 3.25        | 6.4                      | 5.92                                    | 5.76                                                      | 4.27                      | 5.78                                    | 6.45                                  | 6.07  | 2.82                                | 0.82                                | 5.34      | 7.6     | 2.98                     | 2.72                   | 8.28                       | 4.05         | 3.49       | 10.19           | 11                  | -0.22            | 1.07         | 1.22              | 6.09        | 1.48                                  | 0.16   | 3.2    | 4.37 | 9.14  | 23.29    | 7.34    | 0.81     |
| TA-AML4_AML40 | 2.88        | 5.11                     | 4.77                                    | 4.36                                                      | 7.01                      | 4.03                                    | 6.44                                  | 4.62  | 1.5                                 | 1.01                                | 3.6       | 7.14    | 10.3                     | 17.28                  | 6.86                       | 38.36        | 2.65       | 5.69            | 8.46                | 0.92             | 1.14         | 0.45              | 2.23        | 1.45                                  | 0.33   | 3.49   | 4.44 | 7.79  | 11.82    | 2.87    | 2.2      |
| TA-AML3_AML6  | 14.46       | 7.1                      | 7.07                                    | 6.51                                                      | 7.51                      | 6.42                                    | 9.02                                  | 24.51 | 20.37                               | 6.11                                | 22.31     | 6.69    | 5.68                     | 5.91                   | 6.08                       | 17.22        | 4.03       | 4.88            | 3.7                 | 8.51             | 1.06         | 0.46              | 11.55       | 1.82                                  | 0.73   | 4.26   | 4.3  | 25.93 | 6.82     | 4.35    | 2.94     |
| TA-AML2_AML31 | 3.8         | 4.6                      | 4.56                                    | 3.84                                                      | 3.92                      | 3.83                                    | 4.74                                  | 3.29  | 3.08                                | 3.95                                | 3.83      | 5.12    | 4.25                     | 4.63                   | 4.87                       | 4.01         | 3.51       | 0.47            | 0.89                | 1.21             | 2.14         | 1.19              | 3.79        | 1.27                                  | 0.02   | 3.17   | 3.57 | 6.53  | 6.6      | 2.38    | 2.64     |
| TA-AML4_AML8  | 3.1         | 7.47                     | 7.52                                    | 7.45                                                      | 6.95                      | 7.55                                    | 7.44                                  | 5.45  | 1.75                                | 0.41                                | 1.99      | 4.53    | 6.15                     | 10.06                  | 6.92                       | 0.57         | 0.51       | 1.98            | 6.26                | 0.35             | 0.04         | -0.36             | 1.46        | 2.1                                   | 0.35   | 3.61   | 3.21 | 2.48  | 4.04     | 3.64    | 1.98     |
| TA-AML1_AML13 | 2.25        | 10.95                    | 11.17                                   | 9.65                                                      | 15.01                     | 9.31                                    | 13.44                                 | 12.04 | 6.28                                | 2.97                                | 5.68      | 3.27    | 3.96                     | 5.53                   | 4                          | 0            | 0          | 0.5             | 1.21                | 0                | 0.1          | 0.61              | 2.73        | 1.62                                  | 0.58   | 4.02   | 1.45 | 2.12  | 11.22    | 3.36    | 1.19     |
| TA-AML3_AML36 | 1.64        | 5.38                     | 5.33                                    | 5.31                                                      | 5.69                      | 5.29                                    | 6                                     | 4.98  | 2.37                                | 0.76                                | 6.5       | 4.95    | 6.28                     | 7.37                   | 7.68                       | 0.97         | 0.43       | 0.87            | 1.89                | 0.18             | 0.13         | 0.2               | 2.19        | 0.82                                  | 0.25   | 2.89   | 2.05 | 1.33  | 14.6     | 2.46    | 0.81     |
| TA-AML2_AML33 | 1.61        | 4.73                     | 4.53                                    | 4.09                                                      | 4.64                      | 4.07                                    | 5.03                                  | 3.39  | 0.56                                | -0.16                               | 4.82      | 5.46    | 6.01                     | 21.47                  | 5.02                       | 0.25         | -0.14      | 0.07            | 0.86                | 0.28             | -0.12        | -0.19             | 0.01        | 0.62                                  | -0.05  | 3.39   | 3.11 | 13.33 | 6.79     | 2.04    | 1.81     |
| TA-AML2_AML42 | 1.96        | 8.31                     | 6.92                                    | 6.92                                                      | 8.73                      | 6.64                                    | 14.22                                 | 11.77 | 2.15                                | 0.76                                | 6.01      | 9.6     | 18.15                    | 34.37                  | 4.71                       | 1.03         | 0.43       | 2.41            | 4.15                | -0.25            | -0.03        | -0.14             | 3.04        | 0.9                                   | -0.22  | 2.49   | 1.51 | 5.69  | 13.22    | 1.43    | 1.36     |
| TA-AML4_AML14 | 2.48        | 5.61                     | 5.47                                    | 5.39                                                      | 9.3                       | 4.73                                    | 9.48                                  | 6.97  | 0.79                                | 2.08                                | 6.51      | 10.55   | 6.87                     | 13.13                  | 8                          | 0.94         | -0.07      | 0.3             | 1.03                | -0.13            | 0.26         | 0.33              | 0.16        | 0.45                                  | 0.08   | 3.43   | 2.7  | 21.18 | 8.38     | 1.98    | 1.97     |
| TA-AML4_AML15 | 3.26        | 4.47                     | 4.25                                    | 4.22                                                      | 9.41                      | 3.89                                    | 4.92                                  | 3.09  | 1.73                                | 1.3                                 | 4.44      | 7.24    | 6.86                     | 7                      | 3.88                       | 7.9          | 6.57       | 3.58            | 4.43                | 0.43             | 0.71         | 0.93              | 2.11        | 1.2                                   | 0.31   | 3.25   | 2.6  | 4.28  | 7.82     | 2.95    | 1.44     |
| TA-AML2_AML22 | 0.4         | -0.02                    | -0.03                                   | 0.49                                                      | 1                         | 0.46                                    | -0.04                                 | -0.02 | -0.12                               | -0.09                               | 0.2       | 2.48    | 2.8                      | 4.07                   | 0.27                       | 0.7          | 0.26       | 0.38            | 0.8                 | 0.08             | 0.43         | 0.65              | 2.59        | 1.15                                  | -0.12  | 2.67   | 0    | 1.27  | 3.32     | 1.96    | 1.01     |
| TA-AML1_AML18 | 8.14        | 6.71                     | 6.35                                    | 5.05                                                      | 8.43                      | 4.12                                    | 7.17                                  | 9.1   | 1.61                                | 0.23                                | 9.65      | 11.78   | 4.88                     | 13.57                  | 7                          | 7.61         | 1.21       | 0.45            | 1.59                | 1.06             | 0.96         | 0.81              | 0.95        | 1.77                                  | 0.1    | 5.11   | 5.78 | 14.17 | 10.37    | 2.71    | 1.73     |
| TA-AML3_AML4  | 2.99        | 9.03                     | 8.53                                    | 7.74                                                      | 11.85                     | 6.75                                    | 12.61                                 | 6.68  | 1.02                                | -0.12                               | 7.26      | 6.7     | 9.98                     | 19.78                  | 6.7                        | 2.44         | 0.62       | 0.54            | 1.84                | 0.11             | 0.15         | 0.17              | 2.88        | 1.44                                  | 0.13   | 4.22   | 3.86 | 7.35  | 7.02     | 3.42    | 1.3      |
| TA-AML2_AML19 | 2.92        | 3.31                     | 2.85                                    | 2.41                                                      | 3.52                      | 2.26                                    | 3.74                                  | 2.3   | 1.12                                | 1.5                                 | 2.73      | 5.23    | 3.63                     | 1.73                   | 5.36                       | 0.68         | 0.93       | 0.32            | 0.19                | 0.48             | 0.54         | 0.98              | 1.65        | 1.57                                  | 0.33   | 3.68   | 3.14 | 2.18  | 4.76     | 3.11    | 2.53     |
| TA-AML2_AML29 | 5.29        | 6.48                     | 6.15                                    | 5.52                                                      | 7.55                      | 5.24                                    | 6.94                                  | 4.48  | 2.72                                | 1.6                                 | 5.87      | 4.1     | 3.65                     | 3.94                   | 3.97                       | 8.39         | 2.05       | 1.66            | 0.85                | 0.61             | 0.75         | 2.57              | 2.2         | 1.46                                  | 0.09   | 3.38   | 2.12 | 1.1   | 17.27    | 2.61    | 1.96     |
| TA-AML2_AML41 | 3.73        | 5.59                     | 5.22                                    | 4.76                                                      | 7.7                       | 3.81                                    | 8.06                                  | 5.29  | 0.65                                | 1.1                                 | 2.53      | 7.96    | 14.65                    | 17.36                  | 14.18                      | 0.94         | 4.57       | 9.8             | 8.37                | -0.2             | -0.25        | -0.13             | 1.52        | 1.08                                  | 0.07   | 3.09   | 2.23 | 4.73  | 16.82    | 1.54    | 0.84     |
| TA-AML4_AML25 | 3.4         | 2.83                     | 2.21                                    | 2.04                                                      | 3.3                       | 1.31                                    | 5.24                                  | 0.8   | 0.4                                 | 0.47                                | 2.08      | 5.51    | 9.87                     | 19.51                  | 10.82                      | 0.94         | 1.78       | 4.41            | 5.65                | -0.11            | 0.1          | -0.01             | 1.22        | 1.47                                  | -0.06  | 2.77   | 3.26 | 7.09  | 10.03    | 2.36    | 1.93     |
| TA-AML1_N1-1  | 0.63        | 4.37                     | 4.37                                    | 4.06                                                      | 4.3                       | 3.51                                    |                                       |       |                                     |                                     |           |         |                          |                        |                            |              |            |                 |                     |                  |              |                   |             |                                       |        |        |      |       |          |         |          |

CD10 Median

|               |                    | Ungated | CD34+CD38 <sup>low</sup> | CD45RA <sup>neg</sup> CD34 <sup>low</sup> CD38 <sup>low</sup> | CD33negCD34 <sup>low</sup> CD38 <sup>low</sup> | HSC-90hi133neg | MPP-90low33neg | CMP-CD34 <sup>low</sup> CD38 <sup>mid</sup> | GMP   | 34negCD38 <sup>high</sup> +Undiff | 34neg38neg | Myelo/Mon | ProMonocyte | CD14neg Mono | CD14+ Mono | 11b+DRneg Mono | ProMyelocyte | Myelocytes | Meta-myelocytes | Mature Granulocyte | Pro-erythroblast | Erythroblast | Late Erythroblast | Pre-B Cells | Mature B cells CD20+CD19+ | Plasma | T Cell | pDC   | mDC   | Basophil | NK Cell | Platelet |       |   |
|---------------|--------------------|---------|--------------------------|---------------------------------------------------------------|------------------------------------------------|----------------|----------------|---------------------------------------------|-------|-----------------------------------|------------|-----------|-------------|--------------|------------|----------------|--------------|------------|-----------------|--------------------|------------------|--------------|-------------------|-------------|---------------------------|--------|--------|-------|-------|----------|---------|----------|-------|---|
| TA-AML1_AML26 | CBF-AML (16;21)    | -0.33   | -0.33                    | -0.35                                                         | -0.35                                          | -0.33          | -0.37          | -0.31                                       | -0.36 | -0.33                             | -0.35      | -0.26     | -0.27       | -0.25        | -0.36      | 0              | -0.31        | -0.31      | -0.34           | -0.34              | -0.36            | -0.36        | -0.41             | -0.31       | 0                         | -0.36  | -0.36  | -0.3  | -0.32 | -0.51    | -0.34   | 1.13     |       |   |
| TA-AML3_AML35 |                    | -0.4    | -0.45                    | -0.45                                                         | -0.45                                          | -0.43          | -0.46          | -0.45                                       | -0.43 | -0.41                             | -0.41      | -0.43     | -0.36       | -0.43        | -0.42      | -0.41          | -0.4         | -0.38      | -0.35           | -0.4               | -0.5             | -0.42        | -0.34             | -0.43       | 0.16                      | -0.39  | -0.43  | -0.35 | -0.27 | -0.37    | -0.46   | -0.47    |       |   |
| TA-AML3_AML5  |                    | -0.43   | -0.47                    | -0.47                                                         | -0.47                                          | -0.47          | -0.46          | -0.46                                       | -0.47 | -0.44                             | -0.43      | -0.43     | -0.45       | -0.44        | -0.46      | -0.46          | -0.38        | -0.41      | -0.39           | -0.41              | -0.42            | -0.67        | -0.47             | -0.37       | -0.39                     | -0.07  | -0.44  | -0.43 | -0.44 | -0.46    | -0.36   | -0.45    | -0.41 |   |
| TA-AML1_AML10 | CBF-AML Inv(16)    | -0.35   | -0.36                    | -0.37                                                         | -0.39                                          | -0.35          | -0.4           | -0.36                                       | -0.38 | -0.38                             | -0.34      | -0.35     | -0.34       | -0.34        | -0.36      | -0.35          | -0.33        | -0.33      | -0.33           | -0.32              | -0.39            | -0.33        | -0.32             | -0.13       | 0.37                      | 0      | -0.38  | -0.37 | -0.37 | -0.34    | -0.37   | -0.4     | -0.44 |   |
| TA-AML2_AML32 |                    | -0.41   | -0.42                    | -0.42                                                         | -0.43                                          | -0.42          | -0.43          | -0.42                                       | -0.42 | -0.41                             | -0.37      | -0.42     | -0.39       | -0.38        | -0.38      | -0.4           | -0.28        | -0.39      | -0.35           | -0.37              | -0.22            | -0.39        | -0.41             | -0.32       | -0.24                     | 0      | -0.39  | -0.4  | -0.39 | -0.39    | -0.43   | -0.39    | -0.26 |   |
| TA-AML3_APL5  | APL (15;17)        | -0.43   | -0.44                    | -0.45                                                         | -0.44                                          | -0.39          | -0.45          | -0.44                                       | -0.47 | -0.4                              | -0.43      | -0.44     | -0.47       | -0.48        | -0.42      | -0.43          | -0.45        | -0.43      | -0.28           | -0.07              | -0.32            | -0.44        | -0.5              | -0.12       | -0.06                     | -0.3   | -0.42  | -0.55 | -0.56 | -0.43    | -0.45   | X        |       |   |
| TA-AML3_APL3  |                    | -0.31   | -0.45                    | -0.45                                                         | -0.5                                           | -0.54          | -0.48          | -0.41                                       | -0.39 | -0.43                             | -0.43      | -0.42     | -0.48       | -0.47        | -0.4       | -0.4           | -0.39        | -0.32      | -0.08           | 0.84               | -0.41            | -0.42        | -0.45             | -0.33       | 0.19                      | -0.42  | -0.44  | -0.27 | -0.6  | -0.48    | -0.44   | -0.36    |       |   |
| TA-AML2_APL4  |                    | -0.39   | -0.45                    | -0.46                                                         | -0.47                                          | -0.47          | -0.46          | -0.46                                       | -0.46 | -0.42                             | -0.39      | 0.4       | 0.4         | 0.41         | -0.41      | -0.42          | -0.41        | -0.36      | -0.23           | -0.26              | -0.27            | -0.48        | -0.39             | -0.17       | -0.28                     | -0.02  | -0.4   | -0.39 | -0.42 | -0.43    | -0.41   | -0.4     | 3.46  |   |
| TA-AML4_APL1  |                    | -0.47   | -0.48                    | -0.48                                                         | -0.55                                          | -0.4           | -0.59          | -0.47                                       | -0.47 | -0.47                             | -0.48      | -0.48     | -0.49       | -0.61        | -0.51      | -0.46          | -0.45        | -0.45      | -0.32           | -0.12              | 0.35             | -0.27        | -0.49             | -0.52       | -0.68                     | -0.1   | -0.51  | -0.49 | -0.45 | -0.49    | -0.48   | -0.49    | -0.55 |   |
| TA-AML1_AML27 | FLT3-ITD+ NK-AML   | -0.32   | -0.32                    | -0.33                                                         | -0.37                                          | -0.26          | -0.39          | -0.32                                       | -0.46 | -0.35                             | -0.32      | -0.33     | -0.32       | -0.34        | -0.34      | -0.25          | -0.24        | -0.2       | -0.17           | 0.42               | -0.32            | -0.36        | -0.41             | -0.2        | 0                         | -0.17  | -0.34  | -0.44 | -0.31 | -0.24    | -0.29   | -0.6     |       |   |
| TA-AML3_AML7  |                    | -0.41   | -0.46                    | -0.49                                                         | -0.51                                          | -0.51          | -0.51          | -0.38                                       | -0.52 | -0.38                             | -0.45      | -0.44     | -0.42       | -0.44        | -0.44      | -0.42          | -0.35        | -0.36      | -0.23           | 0.29               | -0.41            | -0.44        | -0.43             | -0.45       | -0.14                     | -0.34  | -0.43  | -0.5  | -0.35 | -0.39    | -0.45   | X        |       |   |
| TA-AML3_AML9  |                    | -0.3    | -0.44                    | -0.45                                                         | -0.46                                          | -0.5           | -0.45          | -0.44                                       | -0.46 | -0.46                             | -0.42      | -0.43     | -0.44       | -0.42        | -0.43      | -0.36          | -0.32        | -0.25      | -0.28           | 0.33               | -0.46            | -0.43        | -0.44             | -0.26       | 0.14                      | -0.46  | -0.44  | -0.32 | -0.45 | -0.53    | -0.45   | -0.44    |       |   |
| TA-AML2_AML20 |                    | -0.4    | 0.35                     | -0.36                                                         | -0.37                                          | -0.19          | -0.38          | -0.34                                       | -0.41 | -0.41                             | -0.38      | 0.4       | -0.39       | -0.4         | -0.39      | -0.35          | -0.35        | -0.28      | -0.37           | -0.38              | -0.33            | -0.4         | 0.38              | -0.42       | 0.2                       | -0.43  | -0.38  | -0.52 | -0.38 | -0.21    | -0.39   | -0.44    |       |   |
| TA-AML2_AML21 |                    | -0.39   | -0.41                    | -0.41                                                         | -0.41                                          | -0.45          | -0.41          | -0.41                                       | -0.41 | -0.41                             | -0.41      | -0.39     | -0.4        | -0.41        | -0.41      | -0.38          | -0.39        | -0.36      | -0.36           | -0.22              | 0.4              | -0.3         | -0.37             | -0.38       | 2.27                      | 0.06   | -0.42  | -0.4  | -0.28 | -0.4     | -0.34   | -0.4     | -0.36 |   |
| TA-AML2_AML23 |                    | -0.4    | -0.41                    | -0.41                                                         | -0.41                                          | -0.41          | -0.41          | -0.41                                       | -0.41 | -0.41                             | -0.38      | 0.4       | -0.4        | -0.41        | -0.41      | -0.35          | -0.39        | -0.34      | -0.37           | -0.23              | -0.26            | -0.12        | -0.32             | -0.39       | -0.41                     | -0.47  | -0.03  | -0.42 | -0.39 | -0.44    | -0.4    | -0.3     | -0.4  | X |
| TA-AML2_AML30 |                    | -0.37   | -0.41                    | -0.41                                                         | -0.37                                          | -0.35          | -0.37          | -0.42                                       | -0.42 | -0.41                             | -0.39      | 0.4       | -0.4        | -0.4         | -0.41      | -0.36          | -0.34        | -0.33      | -0.25           | -0.06              | -0.09            | -0.42        | -0.52             | -0.09       | 0.04                      | -0.35  | -0.39  | -0.36 | -0.41 | -0.55    | -0.43   | -0.42    |       |   |
| TA-AML2_AML39 |                    | -0.35   | -0.41                    | -0.38                                                         | -0.31                                          | -0.33          | -0.3           | -0.41                                       | -0.36 | -0.35                             | -0.38      | -0.39     | -0.39       | -0.4         | -0.41      | -0.34          | -0.32        | -0.26      | -0.24           | 0.82               | -0.47            | -0.37        | -0.31             | -0.26       | -0.11                     | -0.3   | -0.39  | -0.33 | -0.39 | -0.62    | -0.36   | -0.28    |       |   |
| TA-AML4_AML37 |                    | -0.49   | -0.52                    | -0.52                                                         | -0.52                                          | -0.49          | -0.53          | -0.51                                       | -0.53 | -0.49                             | -0.5       | -0.51     | -0.48       | -0.48        | -0.4       | -0.49          | -0.48        | -0.49      | -0.5            | -0.05              | -0.49            | -0.5         | -0.48             | -0.48       | 1.74                      | -0.14  | -0.4   | -0.47 | -0.49 | -0.52    | -0.44   | -0.47    | -0.65 |   |
| TA-AML4_AML38 |                    | -0.47   | -0.49                    | -0.49                                                         | -0.47                                          | -0.84          | -0.47          | -0.49                                       | -0.47 | -0.49                             | -0.5       | -0.48     | -0.48       | -0.48        | -0.38      | -0.37          | -0.31        | -0.4       | -0.35           | -0.21              | 0.24             | -0.48        | -0.49             | -0.5        | -0.31                     | -0.17  | -0.51  | -0.49 | -0.4  | -0.49    | -0.28   | -0.49    | -0.45 |   |
| TA-AML4_AML40 | -0.48              | -0.53   | -0.53                    | -0.53                                                         | -0.54                                          | -0.51          | -0.5           | -0.49                                       | -0.49 | -0.47                             | -0.48      | -0.51     | -0.53       | -0.53        | -0.48      | -0.46          | -0.42        | -0.38      | -0.35           | -0.16              | -0.52            | -0.48        | -0.48             | -0.39       | -0.04                     | -0.49  | -0.49  | -0.53 | -0.48 | -0.5     | -0.49   | -0.49    |       |   |
| TA-AML3_AML6  | FLT3-TKD+ NK-AML   | -0.43   | -0.47                    | -0.47                                                         | -0.5                                           | -0.55          | -0.48          | -0.41                                       | -0.44 | -0.45                             | -0.4       | -0.44     | -0.44       | -0.44        | -0.44      | -0.42          | -0.32        | 0.09       | 0.09            | 0.89               | -0.51            | -0.42        | -0.47             | -0.27       | 0.3                       | -0.42  | -0.43  | -0.51 | -0.42 | -0.61    | -0.43   | -0.38    |       |   |
| TA-AML2_AML31 |                    | -0.39   | -0.4                     | -0.39                                                         | -0.41                                          | -0.44          | -0.41          | -0.4                                        | -0.35 | -0.38                             | -0.39      | -0.38     | -0.38       | -0.47        | -0.67      | -0.49          | -0.33        | -0.28      | -0.3            | -0.18              | -0.32            | -0.38        | -0.45             | -0.28       | 0.04                      | -0.35  | -0.42  | -0.47 | -0.38 | -0.52    | -0.43   | -0.29    |       |   |
| TA-AML4_AML8  |                    | -0.42   | -0.51                    | -0.51                                                         | -0.42                                          | -0.36          | -0.48          | -0.54                                       | -0.55 | -0.5                              | -0.51      | -0.5      | -0.46       | -0.46        | -0.49      | -0.42          | -0.41        | -0.41      | -0.36           | 0.31               | -0.42            | -0.5         | -0.64             | -0.43       | -0.21                     | -0.49  | -0.49  | -0.48 | -0.64 | -0.64    | -0.49   | -0.5     |       |   |
| TA-AML1_AML18 | FLT3wt NK-AML      | -0.29   | -0.34                    | -0.34                                                         | -0.38                                          | -0.41          | -0.38          | -0.27                                       | -0.39 | -0.35                             | -0.38      | -0.29     | -0.33       | -0.35        | -0.34      | -0.34          | -0.32        | -0.29      | -0.18           | 0                  | -0.26            | -0.33        | -0.35             | 1.41        | 0.07                      | -0.33  | -0.34  | -0.46 | -0.35 | 1.03     | -0.37   | -0.33    |       |   |
| TA-AML3_AML36 |                    | -0.42   | -0.47                    | -0.47                                                         | -0.47                                          | -0.27          | -0.48          | -0.45                                       | -0.45 | -0.44                             | -0.46      | -0.39     | -0.42       | -0.4         | -0.4       | -0.38          | -0.34        | -0.38      | -0.3            | -0.39              | -0.26            | -0.41        | -0.43             | -0.47       | 0.28                      | -0.01  | -0.42  | -0.44 | -0.29 | -0.59    | -0.41   | -0.46    | -0.44 |   |
| TA-AML2_AML33 |                    | -0.21   | -0.41                    | -0.41                                                         | -0.41                                          | -0.41          | -0.42          | -0.39                                       | -0.42 | -0.32                             | -0.38      | 0.4       | -0.41       | -0.4         | -0.39      | -0.28          | -0.35        | -0.34      | -0.25           | 0.67               | -0.38            | -0.39        | -0.43             | 3.3         | 0.62                      | -0.33  | -0.38  | -0.44 | -0.38 | -0.34    | -0.44   | -0.38    | -0.36 |   |
| TA-AML2_AML42 |                    | -0.31   | -0.44                    | -0.45                                                         | -0.45                                          | -0.47          | -0.45          | -0.39                                       | -0.39 | -0.42                             | -0.42      | -0.38     | -0.4        | -0.38        | -0.4       | -0.31          | -0.35        | -0.39      | 0.12            | 1.16               | -0.37            | -0.35        | -0.37             | 0.76        | -0.15                     | -0.39  | -0.4   | -0.38 | -0.64 | -0.4     | -0.4    | -0.42    |       |   |
| TA-AML4_AML14 |                    | -0.4    | -0.5                     | -0.5                                                          | -0.51                                          | -0.5           | -0.51          | -0.46                                       | -0.5  | -0.48                             | -0.52      | -0.51     | -0.5        | -0.45        | -0.49      | -0.45          | -0.48        | -0.15      | 0.51            | 1.66               | -0.51            | -0.48        | -0.52             | 3.27        | -0.02                     | -0.5   | -0.5   | -0.45 | -0.5  | -0.22    | -0.5    | -0.62    |       |   |
| TA-AML4_AML15 | -0.49              | -0.51   | -0.51                    | -0.52                                                         | -0.48                                          | -0.52          | -0.5           | -0.51                                       | -0.5  | -0.48                             | -0.48      | -0.49     | -0.49       | -0.49        | -0.53      | -0.5           | -0.4         | -0.36      | -0.43           | -0.37              | -0.51            | -0.48        | -0.54             | -0.52       | 0.33                      | -0.57  | -0.5   | -0.5  | -0.53 | -0.31    | -0.51   | -0.5     | -0.52 |   |
| TA-AML2_AML22 | MLL (10;11)        | -0.41   | -0.42                    | -0.42                                                         | -0.39                                          | -0.42          | -0.39          | -0.43                                       | -0.43 | -0.42                             | -0.41      | -0.42     | -0.38       | -0.39        | -0.49      | -0.23          | -0.33        | -0.33      | -0.34           | -0.18              | -0.35            | -0.4         | -0.39             | -0.3        | 0.2                       | -0.4   | -0.4   | -0.42 | -0.27 | -0.32    | -0.43   | -0.3     |       |   |
| TA-AML1_AML18 |                    | -0.35   | -0.33                    | -0.33                                                         | -0.32                                          | -0.17          | -0.34          | -0.33                                       | -0.42 | -0.29                             | -0.36      | -0.39     | -0.35       | -0.28        | -0.35      | -0.35          | -0.36        | -0.32      | -0.23           | 0                  | -0.35            | -0.33        | -0.35             | 3           | 0.21                      | -0.42  | -0.35  | -0.36 | -0.37 | -0.45    | -0.35   | -0.32    |       |   |
| TA-AML3_AML4  |                    | -0.32   | -0.2                     | -0.22                                                         | -0.25                                          | -0.16          | -0.27          | -0.08                                       | -0.39 | -0.38                             | -0.43      | -0.38     | -0.39       | -0.47        | -0.45      | -0.45          | -0.41        | -0.4       | -0.37           | 0.68               | -0.39            | -0.43        | -0.4              | 2.99        | 0.02                      | -0.38  | -0.44  | -0.41 | -0.33 | -0.48    | -0.45   | -0.44    |       |   |
| TA-AML2_AML19 |                    | -0.37   | -0.39                    | -0.4                                                          | -0.39                                          | -0.4           | -0.39          | -0.4                                        | -0.41 | -0.4                              | -0.36      | -0.39     | -0.38       | -0.35        | -0.42      | -0.3           | -0.38        | -0.35      | -0.23           | 0.01               | -0.49            | -0.38        | -0.48             | -0.45       | -0.09                     | -0.42  | -0.4   | -0.46 | -0.36 | -0.35    | -0.4    | -0.46    |       |   |
| TA-AML2_AML29 |                    | -0.34   | -0.35                    | -0.35                                                         | -0.33                                          | -0.3           | -0.34          | -0.35                                       | -0.32 | -0.12                             | -0.3       | -0.37     | -0.32       | -0.39        | -0.33      | -0.38          | -0.33        | -0.33      | -0.29           | -0.11              | -0.44            | -0.39        | -0.44             | 4.78        | 0.06                      | -0.4   | -0.4   | -0.45 | -0.55 | -0.1     | -0.39   | -0.35    |       |   |
| TA-AML2_AML41 | ADK-AML Cmply/Mono | -0.31   | -0.36                    | -0.37                                                         | -0.36                                          | -0.34          | -0.38          | -0.32                                       | -0.39 | -0.42                             | -0.39      | -0.42     | -0.4        | -0.34        | -0.29      | 0.26           | -0.35        | -0.07      | 0.67            | -0.99              | -0.39            | -0.4         | -0.41             | -0.3        | 0.44                      | -0.38  | -0.39  | -0.41 | -0.5  | -0.68    | -0.42   | -0.41    |       |   |
| TA-AML4_AML25 | -0.32              | -0.38   | -0.48                    | -0.49                                                         | -0.46                                          | -0.5           | 0.17           | -0.49                                       | -0.51 | -0.5                              | -0.47      | -0.53     | -0.53       | -0.52        | -0.43      | -0.47          | -0.29        | 0.64       |                 |                    |                  |              |                   |             |                           |        |        |       |       |          |         |          |       |   |

CD19 Median

Table with columns for cell populations (e.g., Ungated, CD34+CD38low, CD45RANneg, etc.) and rows for various AML types (TA-AML1, TA-AML2, etc.) and healthy donors. Each cell contains a numerical value representing the median CD19 expression.

**CD20 Median**

|               | Untaged | CD34+CD38 <sup>low</sup> | CD45RA <sup>neg</sup> CD34 <sup>+</sup> CD38 <sup>low</sup> | CD33 <sup>neg</sup> CD3 <sup>4+</sup> CD38 <sup>low</sup> | HSC-90hi13 <sup>neg</sup> | MPP-90 <sup>low</sup> 33 <sup>neg</sup> | CMP-CD34 <sup>+</sup> CD33 <sup>mid</sup> | GMP   | 34 <sup>neg</sup> CD38 <sup>+</sup> Undiff | 34 <sup>neg</sup> 38 <sup>neg</sup> Undiff | Myelo/Mon | ProMono | CD14 <sup>neg</sup> Mono | CD14 <sup>+</sup> Mono | 11b+DR <sup>neg</sup> | ProMyelocyte | Myelocytes | Meta-myelocytes | Mature Granulocyte | Pro-erythroblast | Erythroblast | Late Erythroblast | Pre-B Cells | Mature B cells CD20+CD19+ | Plasma | T Cell | pDC   | mDC   | Basophil | NK Cell | Platelet |       |
|---------------|---------|--------------------------|-------------------------------------------------------------|-----------------------------------------------------------|---------------------------|-----------------------------------------|-------------------------------------------|-------|--------------------------------------------|--------------------------------------------|-----------|---------|--------------------------|------------------------|-----------------------|--------------|------------|-----------------|--------------------|------------------|--------------|-------------------|-------------|---------------------------|--------|--------|-------|-------|----------|---------|----------|-------|
| TA-AML1_AML26 | -0.25   | -0.23                    | -0.27                                                       | -0.27                                                     | -0.24                     | -0.28                                   | -0.2                                      | -0.28 | -0.23                                      | -0.28                                      | -0.2      | -0.22   | -0.23                    | -0.26                  | -0.04                 | -0.25        | -0.25      | -0.29           | -0.29              | -0.13            | -0.14        | -0.29             | 0.15        | 135.08                    | -0.1   | -0.22  | -0.25 | -0.28 | -0.32    | -0.38   | 0.53     |       |
| TA-AML1_AML35 | -0.31   | -0.33                    | -0.33                                                       | -0.34                                                     | -0.33                     | -0.34                                   | -0.32                                     | -0.33 | -0.34                                      | -0.29                                      | -0.3      | -0.36   | -0.4                     | -0.39                  | -0.39                 | -0.31        | -0.34      | -0.37           | -0.35              | -0.27            | -0.08        | -0.17             | 1.65        | 132.87                    | -0.17  | -0.25  | -0.5  | -0.32 | -0.41    | -0.43   | -0.4     |       |
| TA-AML1_AML5  | -0.37   | -0.42                    | -0.43                                                       | -0.43                                                     | -0.41                     | -0.44                                   | -0.4                                      | -0.45 | -0.28                                      | -0.15                                      | -0.42     | -0.4    | -0.44                    | -0.44                  | -0.28                 | -0.37        | -0.28      | -0.34           | -0.37              | -0.64            | -0.3         | -0.22             | 0.51        | 81.45                     | -0.29  | -0.39  | -0.42 | -0.35 | -0.27    | -0.43   | -0.56    |       |
| TA-AML1_AML10 | -0.27   | -0.29                    | -0.29                                                       | -0.34                                                     | -0.29                     | -0.36                                   | -0.27                                     | -0.34 | -0.32                                      | -0.3                                       | -0.27     | -0.24   | -0.21                    | -0.29                  | -0.26                 | -0.2         | -0.16      | -0.21           | -0.26              | -0.04            | -0.05        | -0.43             | 0.62        | 157.27                    | -0.16  | -0.27  | -0.08 | -0.31 | -0.3     | -0.33   | -0.31    |       |
| TA-AML2_AML32 | -0.37   | -0.4                     | -0.4                                                        | -0.41                                                     | -0.4                      | -0.41                                   | -0.39                                     | -0.4  | -0.26                                      | -0.26                                      | -0.38     | -0.38   | -0.37                    | -0.39                  | -0.38                 | -0.35        | -0.3       | -0.32           | -0.36              | -0.04            | -0.25        | -0.38             | 1.66        | 138.06                    | -0.23  | -0.33  | 0.48  | -0.36 | -0.38    | -0.37   | -0.44    |       |
| TA-AML3_AML5  | -0.38   | -0.41                    | -0.4                                                        | -0.44                                                     | -0.48                     | -0.43                                   | -0.41                                     | -0.46 | -0.36                                      | -0.34                                      | -0.38     | -0.45   | -0.46                    | -0.33                  | -0.4                  | -0.35        | -0.36      | -0.33           | -0.35              | -0.11            | -0.04        | -0.4              | 0.51        | 99.35                     | -0.12  | -0.38  | -0.55 | -0.39 | -0.42    | -0.4    | X        |       |
| TA-AML3_AML3  | -0.29   | -0.36                    | -0.36                                                       | -0.35                                                     | -0.19                     | -0.37                                   | -0.39                                     | -0.32 | -0.32                                      | -0.31                                      | -0.32     | -0.27   | -0.41                    | -0.43                  | -0.29                 | -0.27        | -0.19      | -0.24           | -0.24              | -0.07            | -0.19        | -0.28             | 0.58        | 124.25                    | -0.17  | -0.41  | -0.45 | -0.34 | -0.29    | -0.39   | -0.44    |       |
| TA-AML2_AML4  | -0.34   | -0.38                    | -0.38                                                       | -0.39                                                     | -0.35                     | -0.39                                   | -0.37                                     | -0.37 | -0.37                                      | -0.34                                      | -0.32     | -0.35   | -0.39                    | -0.41                  | -0.41                 | -0.36        | -0.31      | -0.36           | -0.32              | -0.34            | -0.15        | -0.08             | 0.04        | 0.03                      | 147.89 | -0.1   | -0.26 | -0.49 | -0.4     | -0.38   | -0.37    | 37.79 |
| TA-AML4_AML1  | -0.41   | -0.45                    | -0.44                                                       | -0.61                                                     | -0.66                     | -0.53                                   | -0.44                                     | -0.42 | -0.41                                      | -0.41                                      | -0.41     | -0.41   | -0.52                    | -0.52                  | -0.35                 | -0.36        | -0.4       | -0.4            | -0.4               | -0.73            | -0.35        | -0.4              | 1.08        | 107.55                    | -0.09  | -0.41  | -0.55 | -0.44 | -0.39    | -0.49   | -0.26    |       |
| TA-AML1_AML27 | -0.22   | -0.31                    | -0.32                                                       | -0.38                                                     | -0.36                     | -0.39                                   | -0.31                                     | -0.26 | -0.27                                      | -0.26                                      | -0.21     | -0.25   | -0.33                    | -0.17                  | -0.1                  | -0.11        | -0.07      | -0.28           | -0.28              | -0.06            | -0.06        | -0.37             | 0.99        | 105.46                    | -0.31  | -0.17  | -0.46 | -0.17 | -0.01    | -0.34   | -0.18    |       |
| TA-AML3_AML7  | -0.38   | -0.44                    | -0.43                                                       | -0.37                                                     | -0.23                     | -0.38                                   | -0.53                                     | -0.33 | -0.35                                      | -0.21                                      | -0.39     | -0.37   | -0.4                     | -0.41                  | -0.4                  | -0.31        | -0.32      | -0.35           | -0.35              | -0.14            | -0.33        | -0.39             | 0.86        | 82.02                     | -0.13  | -0.42  | -0.38 | -0.25 | -0.4     | -0.43   | X        |       |
| TA-AML1_AML9  | -0.26   | -0.44                    | -0.44                                                       | -0.45                                                     | -0.44                     | -0.45                                   | -0.43                                     | -0.45 | -0.33                                      | -0.38                                      | -0.39     | -0.37   | -0.36                    | -0.41                  | -0.21                 | -0.17        | -0.13      | -0.15           | -0.11              | -0.17            | -0.31        | -0.41             | 1.18        | 157.13                    | -0.17  | -0.38  | -0.31 | -0.4  | -0.41    | -0.43   | -0.4     |       |
| TA-AML2_AML20 | -0.35   | -0.38                    | -0.35                                                       | -0.39                                                     | -0.38                     | -0.41                                   | -0.34                                     | -0.36 | -0.38                                      | -0.32                                      | -0.35     | -0.31   | -0.36                    | -0.38                  | -0.25                 | -0.29        | -0.23      | -0.28           | -0.34              | -0.36            | -0.26        | -0.35             | 0.57        | 232.14                    | -0.28  | -0.34  | -0.4  | -0.37 | -0.5     | -0.35   | -0.59    |       |
| TA-AML2_AML21 | -0.37   | -0.39                    | -0.39                                                       | -0.41                                                     | -0.41                     | -0.39                                   | -0.38                                     | -0.27 | -0.29                                      | -0.37                                      | -0.37     | -0.43   | -0.33                    | -0.32                  | -0.29                 | -0.21        | -0.26      | -0.28           | -0.4               | -0.28            | -0.29        | 2.43              | 321.13      | -0.17                     | -0.38  | -0.3   | -0.37 | -0.34 | -0.37    | -0.2    |          |       |
| TA-AML2_AML23 | -0.35   | -0.41                    | -0.41                                                       | -0.4                                                      | -0.37                     | -0.41                                   | -0.41                                     | -0.39 | -0.34                                      | -0.32                                      | -0.35     | -0.3    | -0.31                    | -0.32                  | -0.35                 | -0.3         | -0.31      | -0.23           | -0.23              | -0.18            | -0.15        | -0.19             | -0.01       | 128.6                     | -0.19  | -0.3   | -0.41 | -0.33 | -0.28    | -0.38   | X        |       |
| TA-AML2_AML30 | -0.36   | -0.41                    | -0.4                                                        | -0.39                                                     | -0.47                     | -0.38                                   | -0.41                                     | -0.3  | -0.35                                      | -0.34                                      | -0.36     | -0.38   | -0.37                    | -0.38                  | -0.3                  | -0.25        | -0.2       | -0.31           | -0.33              | -0.37            | -0.19        | -0.15             | 0.23        | 151.54                    | -0.18  | -0.36  | -0.42 | -0.39 | -0.5     | -0.36   | -0.5     |       |
| TA-AML2_AML39 | -0.32   | -0.4                     | -0.39                                                       | -0.32                                                     | -0.4                      | -0.32                                   | -0.4                                      | -0.42 | -0.28                                      | -0.26                                      | -0.33     | -0.34   | -0.36                    | -0.38                  | -0.2                  | -0.22        | -0.11      | -0.19           | -0.16              | -0.1             | -0.05        | -0.22             | -0.05       | 115.66                    | -0.22  | -0.33  | -0.34 | -0.38 | -0.35    | -0.36   | -0.41    |       |
| TA-AML4_AML37 | -0.49   | -0.53                    | -0.53                                                       | -0.53                                                     | -0.48                     | -0.53                                   | -0.53                                     | -0.35 | -0.5                                       | -0.51                                      | -0.52     | -0.45   | -0.46                    | -0.46                  | -0.46                 | -0.35        | -0.37      | -0.41           | -0.4               | -0.22            | -0.45        | 1.06              | 115.29      | -0.18                     | -0.43  | -0.52  | -0.54 | -0.46 | -0.47    | -0.76   |          |       |
| TA-AML4_AML38 | -0.4    | -0.48                    | -0.49                                                       | -0.5                                                      | -0.6                      | -0.5                                    | -0.48                                     | -0.48 | -0.42                                      | -0.43                                      | -0.41     | -0.45   | -0.46                    | -0.37                  | -0.4                  | -0.27        | -0.32      | -0.38           | -0.31              | -0.12            | -0.36        | -0.48             | 0.8         | 105.68                    | -0.26  | -0.45  | -0.46 | -0.41 | -0.47    | -0.44   | -0.41    |       |
| TA-AML4_AML40 | -0.42   | -0.43                    | -0.43                                                       | -0.45                                                     | -0.45                     | -0.44                                   | -0.4                                      | -0.45 | -0.42                                      | -0.46                                      | -0.37     | -0.47   | -0.39                    | -0.36                  | -0.28                 | -0.32        | -0.32      | -0.42           | -0.4               | -0.12            | -0.36        | -0.48             | 0.42        | 408.67                    | -0.36  | -0.45  | -0.46 | -0.19 | -0.8     | -0.44   | -0.49    |       |
| TA-AML3_AML6  | -0.41   | -0.39                    | -0.39                                                       | -0.37                                                     | -0.26                     | -0.39                                   | -0.41                                     | -0.44 | -0.44                                      | -0.38                                      | -0.42     | -0.38   | -0.38                    | -0.4                   | -0.38                 | -0.31        | -0.14      | -0.19           | -0.03              | -0.42            | -0.18        | -0.39             | 0.28        | 170                       | -0.05  | -0.42  | -0.31 | -0.4  | -0.53    | -0.42   | -0.44    |       |
| TA-AML2_AML31 | -0.35   | -0.4                     | -0.44                                                       | -0.44                                                     | -0.52                     | -0.43                                   | -0.39                                     | -0.34 | -0.36                                      | -0.37                                      | -0.35     | -0.36   | -0.35                    | -0.24                  | -0.22                 | -0.29        | -0.33      | -0.34           | -0.39              | -0.17            | -0.14        | -0.27             | -0.03       | 258.53                    | -0.13  | -0.34  | -0.45 | -0.31 | -0.22    | -0.41   | -0.41    |       |
| TA-AML4_AML8  | -0.43   | -0.46                    | -0.47                                                       | -0.55                                                     | -0.47                     | -0.63                                   | -0.36                                     | -0.48 | -0.34                                      | -0.5                                       | -0.38     | -0.42   | -0.42                    | -0.43                  | -0.43                 | -0.25        | -0.32      | -0.4            | -0.39              | -0.26            | -0.27        | -0.46             | 1.18        | 75.86                     | -0.27  | -0.47  | -0.39 | -0.42 | -0.62    | -0.46   | -0.49    |       |
| TA-AML1_AML13 | -0.27   | -0.32                    | -0.32                                                       | -0.34                                                     | -0.18                     | -0.35                                   | -0.27                                     | -0.31 | -0.32                                      | -0.33                                      | -0.17     | -0.11   | -0.28                    | -0.29                  | -0.32                 | -0.2         | -0.15      | -0.27           | -0.21              | -0.02            | -0.09        | -0.3              | 2.74        | 214.27                    | 0      | -0.29  | -0.15 | -0.34 | -0.02    | -0.24   | -0.34    |       |
| TA-AML3_AML36 | -0.37   | -0.45                    | -0.46                                                       | -0.46                                                     | -0.41                     | -0.46                                   | -0.37                                     | -0.4  | -0.36                                      | -0.39                                      | -0.34     | -0.38   | -0.42                    | -0.52                  | -0.42                 | -0.3         | -0.31      | -0.42           | -0.41              | -0.29            | -0.17        | -0.39             | 1.31        | 285.39                    | -0.2   | -0.41  | -0.09 | -0.37 | -0.44    | -0.42   | -0.41    |       |
| TA-AML2_AML33 | -0.31   | -0.36                    | -0.36                                                       | -0.36                                                     | -0.38                     | -0.34                                   | -0.37                                     | -0.38 | -0.17                                      | -0.29                                      | -0.36     | -0.35   | -0.25                    | -0.39                  | -0.34                 | -0.24        | -0.18      | -0.28           | -0.31              | -0.22            | -0.28        | -0.39             | 5.39        | 521.28                    | -0.25  | -0.33  | -0.29 | -0.34 | -0.43    | -0.34   | -0.27    |       |
| TA-AML2_AML42 | -0.35   | -0.36                    | -0.36                                                       | -0.36                                                     | -0.5                      | -0.35                                   | -0.35                                     | -0.37 | -0.37                                      | -0.37                                      | -0.29     | -0.31   | -0.35                    | -0.39                  | -0.3                  | -0.3         | -0.39      | -0.36           | -0.35              | -0.27            | -0.23        | -0.33             | 1.05        | 178.6                     | -0.14  | -0.35  | -0.42 | -0.66 | -0.06    | -0.34   | -0.38    |       |
| TA-AML4_AML14 | -0.38   | -0.48                    | -0.48                                                       | -0.48                                                     | -0.43                     | -0.49                                   | -0.48                                     | -0.48 | -0.39                                      | -0.5                                       | -0.47     | -0.39   | -0.5                     | -0.43                  | -0.48                 | -0.41        | -0.4       | -0.38           | -0.32              | -0.36            | -0.32        | -0.43             | 4.92        | 167.76                    | -0.24  | -0.47  | -0.52 | -0.42 | -0.47    | -0.51   | -0.34    |       |
| TA-AML4_AML15 | -0.46   | -0.48                    | -0.49                                                       | -0.49                                                     | -0.51                     | -0.48                                   | -0.47                                     | -0.49 | -0.48                                      | -0.47                                      | -0.46     | -0.45   | -0.5                     | -0.61                  | -0.5                  | -0.41        | -0.45      | -0.48           | -0.51              | -0.22            | -0.33        | -0.5              | 1.15        | 227.23                    | -0.23  | -0.47  | -0.66 | -0.22 | -0.43    | -0.46   | -0.43    |       |
| TA-AML2_AML22 | -0.37   | -0.42                    | -0.42                                                       | -0.39                                                     | -0.34                     | -0.4                                    | -0.42                                     | -0.42 | -0.38                                      | -0.37                                      | -0.39     | -0.34   | -0.36                    | -0.28                  | -0.17                 | -0.23        | -0.15      | -0.3            | -0.32              | -0.17            | -0.18        | -0.3              | 1.25        | 223.35                    | -0.32  | -0.34  | -0.28 | -0.62 | -0.49    | -0.32   | -0.5     |       |
| TA-AML1_AML18 | -0.34   | -0.32                    | -0.32                                                       | -0.34                                                     | -0.32                     | -0.36                                   | -0.32                                     | -0.37 | -0.15                                      | -0.21                                      | -0.36     | -0.34   | -0.22                    | -0.32                  | -0.4                  | -0.29        | -0.26      | -0.33           | -0.33              | 0                | -0.14        | -0.3              | 9.74        | 191.02                    | -0.14  | -0.3   | -0.29 | -0.32 | -0.48    | -0.31   | -0.29    |       |
| TA-AML3_AML4  | -0.34   | -0.38                    | -0.39                                                       | -0.41                                                     | -0.37                     | -0.42                                   | -0.32                                     | -0.39 | -0.31                                      | -0.38                                      | -0.34     | -0.3    | -0.38                    | -0.48                  | -0.35                 | -0.35        | -0.31      | -0.34           | -0.33              | -0.22            | -0.38        | -0.45             | 1.92        | 102.55                    | -0.33  | -0.38  | -0.23 | -0.13 | -0.14    | -0.41   | -0.45    |       |
| TA-AML2_AML19 | -0.33   | -0.34                    | -0.34                                                       | -0.37                                                     | -0.36                     | -0.37                                   | -0.32                                     | -0.38 | -0.3                                       | -0.3                                       | -0.31     | -0.31   | -0.34                    | -0.34                  | -0.27                 | -0.28        | -0.22      | -0.33           | -0.37              | -0.19            | -0.06        | -0.39             | 1.61        | 157.2                     | -0.18  | -0.34  | -0.35 | -0.31 | -0.37    | -0.32   | -0.42    |       |
| TA-AML2_AML29 | -0.35   | -0.39                    | -0.39                                                       | -0.39                                                     | -0.38                     | -0.39                                   | -0.38                                     | -0.37 | -0.33                                      | -0.32                                      | -0.35     | -0.25   | -0.39                    | -0.48                  | -0.29                 | -0.34        | -0.26      | -0.28           | -0.31              | -0.13            | -0.2         | -0.38             | 1.49        | 119.06                    | -0.29  | -0.36  | -0.23 | -0.36 | -0.64    | -0.39   | -0.3     |       |
| TA-AML2_AML41 | -0.32   | -0.37                    | -0.38                                                       | -0.39                                                     | -0.34                     | -0.4                                    | -0.32                                     | -0.32 | -0.35                                      | -0.33                                      | -0.36     | -0.34   | -0.36                    | -0.36                  | -0.36                 | -0.34        | -0.34      | -0.36           | -0.34              | -0.17            | -0.22        | -0.41             | 0.6         | 279.06                    | -0.35  | -0.25  | -0.39 | -0.39 | -0.35    | -0.3    | -0.4     |       |
| TA-AML4_AML25 | -0.42   | -0.4                     | -0.41                                                       | -0.42                                                     | -0.39                     | -0.43                                   | -0.38                                     | -0.36 | -0.39                                      | -0.46                                      | -0.34     | -0.32   | -0.32                    | -0.42                  | -0.41                 | -0.34        | -0.39      | -0.43           | -0.42              | -0.37            | -0.37        | -0.44             | 1.05        | 195.41                    | -0.34  | -0.44  | -0.59 | -0.48 | -0.47    | -0.48   | -0.48    |       |



**p56 Median**

|                    | CD34+CD38 <sup>low</sup> | HSC/MPP-4 <sup>CD38<sup>low</sup></sup> | CD133negCD38 <sup>low</sup> | CD34+CD38 <sup>low</sup> cwcCD33mid | GMP  | 34negCD38 <sup>low</sup> +Undiff | 34neg38neg Undiff | Myelo/Mono blast | ProMonocyte | CD14neg Mono | CD14+ Mono | 11b+DRneg Mono | ProMyelocyte | Myelocytes | Meta-myelocytes | Mature Granulocyte | Pro-erythroblast | Erythroblast | Late Erythroblast | Pre-B Cells | Mature B cells CD19+CD19 <sup>+</sup> | Plasma | T Cell | pDC  | mDC  | Basophil | NK Cell | Platelet |      |
|--------------------|--------------------------|-----------------------------------------|-----------------------------|-------------------------------------|------|----------------------------------|-------------------|------------------|-------------|--------------|------------|----------------|--------------|------------|-----------------|--------------------|------------------|--------------|-------------------|-------------|---------------------------------------|--------|--------|------|------|----------|---------|----------|------|
| CBF-AML t(8;21)    | 1.61                     | 1.22                                    | 1.2                         | 1.51                                | 1.38 | 1.03                             | 0.81              | 1.67             | 2.31        | 2.29         | 1.67       | 10.23          | 1.56         | 2.07       | 1.7             | 1.97               | 2.1              | 1.01         | 0.92              | 0.98        | 1.41                                  | 0.84   | 1.45   | 1.03 | 1.49 | 0.87     | 9.04    |          |      |
| CBF-AML inv(16)    | 1.67                     | 1.61                                    | 1.45                        | 1.71                                | 1.38 | 1.03                             | 0.92              | 1.69             | 1.86        | 1.71         | 1.8        | 2.22           | 2.27         | 2.32       | 2.02            | 1.55               | 3.57             | 3.89         | 4.33              | 1.75        | 1.88                                  | 1.96   | 0.97   | 1.53 | 1.61 | 1.14     | 1.09    | 0.71     |      |
| APL t(15;17)       | 2.37                     | 2.6                                     | 2.14                        | 2.63                                | 2.63 | 2.42                             | 2.16              | 2.21             | 2.22        | 2.06         | 1.41       | 2.7            | 2.57         | 3.07       | 1.09            | 0.94               | 4.42             | 6.23         | 2.53              | 3           | 1.33                                  | 2.84   | 1.09   | 2.06 | 0.98 | 2.67     | 2.08    | X        |      |
| FLT3-ITD+ NK-AML   | 2.01                     | 1.78                                    | 1.1                         | 1.94                                | 0.85 | 1.38                             | 0.92              | 1.78             | 2.21        | 1.97         | 2.11       | 3.35           | 3.33         | 3.15       | 3.62            | 2.4                | 6.2              | 2.81         | 0.82              | 3.3         | 1.88                                  | 1.84   | 0.98   | 1.4  | 1.57 | 2.61     | 2.12    | 2.6      |      |
| FLT3-TKD+ NK-AML   | 1.23                     | 1.26                                    | 0.95                        | 1.31                                | 1.16 | 1.06                             | 0.88              | 1.25             | 1.36        | 1.26         | 1.11       | 0.78           | 1.36         | 1.37       | 1.26            | 1.04               | 4.78             | 5.55         | 1.96              | 1.53        | 1.73                                  | 2.51   | 0.73   | 1.1  | 1.44 | 0.68     | 1.26    | 0.25     |      |
| FLT3wt NK-AML      | 1.28                     | 0.74                                    | 0.39                        | 1.36                                | 0.66 | 0.35                             | 0.03              | 0.96             | 1.28        | 0.82         | 0.9        | 0.78           | 8.04         | 7.87       | 4.33            | 5.1                | 0.63             | 4.72         | 5.23              | 3.96        | 0.87                                  | 3.49   | 0.56   | 0.55 | 0    | 2.35     | 0.39    | -0.13    |      |
| MLL t(10;11)       | 1.49                     | 2.17                                    | 1.58                        | 2.33                                | 1.33 | 0.95                             | 1.22              | 1.68             | 1.88        | 1.55         | 1.75       | 1.56           | 1.68         | 1.03       | 0.74            | 0.66               | 4.59             | 3.34         | 1.22              | 1.46        | 0.72                                  | 1.47   | 0.79   | 2.98 | 2.63 | 0.18     | 1.25    | 0.59     |      |
| ADK-AML Cmplx/Mono | 0.92                     | 1.22                                    | 0.89                        | 2.41                                | 0.98 | 0.36                             | 0.05              | 0.2              | 0.61        | 0.84         | 0.93       | 0.91           | 0.95         | 1.23       | 1.3             | 1.08               | 2.55             | 4.41         | 1.73              | 1.12        | 1.34                                  | 0.92   | 0.75   | 1.37 | 0.07 | -0.18    | 0.48    | -0.03    |      |
| Healthy Donors     | 0.73                     | 1.58                                    | 1.27                        | 2                                   | 1.77 | 1.5                              | 0.72              | 1.59             | 1.39        | 1.34         | 1          | 1.12           | 1.05         | 0.69       | 0.67            | 0.68               | 4.32             | 2.73         | 1.12              | 1.02        | 0.49                                  | 0.75   | 1.62   | 0.57 | 1.26 | 1.9      | 0.07    | 0.91     | 0.13 |
| CR / CR1           | 0.97                     | 0.85                                    | 0.18                        | 3                                   | 0.45 | 0.76                             | 0.7               | 1.02             | 0.97        | 0.69         | 0.87       | 0.96           | 0.97         | 0.86       | 0.79            | 0.8                | 1.99             | 2.94         | 2.67              | 0.79        | 1.11                                  | 1.15   | 0.7    | 0.79 | 0.63 | 1.74     | 0.62    | 0        |      |

**PAKT Median**

|                    | Un gated | CD34-CD38 |           | HSC/MP/ - |           | CMP-      |           | GMP   | 34negCD38 |           | Myelo/Mono | ProMonocyte | CD14neg Mono | CD14+ Mono | 11b+DRng Mono | ProMyelocyte | Myelocytes | Meta-myelocytes | Mature Granulocyte | Pro-erythroblast | Erythroblast | Late Erythroblast | Pre-B Cells | Mature B cells CD20-CD19+ | Plasma | T Cell | pDC   | mDC   | Basophil | NK Cell | Platelet |
|--------------------|----------|-----------|-----------|-----------|-----------|-----------|-----------|-------|-----------|-----------|------------|-------------|--------------|------------|---------------|--------------|------------|-----------------|--------------------|------------------|--------------|-------------------|-------------|---------------------------|--------|--------|-------|-------|----------|---------|----------|
|                    |          | CD34-CD38 | 4-CD38low | CD34-CD38 | CD34-CD38 | 4-CD38low | CD34-CD38 |       | CD34-CD38 | 4-CD38low |            |             |              |            |               |              |            |                 |                    |                  |              |                   |             |                           |        |        |       |       |          |         |          |
| CBF-AML t(8;21)    | 0.35     | 1         | 0.99      | 1.17      | 1.1       | 0.36      | 0         | 0.96  | 0.86      | 0.71      | 0.7        | 0.81        | 0            | 0.23       | 0.2           | 0.04         | 0.97       | 1.49            | 1.84               | 0.32             | 0.24         | 1.05              | 0.51        | 0.74                      | 0.26   | 0.96   | 0.18  | -0.17 |          |         |          |
| CBF-AML t(8;21)    | 1.54     | 2.33      | 2.32      | 2.27      | 2.65      | 1.79      | 1.47      | 2.53  | 2.39      | 1.47      | 2          | 0.82        | 0.91         | 0.81       | 0.63          | 0.45         | 3.79       | 1.72            | 2.09               | 1.67             | 0.39         | 1.7               | 0.66        | 1.48                      | 2.4    | 0.76   | 0.3   | 5.49  |          |         |          |
| CBF-AML t(8;21)    | 1.97     | 2.67      | 2.57      | 3.13      | 3.36      | 2.01      | 0.9       | 3.82  | 3.88      | 3.07      | 2.51       | 1.36        | 3.05         | 0.82       | 0.53          | 0.24         | 0.61       | 1.98            | 2.1                | 2.45             | 0.53         | 3.14              | 0.48        | 1.93                      | 0.67   | 1.34   | 0.15  | 0.91  |          |         |          |
| CBF-AML inv(16)    | 1.7      | 1.98      | 1.82      | 2.18      | 1.72      | 1         | 0.53      | 2.04  | 2.19      | 1.72      | 1.31       | 1.03        | 1.92         | 1.51       | 0.85          | 0.39         | 1.84       | 2.39            | 3.32               | 2.33             | 0.53         | 2.11              | 0.81        | 1.98                      | 0.92   | 0.42   | 0.61  | 1.07  |          |         |          |
| CBF-AML inv(16)    | 2.83     | 3.18      | 3.06      | 3.65      | 3.34      | 2.18      | 1.02      | 4.16  | 3.38      | 2.12      | 1.66       | 1.03        | 2.82         | 1.62       | 0.64          | 0.35         | 0.76       | 1.11            | 1.61               | 3.94             | 0.56         | 2.03              | 0.34        | 2.07                      | 1.52   | 1.33   | 0.07  | 3.26  |          |         |          |
| APL t(15;17)       | 1.34     | 0.9       | 0.66      | 1.12      | 1.51      | 1.48      | 0.89      | 1.37  | 0.94      | 0.82      | 0.73       | 1.3         | 1.34         | 1.45       | 0.15          | 0.34         | 1.93       | 1.4             | 1.59               | 1.77             | 0.36         | 1.93              | 0.37        | 1.3                       | 0.34   | 1.25   | 0.21  | 1.77  |          |         |          |
| APL t(15;17)       | 2.53     | 2.39      | 2.08      | 2.41      | 2.67      | 2.78      | 2.54      | 2.4   | 1.77      | 1.69      | 0.84       | 2.97        | 2.45         | 2.87       | 0.41          | 0.26         | 1.44       | 2.11            | 3.38               | 3.18             | 0.45         | 2.43              | 0.61        | 0.72                      | 0.31   | 2.58   | 0.71  | X     |          |         |          |
| APL t(15;17)       | 0.92     | 1.35      | 1.01      | 1.56      | 1.71      | 1.48      | 1.06      | 1.55  | 1.4       | 1         | 0.83       | 1.92        | 1.32         | 0.71       | 0.33          | 0.35         | 0.96       | 1.82            | 2.26               | 2.14             | 0.58         | 2.01              | 0.57        | 2.42                      | 0.47   | 1.47   | 0.45  | 0.71  |          |         |          |
| FLT3-ITD+ NK-AML   | 3.13     | 2.4       | 1.98      | 2.47      | 2.36      | 2.83      | 2.27      | 3.37  | 3.48      | 2.95      | 1.69       | 3.4         | 2.8          | 2.87       | 0.79          | 0.12         | 0.84       | 1.92            | 3.5                | 3.78             | 0.85         | 2                 | 0.92        | 2.81                      | 1      | 1.32   | 0.97  | 0.96  |          |         |          |
| FLT3-ITD+ NK-AML   | 1.34     | 1.24      | 0.83      | 1.36      | 1.32      | 0.99      | 0.82      | 1.88  | 2.15      | 1.49      | 1.26       | 1.28        | 1.62         | 1.01       | 0.53          | 0.3          | 1.02       | 1.31            | 2.05               | 1.73             | 0.74         | 3.05              | 0.49        | 1.34                      | 0.62   | 1.09   | 0.52  | 1.11  |          |         |          |
| FLT3-ITD+ NK-AML   | 1.42     | 1.57      | 1.19      | 1.62      | 1.67      | 1.58      | 1.08      | 1.92  | 2.31      | 1.4       | 0.6        | 2.27        | 1.93         | 1.55       | 0.37          | 0.35         | 1.8        | 1.39            | 2.41               | 0.94             | 0.89         | 2.22              | 0.37        | 0.35                      | 0.71   | 1.93   | 0.23  | -0.05 |          |         |          |
| FLT3-ITD+ NK-AML   | 2.14     | 1.68      | 1.52      | 1.72      | 1.98      | 1.5       | 0.97      | 2.65  | 2.52      | 1.75      | 1.44       | 1.28        | 1.79         | 1.23       | 0.36          | 0.28         | 0.86       | 0.98            | 1.46               | 2.87             | 0.35         | 2.63              | 0.41        | 1.6                       | 0.71   | 1.63   | 0.27  | 2.02  |          |         |          |
| FLT3-ITD+ NK-AML   | 1.01     | 1.24      | 1.06      | 1.24      | 1.28      | 1.6       | 1.06      | 1.67  | 1.51      | 1.35      | 0.96       | 1           | 1.43         | 0.95       | 0.22          | 0.11         | 0.71       | 1.51            | 2.07               | 2.05             | 0.24         | 2.37              | 0.44        | 0.69                      | 0.51   | 1.41   | 0.05  | 0.17  |          |         |          |
| FLT3-ITD+ NK-AML   | 1.26     | 1.24      | 0.62      | 1.33      | 1.42      | 1.43      | 1.05      | 2.09  | 1.86      | 1.53      | 1.22       | 1.44        | 1.24         | 0.69       | 0.43          | 1.4          | 1.24       | 1.39            | 1.09               | 0.23             | 1.79         | 0.35              | 1.19        | 0.75                      | 0.84   | 0.56   | 0.46  |       |          |         |          |
| FLT3-ITD+ NK-AML   | 1.46     | 1.99      | 1.79      | 2.13      | 1.84      | 1.45      | 0.37      | 2.18  | 2.01      | 1.7       | 1.46       | 0.97        | 1.71         | 0.75       | 0.64          | 0.58         | 3.07       | 1.97            | 2.37               | 0.58             | 0.6          | 0.53              | 0.44        | 1.56                      | 1.04   | 1.14   | 0.18  | X     |          |         |          |
| FLT3-ITD+ NK-AML   | 0.85     | 1.26      | 0.84      | 1.36      | 0.99      | 1.45      | 0.56      | 1.61  | 2.02      | 1.55      | 1.33       | 0.6         | 1            | 0.59       | 0.64          | 0.55         | 1.86       | 1.88            | 2.2                | 2.33             | 0.76         | 2.28              | 0.37        | 1.78                      | 0.46   | 0.61   | 0.34  | 1.4   |          |         |          |
| FLT3-ITD+ NK-AML   | 1.36     | 1.46      | 1.34      | 1.62      | 2.37      | 1.46      | 1.43      | 1.5   | 1.66      | 1.13      | 0.86       | 1.39        | 1.43         | 0.85       | 0.46          | 0.23         | 1.11       | 1.22            | 2.58               | 0.48             | 0.37         | 1.88              | 0.47        | 0.52                      | 0.61   | 1.55   | 0.61  | 0.75  |          |         |          |
| FLT3-ITD+ NK-AML   | 1.73     | 2.17      | 0.74      | 2.25      | 0.76      | 1.63      | 0.67      | 2.67  | 3.21      | 2         | 1.23       | 0.77        | 1.77         | 0.83       | 0.55          | 0.45         | 0.76       | 1.37            | 1.92               | 1.68             | 0.67         | 1.94              | 0.34        | 2.26                      | 0.68   | 0.51   | 2.05  | 1.23  |          |         |          |
| FLT3-ITD+ NK-AML   | 1.02     | 1.65      | 1.44      | 2.12      | 2.26      | 1.67      | 0.47      | 2.82  | 3.68      | 1.59      | 1.23       | 1.54        | 1.48         | 0.83       | 0.31          | 0.51         | 1.42       | 1.41            | 1.95               | 1.78             | 1.2          | 1.96              | 0.35        | 1.35                      | 1.4    | 0.58   | 0.26  | -0.08 |          |         |          |
| FLT3-ITD+ NK-AML   | 1.76     | 1.38      | 1.16      | 1.42      | 1.47      | 1.43      | 1.2       | 1.9   | 1.94      | 1.49      | 1.86       | 1           | 1.72         | 1.97       | 0.43          | 0.2          | 0.74       | 2.45            | 4.66               | 2.5              | 0.49         | 2.07              | 0.36        | 0.95                      | 1.09   | 0.21   | 0.44  | 0.62  |          |         |          |
| FLT3-ITD+ NK-AML   | 1.12     | 1.24      | 1.09      | 1.47      | 1.01      | 0.88      | 0.79      | 1.24  | 1.48      | 1.59      | 1.17       | 1.04        | 1.43         | 0.95       | 0.74          | 0.65         | 2.29       | 2.53            | 2.99               | 1.95             | 0.32         | 1.95              | 0.44        | 0.87                      | 0.73   | 0.75   | 0.34  | 1.24  |          |         |          |
| FLT3-ITD+ NK-AML   | 0.75     | 1.96      | 1.81      | 2.28      | 1.78      | 1.52      | -0.21     | 2.64  | 2.22      | 1.71      | 1.65       | 1.03        | 1.01         | 0.5        | 0.37          | 0.47         | 1.41       | 1.31            | 4.34               | 2.02             | 0.92         | 2.47              | 0.38        | 0.62                      | 0.43   | 0.79   | 0.35  | 2.25  |          |         |          |
| FLT3wt NK-AML      | 0.2      | 0.84      | 0.66      | 1.17      | 0.9       | 0.39      | 0.01      | 0.97  | 1.56      | 0.26      | 0.25       | 0           | 0.44         | 0.42       | 0             | 0.17         | 0.43       | 1.91            | 2.16               | 1.38             | 0.52         | 0.57              | 0.32        | 1.56                      | -0.07  | 2.21   | 0.13  | -0.11 |          |         |          |
| FLT3wt NK-AML      | 0.59     | 0.89      | 0.81      | 0.9       | 1         | 0.74      | -0.07     | 1.3   | 1.42      | 0.56      | 0.56       | 0.23        | 0.58         | 0.42       | 0.25          | 0.24         | 0.62       | 1.03            | 1.51               | 0.32             | 0.48         | 1.29              | 0.37        | 1                         | 0.3    | 0.09   | 0.16  | 0.51  |          |         |          |
| FLT3wt NK-AML      | -0.15    | 0.76      | 0.24      | 2.08      | 0.44      | -0.09     | -0.22     | 0.5   | 0.57      | 0.07      | -0.04      | -0.17       | -0.04        | -0.12      | -0.19         | -0.21        | 0.2        | 0.88            | 1.21               | 0.79             | -0.1         | -0.02             | -0.08       | -0.09                     | X      | 0.85   | -0.17 | -0.13 |          |         |          |
| FLT3wt NK-AML      | 0.25     | 0.41      | 0.27      | 1.64      | 0.68      | 0.23      | -0.02     | 0.97  | 1.68      | 0.89      | 0.54       | 0.25        | 0.24         | 0.28       | -0.1          | -0.12        | 0.41       | 1.71            | 1.81               | 0.79             | 0.21         | 0.36              | 0.1         | 0.21                      | -0.11  | -0.01  | -0.08 | -0.26 |          |         |          |
| FLT3wt NK-AML      | 0.21     | 0.42      | 0.38      | 0.94      | 0.53      | 0.09      | -0.19     | -0.01 | 0.49      | 0         | 0.37       | 0.06        | 0.41         | -0.12      | -0.05         | 0.02         | 0.59       | 0.87            | 0.92               | 0.47             | 0.28         | 1.12              | 0.24        | 0.65                      | 0.49   | 0.04   | -0.02 | 0.45  |          |         |          |
| FLT3wt NK-AML      | 0.51     | 0.61      | 0.49      | 0.89      | 0.47      | 0.36      | 0.26      | 0.8   | 1.27      | 0.74      | 0.48       | 0.65        | 0.89         | 1.11       | -0.01         | 0.05         | 0.96       | 1.89            | 2.08               | 2.85             | 0.45         | 1.08              | 0.33        | -0.03                     | -0.28  | 0.34   | 0.04  | -0.02 |          |         |          |
| MLL t(10;11)       | 1.93     | 2.61      | 1.96      | 2.8       | 1.9       | 1.67      | 1.67      | 2.51  | 2.83      | 2.38      | 2.06       | 0.97        | 1.6          | 0.62       | 0.42          | 0.19         | 1.24       | 1.37            | 1.77               | 2.74             | 0.65         | 1.94              | 0.47        | 2.09                      | 1.92   | 0.64   | 0.24  | 1.92  |          |         |          |
| MLL t(10;11)       | 2.78     | 2.08      | 1.81      | 2.2       | 2.57      | 2.01      | 0.4       | 3.16  | 3.5       | 2.36      | 0.94       | 1.92        | 2.45         | 1.96       | 0.3           | 0.07         | 2.1        | 2.47            | 2.87               | 0.83             | 0.84         | 2.31              | 0.94        | 2.56                      | 0.97   | 0.63   | 0.46  | 1     |          |         |          |
| MLL t(10;11)       | 1.28     | 1.41      | 1.04      | 1.74      | 1.14      | 0.92      | 0.41      | 1.94  | 1.93      | 1.73      | 1.32       | 0.95        | 2.15         | 1.83       | 0.79          | 0.39         | 1.39       | 1.58            | 3.19               | 2.54             | 0.96         | 1.91              | 0.44        | 1.1                       | 1.27   | 0.67   | 2.99  | 1.8   |          |         |          |
| MLL t(10;11)       | 1.22     | 1.31      | 0.86      | 1.59      | 0.95      | 0.55      | 0.37      | 1.72  | 2.68      | 2.55      | 1.8        | 1.83        | 2.11         | 1.64       | 0.79          | 0.31         | 1.08       | 1.22            | 2.06               | 0.78             | 0.37         | 1.57              | 0.32        | 1.12                      | 0.06   | 2.9    | 0.11  | 0.04  |          |         |          |
| ADK-AML Cmplx/Mono | 0.36     | 1.26      | 0.98      | 2.16      | 1.16      | 0.44      | -0.06     | 0.22  | 0.41      | 0.41      | 0.41       | 0.18        | 0.58         | 0.3        | 0.17          | 0.08         | 0.64       | 0.87            | 1.44               | 2.59             | 0.45         | 1.04              | 0.44        | 0.66                      | -0.11  | 0.06   | 0.03  | -0.02 |          |         |          |
| ADK-AML Cmplx/Mono | 1.01     | 1.59      | 1.33      | 2.63      | 1.46      | 0.36      | -0.13     | 1.87  | 2.49      | 1.02      | 0.8        | 0.55        | 1.1          | 0.88       | 0.47          | 0.07         | 1.08       | 1.54            | 2.81               | 1.71             | 0.41         | 2.22              | 0.34        | 0.69                      | 0.46   | 0.72   | 0.16  | 0.81  |          |         |          |
| ADK-AML Cmplx/Mono | 0.38     | 1.01      | 1.15      | 0.56      | 1.65      | 0.97      | 0         | 1.37  | 1.7       | 0.71      | 0.6        | 0.36        | 0.63         | 0.29       | 0.12          | 0.21         | 0.7        | 1.36            | 1.52               | 2.54             | 0.6          | 1.49              | 0.34        | 1.1                       | -0.02  | 0.17   | 0.06  | -0.06 |          |         |          |
| Healthy Donors     | 0.44     | 1.3       | 1.33      | 1.36      | 1.52      | 0.74      | 0.08      | 1.49  | 1.52      | 0.97      | 1.01       | 0.36        | 0.7          | 0.6        | 0.36          | 0.31         | 0.85       | 1.76            | 1.95               | 0.46             | 0.39         | 1.14              | 0.59        | 1.26                      | 0.52   | 0      | 0.3   | 0.99  |          |         |          |
| Healthy Donors     | 0.71     | 1.97      | 1.96      | 1.95      | 2.24      | 1.61      | 0.58      | 1.94  | 1.61      | 1.28      | 0.98       | 0.87        | 0.98         | 0.8        | 0.64          | 0.55         | 1.37       | 1.99            | 2.49               | 0.84             | 0.52         | 1.81              | 0.66        | 1.63                      | 0.55   | 0.43   | 0.55  | 1.12  |          |         |          |
| Healthy Donors     | 0.71     | 1.96      | 1.75      | 2.37      | 2.07      | 1.65      | 0.45      | 1.91  | 1.82      | 1.29      | 1          | 0.85        | 1            | 0.83       | 0.54          | 0.46         | 0.9        | 1.7             | 2.27               | 0.79             | 0.68         | 2.11              | 0.71        | 1.45                      | 0.73   | 0.82   | 0.38  | 0.62  |          |         |          |
| Healthy Donors     | 0.51     | 1.71      | 1.57      | 1.94      | 1.88      | 1.23      | 0.75      | 1.88  | 1.55      | 1         | 0.97       | 0.72        | 0.81         | 0.62       | 0.35          | 0.28         | 1.26       | 1.78            | 1.97               | 0.83             | 0.52         | 1.7               | 0.75        | 1.07                      | 0.61   | 0.29   | 0.45  | 0.04  |          |         |          |
| Healthy Donors     | 0.41     | 1.35      | 1.32      | 1.54      | 1.79      | 1.09      | 0.63      | 1.67  | 1.32      | 1.01      | 0.79       | 0.48        | 0.66         | 0.47       | 0.29          | 0.25         | 1          | 1.23            | 1.43               | 0.57             | 0.38         | 1.49              | 0.51        | 0.99                      | 0.48   | 0      | 0.22  | 0.34  |          |         |          |
| Healthy Donors     | 0.61     | 1.77      | 1.73      | 1.8       | 1.95      | 1.49      | 0.56      | 1.83  | 1.38      | 1.15      | 1.01       | 0.7         | 0.99         | 0.67       | 0.56          | 0.51         | 0.99       | 1.39            | 1.7                | 0.62             | 0.35         | 1.79              | 0.43        | 1.34                      | 0.49   | 0.53   | 0.19  | 1.48  |          |         |          |
| Healthy Donors     | 0.55     | 1.78      | 1.74      | 2.15      | 2.18      | 1.44      | 0.66      | 1.82  | 1.46      | 1.02      | 0.9        | 0.65        | 0.93         | 0.6        | 0.48          | 0.44         | 0.77       | 1.3             | 1.42               | 0.54             | 0.5          | 1.77              | 0.44        | 1.36                      | 0.56   | 0.57   | 0.3   | 1.05  |          |         |          |
| Healthy Donors     | 0.61     | 2.02      | 1.87      | 2.13      | 2.22      | 1.38      | 0.87      | 2.13  | 1.68      | 1.41      | 1.19       | 0.78        | 0.88         | 0.54       | 0.46          | 0.44         | 1.4        | 1.72            | 1.79               | 0.78             | 0.58         | 2.27              | 0.7         | 1.44                      | 0.89   | 0.22   | 0.44  | 0.37  |          |         |          |
| Healthy Donors     | 0.82     | 2.54      | 2.35      | 3.18      | 2.65      | 1.91      | 0.98      | 2.43  | 2.01      | 1.55      | 1.37       | 0.96        | 1.34         | 0.77       | 0.75          | 0.74         | 1.32       | 1.75            | 2                  | 0.75             | 0.77         |                   |             |                           |        |        |       |       |          |         |          |

H3Kac9 Median

|                  | CD34+CD38 <sup>low</sup> | HSC/MPP-4 <sup>CD38low</sup> | CD34 <sup>low</sup> CD38 <sup>low</sup> CD33 <sup>low</sup> | CD34 <sup>low</sup> CD38 <sup>low</sup> CD33 <sup>low</sup> CD38 <sup>low</sup> | GMP    | 34negCD38 <sup>low</sup> +Undiff | 34neg38negUndiff | Myelo/Mono blast | ProMonocyte | CD14neg Mono | CD14+ Mono | 11b+DRneg Mono | ProMyelocyte | Myelocytes | Meta-myelocytes | Mature Granulocyte | Pro-erythroblast | Erythroblast | Late Erythroblast | Pre-B Cells | Mature B cells CD20+CD19+ | Plasma | T Cell | pDC    | mDC    | Basophil | NK Cell | Platelet |      |
|------------------|--------------------------|------------------------------|-------------------------------------------------------------|---------------------------------------------------------------------------------|--------|----------------------------------|------------------|------------------|-------------|--------------|------------|----------------|--------------|------------|-----------------|--------------------|------------------|--------------|-------------------|-------------|---------------------------|--------|--------|--------|--------|----------|---------|----------|------|
| CBF-AML (8,21)   | 120.45                   | 203.08                       | 483.43                                                      | 191.5                                                                           | 198.6  | 109.7                            | 78.88            | 164.96           | 167.03      | 197.93       | 215.48     | 93.07          | 29.44        | 87.36      | 109.98          | 83.47              | 288.91           | 166.73       | 102.15            | 226.73      | 173.93                    | 220.84 | 281.76 | 139.07 | 139.57 | 88.37    | 174.76  | -0.81    |      |
| CBF-AML inv(16)  | 247.69                   | 378.83                       | 383.41                                                      | 335.51                                                                          | 387.27 | 318.06                           | 310.51           | 319.38           | 287.92      | 196.6        | 241.14     | 143.33         | 135.68       | 128.1      | 121.76          | 94.29              | 706.46           | 181.94       | 258.69            | 314.65      | 181.08                    | 388.67 | 252    | 233.21 | 152.87 | 131.15   | 200.69  | 219.32   |      |
| CBF-AML inv(16)  | 181.12                   | 296.17                       | 301.1                                                       | 279.79                                                                          | 330.98 | 287.07                           | 190.39           | 271.85           | 236.22      | 175.67       | 127.75     | 169.81         | 292.04       | 146.51     | 63.68           | 28.58              | 425.78           | 34.83        | 14.71             | 224.64      | 96.32                     | 164.98 | 82.43  | 165.59 | 45.23  | 51.06    | 55.37   | 2.33     |      |
| APL t(15;17)     | 288.74                   | 335.44                       | 335.07                                                      | 333.48                                                                          | 328.63 | 214.83                           | 147.52           | 332.64           | 327.17      | 270.64       | 205.35     | 150.35         | 329.36       | 276.88     | 161.22          | 87.2               | 708.24           | 296.01       | 78.52             | 297.68      | 153.09                    | 240.71 | 208.76 | 417.96 | 147.3  | 71.38    | 189.14  | 0.02     |      |
| APL t(15;17)     | 323.6                    | 346.5                        | 350.51                                                      | 331.26                                                                          | 374.07 | 307.71                           | 290.81           | 366.72           | 281.4       | 189.63       | 127.33     | 48.36          | 348.13       | 242.5      | 86.38           | 59.78              | 473.33           | 37.25        | 1.88              | 351.81      | 113.37                    | 219.58 | 62.18  | 389.52 | 110.81 | 52.55    | 51.29   | 387.25   |      |
| APL t(15;17)     | 353.09                   | 170.04                       | 158.96                                                      | 207.95                                                                          | 398.96 | 421.54                           | 241.14           | 257.69           | 60.86       | 92.37        | 207.83     | 212.22         | 324.62       | 331.88     | 81.14           | 88.68              | 736              | 351.79       | 523.25            | 585.35      | 171.28                    | 608.05 | 136.34 | 173.6  | 107.66 | 217.31   | 105.82  | 257.2    |      |
| APL t(15;17)     | 523.15                   | 475.45                       | 564.36                                                      | 463.04                                                                          | 690.08 | 762.46                           | 653.37           | 490.12           | 251.89      | 247.24       | 209.81     | 553.07         | 499.66       | 533.71     | 82.98           | 59.37              | 711.31           | 506.3        | 699.66            | 617.44      | 168.91                    | 191.31 | 180.93 | 347.64 | 120.62 | 429.6    | 235.16  | X        |      |
| APL t(15;17)     | 252.77                   | 274.2                        | 257.97                                                      | 293.68                                                                          | 464.43 | 472.05                           | 335.21           | 380.62           | 375.18      | 174.61       | 149.43     | 427.31         | 333.93       | 102.77     | 38.91           | 32.8               | 488.36           | 144.69       | 16.2              | 557.95      | 232.64                    | 738.69 | 202.77 | 573.58 | 141.33 | 269.13   | 188.98  | 149.36   |      |
| FLT3-ITD+ NK-AML | 731.09                   | 567.86                       | 604.11                                                      | 556.92                                                                          | 755.27 | 377.43                           | 663.85           | 798.58           | 708.4       | 653.53       | 251.96     | 746.3          | 596.45       | 614.35     | 131.14          | 78.72              | 494.32           | 251.41       | 15.67             | 707.45      | 262.67                    | 233.16 | 319.44 | 732.36 | 167.55 | 734.88   | 410.71  | 19.42    |      |
| FLT3-ITD+ NK-AML | 382.71                   | 352.02                       | 340.25                                                      | 355.35                                                                          | 450.57 | 349.1                            | 183.96           | 405.86           | 410.36      | 271.59       | 207.41     | 197.69         | 341.71       | 176.44     | 116.64          | 74.09              | 432.6            | 122.07       | 87.98             | 356.65      | 215.09                    | 376.85 | 149.73 | 502.92 | 161.43 | 120.86   | 189.42  | 1.24     |      |
| FLT3-ITD+ NK-AML | 252.57                   | 260.64                       | 293.46                                                      | 256.78                                                                          | 375.94 | 283.22                           | 332.17           | 359.48           | 199.22      | 127.56       | 160.91     | 367.64         | 332.64       | 283.26     | 76.85           | 67.76              | 505.85           | 65.04        | 16.43             | 197.95      | 166.78                    | 360.51 | 78.9   | 631.28 | 84.3   | 229.4    | 82.2    | 0.47     |      |
| FLT3-ITD+ NK-AML | 333.9                    | 301.31                       | 327.42                                                      | 295.96                                                                          | 357.38 | 311.7                            | 218.18           | 381.96           | 348.19      | 184.69       | 150.27     | 181.19         | 276.72       | 234.99     | 135.97          | 94.73              | 454.54           | 83.7         | 16.52             | 261.5       | 118.34                    | 209.7  | 93     | 399.85 | 86.12  | 80.53    | 71.43   | 1.7      |      |
| FLT3-ITD+ NK-AML | 134.1                    | 230.74                       | 253.8                                                       | 226.95                                                                          | 301.97 | 381.83                           | 286.29           | 318.89           | 275.17      | 154.22       | 102.25     | 148.48         | 322.14       | 188.83     | 49.84           | 29.04              | 258.99           | 133.61       | 58.8              | 347.19      | 110.14                    | 194.72 | 138.46 | 309.87 | 84.22  | 88.2     | 109.83  | 1.09     |      |
| FLT3-ITD+ NK-AML | 268.39                   | 411.2                        | 221.95                                                      | 421.99                                                                          | 520.67 | 441.5                            | 369.26           | 534.75           | 454.65      | 330.17       | 242.76     | 299.96         | 299.39       | 235.2      | 131.87          | 59.73              | 511.5            | 157.48       | 107.38            | 339.79      | 150.01                    | 370.22 | 168.78 | 497.36 | 260.28 | 114.95   | 196.51  | 1.39     |      |
| FLT3-ITD+ NK-AML | 72.36                    | 141.9                        | 97.86                                                       | 158.73                                                                          | 191.81 | 346.05                           | 59.48            | 282.11           | 124.89      | 68.76        | 52.44      | 62.28          | 306.36       | 95.06      | 87.54           | 63.28              | 360.12           | 20.21        | 5.77              | 295.4       | 71.73                     | 393.3  | 77.16  | 276.91 | 71.41  | 140.37   | 50.96   | X        |      |
| FLT3-ITD+ NK-AML | 32.75                    | 131.34                       | 123.1                                                       | 132.74                                                                          | 135.1  | 172.8                            | 80.4             | 170.93           | 205.35      | 117.55       | 91.79      | 8.68           | 22.37        | 11.03      | 15.29           | 14.5               | 369.5            | 23.92        | 4.64              | 239.63      | 80.14                     | 135.37 | 49.7   | 286.44 | 53.89  | 18.78    | 49.11   | 0.71     |      |
| FLT3-ITD+ NK-AML | 232.56                   | 207.89                       | 210.73                                                      | 201.98                                                                          | 287.53 | 296.12                           | 246.42           | 235.92           | 234.3       | 109.69       | 83.99      | 251.21         | 251.8        | 117.85     | 87.52           | 48.02              | 343.41           | 152.36       | 177.32            | 50.25       | 100.41                    | 339.88 | 171.7  | 190.75 | 126.44 | 361.92   | 196.94  | 0.04     |      |
| FLT3-ITD+ NK-AML | 178.83                   | 293.13                       | 209.22                                                      | 294.95                                                                          | 196.57 | 320.71                           | 146.45           | 450.57           | 452.17      | 240.08       | 163.63     | 71.01          | 265.8        | 87.38      | 63.9            | 31.58              | 256.4            | 193.63       | 4.33              | 382.06      | 121.14                    | 193.88 | 100.18 | 490.58 | 117.46 | 69.4     | 353.06  | 11.28    |      |
| FLT3-ITD+ NK-AML | 426                      | 609.3                        | 624.42                                                      | 549.75                                                                          | 786.64 | 703.38                           | 457.79           | 730.24           | 756.54      | 202.5        | 126.43     | 434.34         | 616.02       | 134.01     | 81.82           | 63.91              | 446.19           | 29.21        | 5.18              | 553.31      | 302.36                    | 284.05 | 153.09 | 604.44 | 49.94  | 48.76    | 136.65  | -0.1     |      |
| FLT3-TKD+ NK-AML | 238.1                    | 224.84                       | 234.58                                                      | 219.62                                                                          | 235.99 | 237.89                           | 206.73           | 237.71           | 253.16      | 168.62       | 215.67     | 127.56         | 220.55       | 248.38     | 86.86           | 82.12              | 472.99           | 254.56       | 157.97            | 299.2       | 98.9                      | 284.01 | 70.09  | 229.15 | 86.47  | 49.07    | 70.76   | 0.65     |      |
| FLT3-TKD+ NK-AML | 82.89                    | 113.54                       | 108.22                                                      | 129.98                                                                          | 86.32  | 84.34                            | 124.85           | 115.18           | 105.78      | 83.67        | 48.84      | 52.42          | 97.85        | 26.82      | 34.2            | 15.95              | 360.99           | 211.88       | 8.67              | 102.78      | 45.18                     | 241.02 | 53.98  | 211.33 | 37.13  | 29.15    | 43.75   | 0.27     |      |
| FLT3-TKD+ NK-AML | 62.78                    | 222.26                       | 222.26                                                      | 195.6                                                                           | 251.76 | 410.69                           | -0.14            | 410.71           | 284.23      | 158.57       | 130.55     | 146.97         | 206.13       | 89.05      | 58.39           | 55.61              | 408.19           | 78.65        | 0.57              | 307.7       | 92.14                     | 276.16 | 86.71  | 233.12 | 56.53  | 15.42    | 87.9    | 0.47     |      |
| FLT3wt NK-AML    | 117.11                   | 228.72                       | 226.79                                                      | 225.83                                                                          | 245.83 | 365.91                           | 241.31           | 281.51           | 302.14      | 165.95       | 135.68     | 130.81         | 225.05       | 125.78     | 58.11           | 56.79              | 433.83           | 250.11       | 22.88             | 209.62      | 249.04                    | 187.75 | 213.15 | 417.27 | 73.74  | 187.32   | 185.48  | 0.12     |      |
| FLT3wt NK-AML    | 68.51                    | 147.78                       | 150.95                                                      | 138.97                                                                          | 174.05 | 138.42                           | 22.78            | 172.09           | 166.09      | 98.91        | 80.63      | 33.73          | 86.55        | 58.48      | 41.63           | 33.98              | 127.73           | 50.63        | 32.88             | 85.46       | 107.05                    | 140.42 | 124.63 | 226.05 | 72.92  | 18.46    | 91.85   | 0.39     |      |
| FLT3wt NK-AML    | 30.47                    | 112.4                        | 82.58                                                       | 263.86                                                                          | 71.74  | 60.84                            | 30.77            | 62.96            | 41.74       | 22.72        | 22.04      | 23.32          | 77.01        | 36.17      | 77.01           | 36.17              | 193.28           | 50.42        | 29.36             | 33.7        | 29.87                     | X      | 5.85   | 31.86  | 0.37   | X        | 5.85    | 31.86    | 0.37 |
| FLT3wt NK-AML    | 111.18                   | 335.28                       | 331.11                                                      | 335.81                                                                          | 341.87 | 266.07                           | 148.98           | 264.73           | 307.11      | 150.67       | 119.47     | 66.17          | 168.75       | 127.69     | 43.62           | 28.22              | 382.08           | 215.11       | 27.2              | 398.27      | 193.37                    | 154.98 | 117.32 | 83.05  | 78.03  | 35.62    | 90.52   | -0.01    |      |
| FLT3wt NK-AML    | 102.43                   | 146.5                        | 145.15                                                      | 172.12                                                                          | 148.72 | 159.24                           | 75.85            | 110.44           | 133.85      | 135.96       | 108.48     | 87.98          | 150.68       | 40.94      | 39.49           | 40.07              | 319.81           | 72.72        | 8.46              | 185.27      | 142.29                    | 402.8  | 111.46 | 253.52 | 90.89  | 1.19     | 94.91   | 1.06     |      |
| FLT3wt NK-AML    | 261.81                   | 372.85                       | 352.84                                                      | 390.75                                                                          | 391.68 | 327                              | 231              | 341.23           | 419.94      | 311.37       | 175.66     | 241.11         | 322.61       | 381.86     | 47.59           | 51.74              | 534.34           | 118.31       | 4.75              | 433.35      | 189.8                     | 416.04 | 128.58 | 77.54  | 18.9   | 108.85   | -0.09   | -0.09    |      |
| MLL t(10;11)     | 348.77                   | 489.44                       | 522.35                                                      | 483.06                                                                          | 496.29 | 438.3                            | 405.16           | 388.73           | 244.24      | 148.83       | 129.35     | 125.88         | 323.33       | 139.62     | 95.28           | 71.32              | 510.15           | 131.12       | 5.18              | 359.35      | 162.05                    | 168.68 | 127.69 | 384.3  | 130.4  | 8.26     | 131.37  | 0.79     |      |
| ADK-AML          | 529.22                   | 388.41                       | 353.99                                                      | 397.58                                                                          | 570.76 | 482.96                           | 58.19            | 581.77           | 576.7       | 523.23       | 154.53     | 392.12         | 437.74       | 382.36     | 91.98           | 51.04              | 570.36           | 244.58       | 26.01             | 248.3       | 205.53                    | 101.23 | 223.03 | 553.08 | 139.43 | 34.92    | 231.8   | 1.24     |      |
| ADK-AML          | 348.09                   | 381.35                       | 391.07                                                      | 365.78                                                                          | 399.25 | 164.62                           | 172.46           | 378.14           | 386.78      | 292.96       | 175        | 145.73         | 483.02       | 414.77     | 165.76          | 77.93              | 431.75           | 202.66       | 5.23              | 223.21      | 225.92                    | 414.69 | 122.24 | 300.68 | 143.17 | 93.66    | 135.5   | 0.55     |      |
| ADK-AML          | 205.47                   | 198.94                       | 198.94                                                      | 182.41                                                                          | 266.81 | 211.99                           | 143.59           | 267.7            | 289.53      | 147.5        | 134.56     | 253.35         | 275.52       | 288.67     | 203.4           | 61.27              | 395.7            | 82.95        | 10.39             | 209.64      | 92.66                     | 300.81 | 76.59  | 330.68 | 106.07 | 534.64   | 76.83   | 0.04     |      |
| ADK-AML          | 187.65                   | 727.22                       | 706.51                                                      | 747.02                                                                          | 613.5  | 472.5                            | 152.59           | 272.83           | 192.14      | 193.84       | 163.96     | 126.61         | 318.28       | 148.01     | 147.93          | 86.66              | 762.9            | 207.62       | 4.05              | 508.6       | 391.33                    | 547.1  | 226.55 | 525.47 | 161.44 | 242.33   | 231.55  | 0.6      |      |
| ADK-AML          | 198.17                   | 282.35                       | 284                                                         | 272.87                                                                          | 329.42 | 273.77                           | 92.8             | 295              | 271.69      | 127.26       | 75.57      | 84.69          | 315.41       | 230.35     | 96.79           | 31.95              | 341.4            | 261.15       | 5                 | 204.92      | 65.15                     | 208.49 | 51.85  | 249.22 | 62.45  | 59.88    | 44.99   | 0.51     |      |
| ADK-AML          | 136.51                   | 297.59                       | 332.41                                                      | 109.52                                                                          | 420.37 | 424.68                           | 83.4             | 314.9            | 308.24      | 215.03       | 225.97     | 184.96         | 235.25       | 113.73     | 84.15           | 77.89              | 407.44           | 76.56        | 35.67             | 435.56      | 206.64                    | 357.17 | 188.67 | 270.97 | 148.31 | 70.23    | 145.4   | -0.06    |      |
| Healthy Donors   | 87.32                    | 245.96                       | 273.61                                                      | 206.95                                                                          | 356.12 | 297.71                           | 104.42           | 345.42           | 262.9       | 211.35       | 206.26     | 119.58         | 132.58       | 102.09     | 78.96           | 69.82              | 453.47           | 240.46       | 205.73            | 179.45      | 156.51                    | 264.2  | 246.98 | 413.13 | 151.29 | 46.82    | 177.64  | 0.98     |      |
| Healthy Donors   | 84.82                    | 399.35                       | 398.74                                                      | 353.39                                                                          | 475.1  | 392.06                           | 227.46           | 385.48           | 268.23      | 219.78       | 194.37     | 160.22         | 205.93       | 114.46     | 76.14           | 54.75              | 514.65           | 286.7        | 182.39            | 247.76      | 191.19                    | 219.34 | 239.35 | 446.87 | 159.17 | 29.85    | 188.22  | 0.62     |      |
| Healthy Donors   | 90.29                    | 362.53                       | 354.11                                                      | 347.71                                                                          | 474.48 | 343.99                           | 230.33           | 375.66           | 278.23      | 194.35       | 157.98     | 130.53         | 250.48       | 136.64     | 73.58           | 60.82              | 445.02           |              |                   |             |                           |        |        |        |        |          |         |          |      |

**cMyc Median**

|                  | Ungated | CD34-CD38 <sup>low</sup> | HSC/MPP-4-CD3 <sup>low</sup> | CD34-CD38 <sup>mid</sup> | GMP   | 34negCD38 <sup>undiff</sup> | 34neg38neg <sup>undiff</sup> | Myelo/Mono blast | ProMonocyte | CD14neg Mono | CD14+ Mono | 11b+DRneg Mono | ProMyelocyte | Myelocytes | Meta-myelocytes | Mature Granulocyte | Pro-erythroblast | Erythroblast | Late Erythroblast | Pre-B Cells | Mature B cells CD20+CD19+ | Plasma | T Cell | pDC   | mDC   | Basophil | NK Cell | Platelet |
|------------------|---------|--------------------------|------------------------------|--------------------------|-------|-----------------------------|------------------------------|------------------|-------------|--------------|------------|----------------|--------------|------------|-----------------|--------------------|------------------|--------------|-------------------|-------------|---------------------------|--------|--------|-------|-------|----------|---------|----------|
| CBF-AML t(8;21)  | 0       | 1.3                      | 1.21                         | 1.84                     | 1.55  | 0.05                        | -0.12                        | 1.06             | 0.65        | 0.11         | 0          | 0.01           | 0            | 0          | -0.05           | -0.05              | -0.24            | -0.27        | -0.25             | 0.63        | -0.08                     | 0.36   | -0.15  | 0.33  | 0     | 0        | -0.07   | 0.5      |
| CBF-AML inv(16)  | 0.48    | 0.9                      | 0.88                         | 1.2                      | 1.27  | 0.35                        | 0.28                         | 1.22             | 0.76        | 0.36         | 0.2        | 0.16           | 0.1          | 0.02       | -0.05           | -0.02              | -0.3             | -0.33        | -0.25             | 0.31        | -0.24                     | 0.44   | -0.21  | 0.48  | 0.67  | 0.2      | -0.13   | 0.12     |
| CBF-AML t(15;17) | 0.8     | 1.52                     | 1.36                         | 2.24                     | 1.63  | 0.38                        | -0.1                         | 1.95             | 1.78        | 1.02         | 1.12       | 0.24           | 1.58         | -0.02      | -0.01           | 0.06               | 2.06             | -0.31        | -0.26             | 1.68        | -0.11                     | 1.33   | 0.11   | 1.15  | 1.23  | 0.88     | -0.09   | 0.31     |
| AML t(15;17)     | 0.78    | 1.31                     | 0.97                         | 1.63                     | 0.86  | 0.09                        | -0.05                        | 0.93             | 0.99        | 0.46         | 0.35       | 0.52           | 0.49         | 0.27       | 0               | 0                  | 0.07             | -0.21        | 0.2               | 0.06        | -0.08                     | 0.96   | 0      | 0.12  | 0.43  | 0.36     | 0       | -0.29    |
| AML t(15;17)     | 0.85    | 1.02                     | 0.89                         | 1.32                     | 1.03  | 0.61                        | -0.04                        | 1.29             | 1.6         | 1.25         | 1.13       | 1.15           | 0.76         | 0.51       | 0.11            | -0.01              | -0.09            | -0.34        | -0.38             | 0.7         | -0.13                     | 1.03   | 0.31   | 0.31  | 1.11  | 0.64     | -0.05   | 0.16     |
| AML t(15;17)     | 0.23    | 1.07                     | 0.42                         | 1.96                     | 0.73  | 0.07                        | -0.01                        | 0.68             | 3.07        | 2.09         | 0.06       | 1.03           | 0.12         | 0.47       | -0.13           | -0.11              | -0.17            | -0.34        | -0.34             | -0.1        | -0.25                     | 0.05   | -0.17  | 3.35  | 0.05  | 1.38     | -0.06   | -0.11    |
| AML t(15;17)     | 1.09    | 1.85                     | 0.71                         | 2.05                     | 0.83  | -0.01                       | -0.06                        | 1.28             | 2.94        | 2.51         | 0.62       | 1.55           | 1.23         | 1.28       | -0.05           | 0.03               | 0.13             | -0.31        | -0.16             | 0.37        | -0.26                     | 0.73   | -0.11  | 1.86  | 0.23  | 3.23     | 0.17    | X        |
| AML t(15;17)     | -0.03   | 0.58                     | 0.5                          | 0.86                     | 0.59  | -0.09                       | -0.14                        | 0.04             | 0.18        | 0.05         | 0.07       | 0.25           | -0.02        | 0.03       | 0.15            | 0.23               | -0.11            | -0.34        | -0.32             | 0.18        | -0.26                     | -0.1   | -0.21  | -0.32 | 0.09  | 0.39     | -0.16   | 0.11     |
| AML t(15;17)     | 0.84    | 1.69                     | 0.58                         | 1.95                     | 0.09  | 0.99                        | 0.87                         | 0.55             | 1.49        | 3.15         | 0.78       | 0.54           | 0.47         | 0.73       | 0               | 0                  | -0.13            | -0.28        | -0.29             | 0           | -0.09                     | 0.39   | -0.08  | 3.33  | 0.37  | 1.58     | 0       | 0.21     |
| AML t(15;17)     | 0.46    | 0.58                     | 0.35                         | 1.04                     | 0.51  | 0.01                        | 0.13                         | 1.05             | 1.45        | 1.13         | 1.01       | 0.38           | 0.35         | 0.01       | -0.11           | -0.09              | 0.41             | -0.3         | -0.28             | 1.46        | -0.13                     | 0.67   | 0.07   | 0.3   | 0.35  | 0.19     | -0.08   | -0.46    |
| AML t(15;17)     | 0.75    | 1.22                     | 0.58                         | 1.3                      | 0.57  | 0.39                        | 0.35                         | 0.75             | 1.12        | 0.53         | 0.68       | 0.95           | 0.19         | 0.23       | -0.02           | 0.03               | 0.32             | -0.3         | -0.33             | 0.12        | -0.05                     | 0.58   | 0.08   | -0.08 | 1.14  | 2.14     | -0.05   | 3.72     |
| AML t(15;17)     | 0.97    | 1.67                     | 1.09                         | 1.82                     | 0.74  | 0.39                        | 0.36                         | 0.96             | 1.38        | 1.24         | 1.48       | 0.4            | 0.78         | 0.64       | -0.01           | 0.06               | -0.13            | -0.32        | -0.28             | 0.66        | -0.17                     | 1.21   | 0.18   | 1.09  | 1.32  | 0.57     | 0.2     | -0.07    |
| AML t(15;17)     | 0.54    | 0.81                     | 0.47                         | 0.87                     | 0.45  | 0.25                        | 0.15                         | 0.62             | 0.78        | 1.06         | 0.78       | 0.12           | -0.05        | -0.01      | -0.06           | 0.01               | -0.23            | -0.24        | -0.17             | 0.49        | -0.24                     | 0.54   | -0.15  | 0.41  | 0.2   | -0.2     | -0.13   | 0.06     |
| AML t(15;17)     | 0.17    | 0.37                     | 0.07                         | 0.41                     | 0.07  | -0.15                       | -0.15                        | 0.13             | 0.1         | 0.25         | 0.26       | -0.02          | 0.07         | -0.13      | 0.06            | 0.28               | -0.18            | -0.32        | -0.26             | 0.46        | -0.26                     | 0.01   | -0.21  | -0.15 | -0.04 | -0.14    | -0.08   | -0.19    |
| AML t(15;17)     | 1.38    | 1.56                     | 1.41                         | 2.02                     | 1.55  | 0.01                        | -0.13                        | 0.66             | 1.73        | 2.14         | 1.8        | 0.89           | 0.12         | -0.06      | 0.11            | 0.23               | 0.07             | -0.35        | -0.34             | -0.19       | -0.13                     | 2.79   | -0.11  | 0.9   | 0.59  | 0.65     | -0.08   | X        |
| AML t(15;17)     | 0.83    | 1.42                     | 0.92                         | 1.54                     | 0.81  | 0.59                        | 0.26                         | 1.04             | 1.55        | 1.67         | 1.81       | 0.65           | 1.22         | 0.8        | 0.82            | 0.79               | 0.35             | -0.32        | -0.35             | 1.67        | 0.02                      | 0.89   | 0.25   | 0.59  | 1.74  | 0.66     | 0.38    | 0.35     |
| AML t(15;17)     | 1.11    | 1.65                     | 1.36                         | 2.05                     | 0.81  | 0.83                        | 1.07                         | 1.54             | 2.24        | 1.48         | 0.56       | 0.91           | 0.64         | 0.29       | 0.25            | 0.1                | -0.08            | -0.24        | -0.13             | -0.43       | -0.23                     | 0.45   | -0.15  | 1.35  | 0.16  | 0.26     | 0.19    | 1.14     |
| AML t(15;17)     | 0.32    | 3.88                     | 0.99                         | 4.09                     | 0.37  | 0.55                        | -0.07                        | 1.44             | 3.24        | 3.33         | 2.34       | 0.44           | 0.25         | 0.37       | 0.33            | 0.52               | -0.17            | -0.35        | -0.54             | 0.35        | -0.06                     | 0.46   | -0.04  | 4.66  | 2.97  | 1.37     | 3.46    | -0.33    |
| AML t(15;17)     | 0.03    | 0.66                     | 0.32                         | 1.9                      | 0.26  | -0.07                       | -0.15                        | 0.35             | 0.93        | 0.73         | 0.82       | 0.49           | -0.03        | -0.02      | 0.18            | -0.13              | -0.32            | -0.28        | 0.99              | 0.01        | 0.44                      | 0.12   | 3.07   | 0.49  | 0.49  | 0.11     | -0.11   |          |
| AML t(15;17)     | 0.88    | 1.17                     | 0.79                         | 1.32                     | 0.46  | 0.46                        | 0.77                         | 0.92             | 1.23        | 1.98         | 1.56       | 0.25           | 1.02         | 0.95       | -0.07           | -0.06              | 0.54             | -0.1         | 0.05              | 0.6         | -0.14                     | 0.62   | 0.01   | 1.51  | 1.79  | 0.21     | 0.04    | -0.02    |
| AML t(15;17)     | 1.15    | 1.21                     | 0.92                         | 1.61                     | 1.07  | 0.81                        | 0.55                         | 1.01             | 1.7         | 1.87         | 1.81       | 1.16           | 1.44         | 1.09       | 0.87            | 0.98               | 0.42             | -0.31        | -0.37             | 1.78        | 0.1                       | 1.15   | 0.37   | 2.22  | 1.16  | 1.32     | 0.4     | 0.5      |
| AML t(15;17)     | 0.23    | 1.37                     | 1.07                         | 1.67                     | 0.63  | -0.02                       | -0.32                        | 0.52             | 0.93        | 0.98         | 1.27       | 0.39           | 0.02         | -0.03      | 0.02            | 0.19               | 0.31             | -0.32        | -0.37             | 1.03        | 0.04                      | 0.98   | 0.32   | 0.56  | 1.23  | 1.82     | 0.29    | 0.25     |
| AML t(15;17)     | -0.06   | 0.4                      | 0.17                         | 0.78                     | 0.21  | -0.08                       | -0.18                        | 0                | 0.36        | 0            | 0          | -0.05          | -0.01        | 0          | -0.08           | 0                  | -0.13            | -0.24        | -0.22             | 0           | -0.12                     | -0.01  | -0.1   | 0.01  | -0.14 | 0.58     | -0.09   | -0.09    |
| AML t(15;17)     | 0.25    | 0.74                     | 0.65                         | 0.91                     | 0.56  | 0.09                        | -0.21                        | 0.93             | 1.16        | 0.12         | 0.13       | -0.02          | 0.45         | 0.2        | 0.09            | 0.15               | -0.06            | -0.32        | -0.33             | -0.17       | -0.13                     | 0.33   | -0.15  | 0.15  | 0.07  | 0.11     | -0.09   | 0.08     |
| AML t(15;17)     | -0.24   | 0.51                     | 0.33                         | 1.26                     | 0.19  | -0.21                       | -0.29                        | 0                | 0.16        | -0.01        | -0.03      | -0.23          | -0.17        | -0.16      | -0.26           | -0.26              | -0.21            | -0.29        | -0.34             | 0.24        | -0.25                     | -0.18  | -0.2   | -0.19 | X     | 0.07     | -0.19   | -0.21    |
| AML t(15;17)     | -0.21   | 0.51                     | -0.01                        | 1.13                     | 0.17  | -0.21                       | -0.28                        | 0.07             | 0.53        | 0.28         | 0.7        | -0.21          | -0.17        | -0.16      | -0.23           | -0.2               | -0.3             | -0.35        | -0.36             | -0.17       | -0.19                     | 0.33   | -0.13  | -0.35 | -0.07 | -0.19    | -0.21   | -0.29    |
| AML t(15;17)     | -0.04   | 0.54                     | 0.49                         | 1.26                     | 0.62  | -0.15                       | -0.23                        | -0.01            | 0.42        | 0.38         | 0.36       | -0.05          | 0.18         | -0.19      | -0.11           | -0.07              | -0.16            | -0.32        | -0.34             | -0.01       | -0.17                     | 0.22   | -0.01  | -0.06 | 0.92  | 0.12     | -0.11   | 0.25     |
| AML t(15;17)     | -0.03   | 0.2                      | 0.07                         | 0.4                      | -0.03 | -0.19                       | -0.21                        | 0.06             | 0.53        | 0.3          | 0.3        | -0.05          | 0.35         | 0.4        | -0.14           | -0.09              | -0.02            | -0.3         | -0.35             | 1.12        | -0.05                     | 0.53   | 0.17   | -0.15 | 3.67  | 0.11     | -0.09   | -0.09    |
| AML t(15;17)     | 0.77    | 0.81                     | 0.45                         | 0.94                     | 0.53  | 0.65                        | 0.5                          | 1.38             | 2.97        | 3.52         | 2.82       | 0.49           | 0.47         | -0.03      | -0.11           | -0.1               | -0.04            | -0.32        | -0.34             | 1.6         | -0.16                     | 0.63   | -0.07  | 0.96  | 1.93  | 0.26     | -0.02   | 0.54     |
| AML t(15;17)     | 0.78    | 0.95                     | 0.6                          | 1.04                     | 0.46  | 0.15                        | -0.12                        | 0.85             | 1.43        | 1.04         | 0.29       | 0.54           | 0.86         | 0.65       | 0               | 0                  | -0.23            | -0.29        | -0.12             | -0.11       | 1.93                      | 0      | 0.74   | 0.47  | -0.05 | 0        | 0.85    |          |
| AML t(15;17)     | 0.42    | 0.53                     | 0.26                         | 0.76                     | 0.2   | 0.13                        | -0.16                        | 0.53             | 0.84        | 0.54         | 0.58       | 0.26           | 0.04         | 0.15       | -0.01           | 0.03               | 0.11             | -0.28        | -0.33             | 0.06        | -0.03                     | 0.27   | -0.04  | 0.49  | 0.63  | 0.39     | -0.05   | 0.6      |
| AML t(15;17)     | 0.76    | 1.23                     | 0.69                         | 1.59                     | 0.31  | -0.15                       | -0.17                        | 0.98             | 1.65        | 0.96         | 0.99       | 0.96           | 1.34         | 0.55       | 0.16            | 0                  | -0.03            | -0.27        | -0.27             | -0.05       | -0.12                     | 0.56   | 0.06   | 0.36  | 0.49  | 2.31     | 0       | -0.21    |
| AML t(15;17)     | -0.15   | 0.22                     | 0.05                         | 0.94                     | -0.07 | -0.16                       | -0.21                        | 0.14             | -0.02       | -0.03        | -0.04      | -0.2           | -0.22        | -0.22      | -0.22           | -0.19              | -0.2             | -0.33        | -0.31             | 0.23        | -0.16                     | 0.03   | -0.02  | -0.15 | -0.27 | 0.39     | -0.12   | -0.16    |
| AML t(15;17)     | 0.25    | 1.13                     | 0.89                         | 2.09                     | 0.75  | 0.13                        | -0.33                        | 0.86             | 1.46        | 0.63         | 0.86       | 0.21           | -0.05        | 0          | -0.02           | 0.01               | -0.01            | -0.34        | -0.29             | 0.14        | -0.13                     | 0.93   | 0.16   | 0.18  | 3.98  | 1.72     | 0.04    | -0.18    |
| AML t(15;17)     | -0.08   | 0.47                     | 0.45                         | 0.49                     | 0.42  | -0.03                       | -0.25                        | 0.4              | 0.62        | 0.13         | 0.01       | -0.05          | -0.14        | -0.12      | -0.04           | 0.08               | -0.07            | -0.33        | -0.32             | 0.09        | -0.16                     | 0.05   | -0.16  | 0.09  | -0.09 | 0.05     | -0.1    | -0.18    |
| AML t(15;17)     | 0       | 1.1                      | 0.97                         | 1.45                     | 0.49  | -0.14                       | -0.24                        | 0.12             | 0           | 0            | 0          | -0.08          | 0.11         | 0.02       | 0               | 0                  | -0.12            | -0.26        | -0.26             | -0.15       | -0.14                     | 0      | -0.16  | -0.03 | -0.04 | -0.14    | -0.07   | 0.7      |
| AML t(15;17)     | 0.19    | 0.99                     | 0.83                         | 1.57                     | 0.62  | 0.14                        | -0.07                        | 0.49             | 0.48        | 0.34         | 0.26       | 0              | 0.19         | 0.2        | 0.27            | 0.12               | -0.05            | -0.2         | -0.24             | -0.07       | -0.13                     | 0.85   | -0.07  | 0.1   | 0.29  | 0        | 0       | 0.31     |
| AML t(15;17)     | 0.02    | 0.99                     | 0.85                         | 1.62                     | 0.49  | 0.08                        | -0.16                        | 0.4              | 0.49        | 0.34         | 0.31       | 0.13           | 0.03         | 0.09       | 0.16            | 0.23               | -0.05            | -0.25        | -0.22             | -0.07       | -0.08                     | 0.87   | -0.06  | 0     | 0.25  | 0.01     | 0       | 0.11     |
| AML t(15;17)     | 0       | 1.06                     | 0.98                         | 1.46                     | 0.83  | 0.21                        | -0.12                        | 0.5              | 0.31        | 0.2          | 0.11       | 0              | 0.02         | 0          | 0               | 0                  | -0.24            | -0.24        | -0.08             | -0.12       | 0.32                      | -0.07  | 0      | 0.05  | -0.03 | -0.05    | 0.38    |          |
| AML t(15;17)     | -0.03   | 0.65                     | 0.53                         | 1.02                     | 0.5   | 0.12                        | -0.19                        | 0.36             | 0.33        | 0.17         | 0.19       | -0.01          | 0.01         | -0.03      | -0.02           | -0.01              | -0.09            | -0.29        | -0.29             | -0.21       | -0.2                      | 0.34   | -0.15  | -0.03 | 0.26  | -0.17    | -0.16   | 0.22     |
| AML t(15;17)     | 0.21    | 0.81                     | 0.69                         | 1.25                     | 0.48  | 0.18                        | -0.19                        | 0.45             | 0.41        | 0.25         | 0.25       | -0.01          | 0.16         | 0.23       | 0.3             | 0.11               | -0.12            | -0.28        | -0.26             | -0.15       | -0.21                     | 0.64   | -0.16  | 0.19  | 0.4   | 0.05     | -0.15   | 0.24     |
| AML t(15;17)     | 0.18    | 0.86                     | 0.76                         | 1.06                     | 0.59  | 0.24                        | -0.16                        | 0.48             | 0.39        | 0.29         | 0.33       | 0.07           | 0.1          | 0.17       | 0.24            | 0.29               | -0.1             | -0.28        | -0.29             | -0.17       | -0.2                      | 0.67   | -0.14  | 0.15  | 0.56  | -0.13    | -0.11   | 0.21     |
| AML t(15;17)     | 0.11    | 1.03                     | 0.93                         | 1.44                     | 0.62  | 0.23                        | -0.22                        | 0.58             | 0.48        | 0.47         | 0.39       | 0.09           | 0.09         | 0.1        | 0.18            | 0.21               | -0.07            | -0.31        | -0.31             | -0.13       | -0.2                      | 0.7    | -0.08  | 0.18  | 0.79  | 0.04     | -0.15   | -0.02    |
| AML t(15;17)     | 0.36    | 0.98                     | 0.79                         | 1.37                     | 0.83  | 0.28                        | -0.2                         | 0.6              | 0.59        | 0.49         | 0.57       | 0.23           | 0.25         | 0.32       | 0.47            | 0.56               | -0.05            | -0.29        | -0.31             | -0.18       | -0.17                     | 0.54   | -0.11  | 0.23  | 0.74  | 0.09     | -0.16   | 0.11     |
| AML t(15;17)     | 0.23    | 1.23                     | 0.84                         | 2.12                     | 0.67  | 0.18                        | -0.28                        | 0.54             | 0.68        | 0.63         | 0.64       | 0.43           | 0.19         | 0.31       | 0.45            | 0.5                |                  |              |                   |             |                           |        |        |       |       |          |         |          |

|                  |                | pMAPKAPK2                |                                        |                                  |       |                               |                  |                  |             |              |            |                |              |            |                 |                    |                  |              |                   |             |                                       |        |        |       |       |          |         |          |       |       |
|------------------|----------------|--------------------------|----------------------------------------|----------------------------------|-------|-------------------------------|------------------|------------------|-------------|--------------|------------|----------------|--------------|------------|-----------------|--------------------|------------------|--------------|-------------------|-------------|---------------------------------------|--------|--------|-------|-------|----------|---------|----------|-------|-------|
|                  |                | CD34+CD38 <sup>low</sup> | HSC/MPP-<br>CD33negCD38 <sup>low</sup> | CMP-<br>CD34+CD38 <sup>mid</sup> | GMP   | 34negCD38 <sup>+</sup> Undiff | 34neg38negUndiff | Myelo/Mono blast | ProMonocyte | CD14neg Mono | CD14+ Mono | 11b+DRneg Mono | ProMyelocyte | Myelocytes | Meta-myelocytes | Mature Granulocyte | Pro-erythroblast | Erythroblast | Late Erythroblast | Pre-B Cells | Mature B cells CD20+CD19 <sup>+</sup> | Plasma | T Cell | pDC   | mDC   | Basophil | NK Cell | Platelet |       |       |
| CBF-AML (8:21)   | TB-AMLx1_AML26 | 1.24                     | 2.17                                   | 2.03                             | 2.81  | 2.27                          | 1.8              | 0.75             | 3.08        | 3.3          | 2.89       | 2.55           | 1.69         | 0.3        | 0.95            | 1.02               | 1.6              | 0.97         | 0.32              | 0.14        | 2.82                                  | 3      | 2.8    | 0.98  | 2.34  | 3        | 1.73    | 0.87     | -0.03 |       |
|                  | TB-AMLx3_AML35 | 3.73                     | 3.93                                   | 3.8                              | 4.49  | 3.5                           | 4.77             | 5.72             | 5.44        | 8.76         | 7.89       | 9.09           | 6.46         | 2.57       | 3.17            | 3.52               | 3.83             | 5.33         | 1.41              | 1.35        | 7.12                                  | 4.89   | 5.89   | 5.09  | 5.33  | 9.72     | 5.84    | 3.25     | 0.9   |       |
|                  | TB-AMLx3_AML5  | 9.51                     | 4.75                                   | 4.26                             | 6.4   | 6.73                          | 12.82            | 8.49             | 13.88       | 18.38        | 21.73      | 18.27          | 15.97        | 10.73      | 9.53            | 8.79               | 5.41             | 22.84        | 1.43              | 0.28        | 14.33                                 | 8.39   | 14.37  | 9.63  | 12.02 | 23.64    | 12      | 6.45     | 6.56  |       |
| CBF-AML inv(16)  | TB-AMLx1_AML10 | 8.27                     | 6.8                                    | 5.84                             | 7.65  | 7.61                          | 7.49             | 4.94             | 9.52        | 11.04        | 10.95      | 10.07          | 8.78         | 9.95       | 9.24            | 8.1                | 5                | 15.79        | 2.15              | 2.56        | 9.46                                  | 5.98   | 10.59  | 6.37  | 6.03  | 7.56     | 5.96    | 4.61     | 23.27 |       |
|                  | TB-AMLx2_AML32 | 10.95                    | 10.47                                  | 10.04                            | 11.48 | 11.07                         | 12.13            | 2.43             | 13.32       | 11.78        | 19.6       | 15.94          | 9.37         | 10.62      | 12.33           | 8.78               | 5                | 4.72         | 20.32             | 1.22        | 0.06                                  | 11.73  | 6.12   | 13.43 | 8.84  | 9.35     | 10      | 7.58     | 5.78  | 12.17 |
| APL t(15:17)     | TB-AMLx2_AP4   | 9.3                      | 7.81                                   | 6.58                             | 8.33  | 10.14                         | 9.02             | 6.41             | 11.37       | 8.51         | 8.96       | 9.22           | 11.69        | 9.34       | 9.78            | 2.44               | 2.89             | 16.48        | 2.6               | 2.81        | 8.35                                  | 5.08   | 6.47   | 5.98  | 8.65  | 10.44    | 11.95   | 5.07     | 6.36  |       |
|                  | TB-AMLx3_AP5   | 15.83                    | 12.73                                  | 10.24                            | 12.99 | 14.27                         | 12.75            | 10.6             | 16.54       | 12.61        | 13.11      | 11.91          | 18.44        | 16.49      | 17.77           | 5.48               | 4.69             | 22.09        | 3                 | 6.84        | 14.85                                 | 6.97   | 7.36   | 7.69  | 9.08  | 13.96    | 19.7    | 7.88     | X     |       |
|                  | TB-AMLx3_AP3   | 6.75                     | 7.12                                   | 6.6                              | 7.96  | 8.2                           | 7.3              | 5.86             | 8.65        | 10.17        | 10.07      | 9.08           | 10.39        | 7.82       | 8.51            | 5.65               | 4.59             | 6.23         | 2.01              | 1.68        | 7.88                                  | 5.68   | 4.43   | 5.65  | 5.85  | 9.45     | 10.05   | 5.03     | 3.55  |       |
| FLT3-ITD+ NK-AML | TB-AMLx1_AML27 | 11.66                    | 6.71                                   | 4.89                             | 7.02  | 5.82                          | 9.71             | 7.94             | 13.28       | 12.03        | 7.99       | 12.02          | 18.23        | 16.37      | 13.92           | 6.45               | 4.39             | 18.73        | 1.94              | 0.8         | 10.48                                 | 6.49   | 13.36  | 7.37  | 4.69  | 14.85    | 19.18   | 6.79     | 8.76  |       |
|                  | TB-AMLx2_AML20 | 10.87                    | 8.71                                   | 6.86                             | 9.19  | 9.53                          | 9.68             | 11.28            | 12.7        | 13.91        | 12.69      | 13.5           | 14.12        | 14.17      | 11.02           | 9.76               | 6.43             | 25.55        | 1.69              | 1.81        | 14.14                                 | 8.32   | 16.59  | 9.25  | 6.09  | 14.18    | 5.58    | 7.52     | 1.77  |       |
|                  | TB-AMLx2_AML15 | 13.15                    | 12.61                                  | 10.68                            | 12.89 | 15.36                         | 16.35            | 12.2             | 18.44       | 19.18        | 15.47      | 12.68          | 20.35        | 15.52      | 11.74           | 4.63               | 4.75             | 44.07        | 2.17              | 0.79        | 8.42                                  | 5.71   | 11.78  | 7.82  | 7.1   | 17.46    | 20.33   | 6.55     | 4.22  |       |
|                  | TB-AMLx2_AML23 | 9.23                     | 8.53                                   | 7.41                             | 8.76  | 9.23                          | 7.25             | 6.71             | 9.88        | 11.93        | 11.75      | 11.52          | 8.19         | 7.93       | 5.91            | 2.02               | 1.55             | 18.51        | 2.07              | 1.31        | 7.31                                  | 7.65   | 13.77  | 8.02  | 4.72  | 11.82    | 6.88    | 6.27     | 4.75  |       |
|                  | TB-AMLx2_AML30 | 15.96                    | 12.41                                  | 10.76                            | 12.56 | 15.15                         | 15.76            | 12.16            | 15.67       | 15.11        | 24.93      | 22.02          | 18.94        | 13.36      | 14.65           | 8.45               | 6.57             | 23.17        | 2.63              | 2.04        | 15.24                                 | 6.87   | 14.55  | 9.53  | 9.26  | 14.55    | 9.41    | 6.25     | 4.7   |       |
|                  | TB-AMLx2_AML39 | 6.51                     | 3.64                                   | 5.02                             | 3.69  | 2.57                          | 6.54             | 5.88             | 5.37        | 5.06         | 6.3        | 7.58           | 11.11        | 7.11       | 8.28            | 6.67               | 4.08             | 14.29        | 1.99              | 1.54        | 6.16                                  | 5.25   | 8.49   | 5.6   | 3.18  | 4.03     | 8.78    | 4.44     | 11.06 |       |
|                  | TB-AMLx3_AML7  | 12.79                    | 6.78                                   | 9.06                             | 6.1   | 8.38                          | 4.98             | 3.94             | 7.48        | 11.72        | 16.42      | 17.28          | 10.58        | 6.67       | 5.92            | 4.75               | 4.11             | 14.18        | 1.22              | 0.69        | 6.04                                  | 7.2    | 20.13  | 6.88  | 5.76  | 5.62     | 9.04    | 5.33     | X     |       |
|                  | TB-AMLx3_AML9  | 7.56                     | 10.74                                  | 9.8                              | 11.06 | 12.83                         | 13.91            | 8.41             | 14.03       | 15.61        | 16.09      | 16.78          | 5.79         | 5.71       | 5.13            | 6.64               | 4.98             | 24.95        | 2.45              | 0.58        | 11.03                                 | 8.07   | 13.06  | 8.76  | 10.02 | 18.33    | 12.48   | 7.29     | 4.46  |       |
|                  | TB-AMLx3_AML37 | 15.85                    | 13.89                                  | 14.06                            | 13.59 | 17.02                         | 19.01            | 17.43            | 16.96       | 14.62        | 7.07       | 7.62           | 15.07        | 15.93      | 8.42            | 7.52               | 4.57             | 38.12        | 2.58              | 9.31        | 9.63                                  | 6.29   | 12.43  | 6.54  | 2.98  | 5.26     | 9.59    | 7.2      | 7.83  |       |
|                  | TB-AMLx4_AML38 | 8.7                      | 11.85                                  | 8.58                             | 12.08 | 10.02                         | 14.27            | 5.95             | 14.73       | 16.3         | 16.93      | 14.49          | 10.23        | 15.54      | 9.8             | 8.18               | 6.71             | 3.4          | 1.77              | 0.93        | 11.43                                 | 8.1    | 12.67  | 8.58  | 10.18 | 18.92    | 21.36   | 12.82    | 2.25  |       |
|                  | TB-AMLx4_AML40 | 7.64                     | 6.8                                    | 5.66                             | 11.21 | 9.13                          | 9.94             | 3.33             | 12.21       | 16.25        | 13.5       | 14.35          | 12.66        | 12.47      | 6.69            | 4.27               | 4.1              | 22.42        | 1.53              | 0.37        | 13.61                                 | 4.3    | 9.56   | 6.68  | 11.5  | 10.08    | 4.03    | 4.85     | 1.22  |       |
|                  | TB-AMLx2_AML31 | 14.52                    | 12.6                                   | 10.68                            | 13.42 | 13.27                         | 13.81            | 12.63            | 16.75       | 15.72        | 15.44      | 24.73          | 16.46        | 15.34      | 15.9            | 6.73               | 3.84             | 41.28        | 9.66              | 12.01       | 14.5                                  | 6.82   | 14.36  | 8.68  | 9.16  | 11.69    | 15      | 6.79     | 1.72  |       |
| TB-AMLx2_AML8    | 10.63          | 7.1                      | 6.78                                   | 7.6                              | 7.08  | 10.28                         | 4.41             | 10.7             | 11.04       | 11.73        | 11.9       | 10.33          | 10.16        | 4.94       | 6.34            | 4.78               | 13.34            | 2.81         | 0.78              | 12.53       | 6.62                                  | 11.31  | 6.95   | 3.43  | 9.73  | 5.58     | 5.01    | 2.43     |       |       |
| TB-AMLx4_AML8    | 7.07           | 8.45                     | 7.27                                   | 12.46                            | 10.03 | 5.57                          | 0.42             | 8.86             | 12.28       | 16.05        | 15.84      | 7.77           | 3.48         | 3.82       | 4.45            | 4.12               | 14.16            | 1.69         | -0.18             | 10.98       | 10.4                                  | 12.09  | 7.83   | 7.31  | 14.14 | 5.79     | 5.33    | 27.19    |       |       |
| FLT3wt NK-AML    | TB-AMLx1_AML13 | 2.9                      | 7.18                                   | 6.16                             | 8.56  | 6.58                          | 5.25             | 3.14             | 6.98        | 9.28         | 5.47       | 6              | 3.76         | 1.84       | 1.97            | 1.51               | 2.36             | 6.78         | 1.96              | 0.43        | 5.18                                  | 3.67   | 3.8    | 3.3   | 4.45  | 3.02     | 2.91    | 2.11     | 0     |       |
|                  | TB-AMLx2_AML33 | 2.26                     | 3.76                                   | 3.42                             | 4.55  | 3.62                          | 4.36             | 0.14             | 4.49        | 5.99         | 4.41       | 4.17           | 4.49         | 2.16       | 2.09            | 1.55               | 1.31             | 7.73         | 0.55              | -0.14       | 3.3                                   | 3.06   | 7.3    | 2.69  | 3.85  | 5.31     | 3.54    | 1.78     | 4.14  |       |
|                  | TB-AMLx2_AML40 | 2.5                      | 4.03                                   | 7.26                             | 12.2  | 7.22                          | 3.93             | 1.85             | 7.78        | 10.34        | 8.88       | 8.61           | 3.83         | 1.11       | 1.75            | 1.54               | 1.41             | 7.51         | 2.62              | 0.49        | 7.34                                  | 4.67   | 4.88   | 4.64  | 4.65  | X        | 2.79    | 3.13     | 1.64  |       |
|                  | TB-AMLx3_AML36 | 3.34                     | 4.78                                   | 4.23                             | 8.22  | 5.6                           | 4.03             | 1.73             | 7.63        | 9.89         | 10.59      | 9.71           | 5.06         | 1.57       | 2.9             | 3.11               | 3.51             | 4.9          | 2.12              | 0.73        | 6.24                                  | 4.13   | 4.56   | 4.55  | 7.66  | 6.219    | 4.34    | 3.04     | 1.79  |       |
|                  | TB-AMLx4_AML14 | 5.37                     | 7.06                                   | 6.76                             | 10.63 | 8.97                          | 5.52             | 4.68             | 8           | 12.08        | 8.27       | 11.98          | 8.41         | 3.67       | 3.3             | 1.05               | 1.98             | 14.8         | 2.31              | 0.4         | 6.62                                  | 5.18   | 7.57   | 6.51  | 7.34  | 17.32    | 1.48    | 4.22     | 0.77  |       |
|                  | TB-AMLx4_AML15 | 7.4                      | 7.67                                   | 6.96                             | 8.94  | 7.33                          | 9.21             | 9.35             | 9.99        | 10.77        | 8.12       | 9.9            | 11.08        | 8.48       | 10.5            | 4.44               | 4.63             | 10.88        | 2.32              | 0.18        | 9.01                                  | 5.08   | 7.81   | 6.68  | 5.74  | 13.66    | 5.62    | 4.19     | 0.63  |       |
| MLL t(10:11)     | TB-AMLx2_AML22 | 4.23                     | 4.38                                   | 4.4                              | 4.37  | 4.27                          | 3.57             | 3.35             | 3.87        | 6.78         | 7.61       | 9.42           | 5.02         | 4.35       | 4.24            | 6.33               | 5.26             | 21.09        | 1.99              | 0.37        | 10.35                                 | 5.91   | 10.72  | 7.73  | 4.28  | 4.15     | 4.04    | 4.97     | 2.19  |       |
|                  | TB-AMLx1_AML18 | 8.67                     | 5.9                                    | 4.02                             | 6.88  | 6.93                          | 11.64            | 0.73             | 9.22        | 11.93        | 12.61      | 8.18           | 9.43         | 9.3        | 8.18            | 3.07               | 2.57             | 21.28        | 1.77              | 0.16        | 4.64                                  | 6.11   | 17.16  | 7.49  | 5.45  | 16.34    | 5.08    | 4.62     | 1.79  |       |
|                  | TB-AMLx2_AML19 | 7.31                     | 7.7                                    | 5.97                             | 8.41  | 6.66                          | 9.22             | 6.49             | 6.7         | 9.92         | 11.07      | 9.67           | 10.31        | 4.62       | 6.59            | 4.52               | 3.23             | 12.56        | 2.93              | 0.51        | 11.1                                  | 5.84   | 6.94   | 7.12  | 5.63  | 12.4     | 8.66    | 5.73     | 13.81 |       |
|                  | TB-AMLx2_AML29 | 9.95                     | 10.49                                  | 8.03                             | 11.99 | 7.92                          | 6.8              | 4.84             | 11.79       | 15.66        | 29.83      | 25.12          | 13.15        | 11.84      | 6.4             | 4.69               | 3.2              | 17.53        | 1.72              | 0.44        | 9.05                                  | 8.28   | 8.23   | 8.33  | 11.91 | 11.42    | 5.59    | 8.17     |       |       |
|                  | TB-AMLx2_AML41 | 4.85                     | 4.37                                   | 3.51                             | 7.37  | 6.48                          | 4.47             | 2.83             | 6.02        | 8.48         | 8.21       | 7.39           | 4.43         | 4.14       | 4.35            | 3.91               | 3.24             | 9.12         | 1.6               | 0.32        | 9.05                                  | 5.61   | 6.06   | 5.48  | 5.89  | 5.51     | 3.48    | 3.99     | 2.14  |       |
| TB-AMLx2_AML4    | 4.65           | 8.82                     | 7.56                                   | 11.5                             | 9.99  | 5.04                          | 4.16             | 2.59             | 4.65        | 6.71         | 6.27       | 5.68           | 4.78         | 4.15       | 3.23            | 3.21               | 3.26             | 7.61         | 3.23              | 1.6         | 3.82                                  | 3.77   | 8.37   | 3.64  | 3.62  | 6.39     | 2.51    | 2.62     | 8.44  |       |
| TB-AMLx4_AML25   | 5.43           | 10.57                    | 12.05                                  | 4.81                             | 15.22 | 10.72                         | 2.9              | 14               | 17.14       | 12.44        | 12.43      | 8.96           | 6.8          | 3.75       | 2.61            | 2.86               | 9.3              | 1.08         | 1.18              | 16.36       | 8.08                                  | 7.32   | 7.48   | 9.03  | 10.67 | 9.12     | 5.17    | 0.2      |       |       |
| Healthy Donors   | TB-AMLx1_N1-1  | 3                        | 4.26                                   | 3.52                             | 4.99  | 3.85                          | 2.52             | 0.36             | 4.26        | 6.38         | 5.78       | 5.13           | 2.6          | 1.68       | 2.49            | 4.37               | 2.9              | 3.1          | 0.91              | 0.54        | 3.5                                   | 3.11   | 3.6    | 1.87  | 2.88  | 4.53     | 1.46    | 1.25     | 4.97  |       |
|                  | TB-AMLx1_N1-3  | 3.45                     | 4.32                                   | 4.04                             | 6.23  | 4.57                          | 4.13             | 1.96             | 4.84        | 6.15         | 5.75       | 5.06           | 3.87         | 3.72       | 3.27            | 3.44               | 3.4              | 5.98         | 2.74              | 1.03        | 3.88                                  | 3.93   | 7.65   | 2.87  | 4     | 5.98     | 2.34    | 2.24     | 7.13  |       |
|                  | TB-AMLx1_N1-5  | 3.44                     | 6.12                                   | 5.68                             | 7.52  | 6.85                          | 5.77             | 1.97             | 7.77        | 11.05        | 10.43      | 7.88           | 5.79         | 4.15       | 4.36            | 4.07               | 2.33             | 7.49         | 1.16              | 0.86        | 4.34                                  | 4.71   | 11.68  | 3.86  | 4.04  | 8.67     | 2.89    | 2.99     | 6.93  |       |
|                  | TB-AMLx1_N1-6  | 3.25                     | 4.23                                   | 3.98                             | 5.31  | 5.44                          | 3.86             | 2.18             | 5.5         | 6.67         | 6.25       | 5.59           | 3.75         | 3.44       | 4.94            | 5.04               | 1.92             | 7.44         | 1.59              | 0.66        | 4.09                                  | 3.92   | 6.51   | 2.7   | 3.83  | 5.98     | 1.77    | 1.98     | 3.32  |       |
|                  | TB-AMLx2_N1-6  | 3.16                     | 5.1                                    | 4.68                             | 5.9   | 6.19                          | 4.23             | 2.98             | 5.54        | 7.56         | 7.41       | 6.14           | 4.74         | 3.53       | 3.53            | 4.54               | 4.08             | 1.85         | 10.83             | 1.89        | 0.87                                  | 3.64   | 3.46   | 7.58  | 3.66  | 3.65     | 7.12    | 1.54     | 2.49  | 3.3   |
|                  | TB-AMLx2_N1-3  | 3.43                     | 5.14                                   | 4.57                             | 6.99  | 5.04                          | 4.16             | 2.59             | 4.65        | 6.71         | 6.27       | 5.68           | 4.78         | 4.15       | 3.23            | 3.21               | 3.26             | 7.61         | 3.23              | 1.6         | 3.82                                  | 3.77   | 8.37   | 3.64  | 3.62  | 6.39     | 2.51    | 2.62     | 8.44  |       |
|                  | TB-AMLx2_N1-4  | 3.73                     | 5.21                                   | 4.89                             | 5.99  | 5.95                          | 4.8              | 3.54             | 4.91        | 8.3          | 7.65       | 6.33           | 5.06         | 5.74       | 4.23            | 3.59               | 2.93             | 8.86         | 3.56              | 1.47        | 4.12                                  | 3.47   | 6.68   | 3.75  | 3.46  | 6.96     | 2.65    | 2.75     | 6.97  |       |
|                  | TB-AMLx3_N1-6  | 4.12                     | 6.89                                   | 6.5                              | 7.93  | 7.30                          | 5.42             | 3.85             | 7.07        | 9.64         | 9.68       | 8.22           | 6.09         | 4.56       | 5.25            | 4.66               | 2.6</            |              |                   |             |                                       |        |        |       |       |          |         |          |       |       |

**PATM Median**

|                    | CD34+CD38 <sup>+</sup> Ungated | CD34+CD38 <sup>+</sup> 4CD38 <sup>low</sup> | HSC/MPP- CD33negCD34 <sup>+</sup> CD38 <sup>low</sup> | CMP- CD34 <sup>+</sup> CD38 <sup>+</sup> cwcCD33mid | GMP   | 34negCD38 <sup>+</sup> +Undiff | 34neg38neg Undiff | Myelo/Mono blast | ProMonocyte | CD14neg Monoc | CD14+ Mono | 11b+DRneg Mono | ProMyelocyte | Myelocytes | Meta-myelocytes | Mature Granulocyte | Pro-erythroblast | Erythroblast | Late Erythroblast | Pre-B Cells | Mature B cells CD20+CD19+ | Plasma | T Cell | pDC   | mDC   | Basophil | NK Cell | Platelet |
|--------------------|--------------------------------|---------------------------------------------|-------------------------------------------------------|-----------------------------------------------------|-------|--------------------------------|-------------------|------------------|-------------|---------------|------------|----------------|--------------|------------|-----------------|--------------------|------------------|--------------|-------------------|-------------|---------------------------|--------|--------|-------|-------|----------|---------|----------|
| CBF-AML t(8;21)    | 2.58                           | 3.83                                        | 3.84                                                  | 4.26                                                | 3.89  | 1.66                           | 1.21              | 3.52             | 3.97        | 4.68          | 4.45       | 4.31           | 1.41         | 2.28       | 2.86            | 3.4                | 3.97             | 2.58         | 1.38              | 4.35        | 2.1                       | 5.03   | 2.4    | 3.27  | 5.24  | 2.38     | 2.24    | 10.68    |
| CBF-AML inv(16)    | 19.56                          | 22.74                                       | 22.61                                                 | 23.26                                               | 22.64 | 14.22                          | 8.43              | 23.21            | 18.12       | 9.35          | 7.7        | 7.68           | 13.11        | 6.4        | 2.9             | 2.35               | 28.48            | 7.36         | 4.32              | 9.96        | 4.53                      | 11.83  | 5.28   | 13.08 | 7.71  | 4.89     | 4.89    | 4.48     |
| APL t(15;17)       | 7.46                           | 7.48                                        | 4.97                                                  | 12.1                                                | 9.57  | 7.67                           | 6.54              | 7.56             | 9.63        | 8.25          | 5.22       | 7.24           | 7.37         | 7.71       | 1.7             | 1.89               | 18.52            | 6.55         | 6.01              | 7.97        | 4.07                      | 9.93   | 4.67   | 12.19 | 5.07  | 8.03     | 4.16    | 2.99     |
| FLT3-ITD+ NK-AML   | 18.79                          | 15.46                                       | 14.31                                                 | 15.6                                                | 16.88 | 18.09                          | 16.48             | 20.49            | 19.5        | 19.25         | 6.61       | 16.99          | 13.76        | 11.3       | 2.57            | 1.69               | 39.77            | 8.65         | 1.83              | 17.49       | 4.34                      | 12.32  | 5.28   | 20.86 | 8.44  | 18.73    | 7.14    | 3.92     |
| FLT3-TKD+ NK-AML   | 10.63                          | 11.07                                       | 8.94                                                  | 12.48                                               | 12.9  | 9.47                           | 6.07              | 12.03            | 13.87       | 13.33         | 10.69      | 6.87           | 6.59         | 3.77       | 3.93            | 3.95               | 31.83            | 3.36         | 1.92              | 12.26       | 5.1                       | 53.54  | 5.07   | 16.92 | 7.16  | 8.38     | 4.95    | X        |
| MLL t(10;11)       | 17.12                          | 20.59                                       | 14.87                                                 | 22.25                                               | 18.46 | 17.75                          | 17.94             | 20.86            | 20.26       | 18.52         | 14.5       | 3.4            | 8.22         | 2.63       | 2.13            | 1.99               | 20.83            | 5.36         | 1.05              | 17.84       | 5.33                      | 10.43  | 5.72   | 19.14 | 15.27 | 1.71     | 5.93    | 2.17     |
| ADK-AML Cmplx/Mono | 3.83                           | 9.94                                        | 8.73                                                  | 14.99                                               | 9.29  | 5.21                           | 2.92              | 3                | 3.17        | 3.16          | 2.98       | 2.03           | 2.53         | 2.66       | 2.38            | 2.24               | 12.86            | 6.42         | 1.18              | 8.1         | 7.49                      | 8.24   | 5.88   | 5.84  | 2.14  | 7.19     | 4.52    | 1.57     |
| Healthy Donors     | 3.89                           | 12.97                                       | 12.01                                                 | 11.58                                               | 13.79 | 10.02                          | 5.18              | 9.73             | 6.92        | 5.71          | 5.45       | 4.27           | 5.01         | 3.21       | 2.71            | 2.73               | 18.2             | 5.99         | 2.58              | 4.07        | 4.55                      | 11.65  | 4.51   | 8.71  | 8.24  | 2.29     | 4.73    | 3.73     |
| CR / CR1           | 2.19                           | 6.05                                        | 4.67                                                  | 13.53                                               | 5.02  | 4.28                           | 1.85              | 4.74             | 4.2         | 2.92          | 3.14       | 1.71           | 2.31         | 1.7        | 1.12            | 1.36               | 6.48             | 4.51         | 1.81              | 2.74        | 3.16                      | 6.87   | 3.75   | 4.29  | 5.5   | 4.9      | 3.62    | 1.12     |



|                 |                       | pSTAT3 Median            |                                   |                            |                          |       |                             |                              |                     |             |                 |            |                   |              |            |                     |                       |                      |              |                      |             |                                 |        |        |       |       |          |         |          |       |
|-----------------|-----------------------|--------------------------|-----------------------------------|----------------------------|--------------------------|-------|-----------------------------|------------------------------|---------------------|-------------|-----------------|------------|-------------------|--------------|------------|---------------------|-----------------------|----------------------|--------------|----------------------|-------------|---------------------------------|--------|--------|-------|-------|----------|---------|----------|-------|
|                 |                       | CD34+CD38 <sup>low</sup> | HSC/MPP-<br>4+CD38 <sup>low</sup> | CD33negCD38 <sup>low</sup> | CD34+CD38 <sup>mid</sup> | GMP   | 34negCD38 <sup>undiff</sup> | 34neg38neg <sup>undiff</sup> | Myelo/Mono<br>blast | ProMonocyte | CD14neg<br>Mono | CD14+ Mono | 11b+DRneg<br>Mono | ProMyelocyte | Myelocytes | Meta-<br>myelocytes | Mature<br>Granulocyte | Pro-<br>erythroblast | Erythroblast | Late<br>Erythroblast | Pre-B Cells | Mature B<br>cells<br>CD20+CD19+ | Plasma | T Cell | pDC   | mDC   | Basophil | NK Cell | Platelet |       |
| TB-AML1_1_AML26 | CBF-AML<br>t(8;21)    | 0.15                     | -0.19                             | -0.21                      | 0                        | -0.2  | 0                           | -0.05                        | -0.04               | 0.04        | 0               | 0.3        | 0.28              | 0.32         | 0.46       | 0.48                | 0.97                  | -0.06                | -0.11        | -0.19                | 0           | -0.18                           | 0.84   | 0      | -0.01 | 0     | 0        | -0.2    | -0.9     |       |
|                 |                       | 0.26                     | -0.2                              | -0.22                      | -0.14                    | -0.24 | -0.04                       | 0.68                         | -0.13               | 0.36        | 0.32            | 1.55       | 0.08              | 0.74         | 0.52       | 1.36                | 2.81                  | 0                    | -0.24        | -0.09                | 1.32        | -0.31                           | 2.83   | 0.65   | 0.61  | 0.24  | 0.02     | -0.2    | -0.39    |       |
|                 |                       | 1.65                     | 0.63                              | 0.54                       | 1.02                     | 0.74  | 3.44                        | 1.77                         | 1.11                | 2.25        | 3               | 2.4        | 3.62              | 3.2          | 3.56       | 3.98                | 3.66                  | 0.33                 | -0.24        | -0.25                | 3.22        | -0.28                           | 9.38   | 3.2    | 0.41  | 0.13  | 0.04     | -0.19   | 0.03     |       |
| TB-AML1_1_AML10 | CBF-AML<br>inv(16)    | 0.64                     | 0.55                              | 0.3                        | 0.75                     | 0.34  | 0.06                        | -0.07                        | 0.51                | 0.86        | 0.97            | 0.98       | 0.91              | 0.75         | 1.03       | 1.39                | 2.18                  | 0.38                 | 0            | 0                    | 1.4         | -0.05                           | 3.13   | 0.96   | 0.11  | 0     | 0.22     | 0       | 1.83     |       |
|                 |                       | 0.21                     | 0.23                              | 0.18                       | 0.31                     | 0.2   | 0.35                        | -0.19                        | 0.16                | 0.65        | 0.43            | 0.42       | 0.46              | 0.32         | 1.31       | 1.27                | 3.12                  | 0.43                 | -0.27        | -0.38                | 0.26        | -0.27                           | 1.97   | 0.22   | 0.16  | -0.38 | -0.03    | -0.15   | 0.46     |       |
|                 |                       | 0.59                     | 0.36                              | 0.26                       | 0.35                     | 0.64  | 0.58                        | 0.33                         | 0.65                | 0.18        | 0.39            | 0.7        | 0.91              | 1.05         | 1.27       | 3.06                | 3.82                  | 0.05                 | -0.01        | -0.1                 | 0.74        | -0.23                           | 2.09   | 0.5    | 0.51  | 0.23  | 0.72     | -0.02   | -0.54    |       |
| TB-AML2_1_AP4   | APL t(15;17)          | 0.31                     | 0.28                              | -0.06                      | 0.32                     | -0.07 | -0.04                       | -0.04                        | 0.23                | 0.41        | 0.15            | 0.36       | 0.52              | 0.63         | 0.83       | 1.77                | 3.1                   | 0.4                  | -0.1         | -0.09                | 0.15        | -0.3                            | 2.66   | 0.51   | -0.03 | -0.03 | 0.52     | 0.06    | X        |       |
|                 |                       | -0.06                    | -0.1                              | -0.23                      | -0.08                    | -0.45 | -0.11                       | -0.23                        | -0.13               | -0.03       | 0.11            | 0.17       | 0.74              | 0.36         | 0.67       | 1.64                | 2.22                  | -0.08                | -0.16        | -0.07                | 0.63        | -0.18                           | 1.5    | 0.66   | -0.24 | 0.19  | -0.13    | -0.07   | -0.03    |       |
|                 |                       | 0.75                     | 0.14                              | -0.04                      | 0.51                     | 0.23  | 0.63                        | 0.46                         | 0.66                | 0.43        | 0.74            | 0.56       | 1                 | 0.82         | 0.82       | 1.44                | 2.09                  | 0                    | -0.25        | -0.2                 | 0.95        | -0.29                           | 0.73   | 0      | -0.38 | -0.15 | 0.15     | -0.16   | 1.07     |       |
| TB-AML1_1_AML27 | FLT3-ITD+<br>NK-AML   | 0                        | -0.04                             | -0.18                      | -0.01                    | -0.16 | -0.09                       | -0.1                         | 0                   | 0.12        | 0               | 0          | 0.43              | 0.42         | 0.69       | 1.64                | 2.95                  | 0                    | -0.13        | -0.29                | 0.2         | -0.1                            | 1.87   | 0.3    | -0.19 | 0.37  | 0.15     | -0.1    | 0.96     |       |
|                 |                       | 0                        | -0.17                             | -0.23                      | -0.11                    | -0.07 | -0.11                       | -0.02                        | 0.09                | 0.33        | 0.17            | 0.25       | 0.43              | 0.48         | 0.45       | 0.48                | 1.18                  | 0.17                 | -0.22        | -0.26                | 0.68        | -0.17                           | 2.2    | 0.35   | -0.03 | -0.13 | 0.22     | -0.05   | 4.59     |       |
|                 |                       | 0.21                     | 0.05                              | -0.13                      | 0.11                     | 0.07  | 0.17                        | 0.17                         | 0.39                | 0.53        | 0.49            | 0.77       | 0.62              | 0.5          | 0.76       | 1.8                 | 2.74                  | 0.46                 | 0.2          | -0.27                | -0.22       | -0.28                           | 0.85   | -0.02  | -0.04 | 0.26  | 0.87     | -0.1    | -0.46    |       |
|                 |                       | 0.51                     | 0.31                              | 0.16                       | 0.35                     | 0.46  | 0.22                        | 0.38                         | 0.54                | 1.06        | 1.29            | 0.92       | 2.16              | 1.93         | 2.87       | 6.7                 | 5.77                  | 0.15                 | -0.18        | -0.25                | 0.32        | -0.21                           | 5.05   | 0.27   | -0.14 | 0.05  | 0.57     | -0.1    | 0.49     |       |
|                 |                       | 1.14                     | 0.55                              | 0.33                       | 0.56                     | 0.23  | 0.29                        | 0.29                         | 0.37                | 0.54        | 1.01            | 1.21       | 2                 | 2.59         | 4.3        | 7.22                | 5.35                  | 0.47                 | -0.05        | -0.29                | 0.63        | -0.19                           | 3.62   | 1.59   | -0.16 | 0.18  | 0.4      | -0.07   | 2.68     |       |
|                 |                       | 0.36                     | -0.09                             | 0.41                       | -0.12                    | -0.17 | 0.8                         | 0.66                         | -0.15               | -0.13       | -0.08           | 0.15       | 1.71              | 1.47         | 2.06       | 3.38                | 3.56                  | 0.44                 | -0.07        | 0.01                 | 1.29        | -0.16                           | 4.7    | 0.85   | -0.12 | -0.15 | -0.32    | -0.01   | 1.34     |       |
|                 |                       | 0.51                     | -0.13                             | 0.18                       | -0.22                    | 0.63  | 0.18                        | -0.16                        | -0.05               | 0           | 0.27            | 0.44       | 1.08              | 1.9          | 2.97       | 6.96                | 7.48                  | 0.23                 | -0.28        | -0.37                | 1.16        | -0.21                           | 2.09   | 1.48   | -0.28 | -0.32 | 0.5      | -0.19   | X        |       |
|                 |                       | 1.33                     | 0.29                              | 0.09                       | 0.33                     | 0.56  | 0.55                        | 0.16                         | 0.62                | 0.67        | 0.48            | 0.5        | 1.5               | 2.82         | 2.31       | 2.85                | 2.89                  | 0.65                 | -0.29        | -0.31                | 0.76        | -0.26                           | 1.1    | 0.28   | -0.12 | 0.13  | -0.09    | -0.09   | 0.84     |       |
|                 |                       | 0.72                     | 0.55                              | 0.48                       | 0.63                     | 0.67  | 0.72                        | 0.49                         | 0.63                | 0.55        | 0.31            | 2.23       | 1.22              | 1.61         | 3.59       | 8.54                | 9.19                  | 0.14                 | -0.08        | 0.12                 | 3.89        | -0.23                           | 3.89   | 4.69   | -0.31 | 0.09  | 0.29     | 0.13    | 2.88     |       |
|                 |                       | -0.06                    | -0.1                              | -0.23                      | -0.08                    | -0.45 | -0.11                       | -0.23                        | -0.13               | -0.03       | 0.11            | 0.17       | 0.74              | 0.36         | 0.67       | 1.64                | 2.22                  | -0.08                | -0.16        | -0.07                | 0.63        | -0.18                           | 1.5    | 0.66   | -0.24 | 0.19  | -0.13    | -0.07   | -0.03    |       |
|                 |                       | 0.23                     | -0.12                             | -0.15                      | -0.04                    | 0.18  | 0.07                        | -0.21                        | 0.51                | 1.06        | 1.18            | 1.52       | 1.85              | 4.38         | 4.35       | 6.2                 | 5.57                  | -0.09                | -0.23        | -0.35                | 0.65        | -0.26                           | 1.54   | 0.09   | 1.52  | -0.07 | -0.09    | -0.15   | 0.19     |       |
|                 |                       | TB-AML2_1_AML31          | FLT3-TKD+<br>NK-AML               | 0.63                       | 0.64                     | 0.41  | 0.7                         | 0.45                         | 0.45                | 0.6         | 0.6             | 0.95       | 0.64              | 1.26         | 0.31       | 1.06                | 1.4                   | 2.54                 | 3.32         | -0.07                | 0.2         | -0.06                           | 0.6    | -0.28  | 2.46  | 0.41  | -0.11    | 0.08    | -0.29    | -0.14 |
| 1.57            | 0.41                  |                          |                                   | 0.32                       | 0.68                     | 1.97  | 1.51                        | 0.64                         | 1.5                 | 1.14        | 1.55            | 1.67       | 1.92              | 2.72         | 4.57       | 5.99                | 5.41                  | 2.73                 | -0.19        | -0.35                | 2.93        | -0.14                           | 4.41   | 1.46   | -0.21 | 0.5   | 0.08     | -0.12   | 2.84     |       |
| 1.17            | 0.39                  |                          |                                   | 0.25                       | 1.16                     | 0.7   | 0.53                        | -0.25                        | -0.08               | 0.29        | 0.62            | 0.6        | 1.21              | 3.98         | 2.27       | 2.87                | 5.05                  | 0.15                 | -0.22        | -0.26                | 0           | -0.23                           | 1.74   | 0.66   | -0.22 | -0.13 | 0.34     | -0.11   | 0.66     |       |
| TB-AML1_1_AML13 | FLT3wt<br>NK-AML      | 0.86                     | 1.13                              | 0.91                       | 1.81                     | 1.45  | 0.72                        | 0                            | 0.95                | 1.4         | 0.77            | 0.86       | 0.67              | 1.03         | 1.46       | 2.86                | 4.1                   | -0.05                | -0.08        | -0.2                 | 2.9         | 0                               | 0.58   | 0.53   | -0.06 | 0     | 1.07     | -0.04   | 0        |       |
|                 |                       | 0.96                     | -0.17                             | -0.23                      | -0.1                     | -0.15 | 0.02                        | -0.08                        | 0.1                 | 0.44        | 0.39            | 0.32       | 0.3               | 1.47         | 1.38       | 1.86                | 4.15                  | 0.01                 | -0.24        | -0.32                | -0.17       | -0.25                           | 1.14   | -0.02  | -0.23 | -0.01 | -0.14    | -0.11   | 0.77     |       |
|                 |                       | 0.01                     | 0.23                              | 0.19                       | 1.09                     | 0.2   | -0.19                       | -0.22                        | -0.06               | 0.2         | 0.04            | 0.2        | 0.21              | 0.46         | 0.28       | 1.28                | 2.37                  | -0.16                | -0.21        | -0.25                | 1.65        | -0.28                           | -0.08  | -0.05  | -0.3  | X     | -0.19    | -0.22   | 0.29     |       |
|                 |                       | -0.04                    | 0.3                               | 0.22                       | 0.94                     | -0.02 | -0.13                       | -0.19                        | 0.28                | 0.93        | 0.63            | 0.62       | 0.21              | 0.79         | 0.67       | 0.97                | 1.52                  | -0.22                | -0.23        | -0.31                | -0.19       | -0.31                           | 0.7    | -0.08  | -0.54 | -0.32 | -0.24    | -0.25   | -0.1     |       |
|                 |                       | -0.01                    | 0                                 | -0.02                      | 0.45                     | 0.34  | -0.21                       | -0.27                        | 0.15                | 0.38        | 0.31            | 0.58       | 0.37              | 0.6          | 0.37       | 1.53                | 2.06                  | -0.11                | -0.24        | -0.24                | -0.22       | 0.3                             | 0.63   | -0.01  | -0.17 | 0.23  | 0.02     | -0.2    | 0.5      |       |
|                 |                       | 0.33                     | 0.53                              | 0.52                       | 0.62                     | 0.25  | -0.13                       | -0.2                         | 0.48                | 1.3         | 1.26            | 1          | 0.45              | 1.62         | 1.61       | 3.84                | 4.81                  | 0.31                 | -0.19        | -0.33                | 1.28        | -0.26                           | 1.93   | 0.63   | -0.37 | 2.08  | -0.22    | -0.19   | 0.15     |       |
| TB-AML2_1_AML22 | ADK-AML<br>Cmplx/Mono | -0.27                    | -0.35                             | -0.32                      | -0.35                    | -0.34 | -0.35                       | -0.35                        | -0.34               | -0.22       | -0.15           | 0.11       | 0.24              | 0.07         | 0.61       | 0.55                | 0.79                  | 0.15                 | -0.23        | -0.33                | -0.24       | -0.17                           | 0.99   | 1.1    | 0.83  | -0.03 | 0.02     | 0.31    | 1.43     |       |
|                 |                       | 0.02                     | -0.01                             | -0.09                      | 0                        | -0.12 | 0.08                        | -0.16                        | 0                   | 0.3         | 0.43            | 0.44       | 0.53              | 0.33         | 0.58       | 0.87                | 2.23                  | 0.44                 | -0.09        | -0.2                 | -0.03       | -0.11                           | 2.56   | 0.37   | -0.16 | 0.33  | 0        | -0.04   | 1.27     |       |
|                 |                       | -0.09                    | -0.13                             | -0.22                      | -0.08                    | -0.22 | -0.03                       | -0.24                        | -0.22               | 0.05        | 0.06            | 0.06       | 0.11              | -0.14        | 0.48       | 0.44                | 0.68                  | -0.11                | -0.12        | -0.36                | 0.55        | -0.23                           | 0.58   | 0      | -0.05 | -0.11 | -0.02    | -0.14   | 1.38     |       |
|                 |                       | 0.05                     | 0                                 | -0.15                      | 0.2                      | -0.15 | -0.21                       | -0.22                        | 0.25                | 0.58        | 0.23            | 0.48       | 0.79              | 0.96         | 1.4        | 1.1                 | 2.49                  | -0.04                | -0.22        | -0.34                | -0.1        | -0.21                           | 0.24   | 0.08   | -0.22 | -0.13 | 4.03     | -0.17   | 0.17     |       |
|                 |                       | -0.01                    | -0.23                             | -0.27                      | -0.05                    | -0.18 | -0.16                       | -0.21                        | -0.2                | -0.07       | 0.07            | 0.19       | 0.48              | 0.33         | 0.45       | 0.66                | 1.08                  | -0.16                | -0.24        | -0.32                | 0.68        | -0.21                           | 0.22   | 0      | -0.38 | -0.36 | -0.27    | -0.18   | 0.12     |       |
|                 |                       | 0.44                     | 0.15                              | -0.02                      | 0.66                     | 0     | 0.26                        | -0.26                        | 0.3                 | 0.88        | 0.72            | 0.81       | 0.47              | 1.01         | 1.21       | 1.29                | 1.74                  | -0.05                | -0.32        | -0.36                | 0.06        | -0.27                           | 1.36   | 0.5    | 0.33  | 0.55  | 0.68     | -0.15   | 0.1      |       |
| TB-AML4_1_AML4  | Healthy Donors        | 1.96                     | 1.64                              | 0.93                       | 5                        | 0.27  | -0.08                       | -0.17                        | 0.45                | 1.15        | 1.11            | 1.03       | 1.92              | 1.98         | 2.38       | 7.63                | 8.15                  | -0.1                 | -0.24        | -0.3                 | 1.54        | -0.23                           | 1.87   | 1.14   | -0.1  | -0.19 | -0.05    | -0.16   | 0.34     |       |
|                 |                       | 1.12                     | 0.42                              | 0.05                       | 1.01                     | 0.32  | 0                           | -0.09                        | -0.01               | 0.19        | 0.79            | 0.48       | 0.68              | 1.69         | 0.97       | 0.98                | 1.95                  | -0.01                | -0.12        | -0.14                | -0.1        | -0.12                           | 0.92   | 0.08   | -0.01 | -0.01 | 0.11     | -0.07   | 1.32     |       |
|                 |                       | 1.22                     | 0.2                               | 0                          | 0.57                     | 0     | 0.3                         | -0.03                        | -0.08               | 0.32        | 0.72            | 0.67       | 0.72              | 0.9          | 0.85       | 1.34                | 2.47                  | 0.09                 | -0.02        | -0.12                | -0.08       | -0.09                           | 1.15   | 0.21   | 0.1   | 0.4   | 0.31     | 0       | 0.73     |       |
|                 |                       | 1.23                     | 0.6                               | 0.37                       | 1.25                     | 0.15  | 0.37                        | 0                            | 0                   | 0.44        | 0.74            | 0.86       | 0.83              | 0.96         | 0.84       | 1.28                | 3.38                  | 0                    | -0.09        | -0.09                | -0.05       | -0.03                           | 1.3    | 0.15   | 0     | 0.09  | 0.2      | -0.2    | 0.02     | 0.71  |
|                 |                       | 1.83                     | 0.59                              | 0.44                       | 0.99                     | 0.23  | 1.58                        | 0.25                         | 0.14                | 1.43        | 2.39            | 1.69       | 1.59              | 1.79         | 0.99       | 1.44                | 3.85                  | 0.19                 | -0.06        | -0.14                | -0.11       | -0.15                           | 1.96   | 0.7    | -0.09 | -0.22 | 0        | -0.01   | 0.13     |       |
|                 |                       | 1.46                     | 0.29                              | 0.19                       | 0.34                     | 0.07  | 1.16                        | 0.43                         | -0.04               | 0.98        | 1.5             | 0.87       | 1.47              | 1.51         | 0.9        | 1.34                | 3.2                   | 0.13                 | -0.16        | -0.18                | -0.22       | -0.27                           | 1.3    | 0.29   | -0.23 | -0.33 | -0.09    | -0.16   | 0.5      |       |
|                 |                       | 1.14                     | 0.04                              | -0.1                       | 0.58                     | -0.13 | 0.11                        | -0.08                        | -0.2                | 0.13        | 0.35            | 0.29       | 0.4               | 0.87         | 0.89       | 1.44                | 2.27                  | 0.08                 | -0.14        | -0.21                | -0.23       | -0.23                           | 0.67   | -0.03  | -0.25 | -0.05 | 0.11     | -0.17   | 0.72     |       |
|                 |                       | 0.93                     | 0.03                              | -0.12                      | 0.6                      | -0.16 | 0.2                         | 0.13                         | -0.21               | 0.13        | 0.48            | 0.35       | 0.52              | 0.78         | 0.65       | 1.04                | 1.97                  | -0.01                | -0.15        | -0.18                | -0.18       | -0.25                           | 1.15   | -0.03  | -0.22 | -0.14 | -0.05    | -0.12   | 0.83     |       |
|                 |                       | 1.48                     | 0.3                               | 0.21                       | 0.62                     | -0.05 | 0.87                        | 0.33                         | 0.03                | 1.08        | 1.7             | 0.83       | 1.16              | 1.45         | 0.94       | 1.62                | 3.38                  | 0.13                 | -0.18        | -0.21                | -0.21       | -0.3                            | 1.37   | 0.31   | -0.25 | -0.23 | -0.17    | -0.18   | 0.16     |       |
|                 |                       | 0.97                     | 0.01                              | -0.03                      | 0.31                     | -0.18 | 0.04                        | -0.02                        | -0.24               | 0.22        | 0.53            | 0.43       | 0.53              | 0.87         | 0.76       | 1.29                | 2.32                  | 0.01                 | -0.16        | -0.19                | -0.2        | -0.27                           | 0.73   | -0.05  | -0.31 | -0.05 | 0.08     | -0.19   | 1.26     |       |
|                 |                       | 0.95                     | 0.26                              | 0.08                       | 0.94                     | -0.07 | 0.27                        | -0.06                        | -0.11               | 0.24        | 0.46            | 0.47       | 0.45              | 0.95         | 0.96       | 1.7                 | 3                     | -0.12                | -0.22        | -0.22                | -0.17       | -0.23                           | 0.86   | -0.08  | -0.2  | -0.01 | -0.05    | -0.2    | 0.71     |       |
|                 |                       | 1.33                     | 0.15                              | 0.09                       | 0.44                     | 0.06  | 1.06                        | 0.19                         | -0.05               | 0.87        | 1.34            | 0.77       | 1.26              | 1.37         | 0.77       | 1.48                | 2.97                  | 0.04                 | -0.19        | -0.23                | -0.24       | -0.3                            | 1.19</ |        |       |       |          |         |          |       |

|                       |       | pNFKB Median             |                                        |                                  |       |                                     |                      |                     |              |                 |            |                   |              |            |                     |                       |                      |              |                      |             |                                 |        |        |         |       |          |         |          |
|-----------------------|-------|--------------------------|----------------------------------------|----------------------------------|-------|-------------------------------------|----------------------|---------------------|--------------|-----------------|------------|-------------------|--------------|------------|---------------------|-----------------------|----------------------|--------------|----------------------|-------------|---------------------------------|--------|--------|---------|-------|----------|---------|----------|
|                       |       | CD34+CD38 <sup>low</sup> | HSC/MPP-<br>CD33negCD38 <sup>low</sup> | CMP-<br>CD34+CD38 <sup>low</sup> | GMP   | 34negCD38 <sup>low</sup><br>+Undiff | 34neg38neg<br>Undiff | Myelo/Mono<br>blast | ProMonoocyte | CD14neg<br>Mono | CD14+ Mono | 11b+DRneg<br>Mono | ProMyelocyte | Myelocytes | Meta-<br>myelocytes | Mature<br>Granulocyte | Pro-<br>erythroblast | Erythroblast | Late<br>Erythroblast | Pre-B Cells | Mature B<br>cells<br>CD20+CD19+ | Plasma | T Cell | pDC     | mDC   | Basophil | NK Cell | Platelet |
| CBF-AML<br>t(8;21)    | 1.31  | 0                        | -0.05                                  | 0.46                             | -0.04 | 0.4                                 | 0.18                 | 0.17                | 0.86         | 0.34            | 0.01       | 0.89              | 1.95         | 2.62       | 2.17                | 1.75                  | 0                    | -0.03        | -0.12                | 0.81        | 0                               | 0      | 0.76   | 0.6     | 0.3   | 1.06     | 0.21    | 1.12     |
|                       | 0.81  | -0.09                    | -0.13                                  | 0.11                             | -0.09 | 0.24                                | 0.54                 | 0.2                 | 1.32         | 1.07            | 0.91       | 1.02              | 1.99         | 2.53       | 2.06                | 1.8                   | -0.32                | -0.21        | -0.17                | 0.81        | 0.41                            | -0.18  | 1.26   | 4.13    | 0.63  | 1.02     | 0.45    | -1.46    |
|                       | 0.88  | 1.01                     | 0.83                                   | 1.71                             | 0.53  | 0.72                                | 0.54                 | 0.77                | 1.51         | 1.02            | 0.71       | 1.22              | 1.86         | 1.69       | 1.5                 | 1.38                  | -0.29                | -0.22        | -0.27                | 0.77        | 0.63                            | -0.28  | 1.32   | 0.83    | 2.29  | 1.69     | 0.95    | 0.91     |
| CBF-AML<br>inv(16)    | 1.02  | 1.19                     | 0.96                                   | 1.43                             | 0.97  | 0.7                                 | 0.53                 | 1                   | 1.48         | 0.82            | 0.67       | 0.98              | 1.93         | 2.23       | 1.36                | 1.46                  | 0.09                 | 0            | 0                    | 1.39        | 0.71                            | -0.2   | 1.42   | 0.8     | 0.52  | 0.89     | 0.71    | 2.03     |
|                       | 1.08  | 1.28                     | 1.2                                    | 1.38                             | 0.84  | -0.05                               | -0.08                | 1.02                | 2.1          | 1.61            | 1.48       | 2.21              | 1.17         | 2.49       | 1.87                | 1.32                  | 0.05                 | -0.21        | -0.19                | 0.38        | 0.48                            | -0.25  | 1.48   | 1.46    | 1.04  | 0.54     | 0.74    | 2.57     |
|                       | 0.77  | 1.45                     | 1.19                                   | 2.18                             | 1.19  | 0.68                                | 0.54                 | 0.86                | 1.15         | 0.92            | -0.07      | 1.23              | 1.43         | 1.63       | 1.11                | 0.75                  | -0.27                | -0.13        | 0.26                 | 0.87        | 0.41                            | -0.34  | 1.08   | 1.61    | 0.87  | 1.12     | 0.67    | 1.12     |
| APL t(15;17)          | 1.27  | 1.74                     | 1.01                                   | 1.83                             | 0.84  | 0.59                                | 0.61                 | 1.04                | 2.27         | 1.59            | 0.22       | 1.81              | 1.88         | 2.67       | 1.38                | 1.15                  | -0.03                | -0.18        | 0.45                 | 1.07        | 0.41                            | -0.59  | 0.99   | -0.23   | 1.3   | 2.55     | 0.87    | X        |
|                       | 1.34  | 1.44                     | 1.4                                    | 1.7                              | 0.91  | 0.7                                 | 0.71                 | 1.06                | 0.54         | 0.05            | 0.32       | 1.62              | 1.85         | 2.64       | 2.55                | 2.37                  | -0.02                | -0.19        | -0.16                | 0.59        | 0.5                             | -0.2   | 0.93   | -0.24   | 0.83  | 2.06     | 0.55    | 2        |
|                       | 1.41  | 1.97                     | 1.13                                   | 2.12                             | 0.75  | 0.84                                | 1.5                  | 0.86                | 2.17         | 1.92            | 0          | 1.84              | 1.85         | 2.9        | 1.71                | 1                     | 0.01                 | -0.14        | -0.07                | 0.6         | 0.59                            | -0.2   | 1.04   | 0.8     | 1.17  | 2.19     | 0.59    | 4.6      |
| FLT3-ITD+<br>NK-AML   | 0.5   | 0.86                     | 0.33                                   | 1.14                             | 0.31  | 0.35                                | 1.14                 | 0.48                | 1.04         | 0.72            | 0.64       | 1.1               | 1.31         | 1.48       | 1.17                | 0.81                  | 0.7                  | -0.1         | -0.1                 | 1.09        | 0.78                            | -0.23  | 1.3    | 22.64   | 0.68  | 0.78     | 0.79    | 5.26     |
|                       | 2.21  | 2.7                      | 1.93                                   | 2.81                             | 1.54  | 0.97                                | 1.54                 | 2                   | 2.87         | 1.08            | 0.7        | 2.7               | 2.72         | 3.12       | 2.06                | 1.67                  | 0.76                 | 0.05         | -0.1                 | 0.36        | 0.4                             | -0.16  | 1.36   | 0.6     | 1.57  | 3.14     | 0.51    | 2.23     |
|                       | 0.91  | 2.07                     | 1.56                                   | 2.16                             | 0.82  | 0.55                                | 1.15                 | 0.56                | 1.55         | 1               | 0.63       | 1.01              | 2.07         | 2.36       | 1.45                | 1.53                  | 0.16                 | -0.18        | -0.17                | 0.58        | 0.6                             | -0.3   | 1.27   | 0.72    | 1.26  | 0.71     | 0.88    | 6.84     |
| NK-AML                | 0.69  | 1.98                     | 1.46                                   | 2.04                             | 0.94  | 0.84                                | 1.12                 | 1.15                | 1.78         | 0.59            | -0.02      | 1.01              | 2.03         | 2.33       | 1.27                | 1.25                  | 1.89                 | -0.13        | 0.08                 | 1.01        | 0.54                            | -0.24  | 0.93   | 1.75    | 0.25  | -0.02    | 0.23    | 2.61     |
|                       | 0.19  | 0.57                     | 0.68                                   | 0.57                             | -0.08 | 0.79                                | 0.83                 | -0.1                | 0.02         | -0.12           | -0.15      | 1.61              | 2.48         | 2.98       | 2.01                | 2.59                  | 0.6                  | -0.23        | -0.07                | 0.93        | 0.54                            | -0.3   | 0.92   | 0.3     | -0.22 | 1.34     | 0.3     | 3.38     |
|                       | 0.65  | 1.41                     | 1.52                                   | 1.36                             | 0.41  | -0.06                               | 0.15                 | -0.02               | 0.79         | 0.79            | 0.48       | 0.4               | 0.72         | 1.25       | 1.06                | 1.15                  | -0.29                | -0.14        | -0.25                | -0.18       | 0.75                            | -0.29  | 1.18   | -0.03   | 0.77  | 0.47     | 0.54    | X        |
| FLT3-TKD+<br>NK-AML   | 3.61  | 2.35                     | 1.82                                   | 2.47                             | 1.68  | 0.79                                | 1.53                 | 2.04                | 2.57         | 1.18            | 0.93       | 4.7               | 7.9          | 6.23       | 5.23                | 5.29                  | 1.58                 | -0.03        | -0.16                | 0.9         | 0.79                            | -0.2   | 1.46   | 1.66    | 1.78  | 1.66     | 1.37    | 4.5      |
|                       | 2.27  | 3.02                     | 3                                      | 3.05                             | 2.85  | 1.76                                | 2.11                 | 2.7                 | 2.92         | 0.76            | 0.26       | 1.96              | 2.7          | 2.2        | 0.74                | 0.77                  | 0.84                 | -0.17        | 0.26                 | 2.34        | 0.24                            | -0.35  | 0.65   | 0.05    | -0.05 | 0.74     | 0.8     | 1.36     |
|                       | 0.58  | 2.25                     | 0.93                                   | 2.3                              | 0.85  | 0.49                                | 0.12                 | 0.88                | 2.29         | 1.22            | 0.83       | 2.11              | 2.62         | 3.04       | 2.46                | 2.83                  | -0.08                | -0.19        | -0.23                | 1.11        | 0.48                            | -0.31  | 0.77   | 1.51    | 1.15  | 0.54     | 2.02    | 0.53     |
| FLT3-TKD+<br>NK-AML   | 0.43  | 0.85                     | 0.58                                   | 1.85                             | 0.81  | -0.04                               | 0.03                 | 0.33                | 1.35         | 0.6             | 0.26       | 0.97              | 1.06         | 1.4        | 1.37                | 1.44                  | 0.39                 | -0.19        | -0.28                | 0.52        | 0.05                            | -0.3   | 0.83   | 1.45.81 | 0.98  | -0.1     | 0.3     | 1.47     |
|                       | 1.63  | 2.42                     | 2.25                                   | 2.49                             | 1.23  | 1.11                                | 1.73                 | 1.52                | 2.29         | 1.69            | 1.3        | 1.47              | 2.26         | 3.37       | 1.69                | 0.9                   | 0.78                 | 0.48         | 0.53                 | 1.13        | 0.46                            | -0.21  | 1.07   | 1.88    | 1.49  | 1.28     | 0.44    | 4.21     |
|                       | 1.15  | 1.48                     | 1.27                                   | 1.6                              | 1.16  | 0.95                                | 1.5                  | 1.17                | 1.76         | 1.43            | 0.98       | 1.07              | 2.52         | 6.38       | 4.11                | 6.81                  | 0.68                 | -0.15        | -0.33                | 1.72        | 0.97                            | -0.15  | 1.64   | 0.68    | 1.42  | 1.61     | 1.4     | 2.79     |
| FLT3wt<br>NK-AML      | 1.46  | 1.73                     | 1.35                                   | 2.14                             | 0.65  | 0.19                                | -0.08                | 0.27                | 0.87         | 0.92            | 0.79       | 0.49              | 1.88         | 1.92       | 1.6                 | 1.53                  | 0.02                 | -0.22        | -0.05                | -0.03       | 1.33                            | -0.14  | 1.19   | 0.03    | 1.05  | 0.13     | 0.68    | 4.06     |
|                       | 0.91  | 1.22                     | 0.98                                   | 1.7                              | 1.05  | 0.58                                | 0.25                 | 0.95                | 1.51         | 0.61            | 0.46       | 0.2               | 2.15         | 2.87       | 1.67                | 2.11                  | -0.07                | -0.11        | -0.08                | 1.98        | 0.7                             | -0.08  | 1.09   | 0.05    | 0     | 2.46     | 0.74    | 1.07     |
|                       | 0.8   | 0.79                     | 0.74                                   | 0.86                             | 0.29  | -0.01                               | 0.1                  | 0.44                | 0.99         | 0.44            | -0.02      | 0.53              | 2.5          | 3.19       | 1.79                | 1.28                  | 0.38                 | -0.17        | -0.25                | -0.16       | 0.31                            | -0.29  | 1.33   | 0.67    | 1.27  | 0.55     | 0.51    | 3.34     |
| ADK-AML<br>Cmplx/Mono | 0.41  | 1.26                     | 0.7                                    | 2.48                             | 0.56  | 0.07                                | 0.08                 | 0.69                | 1.21         | 0.54            | 0.5        | 0.26              | 1.19         | 0.96       | 0.66                | 0.75                  | -0.03                | -0.13        | -0.17                | 1.98        | 0.26                            | -0.26  | 0.79   | 0.57    | X     | 1.39     | 0.34    | 1.27     |
|                       | 0.45  | 0.45                     | 0.34                                   | 1.81                             | 0.18  | -0.03                               | -0.09                | 0.84                | 1.49         | 0.89            | 1.38       | 0.68              | 1.12         | 1.48       | 1.08                | 1.17                  | -0.21                | -0.23        | -0.27                | 1.08        | 0.19                            | -0.28  | 0.83   | 1.05    | -0.06 | 0.58     | 0.5     | 0.78     |
|                       | 0.49  | 0.46                     | 0.42                                   | 1.22                             | 0.51  | -0.13                               | -0.04                | 0.28                | 0.97         | 0.48            | 0.77       | 0.52              | 1.46         | 1.57       | 1.98                | 2.11                  | -0.18                | -0.22        | -0.21                | 1.08        | -0.19                           | -0.26  | 0.83   | 0.97    | 2.07  | 0.92     | 0.18    | 2.84     |
| MLL t(10;11)          | 0.6   | 0.51                     | 0.34                                   | 0.85                             | 0.29  | 0.18                                | 0.41                 | 0.65                | 1.05         | 0.66            | 0.3        | 0.76              | 0.91         | 2.03       | 0.74                | 0.54                  | -0.09                | -0.16        | -0.17                | 2.11        | 0.26                            | -0.2   | 1.09   | 0.32    | 1.07  | 0.72     | 0.58    | 1.54     |
|                       | -0.14 | -0.27                    | -0.2                                   | -0.29                            | -0.28 | -0.28                               | -0.28                | -0.23               | 0.55         | 0.78            | 0.54       | 1.63              | 0.89         | 1.76       | 1.44                | 1.21                  | 0.18                 | -0.18        | -0.19                | -0.18       | 0.61                            | -0.26  | 1.04   | 557.17  | 0.98  | 0.28     | 0.27    | 5.93     |
|                       | 0.78  | 1.09                     | 0.8                                    | 1.27                             | 0.27  | 0.23                                | 0.51                 | 0.43                | 1.25         | 0.73            | 0.11       | 1.26              | 1.66         | 2.55       | 2.22                | 1.95                  | 0.56                 | 0            | -0.03                | 0           | 0.7                             | -0.33  | 1.65   | 0       | 1.4   | 0.7      | 0.62    | 6.58     |
| ADK-AML<br>Cmplx/Mono | 0.71  | 0.69                     | 0.32                                   | 0.87                             | 0.2   | 0.08                                | 0.34                 | 0.21                | 1.18         | 1.06            | 0.27       | 1.57              | 0.77         | 1.83       | 1.18                | 1.06                  | -0.1                 | -0.17        | -0.29                | 1.34        | 0.54                            | -0.26  | 1.03   | 1.66    | 1.49  | 1.2      | 0.65    | 3.87     |
|                       | 1.25  | 1.74                     | 1.18                                   | 2.14                             | 0.52  | 0.16                                | 0.42                 | 1.07                | 2.08         | 1.56            | 1.63       | 1.98              | 2.3          | 2.47       | 2.08                | 1.39                  | 0.24                 | -0.17        | -0.07                | 0.58        | 0.55                            | -0.27  | 1.05   | 0.77    | -0.01 | 4.7      | 0.4     | 1.44     |
|                       | 0.66  | 0.59                     | 0.39                                   | 1.38                             | 0.31  | -0.1                                | 0.19                 | 0.08                | 0.96         | 1.03            | 0.82       | 0.61              | 1.06         | 1.44       | 1.14                | 1.2                   | -0.1                 | -0.18        | -0.28                | 0           | 0.61                            | -0.22  | 0.82   | 1.1     | 0.09  | -0.03    | 0.29    | 1.89     |
| Healthy Donors        | 0.96  | 0.68                     | 0.5                                    | 1.5                              | 0.38  | -0.07                               | -0.07                | 0.51                | 1.24         | 0.75            | 1.28       | 0.69              | 1.6          | 2.48       | 1.91                | 1.85                  | 0.24                 | -0.15        | -0.15                | 0.25        | 0.62                            | -0.24  | 1.48   | 1.64    | 3.66  | 0.67     | 0.68    | 1.58     |
|                       | 2.42  | 1.73                     | 1.38                                   | 2.24                             | 0.58  | 0.33                                | 0.57                 | 0.37                | 0.94         | 0.91            | 0.63       | 0.73              | 3.37         | 3.69       | 2.74                | 2.31                  | 0.53                 | -0.07        | -0.13                | 0.1         | 0.69                            | -0.18  | 1.63   | 0.99    | 1.3   | 1.15     | 0.99    | 4.03     |
|                       | 2.15  | 1.83                     | 1.72                                   | 2.03                             | 0.61  | 0.33                                | 0                    | 0.54                | 1.03         | 0.97            | 0.77       | 0.84              | 2.62         | 3.04       | 2.66                | 2.37                  | 0.46                 | -0.16        | -0.2                 | 0.08        | 0.39                            | -0.19  | 1.69   | 0.88    | 1.3   | 0.82     | 1.04    | 2.03     |
| CR / CRI              | 3.01  | 1.49                     | 1.12                                   | 2.07                             | 0.58  | 0.3                                 | 0.09                 | 0.35                | 1.17         | 1.15            | 0.84       | 1.03              | 3.68         | 4.08       | 3.55                | 3.32                  | 0.5                  | -0.06        | -0.21                | 0.14        | 0.67                            | -0.17  | 1.72   | 0.91    | 1.66  | 1.55     | 1.04    | 3.74     |
|                       | 2.4   | 1.78                     | 1.3                                    | 3.11                             | 0.74  | 0.28                                | -0.08                | 0.86                | 1.29         | 1.3             | 1.04       | 0.98              | 3.06         | 3.77       | 3.34                | 3.38                  | 0.36                 | -0.19        | -0.24                | -0.01       | 0.8                             | -0.15  | 1.46   | 1.65    | 2.34  | 1.42     | 1.03    | 3.72     |
|                       | 1.72  | 1.2                      | 1.05                                   | 1.54                             | 0.28  | 0.24                                | -0.07                | 0.2                 | 0.64         | 0.69            | 0.45       | 0.63              | 2.03         | 2.42       | 2.19                | 1.96                  | -0.01                | -0.23        | -0.24                | -0.09       | 0.1                             | -0.22  | 1.14   | 0.46    | 1.58  | 0.38     | 0.65    | 2.03     |
| CR / CRI              | 2.49  | 0.99                     | 0.9                                    | 1.16                             | 0.33  | 0.36                                | 0.26                 | 0.31                | 0.77         | 0.65            | 0.54       | 0.61              | 2.76         | 3.54       | 3.17                | 3.01                  | 0.19                 | -0.22        | -0.23                | -0.07       | 0.31                            | -0.08  | 0.99   | 0.77    | 2.16  | 0.89     | 0.86    | 2.71     |
|                       | 2.32  | 0.75                     | 0.7                                    | 1.11                             | 0.36  | 0.13                                | 0.15                 | 0.06                | 0.57         | 0.76            | 0.6        | 0.75              | 2.82         | 3.14       | 2.82                | 2.64                  | 0.25                 | -0.17        | -0.2                 | -0.08       | 0.32                            | -0.19  | 1.15   | 0.54    | 0.64  | 0.83     | 0.7     | 3.09     |
|                       | 1.92  | 0.95                     | 0.91                                   | 1.28                             | 0.24  | 0.01                                | -0.03                | 0.53                | 0.8          | 0.81            | 0.77       | 0.66              | 2.45         | 2.98       | 2.78                | 2.9                   | 0.12                 | -0.24        | -0.25                | -0.09       | 0.45                            | -0.21  | 0.98   | 0.8     | 2.4   | 0.97     | 0.7     | 3.19     |
| CR / CRI              | 0.44  | 0.53                     | 0                                      | 0.87                             | 0.08  | -0.04                               | 0                    | 0                   | 0.37         | 0.12            | 0.06       | 0.37              | 1.21         | 1.24       | 0.97                | 0.99                  | -0.03                | -0.11        | -0.13                | 0           | 0.1                             | -0.23  | 1.08   | 0       | 0.01  | 4.39     | 0.21    | 2.36     |
|                       | 1.75  | 0.51                     | 0.74                                   | 0.43                             | 0.4   | 0.15                                | 0.08                 | -0.12               | 0            | -0.01           | 0          | 0.62              | 3.1          | 3.15       | 2.54                | 2                     | 0.35                 | -0.16        | -0.21                | -0.05       | -0.13                           | -0.19  | 1.38   | 0.24    | 0.36  | 0.62     | 0.33    | 2.96     |
|                       | 0.11  | 0.06                     | -0.09                                  | 1.52                             | 0.08  | -0.29                               | -0.26                | 0.45                | 0.62         | 0.36            | -0.14      | -0.06             | 0.89         | 1.29       | 0.72                | 1.48                  | -0.27                | -0.18        | -0.15                | 0.31        | -0.07                           | -0.13  | 0.32   | -0.22   | 0.05  | 0.35     | 0.15    | 1.2      |
| CR / CRI              | 0.15  | 0.88                     | 0.84                                   | 6.19                             | -0.11 | -0.07                               | -0.22                | 0.46                | 1.14         | 0.23            | 0.34       | 0.27              | 0.74         | 1.04       | -0.1                | -0.21                 | -0.26                | 1.4          | 0.13                 | -0.26       | 0.59                            |        |        |         |       |          |         |          |

**pERK Median**

|                                                                                                                                                                                                                   |                       | CD34-CD38 <sup>+</sup> | HSC/MPP-<br>CD33negCD38 <sup>+</sup><br>4-CD38 <sup>low</sup> | OMP-<br>CD34-CD38 <sup>+</sup><br>cncCD33mid | GMP  | 34negCD38 <sup>+</sup><br>+Undiff | 34neg38neg<br>Undiff | Myelo/Mono<br>blast | ProMonocyte | CD14neg<br>Mono | CD14+ Mono | 11b+DRneg<br>Mono | ProMyelocyte | Myelocytes | Meta-<br>myelocytes | Mature<br>Granulocyte | Pro-<br>erythroblast | Erythroblast | Late<br>Erythroblast | Pre-B Cells | Mature B<br>cells<br>CD20-CD19 <sup>+</sup> | Plasma | T Cell | pDC  | mDC  | Basophil | NK Cell | Platelet |      |      |
|-------------------------------------------------------------------------------------------------------------------------------------------------------------------------------------------------------------------|-----------------------|------------------------|---------------------------------------------------------------|----------------------------------------------|------|-----------------------------------|----------------------|---------------------|-------------|-----------------|------------|-------------------|--------------|------------|---------------------|-----------------------|----------------------|--------------|----------------------|-------------|---------------------------------------------|--------|--------|------|------|----------|---------|----------|------|------|
| TB-AML1_1_AML26<br>TB-AML1_1_AML35<br>TB-AML1_1_AML5                                                                                                                                                              | CBF-AML<br>(R:21)     | 0.08                   | 0.71                                                          | 0.51                                         | 1.59 | 0.64                              | 1.16                 | 0.63                | 1.34        | 2.21            | 1.06       | 0.41              | 0.76         | 0.45       | 0.02                | -0.13                 | -0.17                | 0.21         | 0                    | -0.06       | 0.95                                        | 0      | 0.33   | 0.85 | 1.29 | 0.28     | 0.66    | 0.59     | 3.34 |      |
|                                                                                                                                                                                                                   |                       | 2.9                    | 1.41                                                          | 1.28                                         | 1.98 | 1.45                              | 4.68                 | 9.59                | 2.91        | 5.27            | 2          | 1.61              | 1.64         | 5.98       | 4.4                 | 0.76                  | -0.13                | 0.87         | 0.33                 | -0.08       | 2.21                                        | 0.55   | 0.07   | 2.57 | 1.52 | 0.83     | 0.79    | 2        | 22.7 |      |
|                                                                                                                                                                                                                   |                       | 5.04                   | 5.52                                                          | 5.11                                         | 7.24 | 6.15                              | 9.73                 | 3.6                 | 6.15        | 8.91            | 12.33      | 17.32             | 11.27        | 5.93       | 8.38                | 2.99                  | 0.92                 | 0.41         | 1.64                 | 0.54        | 0.59                                        | 2.96   | 1.72   | 0.66 | 3.56 | 4.1      | 1.64    | 3.13     | 3.73 | 4.48 |
| TB-AML1_1_AML10<br>TB-AML1_1_AML32                                                                                                                                                                                | CBF-AML<br>inv(16)    | 4.71                   | 5.83                                                          | 4.96                                         | 6.53 | 5.06                              | 3.44                 | 2.72                | 5.9         | 6.77            | 3.95       | 2.91              | 2.92         | 5.18       | 2.97                | 0.88                  | 0.49                 | 2.15         | 1.08                 | 0.22        | 3.48                                        | 1.69   | 0.19   | 3.86 | 3.83 | 1.78     | 2.51    | 3.52     | 4.91 |      |
|                                                                                                                                                                                                                   |                       | 6.78                   | 6.79                                                          | 6.71                                         | 7.05 | 7.32                              | 3.47                 | 2.12                | 8.66        | 10.06           | 12.12      | 5.57              | 2.35         | 9.36       | 6.67                | 0.46                  | -0.16                | 1.43         | 0.59                 | 0.74        | 6.19                                        | 1.77   | 0.27   | 3.82 | 5.71 | 2.4      | 1.75    | 2.65     | 8.19 |      |
|                                                                                                                                                                                                                   |                       | 2.98                   | 3.17                                                          | 2.62                                         | 4.1  | 4.15                              | 2.88                 | 2.6                 | 3.37        | 3.62            | 3.41       | 1.66              | 4.43         | 3.02       | 3.26                | -0.21                 | -0.27                | 2.88         | 0.63                 | 0.64        | 2.01                                        | 1.02   | 0.14   | 3.15 | 3.01 | 0.68     | 3.53    | 2.62     | 2.86 |      |
| TB-AML1_1_AML4<br>TB-AML1_1_AML5<br>TB-AML1_1_AML3                                                                                                                                                                | APL t(15;17)          | 5.99                   | 5.52                                                          | 3.44                                         | 5.78 | 4.09                              | 4.46                 | 4.51                | 5.73        | 5.43            | 4.65       | 1.08              | 7.74         | 7.25       | 7.01                | 0.1                   | -0.17                | 4.69         | 0.59                 | 4.12        | 4.33                                        | 1.16   | -0.01  | 3.12 | 4.4  | 0.68     | 6.06    | 3.13     | X    |      |
|                                                                                                                                                                                                                   |                       | 1.66                   | 2.59                                                          | 2.33                                         | 4.7  | 3.09                              | 2.64                 | 2.01                | 3.59        | 2.5             | 1.28       | 0.75              | 5.39         | 2.98       | 1.15                | -0.12                 | -0.13                | 0.35         | 0.44                 | 0.35        | 2.3                                         | 0.95   | 0.21   | 2.55 | 0.53 | 0.28     | 3.11    | 2.01     | 1.68 |      |
|                                                                                                                                                                                                                   |                       | 2.93                   | 4.17                                                          | 2.61                                         | 4.47 | 1.74                              | 1.55                 | 2.14                | 2.25        | 4.08            | 4.26       | 0.86              | 4.3          | 4.33       | 5.01                | 0.62                  | -0.05                | 2.01         | 0.45                 | 0.29        | 1.93                                        | 1.75   | 0      | 0    | 3.33 | 2.37     | 1       | 4.07     | 2.75 | 2.63 |
| TB-AML1_1_AML27<br>TB-AML1_1_AML20<br>TB-AML1_1_AML21<br>TB-AML1_1_AML2<br>TB-AML1_1_AML30<br>TB-AML1_1_AML39<br>TB-AML1_1_AML7<br>TB-AML1_1_AML9<br>TB-AML1_1_AML37<br>TB-AML1_1_AML38<br>TB-AML1_1_AML40        | FLT3-ITD+<br>NK-AML   | 2.29                   | 2.97                                                          | 2.5                                          | 3.2  | 2.29                              | 1.95                 | 2.25                | 2.77        | 4.09            | 2.18       | 1.99              | 2.16         | 2.73       | 1.19                | 0.33                  | 0.04                 | 1.95         | 0.7                  | 0.84        | 2.15                                        | 2.1    | 0.35   | 3.09 | 1.0  | 0.9      | 0.5     | 2.77     | 2.77 |      |
|                                                                                                                                                                                                                   |                       | 3.64                   | 3.83                                                          | 2.87                                         | 3.97 | 3.08                              | 2.66                 | 2.69                | 3.8         | 4.83            | 4.05       | 1.24              | 5            | 17.23      | 12.99               | 0.49                  | -0.1                 | 0.63         | 0.98                 | 0.98        | 0.58                                        | 0.99   | 0.65   | 3.48 | 7.28 | 0.89     | 3.59    | 2.38     | 0.02 |      |
|                                                                                                                                                                                                                   |                       | 3.36                   | 4.23                                                          | 3.65                                         | 4.35 | 2.77                              | 2.19                 | 2.81                | 3.25        | 5.01            | 3.07       | 2.47              | 3.12         | 5.22       | 3.88                | 0.86                  | 0.55                 | 1.47         | 0.4                  | 0.7         | 2.49                                        | 1.58   | 0.1    | 3.44 | 2.29 | 0.81     | 1.35    | 3        | 2.19 |      |
|                                                                                                                                                                                                                   |                       | 1.66                   | 3.97                                                          | 2.76                                         | 4.06 | 2.78                              | 2.71                 | 2.5                 | 3.2         | 3.81            | 2.39       | 0.81              | 3.11         | 14.31      | 6.66                | 0.24                  | -0.06                | 1.49         | 0.51                 | 1.01        | 2.85                                        | 1.35   | 0.74   | 2.9  | 2.06 | 0.25     | 0.58    | 2.36     | 0.36 |      |
|                                                                                                                                                                                                                   |                       | 2.7                    | 2.39                                                          | 1.62                                         | 2.52 | 1.04                              | 17.68                | 14.62               | 1.9         | 2.2             | 2.09       | 2.68              | 21.5         | 22.14      | 19.62               | 2.38                  | 0.3                  | 0.94         | 0.42                 | 0.42        | 3.19                                        | 0.98   | -0.1   | 2.71 | 1.5  | 0.58     | 3.14    | 2.15     | 1.24 |      |
|                                                                                                                                                                                                                   |                       | 2.34                   | 4.1                                                           | 2.67                                         | 5.21 | 2.74                              | 0.63                 | 0.77                | 1.25        | 3.22            | 3.08       | 2.36              | 1.79         | 1.31       | 0.84                | 0.19                  | 0.09                 | 1            | 1.2                  | 0.78        | 0.56                                        | 1.95   | -0.18  | 3.12 | 1.66 | 0.13     | 2.03    | 3        | X    |      |
|                                                                                                                                                                                                                   |                       | 1.46                   | 4.61                                                          | 3.76                                         | 4.82 | 3.9                               | 1.77                 | 1.78                | 3.57        | 4.42            | 2.01       | 1.88              | 0.75         | 1          | 0.57                | 0.4                   | 0.47                 | 2.34         | 1.26                 | 0.86        | 3.07                                        | 1.71   | 0.45   | 3.56 | 3.38 | 0.58     | 0.83    | 3.68     | 1.3  | 1.0  |
|                                                                                                                                                                                                                   |                       | 6.11                   | 8.35                                                          | 8.55                                         | 7.78 | 6.61                              | 5.8                  | 6.15                | 7.33        | 7.94            | 4.74       | 0.92              | 4.79         | 3.55       | 1.37                | 0.19                  | 0.21                 | 2.72         | 0.9                  | 2.59        | -0.09                                       | 1.51   | 0.48   | 3    | 6.01 | -0.03    | 3.31    | 4.92     | 3.31 | 1.0  |
|                                                                                                                                                                                                                   |                       | 1.96                   | 3.9                                                           | 2.59                                         | 3.98 | 4.22                              | 1.89                 | 0.99                | 2.64        | 4.19            | 3.03       | 1.8               | 1.29         | 4.77       | 1.25                | 0.84                  | 0.68                 | 0.67         | 1.06                 | 1.05        | 2.68                                        | 1.53   | 0.2    | 2.83 | 2.84 | 0.47     | 1.28    | 3.85     | 0.98 |      |
|                                                                                                                                                                                                                   |                       | 1.66                   | 3.42                                                          | 3.01                                         | 5.42 | 3.2                               | 0.85                 | 0.87                | 1.79        | 4.15            | 2.27       | 1.84              | 1.87         | 3.1        | 0.89                | 0.29                  | 0.37                 | 0.93         | 0.88                 | 0.64        | 1.39                                        | 1.3    | 0.18   | 2.99 | 0.85 | 0.15     | 0.46    | 2.29     | 1.61 |      |
| TB-AML1_1_AML31<br>TB-AML1_1_AML6<br>TB-AML1_1_AML8                                                                                                                                                               | FLT3-TKD+<br>NK-AML   | 3.33                   | 3.62                                                          | 3.05                                         | 3.8  | 2.81                              | 2.55                 | 3.11                | 3.31        | 4.33            | 2.71       | 3.44              | 2.86         | 3.75       | 3.57                | 0.21                  | -0.23                | 1.5          | 1.6                  | 0.82        | 4.35                                        | 1.34   | 0.28   | 3.01 | 2.34 | 1.34     | 1.76    | 2.42     | 1.28 |      |
|                                                                                                                                                                                                                   |                       | 3.81                   | 4.68                                                          | 4.45                                         | 6.04 | 5                                 | 4.46                 | 2.23                | 4.34        | 5.14            | 3.22       | 2.99              | 2.36         | 3.99       | 0.88                | 0.78                  | 0.53                 | 1.02         | 1.08                 | 0.77        | 4.83                                        | 2.12   | 0.68   | 3.78 | 1.98 | 1.34     | 1.71    | 3.9      | 0.87 |      |
|                                                                                                                                                                                                                   |                       | 1.11                   | 3.56                                                          | 3.34                                         | 4.6  | 2.31                              | 0.75                 | 0.42                | 1.19        | 2.72            | 2.02       | 2.18              | 0.85         | 0.42       | 0.09                | -0.16                 | -0.14                | 0.48         | 0.24                 | -0.24       | 1.47                                        | 2.6    | 0.04   | 3    | 1.17 | 0.27     | 1.19    | 2.97     | 1.4  |      |
| TB-AML1_1_AML13<br>TB-AML1_1_AML33<br>TB-AML1_1_AML40<br>TB-AML1_1_AML36<br>TB-AML1_1_AML14<br>TB-AML1_1_AML15                                                                                                    | FLT3wt<br>NK-AML      | 0.08                   | 5.01                                                          | 4.13                                         | 6.59 | 5.88                              | 3.73                 | 1.84                | 3.85        | 4.81            | 1.74       | 1.82              | 0.99         | 0.69       | 0.34                | -0.01                 | 0                    | 0.43         | 0.33                 | 0.59        | 2.1                                         | 1.79   | 0.52   | 3.43 | 5.25 | -0.03    | 4.41    | 2.77     | 1.2  |      |
|                                                                                                                                                                                                                   |                       | 0.35                   | 3.21                                                          | 2.98                                         | 3.43 | 2.17                              | 0.68                 | -0.02               | 2.9         | 4.77            | 0.86       | 0.52              | 0.74         | 0.47       | 0.26                | -0.2                  | -0.29                | 1.03         | 0.13                 | -0.12       | -0.09                                       | 0.62   | -0.2   | 2.8  | 1.46 | 0.62     | 0.28    | 1.75     | 1.71 |      |
|                                                                                                                                                                                                                   |                       | 0.45                   | 3.72                                                          | 2.92                                         | 5.51 | 2.53                              | 0.8                  | 0.59                | 2.66        | 4.43            | 2.64       | 2.11              | 0.64         | 0.43       | 0.1                 | -0.14                 | -0.2                 | 0.16         | 0.27                 | -0.1        | 0.76                                        | 0.72   | -0.11  | 2.04 | 1.62 | X        | 0.33    | 1.37     | 1    |      |
|                                                                                                                                                                                                                   |                       | 0.98                   | 3.43                                                          | 3.12                                         | 4.41 | 2.39                              | 1.09                 | 0.49                | 3.09        | 4.46            | 3.86       | 2.25              | 1.36         | 1.1        | 0.64                | -0.19                 | -0.21                | 0.33         | 0.26                 | 0.15        | 2.13                                        | 0.81   | 0      | 2.8  | 1.36 | 0.22     | 1.5     | 2.43     | 0.72 |      |
|                                                                                                                                                                                                                   |                       | 1.36                   | 2.93                                                          | 2.77                                         | 5.28 | 3.24                              | 0.82                 | 0.36                | 1.25        | 3.31            | 1.5        | 2.9               | 1.69         | 1.34       | 0.14                | -0.18                 | -0.13                | 0.74         | 0.54                 | 0.47        | 0.26                                        | 0.52   | 0.14   | 3.17 | 2.4  | 1.39     | 3.17    | 2.4      | 0.71 |      |
|                                                                                                                                                                                                                   |                       | 2.24                   | 2.79                                                          | 2.45                                         | 3.49 | 2.16                              | 1.38                 | 1.26                | 2.99        | 4.63            | 3.26       | 2.49              | 2.65         | 3.1        | 3.27                | -0.21                 | -0.23                | 1.79         | 1.05                 | 0.83        | 3.75                                        | 1.4    | 0.7    | 2.86 | 2.39 | 0.4      | 1.28    | 2.44     | 1.08 |      |
| TB-AML1_1_AML22<br>TB-AML1_1_AML18<br>TB-AML1_1_AML19<br>TB-AML1_1_AML29<br>TB-AML1_1_AML41<br>TB-AML1_1_AML4<br>TB-AML1_1_AML25                                                                                  | ADK-AML<br>Cmplx/Mono | 1.42                   | 0.79                                                          | 0.73                                         | 0.81 | 0.87                              | 0.82                 | 0.5                 | 1.59        | 5.33            | 3.48       | 1.46              | 2.86         | 3.3        | 1.17                | 0.12                  | -0.16                | 0.81         | 0.6                  | 0.69        | 1.72                                        | 1.5    | -0.02  | 2.64 | 0.75 | 1.07     | 0.36    | 1.91     | 1.66 |      |
|                                                                                                                                                                                                                   |                       | 5.78                   | 4.91                                                          | 3.63                                         | 5.63 | 6.27                              | 2.22                 | 0.88                | 6.44        | 8.04            | 5.96       | 1.54              | 3.83         | 5.35       | 2.94                | -0.1                  | -0.13                | 1.75         | 1.09                 | 0.9         | 0.69                                        | 1.92   | -0.02  | 4.69 | 4.64 | 1.47     | 1.78    | 2.6      | 1.46 |      |
|                                                                                                                                                                                                                   |                       | 2.42                   | 2.87                                                          | 1.93                                         | 3.47 | 1.78                              | 1.09                 | 1.44                | 1.71        | 4.24            | 2.32       | 1.2               | 1.41         | 0.57       | 0.9                 | 0.14                  | -0.11                | 1.13         | 0.68                 | 0.15        | 2.3                                         | 1.91   | 0.25   | 3.44 | 1.13 | 1.42     | 0.93    | 2.78     | 1.11 |      |
|                                                                                                                                                                                                                   |                       | 3.53                   | 3.61                                                          | 2.77                                         | 4.2  | 3.26                              | 2.29                 | 1.93                | 3.83        | 6.75            | 22.24      | 7.23              | 5.39         | 5.86       | 4.59                | 2.6                   | 0.17                 | 0.64         | 0.78                 | 1.38        | 2.14                                        | 1.55   | 0.44   | 3.2  | 1.87 | 0.97     | 3.99    | 2.49     | 1.55 |      |
|                                                                                                                                                                                                                   |                       | 0.89                   | 1.54                                                          | 1.23                                         | 3.22 | 1.29                              | 0.31                 | 0.79                | 0.48        | 1.31            | 1.23       | 1.01              | 0.45         | 0.64       | 0.59                | 0.36                  | 0.27                 | 0.34         | -0.1                 | -0.17       | 1.77                                        | 1.39   | 0.06   | 2.86 | 0.56 | 1.06     | -0.35   | 1.47     | 0.71 |      |
| TB-AML1_1_AML4<br>TB-AML1_1_AML2<br>TB-AML1_1_AML5<br>TB-AML1_1_AML6<br>TB-AML1_1_AML3<br>TB-AML1_1_AML4<br>TB-AML1_1_AML4<br>TB-AML1_1_AM5<br>TB-AML1_1_AML6<br>TB-AML1_1_AML3<br>TB-AML1_1_AM4<br>TB-AML1_1_AM5 | Healthy Donors        | 2.31                   | 3.34                                                          | 2.87                                         | 5.2  | 2.25                              | 0.79                 | 0.39                | 2.91        | 4.95            | 3.95       | 3.95              | 1.66         | 2.96       | 2.88                | 1.72                  | 0.15                 | 0.73         | 0.39                 | 0.32        | 1.31                                        | 1.48   | 0.19   | 4.06 | 3.22 | 1.65     | 2.53    | 3.31     | 1.4  |      |
|                                                                                                                                                                                                                   |                       | 0.68                   | 1.26                                                          | 1.41                                         | 0.65 | 0.92                              | 0.36                 | 0.28                | 1.2         | 1.7             | 1.2        | 0.74              | 0.46         | 0.33       | 0.08                | 0.13                  | 0.25                 | 0.43         | 0.16                 | 0.13        | 0.28                                        | 1.55   | 0.18   | 2.39 | 3.41 | -0.09    | 0.26    | 1.89     | 1.49 |      |
|                                                                                                                                                                                                                   |                       | -0.01                  | 1.95                                                          | 1.65                                         | 2.06 | 0.99                              | 0                    | -0.02               | 1           | 2.04            | 1.2        | 1.1               | 0.47         | 0.86       | 0.54                | -0.13                 | -0.2                 | 0.61         | 0.19                 | 0           | 0                                           | 0.31   | -0.03  | 1.24 | 1.83 | 0.54     | 0.65    | 1.11     | 0.86 |      |
|                                                                                                                                                                                                                   |                       | 0.09                   | 2.55                                                          | 1.94                                         | 3.83 | 1.35                              | 1.25                 | 0.81                | 1.85        | 3.48            | 2.18       | 1.1               | 0.96         | 3.01       | 1.24                | -0.02                 | -0.13                | 0.97         | 0.24                 | 0           | 0                                           | 0.64   | 0      | 2.06 | 2.15 | 0.84     | 0.69    | 2.2      | 1.39 |      |
|                                                                                                                                                                                                                   |                       | 0                      | 2.53                                                          | 1.93                                         | 3.39 | 1.68                              | 0.81                 | 0                   | 1.69        | 2.32            | 1.59       | 1.07              | 0.7          | 0.66       | 0.38                | -0.14                 | -0.14                | 0.73         | 0                    | -0.04       | 0.14                                        | 0.96   | 0      | 2.38 | 2.62 | 0.71     | 0.69    | 2.68     | 1.89 |      |
|                                                                                                                                                                                                                   |                       | 0                      | 1.65                                                          | 1.43                                         | 2.16 | 1.21                              | 0.67                 | 0.11                | 1.47        | 1.59            | 0.98       | 0.85              | 0.5          | 0.63       | 0.32                | -0.13                 | -0.17                | 0.73         | 0.1                  | -0.03       | 0                                           | 0.3    | -0.08  | 1.62 | 1.19 | 0.59     | 0.23    | 1.4      | 1.3  |      |
|                                                                                                                                                                                                                   |                       | -0.11                  | 1.59                                                          | 1.44                                         | 2.14 | 1.16                              | 0.59                 | 0.24                | 1.26        | 1.44            | 0.99       | 0.73              | 0.39         | 0.53       | 0.22                | -0.21                 | -0.25                | 0.53         | 0.15                 | -0.11       | -0.02                                       | 0.37   | -0.2   | 1.58 | 1.01 | 0.29     | 0.24    | 1.41     | 0.74 |      |
|                                                                                                                                                                                                                   |                       | 0.13                   | 2.26                                                          | 2.09                                         | 2.61 | 1.52                              | 1.31                 | 1.05                | 1.92        | 3.2             | 1.97       | 1.11              | 0.82         | 3.31       | 0.99                | -0.13                 | -0.21                | 0.83         | 0.26                 | 0           | -0.07                                       | 0.7    | -0.13  | 2.07 | 1.85 | 0.88     | 0.5     | 2.16     | 0.96 |      |
|                                                                                                                                                                                                                   |                       | 0                      | 2.09                                                          | 1.78                                         | 2.37 | 1.43                              | 0.63                 | 0.33                | 1.1         | 1.68            | 1.2        | 0.98              | 0.57         | 0.79       | 0.38                | -0.15                 | -0.18                | 0.77         | 0.31                 | -0.07       | 0.14                                        | 0.9    | -0.09  | 2.33 | 1.76 | 0.53     | 0.74    | 1.67     | 1.25 |      |
|                                                                                                                                                                                                                   |                       | -0.03                  | 1.77                                                          | 1.64                                         | 2.25 | 1.25                              | 0.51                 | 0.09                | 1.6         | 1.84            | 1.4        | 1.23              | 0.67         | 0.64       | 0.17                | -0.19                 | -0.21                | 0.81         | 0.19                 | -0.16       | -0.01                                       | 0.51   | -0.18  | 1.94 | 1.52 | 0.5      | 0.43    | 1.91     | 1.33 |      |
| 0.2                                                                                                                                                                                                               | 2.05                  | 1.76                   | 2.69                                                          | 1.67                                         | 0.8  | -0.02                             | 1.26                 | 2.02                | 1.54        | 1.37            | 0.74       | 0.94              | 0.35         | -0.11      | -0.14               | 0.98                  | 0.37                 | -0.          |                      |             |                                             |        |        |      |      |          |         |          |      |      |



**p4EBP1 Median**

|                    | CD34+CD38 <sup>low</sup> | HSC/MPP-<br>CD133negCD34 <sup>low</sup> CD38 <sup>low</sup> | CMP-<br>CD34+CD38 <sup>low</sup> | GMP  | 34negCD38 <sup>low</sup> Undiff | 34neg38negUndiff | Myelo/Mono blast | ProMonocyte | CD14neg Mono | CD14+ Mono | 11b+DRneg Mono | ProMyelocyte | Myelocytes | Meta-myelocytes | Mature Granulocyte | Pro-erythroblast | Erythroblast | Late Erythroblast | Pre-B Cells | Mature B cells CD20+CD19+ | Plasma | T Cell | pDC  | mDC  | Basophil | NK Cell | Platelet |         |      |      |
|--------------------|--------------------------|-------------------------------------------------------------|----------------------------------|------|---------------------------------|------------------|------------------|-------------|--------------|------------|----------------|--------------|------------|-----------------|--------------------|------------------|--------------|-------------------|-------------|---------------------------|--------|--------|------|------|----------|---------|----------|---------|------|------|
|                    |                          |                                                             |                                  |      |                                 |                  |                  |             |              |            |                |              |            |                 |                    |                  |              |                   |             |                           |        |        |      |      |          |         |          | Ungated | 0.65 | 0.62 |
| CBF-AML t(8;21)    | 3.31                     | 3.68                                                        | 3.48                             | 4.14 | 3.11                            | 5.39             | 10.37            | 4.42        | 5.9          | 1.86       | 3.09           | 1.36         | 3.51       | 2.6             | 1.4                | 1.54             | 1.78         | 0.33              | 0.46        | 1.64                      | 0.67   | -0.05  | 0.64 | 2.45 | 3.67     | 0.55    | 0.46     | -0.66   |      |      |
| CBF-AML inv(16)    | 0.75                     | 0.5                                                         | 0.42                             | 0.79 | 0.61                            | 0.98             | 0.69             | 1.47        | 3.06         | 6.62       | 5.72           | 4.07         | 6.39       | 6.32            | 3.05               | 1.12             | 49.45        | 0.97              | 0.65        | 2.31                      | 0.91   | 0      | 1.05 | 3.1  | 2        | 1.97    | 0.54     | 0.72    |      |      |
| APL t(15;17)       | 6.41                     | 2.43                                                        | 2.16                             | 2.47 | 2.93                            | 11.3             | 10.15            | 6.05        | 1.39         | 1.35       | 4.84           | 8.03         | 6.99       | 8.12            | 2.66               | 1.53             | 16.57        | 0.72              | 8.89        | 4.42                      | 0.48   | -0.25  | 0.65 | 0.55 | 3.75     | 3.3     | 0.55     | X       |      |      |
| FLT3-ITD+ NK-AML   | 8.15                     | 3.41                                                        | 2.4                              | 3.65 | 3.3                             | 6.54             | 5.86             | 8.99        | 7.76         | 3.29       | 2.65           | 12.37        | 10.58      | 10.83           | 3.37               | 1.44             | 9.7          | 0.8               | 0.52        | 7.94                      | 1.56   | 0.18   | 0.97 | 2.32 | 5.89     | 10.31   | 0.98     | 1.65    |      |      |
| FLT3wt NK-AML      | 1.08                     | 1.77                                                        | 1.95                             | 6.47 | 4.35                            | 4.74             | 0.95             | 9.86        | 13.96        | 10.27      | 12.08          | 10.02        | 9.51       | 5.54            | 5.06               | 2.5              | 3.08         | 3.45              | 27.93       | 1.19                      | 0.27   | 1.37   | 0.94 | 0.21 | 0.91     | 4.67    | 15.88    | 2.43    | 0.54 | 2.57 |
| MLL t(10;11)       | 1.76                     | 0.75                                                        | 0.77                             | 0.74 | 0.99                            | 1.59             | 1.09             | 2.13        | 9.11         | 7.32       | 7.85           | 7.11         | 7.3        | 7.57            | 4.01               | 1.79             | 39.69        | 0.82              | 0           | 1.92                      | 1.17   | -0.06  | 0.75 | 0.93 | 6.94     | 1.62    | 0.28     | 0.1     |      |      |
| ADK-AML Cmplx/Mono | 1.17                     | 1.14                                                        | 0.79                             | 2.62 | 1.69                            | 0.54             | 0.21             | 1.31        | 1.89         | 1.95       | 2.28           | 1.8          | 5          | 2.35            | 1.51               | 1.86             | 7.34         | 0.83              | -0.11       | 1.95                      | 1.11   | -0.01  | 0.56 | 3.27 | 1.54     | 2.36    | 0.18     | 0.43    |      |      |
| Healthy Donors     | 3.76                     | 12.22                                                       | 12.01                            | 13.6 | 10.94                           | 3.47             | 6.1              | 14.35       | 17.98        | 14.97      | 11.44          | 8.96         | 12.53      | 9.33            | 3.35               | 2.17             | 40.04        | 3.35              | 1           | 1.95                      | 1.22   | -0.04  | 0.71 | 4.03 | 8.81     | 2.72    | 0.87     | 0.11    |      |      |
| CR / CR1           | 1.05                     | 3.49                                                        | 3.43                             | 4.57 | 2.97                            | 0.66             | 0.46             | 5.6         | 8.77         | 5.85       | 5.45           | 2.97         | 4.16       | 4.18            | 1.57               | 0.94             | 11.09        | 0.97              | 0.17        | 0.84                      | 0.65   | -0.07  | 0.93 | 1.6  | 1.87     | 1.2     | 0.46     | 0.03    |      |      |
| CR / CR2           | 0.35                     | 4.92                                                        | 5.46                             | 5.51 | 16.23                           | 40.19            | -0.04            | 5.14        | 8.07         | 6.11       | 4.39           | 2.49         | 0.59       | 0.67            | -0.04              | 0.76             | 1.37         | 0.5               | -0.07       | 0.93                      | 0.75   | -0.23  | 0.63 | 1.51 | 2.89     | 1.82    | -0.02    | -0.32   |      |      |

pSMAD1/5 Median

Table with columns for various cell types and markers (e.g., CD34+CD38low, HSC/MPP, CMP, GMP, Myelo/Mono blast, ProMonocyte, CD14neg Mono, CD14+ Mono, 11b+DRneg Mono, ProMyelocyte, Myelocytes, Meta-myelocytes, Mature Granulocyte, Pro-erythroblast, Erythroblast, Late Erythroblast, Pre-B Cells, Mature B cells CD19+CD19+, Plasma, T Cell, pDC, mDC, Basophil, NK Cell, Platelet) and rows for various AML samples (e.g., TB-AML1\_AML26, TB-AML3\_AML35, TB-AML3\_AML5, TB-AML1\_AML10, TB-AML2\_AML32, TB-AML2\_AML4, TB-AML3\_AML5, TB-AML3\_AML3, TB-AML1\_AML27, TB-AML2\_AML20, TB-AML2\_AML21, TB-AML2\_AML23, TB-AML2\_AML30, TB-AML2\_AML39, TB-AML3\_AML7, TB-AML3\_AML9, TB-AML4\_AML37, TB-AML4\_AML38, TB-AML4\_AML40, TB-AML2\_AML31, TB-AML3\_TKD+, TB-AML4\_AML8, TB-AML1\_AML13, TB-AML2\_AML33, TB-AML2\_AML40, TB-AML3\_AML36, TB-AML4\_AML14, TB-AML4\_AML15, TB-AML2\_AML22, TB-AML1\_AML18, TB-AML2\_AML19, TB-AML2\_AML29, TB-AML2\_AML41, TB-AML2\_AML4, TB-AML4\_AML25, TB-AML1\_NI-1, TB-AML1\_NI-3, TB-AML1\_NI-5, TB-AML1\_NI-6, TB-AML2\_NI-3, TB-AML2\_NI-4, TB-AML3\_NI-6, TB-AML3\_NI-4, TB-AML3\_NI-5, TB-AML4\_NI-6, TB-AML4\_NI-3, TB-AML4\_NI-4, TB-AML4\_NI-5, TB-AML1\_CR6, TB-AML3\_CR3, TB-AML4\_CR5, TB-AML4\_CR7, TB-AML4\_CR2).



**pCREB Median**

|                    | CD34+CD38 <sup>low</sup> | HSC/MPP-<br>CD33negCD34 <sup>low</sup> CD38 <sup>int</sup> | OMP-<br>CD34+CD38 <sup>int</sup> cwCD33 <sup>mid</sup> | GMP  | 34negCD38 <sup>int</sup> +Undiff | 34neg38negUndiff | Myelo/Mono blast | ProMonocyte | CD14neg Mono | CD14+ Mono | 11b+DRneg Mono | ProMyelocyte | Myelocytes | Meta-myelocytes | Mature Granulocyte | Pro-erythroblast | Erythroblast | Late Erythroblast | Pre-B Cells | Mature B cells CD20+CD19+ | Plasma | T Cell | pDC   | mDC   | Basophil | NK Cell | Platelet |       |
|--------------------|--------------------------|------------------------------------------------------------|--------------------------------------------------------|------|----------------------------------|------------------|------------------|-------------|--------------|------------|----------------|--------------|------------|-----------------|--------------------|------------------|--------------|-------------------|-------------|---------------------------|--------|--------|-------|-------|----------|---------|----------|-------|
| TB-AML1_AML26      | 0.85                     | 0.39                                                       | 0.24                                                   | 0.87 | 0.44                             | 1.7              | 0.8              | 1.3         | 2.61         | 2.16       | 1.11           | 2.3          | 0.61       | 1.00            | 0.8                | 0.9              | 0.48         | 0.14              | 2.51        | 0.85                      | 0.84   | 1.41   | 2.51  | 2.48  | 5.32     | 0.95    | 2.48     | 4.71  |
| TB-AML3_AML35      | 3.57                     | 2.67                                                       | 2.48                                                   | 3.74 | 2.77                             | 7.6              | 8.77             | 5.57        | 9.57         | 7.46       | 7.4            | 5.91         | 3.6        | 2.82            | 1.87               | 2.11             | 0.94         | 1.76              | 1.21        | 5.46                      | 1.67   | 1.86   | 4.92  | 8.25  | 8.15     | 7.05    | 4.24     | 0.46  |
| TB-AML3_AML5       | 5.76                     | 1.33                                                       | 1.15                                                   | 2.12 | 1.67                             | 11.45            | 6.88             | 5.96        | 8.1          | 12.84      | 12.91          | 14.69        | 5.25       | 10.38           | 11.71              | 8.85             | 6.03         | 1.34              | 0.54        | 3.77                      | 4.9    | 1.63   | 5.33  | 4.03  | 20.57    | 8.76    | 4.04     | 0.46  |
| CBF-AML inv(16)    | 4.52                     | 2.68                                                       | 2.09                                                   | 3.2  | 3.63                             | 8.57             | 5.66             | 5.48        | 5.38         | 4.2        | 4.98           | 7.05         | 8.25       | 8.39            | 8.72               | 8.35             | 4.13         | 1.93              | 3.02        | 6.75                      | 4.01   | 1.04   | 5.58  | 3.94  | 4.68     | 10.16   | 3.91     | 0.25  |
| AML t(15;17)       | 4.96                     | 2.26                                                       | 1.79                                                   | 2.33 | 2.21                             | 5.19             | 4.85             | 4.76        | 2.18         | 2.44       | 8.47           | 6.06         | 5.7        | 6.68            | 6.64               | 5.34             | 6.9          | 2.64              | 5.3         | 4.79                      | 2.89   | 1.19   | 4.35  | 0.28  | 12.11    | 3.27    | 2.71     | X     |
| AML t(8;21)        | 3.54                     | 2.56                                                       | 2.7                                                    | 2.5  | 2.45                             | 3.71             | 2.74             | 4.17        | 4.07         | 4.75       | 4.03           | 5.78         | 5.31       | 6.06            | 4.55               | 3.32             | 2.15         | 1.44              | 1.01        | 1.92                      | 1.42   | 0.4    | 1.97  | 2.09  | 6.42     | 3.53    | 2.3      | 0.76  |
| FLT3-ITD+ NK-AML   | 12.01                    | 5.37                                                       | 4.18                                                   | 5.59 | 5.45                             | 10.71            | 7.47             | 14.29       | 12.27        | 5.72       | 8.81           | 23.17        | 21.71      | 17.45           | 8.95               | 4.21             | 12.53        | 1.44              | 1.54        | 15.12                     | 3.92   | 2.9    | 8.08  | 3.32  | 10.61    | 16.87   | 6.75     | 1.93  |
| FLT3-ITD+ NK-AML   | 5.58                     | 6.15                                                       | 4.49                                                   | 7.75 | 3.05                             | 3.97             | 6.73             | 6.66        | 9.58         | 27.76      | 30.91          | 39.34        | 24.29      | 18.56           | 16.58              | 10.1             | 7.96         | 2.09              | 1.97        | 7.52                      | 4.01   | 1.38   | 9.29  | 3.04  | 32.13    | 16.21   | 6.48     | 0.39  |
| FLT3-ITD+ NK-AML   | 3.66                     | 2.16                                                       | 1.43                                                   | 2.27 | 2.77                             | 4.86             | 3.82             | 4.38        | 4.77         | 14.92      | 20.2           | 5.8          | 23.09      | 13.75           | 5.41               | 4.77             | 15.75        | 2.11              | 1.56        | 2.92                      | 2.09   | 1.16   | 8.3   | 2.88  | 29.13    | 8.96    | 9.8      | 2.75  |
| FLT3-ITD+ NK-AML   | 3.53                     | 0.96                                                       | 0.7                                                    | 1.03 | 1.97                             | 3.25             | 2.85             | 4.69        | 5.59         | 9.97       | 11.14          | 7.7          | 4.13       | 5.33            | 3.64               | 2.96             | 6.09         | 2.38              | 1.84        | 3.42                      | 2.77   | 1.75   | 6.42  | 1.37  | 16.64    | 5.98    | 6.8      | 0.05  |
| FLT3-ITD+ NK-AML   | 15.84                    | 3.83                                                       | 4.01                                                   | 3.85 | 4.08                             | 10.41            | 6.66             | 9.85        | 8.13         | 25.34      | 25.1           | 18.22        | 17.07      | 21.16           | 13.98              | 11.28            | 32.86        | 4.45              | 1.94        | 16.72                     | 3.99   | 2.04   | 8.01  | 3.63  | 13.76    | 32.24   | 4.56     | 0.41  |
| FLT3-ITD+ NK-AML   | 6.94                     | 1.41                                                       | 2.79                                                   | 1.37 | 0.78                             | 8.39             | 8.37             | 3.54        | 3.59         | 4.98       | 7.95           | 13.51        | 10.23      | 12.37           | 10.75              | 7.72             | 8.87         | 2.69              | 1.34        | 7.21                      | 2.27   | 1.14   | 4.04  | 2.81  | 6.75     | 12.12   | 3.1      | 0.46  |
| FLT3-ITD+ NK-AML   | 17.91                    | 6.72                                                       | 20.9                                                   | 4.79 | 16.99                            | 5.61             | 4.4              | 8.14        | 16.01        | 24.02      | 25.52          | 14.18        | 6.33       | 5.47            | 6.26               | 6.74             | 9.4          | 1.28              | 0.33        | 5.56                      | 6.58   | 0.34   | 7.22  | 6.3   | 11.29    | 10.6    | 5.33     | X     |
| FLT3-ITD+ NK-AML   | 4.64                     | 2.41                                                       | 1.95                                                   | 2.52 | 3.08                             | 3.75             | 2.64             | 4.22        | 5.78         | 21.3       | 22.08          | 4.09         | 3.11       | 4.27            | 5.73               | 6.5              | 7.35         | 1.77              | 0.69        | 4.52                      | 2.79   | 1.58   | 5.85  | 0.74  | 18.58    | 19.06   | 5.85     | 0.32  |
| FLT3-ITD+ NK-AML   | 1.57                     | 0.71                                                       | 0.62                                                   | 0.8  | 0.95                             | 2.09             | 1.77             | 1.03        | 0.65         | 1.1        | 5.37           | 3.19         | 3.19       | 4.13            | 5.94               | 3.7              | 18.01        | 2.6               | 8.56        | 3.55                      | 3.92   | 2.7    | 3.65  | 0.8   | 2.47     | 4.62    | 1.63     | 0.51  |
| FLT3-ITD+ NK-AML   | 6.82                     | 5.51                                                       | 4                                                      | 5.54 | 7.96                             | 3.2              | 4.21             | 10.59       | 8.93         | 17.44      | 24.64          | 17.02        | 24.57      | 15.79           | 16.5               | 15.1             | 17.5         | 2.69              | 0.67        | 5.3                       | 4.86   | 2.98   | 9.21  | 4.07  | 27.69    | 27.94   | 6.67     | 2.77  |
| FLT3-ITD+ NK-AML   | 4.92                     | 2.21                                                       | 1.94                                                   | 3.04 | 3.89                             | 6.32             | 1.37             | 9.98        | 11.13        | 13.83      | 13.4           | 14.04        | 9.64       | 7.1             | 6.93               | 7.87             | 25.51        | 1.68              | 0.9         | 5.36                      | 1.55   | 1.45   | 3.54  | 5.43  | 10.94    | 11.83   | 3.43     | 0.41  |
| FLT3-TKD+ NK-AML   | 5.92                     | 3.09                                                       | 2.31                                                   | 3.5  | 3.51                             | 5.27             | 4.23             | 6.32        | 6.2          | 14.18      | 22.3           | 23.57        | 6.27       | 7.62            | 8.24               | 4.43             | 27.89        | 7.62              | 12.1        | 9.61                      | 3.94   | 3      | 9.11  | 1.27  | 15.22    | 38.2    | 5.94     | 0.65  |
| FLT3-TKD+ NK-AML   | 12.11                    | 3.21                                                       | 3.3                                                    | 3.64 | 14.51                            | 14.6             | 4.54             | 14.25       | 12.89        | 14.06      | 9.75           | 9.34         | 12.65      | 6.92            | 8.03               | 6.57             | 2.19         | 3.39              | 2.27        | 7.06                      | 2.4    | 1.05   | 2.6   | 1.49  | 7.5      | 4.05    | 4.21     | 0.49  |
| FLT3-TKD+ NK-AML   | 2.11                     | 3.65                                                       | 2.99                                                   | 4.56 | 3.07                             | 1.79             | -0.15            | 3.04        | 7.45         | 8.74       | 9              | 4.75         | 1.81       | 2.38            | 3.01               | 3.35             | 2.77         | 0.95              | -0.15       | 0.68                      | 3.7    | 1.73   | 1.92  | 2.67  | 6.3      | 8.2     | 4.91     | 0.6   |
| FLT3wt NK-AML      | 2.83                     | 1.93                                                       | 1.37                                                   | 3.4  | 1.99                             | 3.48             | 1.41             | 3.99        | 5.53         | 4.27       | 4.83           | 3.5          | 2          | 2.93            | 3.88               | 5.15             | 2.26         | 1.72              | 0.84        | 2.28                      | 1.89   | 0.84   | 2.21  | 3.19  | 3.1      | 5.85    | 2.72     | 0     |
| FLT3wt NK-AML      | 2.79                     | 3.61                                                       | 3.11                                                   | 4.9  | 3.55                             | 3.59             | 1.49             | 6.37        | 8.83         | 9.5        | 8.04           | 6.26         | 3.22       | 3.27            | 2.67               | 2.2              | 3.43         | 1.85              | 0.99        | 0.93                      | 1.38   | 1.7    | 2.65  | 3.02  | 9.32     | 5.98    | 1.83     | 0.12  |
| FLT3wt NK-AML      | 3.86                     | 5.56                                                       | 5.49                                                   | 5.78 | 5.46                             | 4.8              | 2.42             | 14.39       | 17.57        | 15.1       | 14.83          | 7.69         | 4.61       | 6.25            | 3.96               | 3.43             | 5.57         | 3.42              | 0.59        | 5.31                      | 1.83   | 0.77   | 2.61  | 2.07  | X        | 9.45    | 3.31     | 0.32  |
| FLT3wt NK-AML      | 2.11                     | 1.6                                                        | 1.45                                                   | 4.01 | 4.47                             | 4.03             | 1.1              | 7.53        | 7.46         | 5.61       | 8.4            | 4.26         | 1.64       | 1.84            | 1.47               | 2.1              | 1.93         | 1.3               | 0.44        | 4.44                      | 1.62   | 0.83   | 3.12  | 7.25  | 5.76     | 6.63    | 2.69     | 0.63  |
| FLT3wt NK-AML      | 2.37                     | 1.5                                                        | 1.41                                                   | 3.17 | 1.91                             | 3.02             | 1.36             | 3.32        | 4.58         | 5.39       | 5.32           | 4.15         | 3.86       | 4.18            | 4.47               | 7.02             | 3.15         | 1.56              | 0.43        | 1.16                      | 1.27   | 0.7    | 1.82  | 3.65  | 7.34     | 4.86    | 1.97     | 1.99  |
| FLT3wt NK-AML      | 2.29                     | 1.65                                                       | 1.34                                                   | 2.4  | 1.76                             | 3.84             | 3.9              | 3.23        | 3.05         | 2.19       | 6.82           | 5.28         | 3.98       | 4.01            | 1.2                | 1.07             | 5.88         | 1.91              | -0.02       | 1.61                      | 1.81   | 1.01   | 2.09  | 10.57 | 5.54     | 9.46    | 2.41     | 0.57  |
| MLL t(10;11)       | 3.29                     | 1.5                                                        | 1.33                                                   | 1.54 | 1.85                             | 2.5              | 2.09             | 3.53        | 13.09        | 17.46      | 21.94          | 4.5          | 4.58       | 4.38            | 4.7                | 3.21             | 4.71         | 1.71              | 0.47        | 4.53                      | 1.83   | 1.37   | 3.52  | 5.98  | 21.16    | 9.65    | 4.38     | 0.61  |
| ADK-AML Cmplx/Mono | 2.16                     | 1.37                                                       | 0.89                                                   | 1.6  | 1.12                             | 5.55             | 1.11             | 1.81        | 2.35         | 5.53       | 7.89           | 9.43         | 2.93       | 3.93            | 3.3                | 2.73             | 14.33        | 2.19              | 0.52        | 3.41                      | 4.29   | 2.01   | 8.67  | 1.68  | 19.44    | 10.74   | 10.63    | 0     |
| ADK-AML Cmplx/Mono | 5.96                     | 5.34                                                       | 4.08                                                   | 6.4  | 5.86                             | 9.48             | 7.86             | 9.02        | 7.47         | 13.57      | 14.09          | 16.91        | 6.4        | 6.17            | 5.31               | 3.84             | 11.06        | 2.28              | 0.08        | 10.06                     | 3.02   | 1.08   | 10.58 | 15.25 | 32.77    | 23.33   | 13.54    | 0.91  |
| ADK-AML Cmplx/Mono | 2.39                     | 1.93                                                       | 1.41                                                   | 2.3  | 1.12                             | 0.99             | 2.58             | 2.92        | 5.84         | 33.9       | 20.78          | 5.41         | 3.76       | 5.04            | 6.61               | 3.65             | 8.38         | 1.9               | 1.39        | 2.97                      | 2.92   | 1.08   | 3.84  | 3.83  | 38.29    | 5.22    | 3.9      | 0.9   |
| ADK-AML Cmplx/Mono | 6.91                     | 6.07                                                       | 5.15                                                   | 9.65 | 7.02                             | 4.14             | 3.64             | 8.16        | 14.28        | 14.78      | 13.61          | 7.79         | 2.76       | 4.23            | 4.87               | 4.78             | 12.64        | 2.31              | 0.88        | 2.64                      | 3.32   | 1.73   | 8.09  | 8.94  | 10.69    | 1.25    | 6.65     | 1.19  |
| ADK-AML Cmplx/Mono | 5.5                      | 4.59                                                       | 3.9                                                    | 7.27 | 5.18                             | 3.18             | 0.64             | 10.67       | 15.3         | 20.82      | 21.84          | 11.75        | 4.82       | 5.69            | 7.99               | 5.63             | 8.37         | 3.28              | 1.48        | 2.67                      | 2.96   | 2.62   | 5.74  | 4.55  | 15.66    | 10.21   | 6.04     | 0.95  |
| ADK-AML Cmplx/Mono | 2.52                     | 2.74                                                       | 2.64                                                   | 2.87 | 3.57                             | 2.46             | 0.66             | 4.3         | 5.6          | 5.2        | 3.9            | 2.93         | 1.32       | 1.18            | 1.82               | 2.38             | 3.21         | 0.54              | 0.3         | 5.62                      | 1.83   | 0.93   | 3.77  | 6.37  | 2.49     | 6.52    | 5.54     | 0.22  |
| Healthy Donors     | 1.93                     | 3.59                                                       | 3.36                                                   | 3.45 | 1.56                             | 0.57             | 0.2              | 2.94        | 6.04         | 6.54       | 7.12           | 3.68         | 0.98       | 1.68            | 2.11               | 1.76             | 2.6          | 0.84              | 0.53        | 0.93                      | 1.31   | 0.68   | 2.27  | 2.14  | 6.92     | 4.11    | 3.28     | -0.07 |
| Healthy Donors     | 2.79                     | 3.61                                                       | 3.11                                                   | 4.9  | 3.55                             | 3.59             | 1.49             | 6.37        | 8.83         | 9.5        | 8.04           | 6.26         | 3.22       | 3.27            | 2.67               | 2.2              | 3.43         | 1.85              | 0.99        | 0.93                      | 1.38   | 1.7    | 2.65  | 3.02  | 9.32     | 5.98    | 1.83     | 0.12  |
| Healthy Donors     | 2.4                      | 3.52                                                       | 3.13                                                   | 5.22 | 3.3                              | 2.53             | 1.24             | 5.69        | 8.75         | 10.44      | 8.5            | 7.05         | 2.44       | 2.84            | 2.2                | 2                | 2.88         | 1.57              | 0.85        | 0.9                       | 1.84   | 1.86   | 2.57  | 3.2   | 11.75    | 6.92    | 2.86     | 0.18  |
| Healthy Donors     | 2.61                     | 6.53                                                       | 6.57                                                   | 6.85 | 4.29                             | 2.68             | 1.8              | 6.7         | 9.14         | 10.15      | 8.12           | 5.88         | 2.79       | 3.48            | 2.95               | 1.87             | 3.88         | 1.7               | 0.84        | 0.9                       | 1.53   | 0.98   | 3.17  | 3.01  | 6.65     | 5.45    | 3.27     | 0     |
| Healthy Donors     | 2.66                     | 7.26                                                       | 6.82                                                   | 8.11 | 4.4                              | 2.67             | 2.4              | 7.92        | 10.02        | 11.09      | 9.02           | 7.41         | 2.97       | 3.46            | 2.89               | 1.84             | 4.09         | 1.79              | 0.89        | 0.81                      | 1.44   | 0.87   | 3.33  | 3.6   | 8.79     | 5.14    | 3.22     | -0.03 |
| Healthy Donors     | 2.79                     | 3.52                                                       | 3.83                                                   | 4.68 | 3.83                             | 3.95             | 2.3              | 7.26        | 9.54         | 9.82       | 8.56           | 6.82         | 3.83       | 3.41            | 2.59               | 2.13             | 3.5          | 2.03              | 1.13        | 0.76                      | 1.28   | 1.34   | 2.64  | 3.18  | 11.43    | 6.31    | 3.61     | 0.22  |
| Healthy Donors     | 3.16                     | 4.59                                                       | 4.34                                                   | 4.66 | 3.82                             | 3.07             | 2.16             | 4.99        | 7.89         | 9.15       | 8.29           | 7.37         | 3.52       | 3.34            | 3.11               | 2.73             | 3.4          | 2.33              | 1.16        | 1.19                      | 1.42   | 0.89   |       |       |          |         |          |       |

pSTAT5 Median

Table with columns for various cell markers (CD34-CD38, HSC/MPP, CMP, GMP, 34negCD38, 34neg38neg, Myelo/Mono, ProMonocyte, CD14neg Mono, CD14+ Mono, 11b+DRneg Mono, ProMyelocyte, Myelocytes, Meta-myelocytes, Mature Granulocyte, Pro-erythroblast, Erythroblast, Late Erythroblast, Pre-B Cells, Mature B cells, Plasma, T Cell, pDC, mDC, Basophil, NK Cell, Platelet) and rows for various AML samples (e.g., TB-AML1\_AML26, CBF-AML t(8;21), TB-AML1\_AML10, APL t(15;17), TB-AML1\_AML27, TB-AML1\_AML20, TB-AML1\_AML30, FLT3-ITD+, NK-AML, FLT3-TKD+, NK-AML, FLT3wt NK-AML, MLL t(10;11), ADK-AML Cmplx/Mono, Healthy Donors, CR / CR1).

% Ki-67+ (based on IdU vs. Ki-67 biaxial gate for progenitor cells)

|               | Ungated | HSC -         |                            | MPP -       |               | CMP-  | GMP   | Myelo/Mon | ProMonocyte | CD14neg | CD14+ | ProMyelocyte | Myelocytes | Meta- myelocytes | Mature Granulocyte | Pro- erythroblast | Erythroblast | Late Erythroblast | Pre-B Cells | Mature B cells CD20+CD19+ | Plasma | T Cell | NK Cell |
|---------------|---------|---------------|----------------------------|-------------|---------------|-------|-------|-----------|-------------|---------|-------|--------------|------------|------------------|--------------------|-------------------|--------------|-------------------|-------------|---------------------------|--------|--------|---------|
|               |         | CD34+CD38l ow | CD39HCD33 negCD34+CD38l ow | CD39LowCD33 | CD34+CD38l ow |       |       |           |             |         |       |              |            |                  |                    |                   |              |                   |             |                           |        |        |         |
| TA-AML1_AML26 | 88.35   | 68.53         | 70.1                       | 61.77       | 78.57         | 66.28 | 78.14 | 93.45     | 95.6        | 95.06   | 91.49 | 93.53        | 95.19      | 94.19            | 100                | 99.93             | 99.61        | 94.44             | 62.6        | 98.67                     | 91.78  | 96.92  |         |
| TA-AML3_AML35 | 74.66   | 74.49         | 76.07                      | 74.31       | 73.09         | 70.17 | 70.94 | 77.16     | 79.65       | 86.54   | 85.23 | 64.83        | 63.38      | 61.25            | 85.19              | 100               | 98.02        | 97.14             | 19.32       | 91.81                     | 61.13  | 81.22  |         |
| TA-AML3_AML5  | 41.52   | 25.39         | 27.46                      | 25.27       | 23.49         | 46.56 | 58.59 | 56.45     | 53.97       | 41.33   | 63.54 | 86.63        | 47.92      | 17.84            | 83.33              | 87.36             | 52.94        | 82.28             | 1.84        | 59.46                     | 11.69  | 20.28  |         |
| TA-AML1_AML10 | 44.31   | 60.27         | 49.71                      | 47.01       | 67.26         | 29.43 | 54.11 | 62.52     | 78.45       | 37      | 49.02 | 55.49        | 37.14      | 6.24             | 97.14              | 90.06             | 50           | 50                | 1.69        | 24.97                     | 3.87   | 8.82   |         |
| TA-AML2_AML32 | 63.72   | 78.46         | 78.99                      | 78.76       | 77.85         | 75.01 | 71.98 | 65.21     | 56.71       | 38.68   | 59.38 | 56.36        | 29.92      | 7.6              | 98.68              | 76.66             | 19.4         | 66.67             | 2.24        | 53.3                      | 10.61  | 22.16  |         |
| TA-AML2_ AP14 | 46.92   | 9.82          | 2.78                       | 10.03       | 13.55         | 43.73 | 48.69 | 22.26     | 18.99       | 31.76   | 45.95 | 45.76        | 6.89       | 2.16             | 100                | 93.6              | 90.91        | 63                | 1.56        | 74.57                     | 5.8    | 24.85  |         |
| TA-AML3_ AP15 | 23.18   | 22.49         | 5.26                       | 8.38        | 22.91         | 11.21 | 25.26 | 7.42      | 8.07        | 10      | 19    | 21.8         | 4.03       | 0.28             | 68.18              | 86.62             | 29.89        | 23.08             | 0.46        | 45.45                     | 1.84   | 11.33  |         |
| TA-AML3_ AP13 | 34.48   | 24.06         | 0                          | 19.16       | 38.58         | 73.65 | 56.24 | 85.65     | 68.39       | 35.23   | 45.67 | 49.18        | 6.37       | 0.83             | 100                | 93.84             | 80.14        | 77.59             | 2.03        | 85.39                     | 12.15  | 30.9   |         |
| TA-AML1_AML27 | 15.68   | 2.91          | 0.52                       | 1.39        | 3.01          | 4.55  | 18.22 | 4.24      | 2.67        | 0       | 7.22  | 17.39        | 7.93       | 0.33             | 80                 | 85.77             | 35           | 16.67             | 0.28        | 12.28                     | 2.7    | 7.71   |         |
| TA-AML2_AML20 | 20.4    | 26.89         | 8.33                       | 20          | 33.82         | 28.46 | 29.58 | 24.09     | 4.7         | 0.39    | 22.5  | 15.48        | 4.7        | 0.36             | 50                 | 52.22             | 21.19        | 53.57             | 1.91        | 41.25                     | 3.11   | 7.47   |         |
| TA-AML2_AML21 | 8.86    | 3.4           | 1.51                       | 2.96        | 3.44          | 10.96 | 21.4  | 9.55      | 36          | 5.49    | 4.64  | 12.44        | 1.96       | 0.09             | 93.33              | 65.75             | 23.53        | 56.25             | 2.48        | 66.2                      | 1.48   | 3.59   |         |
| TA-AML2_AML23 | 40.74   | 5.62          | 1.94                       | 3.76        | 5.82          | 26.59 | 54.59 | 34.53     | 33.09       | 21.48   | 31.97 | 31.21        | 4.77       | 1.2              | 98.29              | 93.99             | 76.43        | 38.1              | 0.87        | 27.97                     | 4.35   | 4.93   |         |
| TA-AML2_AML30 | 11.25   | 6.84          | 8.11                       | 8.59        | 6.75          | 37.1  | 23.63 | 14.35     | 10.87       | 2.46    | 32.51 | 45.25        | 13.18      | 0.69             | 90                 | 85.11             | 72.73        | 41.67             | 0.29        | 45.65                     | 4.21   | 4.36   |         |
| TA-AML2_AML39 | 15.59   | 1.77          | 0                          | 0           | 1.95          | 4.2   | 38.14 | 35.37     | 24.98       | 7.9     | 8.56  | 13.15        | 8.36       | 0.71             | 58.14              | 84.8              | 66.67        | 7.69              | 0.16        | 36.36                     | 1.56   | 13.21  |         |
| TA-AML3_AML7  | 51.51   | 13.85         | 12.5                       | 18.33       | 10.26         | 82.54 | 67.36 | 64.18     | 54.48       | 46.2    | 61.09 | 64.21        | 50.25      | 33.83            | 100                | 63.28             | 31.61        | 68                | 0.97        | 58.33                     | 8.57   | 18.16  |         |
| TA-AML3_AML9  | 14.11   | 10.61         | 5.18                       | 7.08        | 11.22         | 13.23 | 37.46 | 25.5      | 19.06       | 15.45   | 9.32  | 2.84         | 2.83       | 0.57             | 88.42              | 66.56             | 13.97        | 66.67             | 2.6         | 54.35                     | 10.84  | 15.08  |         |
| TA-AML4_AML37 | 22.91   | 16.78         | 16.46                      | 17.81       | 15.99         | 32.5  | 22.83 | 9.41      | 6.5         | 16.09   | 41.42 | 29.2         | 40         | 11.13            | 74.75              | 91.2              | 45.78        | 23.08             | 0.33        | 39.87                     | 3.23   | 24.64  |         |
| TA-AML4_AML38 | 24.15   | 0.43          | 0                          | 0           | 0.44          | 0     | 21.11 | 3.89      | 4.44        | 0       | 11.71 | 3.66         | 0.45       | 0.21             | 94.39              | 52.55             | 7.56         | 41.18             | 2.18        | 40.97                     | 2.48   | 4.19   |         |
| TA-AML4_AML40 | 38.59   | 29.85         | 32.5                       | 24.14       | 37.36         | 56.28 | 63.61 | 55.38     | 33.33       | 50      | 59.84 | 46.27        | 25.76      | 14.12            | 84.38              | 65.38             | 18.71        | 78.48             | 36.76       | 40.44                     | 12.52  | 28.81  |         |
| TA-AML2_AML31 | 11.34   | 1.97          | 0                          | 0.83        | 2.21          | 20.58 | 12.03 | 5.9       | 9.52        | 11.11   | 14.81 | 18.14        | 11.95      | 0.29             | 93.94              | 84.62             | 30           | 18.6              | 1.4         | 54.9                      | 3.09   | 9.58   |         |
| TA-AML3_AML6  | 14      | 6.45          | 4                          | 5.14        | 10.45         | 7.9   | 13.63 | 16.89     | 26.23       | 19.3    | 21.39 | 10.21        | 12.33      | 6.64             | 77.78              | 90.39             | 46.97        | 41.38             | 1.86        | 54.69                     | 11.75  | 9.52   |         |
| TA-AML4_AML8  | 22.07   | 17.82         | 19.23                      | 16.67       | 14.71         | 36.73 | 67.85 | 47.85     | 43.84       | 24.69   | 84.59 | 52.16        | 22.78      | 3.22             | 96.55              | 85.67             | 9.17         | 85.71             | 13.64       | 44.79                     | 7.02   | 21.9   |         |
| TA-AML1_AML13 | 13.09   | 16.39         | 17.5                       | 14.69       | 19.05         | 16.74 | 40.64 | 54.17     | 23.18       | 7.85    | 27.62 | 23.58        | 2.93       | 1.84             | 98.04              | 77.73             | 21.54        | 26.92             | 10.57       | 7.89                      | 2.28   | 5.5    |         |
| TA-AML2_AML33 | 16.71   | 7.07          | 5.56                       | 3.74        | 9.81          | 17.38 | 29.23 | 42.12     | 59.63       | 5.94    | 43.65 | 60.08        | 13.96      | 0.29             | 95.22              | 56.02             | 6.18         | 43.23             | 4.64        | 7.29                      | 4.59   | 9.85   |         |
| TA-AML2_ MDS1 | 17.99   | 42.31         | 27.27                      | 29.27       | 65            | 28    | 50.3  | 46.09     | 19          | 14.93   | 45.44 | 41.95        | 6.39       | 3.29             | 93.36              | 81.39             | 43.12        | 90                | 10.51       | 29.55                     | 14.86  | 12.93  |         |
| TA-AML3_AML36 | 13.38   | 9.98          | 8.57                       | 9.03        | 25.58         | 12.45 | 16.56 | 17.31     | 13.19       | 5.33    | 16.37 | 16.14        | 0.77       | 0.15             | 94.77              | 69.6              | 23.68        | 38.46             | 2.61        | 19.62                     | 1.94   | 0.77   |         |
| TA-AML4_AML14 | 16.69   | 17.34         | 21.36                      | 15.94       | 23.52         | 23.52 | 18.09 | 34.5      | 13.87       | 16.88   | 34.49 | 5.6          | 0.57       | 0.52             | 95.91              | 79.67             | 29.1         | 46.82             | 3.95        | 58.19                     | 11.21  | 6.15   |         |
| TA-AML4_AML15 | 5.87    | 6.99          | 9.59                       | 8.8         | 4.75          | 8.23  | 6.82  | 8.43      | 3.84        | 2.38    | 15.85 | 8.05         | 0.37       | 0.5              | 75.86              | 51.68             | 5.04         | 76.47             | 3.92        | 60.14                     | 2.36   | 2.8    |         |
| TA-AML1_AML18 | 45.96   | 35.21         | 10.99                      | 35.16       | 37.81         | 36.42 | 53.89 | 39.41     | 65.75       | 13.58   | 50.77 | 57.5         | 14.87      | 0.82             | 96.37              | 77.62             | 26.97        | 49.69             | 9.81        | 10.34                     | 5.24   | 10.4   |         |
| TA-AML2_AML19 | 25.14   | 26.81         | 17.77                      | 21.34       | 31.62         | 19.56 | 41.6  | 27.1      | 44.95       | 26.28   | 44.87 | 50.9         | 18.56      | 0.46             | 78.95              | 90.27             | 31.58        | 42.86             | 4.64        | 53.63                     | 6.81   | 7.31   |         |
| TA-AML2_AML29 | 25.38   | 14.46         | 6.29                       | 9.65        | 16.88         | 27.7  | 46.75 | 19.36     | 4.21        | 9.43    | 34.85 | 23.57        | 17.12      | 2.89             | 88.89              | 78.43             | 31.25        | 23.89             | 7.22        | 56.48                     | 5.62   | 4.83   |         |
| TA-AML2_AML41 | 17.41   | 6.32          | 6.48                       | 5.84        | 7.73          | 14.95 | 22.58 | 2.19      | 0.39        | 0.22    | 47.14 | 7.28         | 0.61       | 0.07             | 86.66              | 71.59             | 4.8          | 62.5              | 31.25       | 35.96                     | 19.6   | 25.22  |         |
| TA-AML3_AML4  | 49.28   | 49.3          | 53.55                      | 41.72       | 61.2          | 52.56 | 71.1  | 70.02     | 53.67       | 42.47   | 74.58 | 63.33        | 40.24      | 8.98             | 96.32              | 44.52             | 18.87        | 64                | 2.23        | 71.17                     | 20.12  | 18.98  |         |
| TA-AML4_AML25 | 15.84   | 29.82         | 28.26                      | 34.62       | 25.44         | 63.14 | 58.81 | 58.5      | 81.5        | 38.6    | 67.5  | 30.72        | 7.62       | 2.76             | 94.74              | 44.27             | 26.24        | 29.41             | 5.02        | 15.82                     | 1.76   | 9.25   |         |
| TA-AML2_AML22 | 44      | 23.4          | 50.72                      | 43.2        | 21.58         | 44.16 | 31.15 | 56.07     | 57.05       | 70.51   | 80.28 | 92.14        | 88.77      | 59.67            | 100                | 94.21             | 57.75        | 69.23             | 24.09       | 83.65                     | 81.96  | 89.98  |         |
| TA-AML1_ N1   | 43.71   | 82.63         | 80                         | 74.36       | 87.91         | 86.55 | 83.04 | 87.68     | 93.69       | 62.36   | 73.62 | 81.03        | 61.59      | 24.98            | 98.85              | 97.98             | 97.46        | 73.32             | 15.3        | 77.78                     | 31.33  | 47.93  |         |
| TA-AML1_ N1-3 | 17.19   | 48.67         | 40                         | 44.44       | 57.49         | 73.09 | 75.89 | 78.82     | 64.35       | 17.01   | 73.65 | 39.11        | 5.75       | 0.79             | 99.59              | 97.63             | 95.19        | 53.24             | 3.46        | 31.8                      | 2.79   | 6.19   |         |
| TA-AML1_ N1-5 | 22.5    | 55.59         | 49.44                      | 57.39       | 57.72         | 81.47 | 80.26 | 83.49     | 56.57       | 9.35    | 78.8  | 47.51        | 6.42       | 0.6              | 98.85              | 96.6              | 89.19        | 54.78             | 10.64       | 20.51                     | 1.77   | 4.09   |         |
| TA-AML1_ N1-6 | 26.12   | 39.39         | 37.4                       | 35.77       | 46.05         | 76.65 | 77.47 | 85.1      | 71.46       | 23.77   | 77.09 | 62.81        | 15.56      | 1.12             | 98.37              | 96.14             | 91.71        | 58.89             | 8.54        | 38.04                     | 4.16   | 11.77  |         |
| TA-AML2_ N1-6 | 23.25   | 33.78         | 26.75                      | 27.74       | 46.81         | 70.39 | 77.68 | 85.47     | 67.77       | 15.81   | 74.76 | 56.5         | 8.56       | 0.44             | 98.94              | 97.56             | 95           | 56.69             | 7.67        | 25.47                     | 2.15   | 9.68   |         |
| TA-AML2_ N1-3 | 13.21   | 37            | 32                         | 33.86       | 43.79         | 66.84 | 71.12 | 76.54     | 49.26       | 6.68    | 68.99 | 26.84        | 2.08       | 0.23             | 98.09              | 97.64             | 96.02        | 49.39             | 3.23        | 12                        | 1.32   | 3.52   |         |
| TA-AML2_ N1-4 | 14.19   | 48.2          | 31.71                      | 54          | 48.75         | 75.3  | 73.02 | 77.25     | 38.36       | 3.98    | 80.39 | 29.47        | 2.02       | 0.21             | 99.42              | 97.93             | 97.18        | 46.87             | 2.33        | 19.4                      | 1.07   | 5.47   |         |
| TA-AML3_ N1-6 | 21.3    | 34.88         | 21.08                      | 31.39       | 45.95         | 68.15 | 74.15 | 76.84     | 55.3        | 11.53   | 73.61 | 30.52        | 3.69       | 0.36             | 98.81              | 96.63             | 90.97        | 50.09             | 4.69        | 23.3                      | 1.92   | 7.01   |         |
| TA-AML3_ N1-4 | 15.85   | 59.34         | 54.79                      | 58.64       | 64.34         | 79.62 | 74.01 | 74.22     | 40.52       | 6.35    | 82.79 | 25.61        | 2.67       | 0.43             | 99.24              | 98.58             | 96.27        | 44.74             | 1.75        | 21.71                     | 1.93   | 6.81   |         |
| TA-AML3_ N1-5 | 22.72   | 54.22         | 45.45                      | 55.3        | 56.85         | 81.15 | 78.75 | 78.10     | 45.09       | 9.47    | 81.14 | 21.21        | 2.32       | 0.37             | 99.02              | 96.61             | 89           | 53.12             | 7.23        | 23.45                     | 2.3    | 5.18   |         |
| TA-AML4_ N1-6 | 21.48   | 33.36         | 27.73                      | 27.23       | 43.03         | 68.09 | 74.72 | 73.27     | 51.47       | 11.66   | 76.56 | 26.05        | 3.07       | 0.41             | 99.12              | 95.27             | 91.51        | 53.15             | 5.03        | 28.19                     | 2.82   | 8.57   |         |
| TA-AML4_ N1-3 | 14.6    | 35.95         | 19.15                      | 31.94       | 47.46         | 65.26 | 67.95 | 63.7      | 40.43       | 7.82    | 69.69 | 13.69        | 1.44       | 0.35             | 97.44              | 97.06             | 92.32        | 43.21             | 1.89        | 21.43                     | 1.84   | 3.94   |         |
| TA-AML4_ N1-4 | 15.74   | 48.8          | 3                          |             |               |       |       |           |             |         |       |              |            |                  |                    |                   |              |                   |             |                           |        |        |         |

**% PCNA+ (based on ldu vs. PCNA biaxial gate for progenitor cells)**

|               | Ungated | CD34+CD381<br>CD90+CD33<br>dw | HSC-<br>negCD34+CD<br>38low | MPP-<br>CD34+CD381<br>D38low | CMP-<br>CD34+CD381<br>owCD33mid | GMP   | Myelo/Mon<br>oblast | ProMonocyte | CD14neg<br>Mono | CD14+<br>Mono | ProMyelocyte | Myelocytes | Meta-<br>myelocytes | Mature<br>Granulocyte | Pro-<br>erythroblast | Erythroblast | Late<br>Erythroblast | Pre-B Cells | Mature B<br>cells<br>CD20+CD19+ | Plasma | T Cell | NK Cell |
|---------------|---------|-------------------------------|-----------------------------|------------------------------|---------------------------------|-------|---------------------|-------------|-----------------|---------------|--------------|------------|---------------------|-----------------------|----------------------|--------------|----------------------|-------------|---------------------------------|--------|--------|---------|
| TA-AML1_AML26 | 25.33   | 7.13                          | 6.06                        | 6.52                         | 9.07                            | 5.83  | 10.3                | 22.22       | 33.08           | 25.19         | 30.38        | 48.27      | 40.49               | 12.56                 | 75.14                | 56.95        | 26.57                | 38.89       | 0.73                            | 33.33  | 4.64   | 5.78    |
| TA-AML3_AML35 | 12.08   | 23.94                         | 25.07                       | 24.19                        | 22.15                           | 16.52 | 14.95               | 4.31        | 4.94            | 15.38         | 7.25         | 5.92       | 5.35                | 1.41                  | 77.78                | 44.63        | 26.73                | 28.57       | 0.19                            | 32     | 1.5    | 4.5     |
| TA-AML3_AML5  | 16.95   | 7.73                          | 7.98                        | 8.8                          | 5.35                            | 22.33 | 29.05               | 22.49       | 16.54           | 5.19          | 38.25        | 37.49      | 14.44               | 0.83                  | 100                  | 24.24        | 8.82                 | 59.49       | 0.34                            | 35.47  | 1.11   | 0.62    |
| TA-AML1_AML10 | 10.04   | 15.26                         | 13.16                       | 11.18                        | 17.32                           | 7.22  | 13.87               | 5.45        | 8.5             | 1.63          | 18.94        | 17.9       | 8.14                | 0.46                  | 77.14                | 33.08        | 25                   | 26.92       | 0.21                            | 13.01  | 0.86   | 1.35    |
| TA-AML2_AML32 | 20.09   | 26.03                         | 26.32                       | 27.49                        | 23.81                           | 26.95 | 22.48               | 2.54        | 0.39            | 0.23          | 11.26        | 6.52       | 1.11                | 0.54                  | 96.05                | 19.05        | 0.75                 | 0           | 0.38                            | 13.54  | 0.54   | 0.45    |
| TA-AML2_AP14  | 43.82   | 9.09                          | 0                           | 9.42                         | 11.61                           | 45.72 | 47.39               | 7.97        | 5.94            | 3.53          | 43.24        | 30.51      | 1.58                | 1.73                  | 100                  | 52.98        | 40.91                | 48          | 0.33                            | 46.24  | 1.76   | 5.15    |
| TA-AML3_AP15  | 22.52   | 22.79                         | 5.26                        | 12.7                         | 23.08                           | 22.84 | 24.55               | 5.28        | 6               | 4             | 21.36        | 20.07      | 1.84                | 0.44                  | 77.27                | 43.58        | 21.84                | 30.77       | 0.08                            | 36.36  | 1.22   | 10.02   |
| TA-AML3_AP13  | 10.65   | 9.57                          | 0                           | 5.39                         | 18.11                           | 34.92 | 18.3                | 14.35       | 8.29            | 1.8           | 12.99        | 6.7        | 0.24                | 0.1                   | 87.76                | 34.7         | 13.48                | 28.45       | 0.24                            | 30.64  | 2.88   | 6.22    |
| TA-AML1_AML27 | 12.35   | 2.24                          | 0.52                        | 0.78                         | 2.34                            | 1.52  | 14.75               | 2.94        | 1.2             | 0             | 5.33         | 10.14      | 1.92                | 0.33                  | 70                   | 23.27        | 5                    | 0           | 0                               | 7.02   | 0.84   | 3.06    |
| TA-AML2_AML20 | 8.74    | 6.04                          | 0                           | 7.5                          | 6.76                            | 10.06 | 13.7                | 5.25        | 1.07            | 0.08          | 9.03         | 5.44       | 1.2                 | 0.27                  | 51.16                | 19.13        | 5.96                 | 17.86       | 0.24                            | 22.5   | 1.07   | 3.03    |
| TA-AML2_AML21 | 4.64    | 1.75                          | 0.5                         | 1.5                          | 1.78                            | 6.49  | 11.95               | 3.88        | 8               | 1.1           | 2.38         | 4.15       | 0.49                | 0.08                  | 93.33                | 16.72        | 5.88                 | 10.42       | 0.2                             | 14.08  | 0.22   | 0.35    |
| TA-AML2_AML23 | 11.85   | 0.63                          | 0                           | 0.17                         | 0.89                            | 3.41  | 16.81               | 4.2         | 1.45            | 0.05          | 8.72         | 6.97       | 0.34                | 0                     | 88.89                | 21.96        | 1.79                 | 4.76        | 0.07                            | 2.54   | 1.17   | 0.3     |
| TA-AML2_AML30 | 14.57   | 11.39                         | 10.81                       | 15.1                         | 11.29                           | 46.77 | 40.39               | 18.21       | 10.33           | 1.47          | 44.59        | 33.5       | 5.4                 | 0.17                  | 90                   | 40.44        | 36.36                | 50          | 0.14                            | 34.78  | 1.76   | 1.42    |
| TA-AML2_AML39 | 11.28   | 2.34                          | 0                           | 0.97                         | 2.5                             | 0.7   | 34.72               | 18.32       | 9.34            | 0.97          | 17.85        | 16.8       | 6.24                | 0.26                  | 72.09                | 44.93        | 8.33                 | 23.08       | 0.07                            | 25.76  | 0.8    | 9.32    |
| TA-AML3_AML7  | 34.06   | 11.28                         | 12.5                        | 15                           | 8.55                            | 94.13 | 78.94               | 51.44       | 31.28           | 21.64         | 81.45        | 48.7       | 40.43               | 17.99                 | 100                  | 111          | 7.33                 | 60          | 0.04                            | 41.67  | 2.01   | 2.74    |
| TA-AML3_AML9  | 0.48    | 6.09                          | 0.4                         | 2.47                         | 6.7                             | 7.94  | 30.67               | 11.7        | 2.86            | 1.12          | 16.93        | 4.38       | 3.5                 | 0.24                  | 81.03                | 32.46        | 3.49                 | 40.28       | 0.43                            | 30.23  | 1.58   | 2.09    |
| TA-AML4_AML37 | 3.94    | 0.73                          | 0.18                        | 0.38                         | 1.05                            | 7.5   | 4.18                | 1.53        | 3.47            | 2.3           | 20.04        | 16.79      | 1.5                 | 1.61                  | 36.01                | 42.28        | 9.64                 | 15.38       | 0                               | 23.42  | 0.54   | 12.64   |
| TA-AML4_AML38 | 16.52   | 0.34                          | 0                           | 0                            | 0.35                            | 0     | 27.71               | 4.6         | 5.26            | 1.41          | 13.26        | 2.72       | 0.3                 | 0.18                  | 88.89                | 17.31        | 0.43                 | 29.41       | 0.53                            | 30.83  | 1.4    | 4.95    |
| TA-AML4_AML40 | 9.25    | 2.22                          | 2.5                         | 7.36                         | 5.66                            | 20.45 | 19.89               | 10.22       | 2.38            | 0             | 10.86        | 2.78       | 0.31                | 0.38                  | 36.72                | 10.76        | 2.16                 | 17.72       | 0                               | 1.9    | 0.52   | 2.27    |
| TA-AML2_AML31 | 9.6     | 1.7                           | 0                           | 0.62                         | 1.92                            | 12.76 | 10.42               | 4.19        | 2.38            | 0             | 10.88        | 11.39      | 5.58                | 0.29                  | 96.97                | 41.03        | 20                   | 12.79       | 0.2                             | 36.27  | 1.23   | 3.98    |
| TA-AML3_AML6  | 1.97    | 1.95                          | 4                           | 1.54                         | 2.49                            | 0.47  | 3.15                | 2.1         | 3.03            | 0.57          | 10.1         | 3.19       | 3.02                | 0.71                  | 55.56                | 18.35        | 8.33                 | 13.79       | 0.11                            | 39.06  | 0.56   | 0.22    |
| TA-AML4_AML8  | 6.87    | 5.94                          | 3.85                        | 5.56                         | 8.82                            | 14.8  | 50                  | 15.23       | 9.86            | 3.31          | 60.07        | 15.29      | 5.35                | 0.31                  | 87.93                | 38.36        | 0.83                 | 57.14       | 0                               | 27.08  | 1.58   | 6.05    |
| TA-AML1_AML13 | 11.69   | 15.87                         | 12.5                        | 14.69                        | 18.68                           | 15.43 | 44.12               | 44.13       | 23.1            | 9.09          | 36.58        | 16.41      | 1.61                | 1.79                  | 94.12                | 46.57        | 2.79                 | 23.08       | 2.11                            | 3.95   | 1.46   | 4.12    |
| TA-AML2_AML33 | 8.97    | 4.48                          | 1.85                        | 2.67                         | 6.33                            | 8.94  | 16.02               | 15.38       | 16.51           | 1.15          | 29.45        | 20.88      | 2.09                | 0.08                  | 90.4                 | 31.31        | 1.79                 | 14.92       | 1.62                            | 1.04   | 1.36   | 1.9     |
| TA-AML2_AMP1  | 8.51    | 12.82                         | 9.09                        | 7.32                         | 20                              | 9     | 23.45               | 15.65       | 3.56            | 0.68          | 47.48        | 18.13      | 1.44                | 0.53                  | 86.26                | 40.39        | 6.12                 | 30          | 1.09                            | 5.67   | 1.65   | 1.36    |
| TA-AML2_AML36 | 4.76    | 4.4                           | 0                           | 4.2                          | 10.47                           | 5.99  | 8.87                | 5.77        | 0               | 1.33          | 10.12        | 6.37       | 0.17                | 0.07                  | 74.35                | 21.69        | 2.13                 | 15.38       | 0.15                            | 6.7    | 0.4    | 0.28    |
| TA-AML4_AML14 | 4.7     | 5.93                          | 6.6                         | 5.49                         | 9.41                            | 6.87  | 4.59                | 5.81        | 2.92            | 1.3           | 14.56        | 1.61       | 0.17                | 0.06                  | 81.87                | 27.62        | 0.93                 | 12.2        | 1.51                            | 14.12  | 2.12   | 0.69    |
| TA-AML4_AML15 | 2.71    | 1.8                           | 1.6                         | 2.61                         | 0.88                            | 3.21  | 3.03                | 1.72        | 1.48            | 2.38          | 16.69        | 4.02       | 0.34                | 0.2                   | 70.11                | 25.6         | 0.61                 | 47.06       | 0.16                            | 39.86  | 0.94   | 1.1     |
| TA-AML1_AML18 | 8.04    | 7.59                          | 1.18                        | 6.04                         | 8.5                             | 4.41  | 9.46                | 2.42        | 10.96           | 0             | 10.35        | 7.88       | 0.41                | 0.09                  | 84.4                 | 25.43        | 3.02                 | 3.68        | 2.72                            | 0      | 0.3    | 0.4     |
| TA-AML2_AML19 | 8.76    | 9.51                          | 6.95                        | 9.59                         | 10.37                           | 7.96  | 10.99               | 6.36        | 12.25           | 1.88          | 29.07        | 23.58      | 5.28                | 0.11                  | 52.63                | 42.15        | 8.77                 | 14.29       | 1.37                            | 23.11  | 2.78   | 2.11    |
| TA-AML2_AML29 | 8.68    | 4.53                          | 1.81                        | 3.15                         | 5.25                            | 8.95  | 15.62               | 6.84        | 0.23            | 1.89          | 12.7         | 5.13       | 6.34                | 1.21                  | 70.37                | 31.86        | 8.33                 | 12.97       | 2.74                            | 15.74  | 2.45   | 1.11    |
| TA-AML2_AML41 | 4.59    | 1.72                          | 1.85                        | 1.87                         | 1.45                            | 3.97  | 5.42                | 0.09        | 0.01            | 0.11          | 19.26        | 1.01       | 0.09                | 0                     | 69.79                | 18.93        | 0.8                  | 12.5        | 1.56                            | 7.69   | 3.31   | 2.05    |
| TA-AML3_AML4  | 22.7    | 23.43                         | 19.02                       | 24.14                        | 24.31                           | 27.99 | 33.44               | 20.85       | 9.33            | 6.85          | 44.31        | 32.28      | 15.31               | 0.56                  | 83.33                | 12.3         | 8.81                 | 32          | 0.37                            | 25.97  | 2.03   | 0.76    |
| TA-AML4_AML25 | 3.11    | 8.28                          | 4.77                        | 11.13                        | 8.55                            | 21.54 | 23.19               | 4.08        | 2.64            | 1.13          | 29           | 4.97       | 0.33                | 0.06                  | 61.05                | 4.39         | 1.24                 | 0           | 0.42                            | 4.48   | 0.3    | 0.21    |
| TA-AML2_AML22 | 43.89   | 19.19                         | 49.28                       | 35.48                        | 17.67                           | 48.77 | 35.87               | 75.13       | 76.45           | 84.62         | 84.46        | 93.17      | 91.25               | 66.67                 | 100                  | 66.73        | 15.5                 | 76.92       | 16.13                           | 83.65  | 61.9   | 72.22   |
| TA-AML1_N1-1  | 3.06    | 10.78                         | 10                          | 2.56                         | 14.29                           | 24.37 | 26.44               | 15.61       | 12.07           | 0.23          | 17.51        | 9.61       | 0.48                | 0.05                  | 81.24                | 38.68        | 26.9                 | 22.3        | 4.48                            | 2.47   | 0.28   | 0.57    |
| TA-AML1_N1-3  | 3.46    | 10.9                          | 9.52                        | 12.7                         | 10.18                           | 27.13 | 22.76               | 10.77       | 5.83            | 0.08          | 19.54        | 5.07       | 0.15                | 0.07                  | 87.86                | 39.74        | 4.44                 | 16.6        | 1.83                            | 1.67   | 0.16   | 0.68    |
| TA-AML1_N1-5  | 6.55    | 19.89                         | 11.24                       | 17.39                        | 24.83                           | 43.96 | 40.72               | 25          | 9.53            | 0.12          | 27.93        | 5.58       | 0.24                | 0.1                   | 87.11                | 28.09        | 4.74                 | 16.65       | 6.05                            | 1.28   | 0.3    | 0.57    |
| TA-AML1_N1-6  | 5.58    | 10.1                          | 9.76                        | 5.11                         | 16.12                           | 30.24 | 34.31               | 19.24       | 10.07           | 0.27          | 30.51        | 8.16       | 0.28                | 0.08                  | 85.05                | 34.64        | 13.67                | 19.95       | 4.26                            | 2.48   | 0.38   | 0.85    |
| TA-AML2_N1-6  | 7.16    | 11.71                         | 9.55                        | 8.39                         | 17.38                           | 32.22 | 35.87               | 20.91       | 11.94           | 0.44          | 31.96        | 8.97       | 0.27                | 0.06                  | 89.41                | 38.19        | 13.62                | 19.08       | 3.97                            | 2.11   | 0.22   | 0.89    |
| TA-AML2_N1-3  | 3.67    | 13.66                         | 10                          | 12.7                         | 18.3                            | 28.96 | 25.23               | 13.52       | 6.16            | 0.07          | 21.44        | 5.08       | 0.15                | 0.03                  | 85.29                | 42.37        | 13.43                | 14.14       | 1.57                            | 0.8    | 0.19   | 0.17    |
| TA-AML2_N1-4  | 4.8     | 25.23                         | 17.07                       | 30                           | 22.5                            | 42.09 | 29.47               | 16.25       | 5.54            | 0.16          | 30.26        | 5.27       | 0.17                | 0.04                  | 92.52                | 53.17        | 24.11                | 15.09       | 1.3                             | 1.87   | 0.18   | 0.61    |
| TA-AML3_N1-6  | 9.17    | 18.08                         | 12.05                       | 14.68                        | 25.72                           | 44.26 | 45.99               | 27.29       | 18.35           | 2.8           | 42.55        | 6.99       | 0.44                | 0.09                  | 92.39                | 39.37        | 13.58                | 17.18       | 2.54                            | 4.58   | 0.3    | 1.18    |
| TA-AML3_N1-4  | 6.84    | 21.99                         | 20.55                       | 19.75                        | 25.17                           | 38.86 | 30.09               | 14.48       | 5.93            | 0.36          | 31.82        | 3.93       | 0.24                | 0.07                  | 89.88                | 45.42        | 13.42                | 14.79       | 0.76                            | 2.71   | 0.2    | 0.7     |
| TA-AML3_N1-5  | 7.85    | 28.88                         | 15.58                       | 29.55                        | 36.3                            | 45.38 | 45.41               | 28.04       | 11.02           | 0.71          | 37.95        | 3.28       | 0.27                | 0.08                  | 88.87                | 28.27        | 5.46                 | 15.27       | 4.56                            | 1.03   | 0.36   | 0.69    |
| TA-AML4_N1-6  | 10.17   | 20.23                         | 10                          | 15.11                        | 31.49                           | 49.01 | 51.28               | 28.7        | 19.38           | 5.08          | 47.53        | 6.48       | 0.54                | 0.14                  | 91.42                | 41.22        | 13.37                | 19.1        | 3.03                            | 6.99   | 0.38   | 1.28    |
| TA-AML4_N1-3  | 7.03    | 20.25                         | 6.38                        | 17.28                        | 30.51                           | 49.74 | 41.59               | 23.52       | 14.71           | 2.12          | 42.5         | 4.76       | 0.65                | 0.11                  | 89.89                | 47.09        | 6.12                 | 18.36       | 1.1                             | 4.17   | 0.4    | 0.65    |
| TA-AML4_N1-4  | 5.44    | 26                            | 20.59                       | 26.7                         | 24.42                           | 41.05 | 30.74               | 13.02       | 5               | 0.76          | 32.8         | 3.02       | 0.22                | 0.06                  | 90.66                | 47.07        | 8.72                 | 14.53       | 0.74                            | 4.48   | 0.21   | 0.82    |
| TA-AML4_N1-5  | 8.77    | 35.22                         | 30                          | 33.09                        | 40.94                           | 52.31 | 48.19               | 26.82       | 9.97            | 0.92          | 42.25        | 2.67       | 0.25                | 0.09                  | 90.21                | 30.88        | 3.23                 | 18.3        |                                 |        |        |         |

|                      |                  | % pRb+ (based on IdU vs. pRb biaxial gate) |                          |                                      |                                 |           |                       |                     |             |                 |            |                   |              |            |                     |                       |                      |              |                      |             |                                 |        |        |       |       |          |         |          |       |      |
|----------------------|------------------|--------------------------------------------|--------------------------|--------------------------------------|---------------------------------|-----------|-----------------------|---------------------|-------------|-----------------|------------|-------------------|--------------|------------|---------------------|-----------------------|----------------------|--------------|----------------------|-------------|---------------------------------|--------|--------|-------|-------|----------|---------|----------|-------|------|
|                      |                  | Ungated                                    | CD34+CD38 <sup>low</sup> | HSC/NPP<br>CD33negCD3 <sup>low</sup> | GMP<br>CD34+CD38 <sup>mid</sup> | 34negCD38 | 34neg38neg<br>+Undiff | Myelo/Mono<br>blast | ProMonocyte | CD14neg<br>Mono | CD14+ Mono | 11b+DRneg<br>Mono | ProMyelocyte | Myelocytes | Meta-<br>myelocytes | Mature<br>Granulocyte | Pro-<br>erythroblast | Erythroblast | Late<br>Erythroblast | Pre-B Cells | Mature B<br>cells<br>CD20-CD19+ | Plasma | T Cell | pDC   | mDC   | Basophil | NK Cell | Platelet |       |      |
| CFL-AML<br>(8-21)    | TA-AML1_L1_AML26 | 21.83                                      | 43.36                    | 39.33                                | 53.92                           | 36.06     | 21.25                 | 22.86               | 45.21       | 60.68           | 56.41      | 34.32             | 21.26        | 10.91      | 18.93               | 11.36                 | 4.75                 | 78.61        | 68.07                | 40.94       | 25                              | 33.2   | 2.67   | 41.69 | 67.62 | 67.66    | 26.67   | 24.29    | 25    |      |
|                      | TA-AML3_AML25    | 74.29                                      | 93.64                    | 93.45                                | 94.5                            | 98.51     | 91.03                 | 93.6                | 97.34       | 93.97           | 84.88      | 90.38             | 61.61        | 60.64      | 32.91               | 20.28                 | 13.25                | 92.59        | 90.88                | 85.14       | 91.43                           | 77.72  | 30.86  | 87.88 | 95.74 | 95       | 75.47   | 72.08    | 33.31 |      |
|                      | TA-AML3_AML5     | 65.35                                      | 92.98                    | 92.63                                | 94.11                           | 95.57     | 91.26                 | 67.65               | 94.24       | 87.73           | 78.55      | 48.16             | 60.23        | 96.19      | 48.89               | 19.92                 | 2.12                 | 100          | 51.68                | 23.53       | 88.61                           | 51.36  | 11.15  | 49.65 | 79.15 | 53.46    | 26.09   | 30.59    | 41.67 |      |
| CFL-AML<br>Inv(16)   | TA-AML1_L1_AML10 | 89.45                                      | 97.74                    | 96.24                                | 98.58                           | 98.06     | 84.29                 | 63.52               | 97.76       | 95.28           | 93.75      | 81.02             | 52.68        | 91.8       | 72.04               | 50.34                 | 13.83                | 97.14        | 80.69                | 62.5        | 88.46                           | 63.85  | 21.51  | 83.25 | 97.34 | 80.57    | 36.34   | 69.12    | 0     |      |
|                      | TA-AML2_AML32    | 89.66                                      | 98.61                    | 98.82                                | 98.21                           | 98.68     | 58.79                 | 41.26               | 97.96       | 87.35           | 88.14      | 69.1              | 21.92        | 86.75      | 62.24               | 30.17                 | 10.17                | 98.68        | 49.97                | 8.96        | 80                              | 50.64  | 16.15  | 64.21 | 98.78 | 73.54    | 19.05   | 32.51    | 87.5  |      |
|                      | TA-AML3_APL5     | 97.99                                      | 99.46                    | 94.61                                | 99.58                           | 100       | 99.43                 | 91.87               | 99.52       | 98.5            | 96.89      | 80                | 99.17        | 98.2       | 91.35               | 18.78                 | 3.64                 | 100          | 90.78                | 87.36       | 100                             | 79.25  | 45.45  | 86.63 | 100   | 85.16    | 99.24   | 90.41    | X     |      |
| APL (t(15;17))       | TA-AML3_APL3     | 61.57                                      | 88.99                    | 88.04                                | 90.55                           | 96.51     | 93.48                 | 83.84               | 96.36       | 76.39           | 62.69      | 44.95             | 76.71        | 86.82      | 25.08               | 2.46                  | 1.14                 | 100          | 74.25                | 59.57       | 85.34                           | 67.43  | 34.63  | 63.36 | 100   | 69.13    | 70.59   | 52.16    | 35.59 |      |
|                      | TA-AML2_APL4     | 95.02                                      | 91.79                    | 90.68                                | 92.26                           | 99.52     | 97.97                 | 85.75               | 97.58       | 63.21           | 77.33      | 65.88             | 94.77        | 94.26      | 78.81               | 5.09                  | 3.46                 | 100          | 88.52                | 72.73       | 94                              | 82.44  | 41.62  | 86.73 | 92.31 | 87.36    | 95.57   | 80.02    | 100   |      |
|                      | TA-AML1_AML27    | 98.14                                      | 99.26                    | 97.77                                | 99.36                           | 98.48     | 95.37                 | 91.42               | 99.51       | 99.65           | 96         | 28.26             | 71.48        | 92.48      | 78.26               | 16.55                 | 2.53                 | 98           | 82.66                | 40          | 83.33                           | 78.29  | 8.77   | 86.21 | 95.98 | 95.78    | 78.57   | 76.46    | 26.67 |      |
| FLT3-ITD+<br>NK-AML  | TA-AML3_AML7     | 52.09                                      | 87.18                    | 84.21                                | 89.74                           | 93.65     | 63.42                 | 41.49               | 62.58       | 81.88           | 63.11      | 37.89             | 28.34        | 46.91      | 37.48               | 16.12                 | 7                    | 96.97        | 41.07                | 14.51       | 52                              | 70.5   | 8.33   | 67    | 86.36 | 61.76    | 46.41   | 54.22    | X     |      |
|                      | TA-AML3_AML9     | 34.54                                      | 89.44                    | 84.7                                 | 90.12                           | 89.95     | 59.58                 | 47.76               | 89.18       | 77.56           | 38.54      | 21.35             | 2.84         | 29.8       | 3.86                | 2.23                  | 0.62                 | 95.06        | 51.39                | 9.84        | 51.39                           | 33.84  | 10.08  | 33.07 | 86.15 | 35.73    | 7.32    | 23.09    | 8.66  |      |
|                      | TA-AML2_AML20    | 92.88                                      | 93.96                    | 96.74                                | 92.27                           | 97.7      | 94.52                 | 91.46               | 97.86       | 94.08           | 87.02      | 74.56             | 78.82        | 96.11      | 70.08               | 41.25                 | 6.6                  | 100          | 62.75                | 50.99       | 85.71                           | 84.4   | 27.5   | 84.22 | 88.24 | 94.92    | 21.43   | 81.62    | 50    |      |
|                      | TA-AML2_AML21    | 86.28                                      | 98.08                    | 96.6                                 | 98.16                           | 97.99     | 78.11                 | 68.52               | 98.62       | 98.63           | 76         | 42.86             | 90.88        | 89.11      | 47.09               | 6.03                  | 0.81                 | 100          | 67.68                | 32.35       | 35.42                           | 46.82  | 21.13  | 49.58 | 100   | 52.94    | 89.09   | 27.59    | 0     |      |
|                      | TA-AML2_AML23    | 94.91                                      | 99.62                    | 99.41                                | 99.64                           | 97.84     | 78.6                  | 65.76               | 98.64       | 96.64           | 94.1       | 86.98             | 44.78        | 75.56      | 51.21               | 14.66                 | 4.49                 | 99.15        | 72.44                | 24.64       | 85.71                           | 77.98  | 12.71  | 82.52 | 98.2  | 86.58    | 37.5    | 71.46    | X     |      |
|                      | TA-AML2_AML30    | 68.52                                      | 99.32                    | 96.2                                 | 99.64                           | 96.77     | 86.46                 | 83.5                | 98.8        | 97.9            | 90.06      | 50.63             | 56.85        | 74.08      | 61.32               | 17.4                  | 2.4                  | 95           | 79                   | 63.64       | 87.5                            | 83.56  | 34.78  | 89.97 | 100   | 73.8     | 0       | 55.83    | 2.13  |      |
|                      | TA-AML2_AML39    | 62.26                                      | 92.85                    | 82.76                                | 93.61                           | 95.8      | 67.74                 | 67.18               | 83.31       | 85.67           | 74.4       | 52.73             | 66.02        | 63.72      | 54.47               | 38.95                 | 7.3                  | 100          | 80.84                | 62.5        | 61.54                           | 72.03  | 22.73  | 81.66 | 98.53 | 61.97    | 52.63   | 72.41    | 0     |      |
|                      | TA-AML4_AML37    | 91.79                                      | 97.91                    | 98.82                                | 97.2                            | 100       | 94.5                  | 97.91               | 98.93       | 97.6            | 76.23      | 55.17             | 72.53        | 90.91      | 63.29               | 30.02                 | 14.88                | 99.01        | 77.17                | 68.67       | 53.85                           | 82.57  | 25.32  | 93.12 | 90.91 | 95.56    | 95.17   | 88.98    | 0     |      |
|                      | TA-AML4_AML38    | 66.12                                      | 95.54                    | 84.07                                | 95.89                           | 76        | 75.76                 | 45.86               | 95.3        | 97.32           | 85.94      | 78.87             | 24.53        | 79.42      | 34.21               | 26.56                 | 6.26                 | 97.3         | 45.15                | 5.81        | 82.35                           | 62.46  | 16.84  | 64.51 | 83.72 | 82.03    | 47.17   | 84.86    | 55.26 |      |
|                      | TA-AML4_AML40    | 73.36                                      | 95.77                    | 95.15                                | 97.96                           | 97.19     | 84.55                 | 49.4                | 94.11       | 95.16           | 64.29      | 62                | 28.07        | 76.95      | 32.15               | 16.8                  | 17.94                | 98.88        | 41.38                | 17.99       | 83.54                           | 69.12  | 3.17   | 70.82 | 83.33 | 69.7     | 6.67    | 51.81    | 1.34  |      |
|                      | TA-AML3_AML6     | 71.08                                      | 85.61                    | 84.74                                | 87.06                           | 87.37     | 81.81                 | 74.33               | 91.01       | 78.51           | 72.35      | 34.53             | 35.5         | 87.02      | 26.25               | 27.81                 | 8.77                 | 88.89        | 51.09                | 11.36       | 93.1                            | 48.47  | 26.56  | 54.04 | 91.8  | 82.8     | 11.32   | 37.38    | 4.76  |      |
|                      | TA-AML2_AML31    | 98.49                                      | 99.4                     | 99.04                                | 99.46                           | 98.35     | 97.77                 | 96.16               | 99.39       | 99              | 84.52      | 66.67             | 67.21        | 96.53      | 94.09               | 16.33                 | 3.75                 | 100          | 91.03                | 90          | 100                             | 69.2   | 43.14  | 73.97 | 99.46 | 95.29    | 50      | 56.6     | 0     |      |
|                      | TA-AML4_AML8     | 25.88                                      | 74.26                    | 72.58                                | 73.53                           | 88.73     | 67.36                 | 6.18                | 69          | 48.05           | 41.27      | 36.73             | 23.48        | 62.54      | 13.02               | 3.82                  | 1.03                 | 89.66        | 50.53                | 0.83        | 42.86                           | 27.27  | 5.21   | 46.71 | 69.57 | 30.43    | 0       | 27.09    | 0.28  |      |
|                      | FLT3wt<br>NK-AML | TA-AML1_AML13                              | 54.45                    | 97.35                                | 97.6                            | 96.89     | 98.7                  | 96.19               | 84.61       | 95.82           | 87.88      | 82.62             | 73.33        | 54.12      | 41.48               | 22.64                 | 5.26                 | 7.87         | 95.29                | 66          | 13.4                            | 65.38  | 72.81  | 18.42 | 81.31 | 83.78    | 66.99   | 60       | 74.98 | 4.47 |
|                      |                  | TA-AML3_AML36                              | 47.18                    | 89.61                                | 89.41                           | 90.7      | 94.41                 | 73.07               | 48.49       | 89.3            | 84.62      | 76.6              | 68           | 29.97      | 67.04               | 48.47                 | 8.79                 | 2.88         | 98.86                | 71.81       | 25.08                           | 69.23  | 56.17  | 13.88 | 53.55 | 77.78    | 26.67   | 11.36    | 37.57 | 3.38 |
| TA-AML2_AML33        |                  | 47.33                                      | 92.07                    | 89.21                                | 93.99                           | 97.99     | 47.92                 | 21.5                | 98.78       | 94.69           | 76.76      | 42.38             | 27.66        | 61.02      | 25.68               | 3.22                  | 0.57                 | 99.26        | 65.85                | 17.58       | 43.08                           | 66.49  | 5.21   | 83.41 | 91.76 | 90.82    | 7.58    | 60.92    | 0     |      |
| TA-AML2_AML42        |                  | 22.87                                      | 70.51                    | 59.62                                | 100                             | 77.25     | 51.07                 | 32.07               | 72.75       | 51.3            | 22.69      | 11.54             | 17.82        | 53.92      | 21.72               | 2.82                  | 2.43                 | 97.63        | 61.72                | 19.88       | 50                              | 36.59  | 6.48   | 30.18 | 38.5  | 50       | 66.67   | 25.21    | 3.09  |      |
| TA-AML4_AML14        |                  | 35.53                                      | 68.76                    | 67.9                                 | 80.66                           | 78.08     | 29.61                 | 24.65               | 42.01       | 55.84           | 27.74      | 39.34             | 17.37        | 51.06      | 4.45                | 0.98                  | 1.23                 | 91.52        | 55.83                | 12.87       | 27.42                           | 23.76  | 13.94  | 72    | 64.71 | 10.71    | 16.2    | 10.71    |       |      |
| TA-AML4_AML15        | 72.48            | 89.17                                      | 86.39                    | 92.82                                | 94.5                            | 91.04     | 66.91                 | 93.99               | 95.51       | 55.86           | 66.67      | 32.98             | 85.27        | 83.05      | 4.27                | 3.18                  | 94.25                | 53.96        | 4.72                 | 76.47       | 50.47                           | 38.51  | 63.5   | 58.33 | 25    | 5.33     | 53.75   | 3.7      |       |      |
| AML t(10;11)         | TA-AML2_AML22    | 71.6                                       | 51.28                    | 64.96                                | 50.07                           | 82.43     | 85.08                 | 68.63               | 74.18       | 94.03           | 86.2       | 71.79             | 56.67        | 78.19      | 45.75               | 21.72                 | 4.18                 | 100          | 65.8                 | 14.73       | 84.62                           | 78.13  | 8.65   | 83.11 | 94.55 | 66.67    | 0       | 58.61    | 0     |      |
| ADK-AML<br>Cmpk/Mono | TA-AML1_AML18    | 84.09                                      | 68.15                    | 50.56                                | 73.87                           | 86.9      | 47.32                 | 30.95               | 94.69       | 98.12           | 79.45      | 30.03             | 28.95        | 80.11      | 51.95               | 7.75                  | 3.1                  | 95.53        | 79.3                 | 31.49       | 39.26                           | 64.99  | 0      | 78.57 | 86.27 | 80.92    | 0       | 56.02    | 5.28  |      |
|                      | TA-AML3_AML4     | 62.92                                      | 97.72                    | 97.47                                | 98.29                           | 97.59     | 51.71                 | 16.28               | 92.56       | 89.5            | 71.25      | 50.68             | 30.24        | 68.82      | 44.3                | 22.03                 | 2.06                 | 97.48        | 51.09                | 8.35        | 80                              | 43.18  | 23.38  | 49.29 | 92.86 | 61.11    | 0       | 29.99    | 6.59  |      |
|                      | TA-AML2_AML19    | 85.59                                      | 96.19                    | 95.39                                | 96.12                           | 96.85     | 65.32                 | 75.4                | 93.33       | 98.13           | 76.46      | 58.33             | 44.69        | 72.8       | 65.42               | 13.9                  | 1.3                  | 92.11        | 76.78                | 29.82       | 57.14                           | 75.08  | 15.71  | 77.85 | 80    | 86.6     | 44.5    | 74.95    | 3.19  |      |
|                      | TA-AML2_AML29    | 90.01                                      | 96.42                    | 94.41                                | 97.33                           | 92.86     | 75.64                 | 61.01               | 96.42       | 92.4            | 83.41      | 84.91             | 66.27        | 88.65      | 57.41               | 43.97                 | 11.47                | 96.3         | 65.03                | 60.42       | 90.44                           | 69.96  | 7.87   | 71.89 | 93.99 | 27.27    | 66.67   | 47.36    | 4.92  |      |
|                      | TA-AML2_AML21    | 54.75                                      | 96.44                    | 96.12                                | 98.07                           | 98.36     | 57.09                 | 49.37               | 66.08       | 72.15           | 60.55      | 48.65             | 17.73        | 58.25      | 23.79               | 13.4                  | 6.52                 | 97.35        | 68.73                | 9.6         | 87.5                            | 81.25  | 24.69  | 75.46 | 95.65 | 75.86    | 50      | 63.44    | 15.63 |      |
|                      | TA-AML2_AML25    | 51.14                                      | 81.1                     | 96.13                                | 49.73                           | 97.79     | 80.95                 | 32.48               | 82.15       | 64.63           | 81.94      | 67.3              | 50.91        | 81.36      | 32.25               | 9.78                  | 9.04                 | 97.89        | 65.29                | 37.81       | 58.82                           | 78.66  | 20     | 82.24 | 80    | 72.79    | 53.13   | 67.81    | 3     |      |
| Healthy Donors       | TA-AML1_N1-1     | 13.37                                      | 80.84                    | 86.96                                | 75.82                           | 80.67     | 27.63                 | 31.25               | 82.49       | 79.51           | 69.87      | 31.84             | 15.18        | 23.51      | 15.76               | 6.36                  | 1.86                 | 97.47        | 69.22                | 60.91       | 39.54                           | 36.58  | 4.12   | 40.76 | 89.13 | 68.64    | 5.73    | 22.77    | 0.18  |      |
|                      | TA-AML1_N1-3     | 16.94                                      | 86.44                    | 86.58                                | 86.23                           | 91.93     | 68.01                 | 41.03               | 82.1        | 66.43           | 51.48      | 25.3              | 19.35        | 65.25      | 14.23               | 4.47                  | 3.05                 | 99.27        | 75.34                | 39.93       | 36.64                           | 32.75  | 5.86   | 38.95 | 84.01 | 58.89    | 1.41    | 30.55    | 0.16  |      |
|                      | TA-AML1_N1-5     | 21.47                                      | 82.29                    | 79.41                                | 85.23                           | 90.19     | 53.55                 | 45.71               | 83.39       | 70.64           | 48.48      | 20.54             | 15.2         | 65.19      | 14.54               | 4.75                  | 2.14                 | 98.94        | 63.08                | 31.09       | 31.13                           | 40.53  | 3.21   | 37.72 | 84.54 | 64.86    | 1.07    | 22.01    | 0.28  |      |
|                      | TA-AML1_N1-6     | 19.95                                      | 87.78                    | 87.52                                | 88.82                           | 95.08     | 48.52                 | 66.01               | 86.5        | 74.32           | 63.2       | 33.81             | 23.85        | 68.99      | 20.9                | 4.32                  | 1.86                 | 97.51        | 70.76                | 49.77       | 40.71                           | 33.52  | 3.81   | 46.36 | 72.43 | 57.43    | 2.64    | 32.77    | 0     |      |
|                      | TA-AML3_N1-4     | 22.89                                      | 81.86                    | 92.69                                | 91.33                           | 98.33     | 63.33                 | 69                  | 88.32       | 76.79           | 68.35      | 43.94             | 32.75        | 76.12      | 16.91               | 2.65                  | 0.94                 | 98.6         | 73.38                | 54.56       | 41.7                            | 39.4   | 6.8    | 54.48 | 79.57 | 63.27    | 0.82    | 39.76    | 0     |      |
|                      | TA-AML3_N1-4     | 19.29                                      | 89.77                    | 91.91                                | 87.41                           | 96.95     | 66.99                 | 57.13               | 82.25       | 71.16           | 58.16      | 32.38             | 24.9         | 72.87      | 13.92               | 2.3                   |                      |              |                      |             |                                 |        |        |       |       |          |         |          |       |      |

% S phase

|                 | Ungated | CD34+CD38low | HSC/MPP-CD33negCD34+CD38low | CMP-CD34+CD38lowCD33mid | GMP   | 34negCD38+Undiff | 34neg38negUndiff | Myelo/Mono blast | ProMonocyte | CD14neg Mono | CD14+ Mono | 11b+DRneg Mono | ProMyelocyte | Myelocytes | Meta-myelocytes | Mature Granulocyte | Pro-erythroblast | Erythroblast | Late Erythroblast | Pre-B Cells | Mature B cells CD20+CD19+ | Plasma | T Cell | pDC   | mDC  | Basophil | NK Cell | Platelet |   |
|-----------------|---------|--------------|-----------------------------|-------------------------|-------|------------------|------------------|------------------|-------------|--------------|------------|----------------|--------------|------------|-----------------|--------------------|------------------|--------------|-------------------|-------------|---------------------------|--------|--------|-------|------|----------|---------|----------|---|
| TA-AML1_1_AML26 | 4.53    | 3.73         | 3.75                        | 3.63                    | 3.54  | 4.72             | 11.65            | 4.74             | 2.85        | 0.96         | 0          | 2.3            | 7.46         | 8.61       | 2.91            | 0.15               | 56.07            | 48.24        | 19.69             | 13.89       | 0.13                      | 2.67   | 0.13   | 1.55  | 0    | 3.33     | 0.58    | 0        |   |
| TA-AML3_1_AML25 | 5.74    | 11.96        | 13.82                       | 14.52                   | 10.15 | 3.79             | 7.52             | 9.9              | 1.72        | 0.87         | 3.85       | 0.47           | 2.04         | 1.17       | 0.56            | 0.05               | 62.96            | 40.39        | 20.79             | 5.71        | 0.06                      | 12.19  | 0.33   | 4.26  | 0    | 0        | 1.02    | 0        |   |
| TA-AML3_1_AML5  | 2.85    | 1.09         | 1.16                        | 0.8                     | 2.94  | 8                | 14.19            | 5.19             | 2.6         | 0.93         | 0.04       | 10.59          | 5.77         | 8.14       | 2.04            | 0.07               | 50               | 17.84        | 0                 | 17.72       | 0.07                      | 4.05   | 0.18   | 4.23  | 0    | 0        | 0.11    | 0        |   |
| TA-AML1_1_AML10 | 7.32    | 12.18        | 9.7                         | 13.61                   | 5.01  | 2.18             | 3.84             | 8.9              | 3.26        | 5.55         | 1.39       | 4.11           | 13.28        | 13.75      | 7.16            | 0.31               | 71.43            | 46.85        | 25                | 19.23       | 0.21                      | 12.22  | 0.85   | 4.25  | 0.33 | 1.57     | 1.1     | 0        |   |
| TA-AML2_1_AML32 | 6.15    | 7.64         | 7.68                        | 7.69                    | 6.98  | 5.94             | 3.44             | 6.79             | 0.94        | 0.16         | 0.05       | 0              | 5.37         | 5.64       | 0.85            | 0.36               | 67.11            | 26.31        | 0                 | 0.11        | 8.33                      | 0.25   | 1.83   | 0.9   | 0    | 0        | 0.67    | 0        |   |
| TA-AML3_1_APL5  | 6.64    | 8.14         | 0.7                         | 8.34                    | 2.59  | 2.84             | 4.8              | 7.19             | 1.64        | 1.45         | 0          | 3.33           | 4.72         | 4.5        | 0.35            | 0.17               | 36.36            | 62.03        | 6.9               | 7.69        | 0.08                      | 18.18  | 0.6    | 0     | 0    | 2.44     | 3.27    | X        |   |
| TA-AML3_1_APL3  | 3.79    | 2.32         | 0.96                        | 4.72                    | 7.3   | 5.33             | 4.8              | 5.58             | 6.48        | 2.59         | 0.18       | 4.66           | 8.61         | 6.82       | 0.11            | 0.03               | 66.33            | 40.73        | 15.6              | 17.24       | 0.1                       | 17.47  | 1.34   | 11.11 | 0.67 | 2.94     | 3.58    | 0        |   |
| TA-AML2_1_APL4  | 12.25   | 1.76         | 2.47                        | 0.65                    | 8.41  | 12.1             | 9.31             | 16.22            | 5.96        | 3.55         | 0          | 15.56          | 14.86        | 12.71      | 0.7             | 0.43               | 66.67            | 41.06        | 13.64             | 11          | 0.05                      | 18.5   | 0.56   | 0     | 0    | 15.91    | 2.24    | 0        |   |
| TA-AML1_1_AML27 | 5.49    | 1.26         | 0.3                         | 1.31                    | 0     | 0.29             | 0.93             | 6.26             | 1.5         | 0.8          | 0          | 0              | 1.37         | 2.44       | 5.8             | 0.68               | 0.11             | 46           | 57.03             | 5           | 0                         | 0      | 8.77   | 0.59  | 1.01 | 2.41     | 0       | 2.79     | 0 |
| TA-AML3_1_AML7  | 1.22    | 0            | 0                           | 0                       | 4.76  | 13.74            | 9.98             | 6.43             | 1.68        | 0.22         | 0.07       | 1.51           | 16.73        | 5.56       | 0.57            | 0.06               | 30.3             | 6.52         | 0.26              | 20          | 0                         | 0.24   | 0.91   | 2.94  | 3.59 | 0.27     | X       |          |   |
| TA-AML3_1_AML9  | 2.08    | 0.21         | 0.04                        | 0.21                    | 0.18  | 0.65             | 1.97             | 1.56             | 0.43        | 0            | 0          | 7.68           | 5.15         | 5.11       | 3.11            | 0.05               | 45.53            | 20.76        | 0.96              | 12.5        | 0.15                      | 3.66   | 0.34   | 0.79  | 2.44 | 0.49     | 0.05    |          |   |
| TA-AML2_1_AML20 | 3.28    | 1.21         | 1.09                        | 1.45                    | 2.81  | 0.42             | 2.65             | 5.06             | 2.49        | 0.67         | 0.03       | 5.47           | 2.36         | 2.09       | 0.6             | 0.12               | 32.56            | 27.44        | 1.32              | 10.71       | 0.24                      | 22.5   | 0.52   | 17.65 | 0    | 0        | 1.41    | 0        |   |
| TA-AML2_1_AML21 | 0.79    | 0.28         | 0.21                        | 0.28                    | 0.93  | 4.91             | 3.16             | 1.52             | 0.71        | 4            | 0          | 2.36           | 1.4          | 4.37       | 0.54            | 0.01               | 23.33            | 25.53        | 1.47              | 16.67       | 0.41                      | 11.27  | 0.25   | 0     | 0.42 | 0        | 0.66    | 0        |   |
| TA-AML2_1_AML23 | 4.94    | 0.15         | 0.02                        | 0.16                    | 0.65  | 3.25             | 2.47             | 5.64             | 2.16        | 1            | 0          | 3.16           | 5.47         | 4.24       | 0.17            | 0                  | 46.15            | 35.51        | 0                 | 4.76        | 0                         | 5.93   | 0.7    | 1.8   | 0.19 | 0        | 0.25    | X        |   |
| TA-AML2_1_AML30 | 0.21    | 0.05         | 0.24                        | 0.05                    | 0     | 0.48             | 0.46             | 0.18             | 0.07        | 0.14         | 0.01       | 1.35           | 0.55         | 0.58       | 0.15            | 0                  | 20               | 26.96        | 0                 | 8.33        | 0.07                      | 21.74  | 0      | 0     | 0.24 | 0        | 0.28    | 0        |   |
| TA-AML2_1_AML39 | 4.4     | 0.51         | 0                           | 0.56                    | 0.7   | 3.28             | 3.84             | 13.94            | 9.14        | 5.71         | 0.52       | 12.43          | 2.77         | 3.94       | 1.53            | 0.07               | 41.86            | 47.36        | 4.17              | 2.56        | 0                         | 16.67  | 0.47   | 2.21  | 1.23 | 0        | 4.95    | 0        |   |
| TA-AML4_1_AML37 | 0.2     | 0.01         | 0.01                        | 0                       | 0     | 0.31             | 0.05             | 0.07             | 0.03        | 0.14         | 0          | 0.55           | 0.51         | 1.32       | 0.26            | 0.07               | 1.86             | 26.2         | 0                 | 7.69        | 0                         | 7.59   | 0.06   | 0     | 0.07 | 0.51     | 0.16    | 0        |   |
| TA-AML4_1_AML38 | 5.06    | 0.04         | 0                           | 0.04                    | 0     | 2.48             | 1.88             | 2.02             | 0.45        | 0.16         | 0          | 0.48           | 2.02         | 1.17       | 0.1             | 0.03               | 33.85            | 14.59        | 0.12              | 11.76       | 0.18                      | 12.17  | 0.5    | 0     | 0.11 | 0        | 0.76    | 0        |   |
| TA-AML4_1_AML40 | 3.15    | 1            | 0.84                        | 1.51                    | 2.81  | 4.81             | 4.76             | 5.75             | 4.3         | 0            | 2          | 0              | 8.15         | 1.78       | 0.25            | 0.13               | 16.41            | 13.93        | 1.44              | 16.46       | 0                         | 1.48   | 0.46   | 0     | 0    | 2.4      | 0.09    |          |   |
| TA-AML3_1_AML6  | 0.06    | 0            | 0                           | 0                       | 0.03  | 0.04             | 0.11             | 0.03             | 0.05        | 0.07         | 0.01       | 0.04           | 0.24         | 0.18       | 0.12            | 0                  | 11.11            | 10.81        | 0                 | 3.45        | 0                         | 9.38   | 0.09   | 0     | 0    | 0        | 0       | 0        |   |
| TA-AML2_1_AML31 | 0.15    | 0.06         | 0                           | 0.07                    | 0.82  | 0.38             | 0.06             | 0.11             | 0           | 1.19         | 0          | 0              | 0.46         | 0.84       | 0               | 0                  | 9.09             | 29.49        | 0                 | 2.33        | 0.2                       | 26.47  | 0.33   | 0     | 0.2  | 0        | 0.54    | 0        |   |
| TA-AML4_1_AML8  | 2.29    | 0.99         | 0                           | 2.94                    | 1.02  | 13.43            | 3.52             | 10.71            | 1.95        | 0.1          | 0.05       | 1.21           | 27.95        | 2.55       | 0.07            | 0.02               | 55.17            | 33.94        | 0.42              | 14.29       | 0                         | 1.04   | 0.38   | 2.17  | 0    | 0        | 0.78    | 0.28     |   |
| TA-AML1_1_AML13 | 3.48    | 1.26         | 1.77                        | 3.85                    | 1.96  | 1.01             | 6.78             | 9.18             | 8.9         | 1.88         | 0          | 0.6            | 15.4         | 8.22       | 0.52            | 0.33               | 44.31            | 38.96        | 2.04              | 7.69        | 0.91                      | 0      | 0.31   | 8.11  | 0    | 0        | 0.53    | 0.28     |   |
| TA-AML3_1_AML36 | 4.43    | 1.31         | 1.05                        | 5.81                    | 2.13  | 3.24             | 3.17             | 4.08             | 3.21        | 0            | 0          | 0.59           | 5.17         | 3.45       | 0.07            | 0.02               | 47.88            | 27.26        | 3.49              | 15.38       | 0.23                      | 5.26   | 0.24   | 0     | 0    | 0.21     | 0.21    |          |   |
| TA-AML2_1_AML33 | 0.03    | 0            | 0                           | 0                       | 0.01  | 0                | 0.06             | 0.01             | 0.18        | 0            | 0.07       | 0              | 0.05         | 0          | 0.01            | 0.01               | 0.07             | 0.09         | 0.07              | 0.15        | 0.03                      | 0      | 0.03   | 0     | 0    | 0        | 0.05    | 0        |   |
| TA-AML2_1_AML42 | 2.69    | 6.41         | 3.85                        | 15                      | 1.25  | 3.57             | 5.44             | 6.81             | 6.09        | 1.66         | 0.23       | 2.87           | 11.43        | 2.17       | 0.19            | 0                  | 51.66            | 32.53        | 3.98              | 0           | 0.36                      | 3.24   | 0.49   | 0.5   | 0    | 0        | 0.26    | 0        |   |
| TA-AML4_1_AML14 | 2.94    | 2.21         | 2.08                        | 4.01                    | 1.5   | 6.06             | 1.49             | 1.21             | 1.15        | 0            | 0          | 0.32           | 8.85         | 1.24       | 0.05            | 0.08               | 43.27            | 29.84        | 2.43              | 8.56        | 0.97                      | 6.21   | 0.97   | 4     | 0    | 0        | 0.52    | 0        |   |
| TA-AML4_1_AML15 | 0.71    | 0.33         | 0.48                        | 0.14                    | 0.38  | 1.65             | 0.26             | 0.32             | 0.13        | 0            | 0          | 0.12           | 0.84         | 1.44       | 0.06            | 0.1                | 50.57            | 22.84        | 0.57              | 23.53       | 0.16                      | 16.22  | 0.16   | 0     | 0    | 0        | 0.16    | 0.06     |   |
| TA-AML2_1_AML22 | 7.63    | 10.11        | 8.18                        | 10.26                   | 7.99  | 7.96             | 11.14            | 6.05             | 2.78        | 1.35         | 0          | 30             | 17.43        | 9.77       | 1.03            | 0.24               | 62.01            | 37.43        | 1.36              | 23.08       | 0.3                       | 3.85   | 3.2    | 9.09  | 0    | 0        | 5.56    | 0        |   |
| TA-AML1_1_AML18 | 4.14    | 2.35         | 1.12                        | 2.77                    | 1.32  | 2.18             | 3.03             | 4.12             | 1.09        | 10.96        | 0          | 0              | 10.57        | 7.82       | 0.26            | 0.02               | 33.62            | 34.91        | 3.69              | 7.98        | 3.14                      | 0      | 0.27   | 21.57 | 0    | 0        | 0.46    | 0        |   |
| TA-AML1_1_AML4  | 10.48   | 7.08         | 6.9                         | 7.49                    | 7.27  | 11.24            | 7.36             | 11.61            | 8.07        | 4.13         | 5.48       | 7.88           | 19.98        | 22.15      | 10.9            | 0.28               | 40.7             | 14.1         | 1.45              | 28          | 0.16                      | 11.17  | 0.77   | 1.79  | 5.56 | 0        | 0.23    | 0        |   |
| TA-AML2_1_AML19 | 0.8     | 0.62         | 0.46                        | 0.74                    | 0.55  | 3.34             | 0.59             | 0.64             | 0.28        | 1.19         | 0.09       | 0.088          | 2.52         | 2.43       | 0.31            | 0.02               | 13.16            | 43.06        | 1.75              | 14.29       | 0.17                      | 9.52   | 0.83   | 0     | 0    | 0.69     | 0       |          |   |
| TA-AML2_1_AML29 | 1.59    | 0.64         | 0.45                        | 0.73                    | 1.22  | 0.73             | 2.4              | 2.01             | 0.82        | 0            | 0          | 1.96           | 3.6          | 1.9        | 0.85            | 0.15               | 44.44            | 30.8         | 2.08              | 8.53        | 1.23                      | 4.63   | 0.9    | 0     | 0    | 0        | 0.43    | 0        |   |
| TA-AML2_1_AML41 | 5.85    | 0.8          | 0.78                        | 0.97                    | 2.8   | 7.83             | 4.37             | 4.96             | 0.16        | 0.04         | 0.11       | 0.088          | 18.8         | 1.33       | 0.11            | 0.03               | 41.01            | 35.74        | 0                 | 12.5        | 1.56                      | 7.87   | 3.4    | 4.35  | 0    | 0        | 2.84    | 0.05     |   |
| TA-AML2_1_AML25 | 1.52    | 0.51         | 0.55                        | 0.48                    | 2.88  | 2.5              | 3.73             | 2.52             | 0.68        | 0            | 0.56       | 0.78           | 21.06        | 4.72       | 0.29            | 0.05               | 22.11            | 10.41        | 0.83              | 0           | 0                         | 1.49   | 0.15   | 0     | 0.08 | 0        | 0.14    | 0.09     |   |
| TA-AML1_1_N1-1  | 3.47    | 8.98         | 7.25                        | 10.99                   | 12.61 | 10.72            | 25.6             | 16.02            | 11.22       | 7.91         | 0.09       | 0.83           | 25.64        | 10.79      | 0.41            | 0.06               | 60.53            | 54.26        | 46.19             | 20.84       | 3.55                      | 1.23   | 0.23   | 5.65  | 0.19 | 0        | 0.54    | 0.12     |   |
| TA-AML1_1_N1-3  | 3.18    | 7.02         | 7.79                        | 6.59                    | 6.95  | 8.72             | 12.9             | 13.88            | 8.9         | 4.68         | 0.04       | 0.57           | 18.03        | 4.89       | 0.16            | 0.06               | 56.22            | 52.05        | 13.68             | 16.22       | 1.43                      | 0.42   | 0.1    | 5.19  | 0.37 | 0        | 0.5     | 0.24     |   |
| TA-AML1_1_N1-5  | 6.42    | 8.99         | 5.39                        | 12.75                   | 12.81 | 11.61            | 21.67            | 23.34            | 18.38       | 7.12         | 0.04       | 0.15           | 23.15        | 5.29       | 0.18            | 0.08               | 56.37            | 44.14        | 8.06              | 13.93       | 4.48                      | 0.8    | 0.29   | 7.66  | 1.5  | 0.21     | 0.66    | 0.15     |   |
| TA-AML1_1_N1-6  | 6.37    | 5.35         | 2.59                        | 10.53                   | 9.14  | 14.13            | 36.37            | 21.71            | 15.07       | 7.92         | 0.16       | 2.39           | 28.15        | 9.38       | 0.29            | 0.08               | 61.09            | 45.64        | 20.08             | 17.97       | 3.39                      | 1.91   | 0.26   | 3.31  | 0.99 | 0.41     | 0.81    | 0        |   |
| TA-AML3_1_N1-6  | 6.39    | 4.76         | 3.03                        | 8.09                    | 7.59  | 14.18            | 26.14            | 20.14            | 13.75       | 5.43         | 0.08       | 2.9            | 26.38        | 6.08       | 0.18            | 0.05               | 60.15            | 41.7         | 16.5              | 13.37       | 1.69                      | 2.08   | 0.18   | 3.67  | 0    | 0        | 1.05    | 0        |   |
| TA-AML3_1_N1-4  | 3.52    | 6.65         | 4.26                        | 11.19                   | 9.71  | 11.99            | 22.4             | 16.91            | 9.63        | 2.25         | 0.03       | 1.52           | 20.01        | 3.15       | 0.1             | 0.06               | 49.01            | 50.1         | 21.96             | 12.51       | 0.52                      | 1.16   | 0.14   | 5.78  | 1.33 | 0        | 0.56    | 0.23     |   |
| TA-AML3_1_N1-5  | 6.01    | 7.63         | 6.22                        | 9.59                    | 1     |                  |                  |                  |             |              |            |                |              |            |                 |                    |                  |              |                   |             |                           |        |        |       |      |          |         |          |   |



|               |                 | % M phase |              |                      |                     |      |                  |                  |                  |             |              |            |                |              |            |                 |                    |                  |              |                   |             |                           |        |        |      |      |          |         |          |      |      |      |   |
|---------------|-----------------|-----------|--------------|----------------------|---------------------|------|------------------|------------------|------------------|-------------|--------------|------------|----------------|--------------|------------|-----------------|--------------------|------------------|--------------|-------------------|-------------|---------------------------|--------|--------|------|------|----------|---------|----------|------|------|------|---|
|               |                 | Ungated   | CD34+CD381ow | HSC/MPP-CD34+CD38low | CD34+CD381owCD33mid | GMP  | 34negCD38+Undiff | 34neg38negUndiff | Myelo/Mono blast | ProMonocyte | CD14neg Mono | CD14+ Mono | 11b+DRneg Mono | ProMyelocyte | Myelocytes | Meta-myelocytes | Mature Granulocyte | Pro-erythroblast | Erythroblast | Late Erythroblast | Pre-B Cells | Mature B cells CD20-CD19+ | Plasma | T Cell | pDC  | mDC  | Basophil | NK Cell | Platelet |      |      |      |   |
| TA-AML1_AML26 | TbA-[8,21]      | 0.03      | 0.04         | 0.03                 | 0.08                | 0.03 | 0.13             | 0.09             | 0.09             | 0           | 0            | 0          | 0              | 0.01         | 0.01       | 0.01            | 0.01               | 0                | 1.17         | 0.98              | 0           | 0.94                      | 0      | 0      | 0    | 0    | 0        | 0       | 0        | 0    |      |      |   |
| TA-AML3_AML25 |                 | 0.13      | 0.15         | 0.12                 | 0.33                | 0.13 | 0                | 0.11             | 0.19             | 0           | 0            | 0          | 0              | 0.04         | 0.02       | 0.01            | 0                  | 3.7              | 1.3          | 0                 | 1.07        | 0.57                      | 0.02   | 0      | 0    | 0    | 0        | 0       | 0.07     | 0    |      |      |   |
| TA-AML3_AML5  |                 | 0.01      | 0.02         | 0.02                 | 0                   | 0.01 | 0                | 0                | 0.02             | 0           | 0            | 0          | 0              | 0            | 0.01       | 0               | 0                  | 0                | 0            | 0.96              | 0           | 0                         | 0.01   | 0      | 0    | 0    | 0        | 0       | 0        | 0    | 0    |      |   |
| TA-AML1_AML10 | TbA-Inv(16)     | 0.02      | 0.03         | 0.03                 | 0.04                | 0.01 | 0.02             | 0                | 0.01             | 0.01        | 0            | 0          | 0              | 0.02         | 0          | 0.02            | 0                  | 0                | 0.76         | 0                 | 0           | 0.03                      | 0.13   | 0      | 0.14 | 0    | 0        | 0       | 0        | 0    |      |      |   |
| TA-AML2_AML32 |                 | 0.08      | 0.14         | 0.12                 | 0.16                | 0.04 | 0.11             | 0                | 0.04             | 0           | 0            | 0          | 0              | 0            | 0.08       | 0               | 0                  | 1.32             | 1.03         | 0                 | 0.09        | 0                         | 0.01   | 0      | 0    | 0    | 0        | 0       | 0.11     | 0    |      |      |   |
| TA-AML3_AP15  | TbA-(15,17)     | 0.01      | 0.02         | 0                    | 0.02                | 0    | 0                | 0.08             | 0.01             | 0           | 0            | 0          | 0              | 0            | 0          | 0               | 0                  | 0                | 0.36         | 0                 | 0           | 0.08                      | 0      | 0      | 0    | 0    | 0        | 0       | 0        | 0    | X    |      |   |
| TA-AML3_AP13  |                 | 0.05      | 0            | 0                    | 0                   | 0.32 | 0.03             | 0                | 0.04             | 0           | 0            | 0          | 0              | 0.02         | 0          | 0               | 0                  | 1.02             | 2.01         | 0.35              | 0.86        | 0.22                      | 0.2    | 0      | 0    | 0    | 0        | 0       | 0        | 0.04 | 0    |      |   |
| TA-AML2_AP14  |                 | 0.05      | 0            | 0                    | 0                   | 0.02 | 0.16             | 0.04             | 0.04             | 0.04        | 0            | 0          | 0              | 0            | 0          | 0               | 0                  | 0                | 0.66         | 0                 | 1           | 0.62                      | 0      | 0      | 0    | 0    | 0        | 0.06    | 0.07     | 50   | 0    |      |   |
| TA-AML1_AML27 | TbA-NI-FLT3-ITD | 0.08      | 0            | 0                    | 0                   | 0    | 0.13             | 0.19             | 0.02             | 0.01        | 0            | 0          | 0              | 0            | 0          | 0               | 0                  | 0                | 1.55         | 0                 | 0           | 0                         | 0      | 0.02   | 0    | 0    | 0        | 0       | 0        | 0    | 0    |      |   |
| TA-AML3_AML7  |                 | 0.02      | 0            | 0                    | 0                   | 0    | 0                | 0.2              | 0.01             | 0.01        | 0.02         | 0          | 0.01           | 0            | 0          | 0               | 0                  | 0                | 0.52         | 0.26              | 0           | 0.04                      | 0      | 0      | 0    | 0    | 0        | 0       | 0        | 0    | 0    | X    |   |
| TA-AML3_AML9  |                 | 0.02      | 0            | 0                    | 0                   | 0    | 0.1              | 0.03             | 0.04             | 0           | 0            | 0          | 0              | 0            | 0          | 0               | 0                  | 0.74             | 0.82         | 0                 | 0           | 0.03                      | 0      | 0      | 0    | 0    | 0        | 0       | 0        | 0    | 0    | 0    |   |
| TA-AML2_AML20 |                 | 0.02      | 0            | 0                    | 0                   | 0.03 | 0                | 0                | 0.01             | 0           | 0            | 0          | 0              | 0            | 0          | 0               | 0                  | 0                | 0.86         | 0.66              | 0           | 0.06                      | 1.25   | 0      | 0    | 0    | 0        | 0       | 0        | 0    | 0.2  | 0    |   |
| TA-AML2_AML21 |                 | 0.02      | 0.01         | 0                    | 0.01                | 0    | 0                | 0                | 0.01             | 0           | 0            | 0          | 0              | 0            | 0          | 0               | 0                  | 0                | 1.52         | 0                 | 0           | 0                         | 0      | 0.01   | 0    | 0    | 0        | 0       | 0        | 0    | 0    | 0    |   |
| TA-AML2_AML23 |                 | 0.13      | 0            | 0                    | 0.01                | 0.05 | 0                | 0                | 0.09             | 0.02        | 0            | 0          | 0              | 0            | 0          | 0               | 0                  | 0                | 1.64         | 1.43              | 0           | 0.29                      | 0      | 0.03   | 0    | 0    | 0        | 0       | 0        | 0    | 0    | X    |   |
| TA-AML2_AML30 |                 | 0.01      | 0            | 0                    | 0                   | 0    | 0.03             | 0.02             | 0.01             | 0.01        | 0            | 0          | 0              | 0            | 0.03       | 0               | 0                  | 0                | 0.31         | 0                 | 0           | 0                         | 0.05   | 0      | 0.01 | 0    | 0        | 0       | 0        | 0    | 0    | 0    |   |
| TA-AML2_AML39 |                 | 0.04      | 0            | 0                    | 0                   | 0.7  | 0.06             | 0.08             | 0.07             | 0.05        | 0.01         | 0.03       | 0.18           | 0.04         | 0.04       | 0.01            | 0.03               | 0                | 0            | 0                 | 0           | 0                         | 0.05   | 0      | 0    | 0    | 0        | 0       | 0        | 0    | 0    | 0    |   |
| TA-AML4_AML37 |                 | 0.02      | 0            | 0                    | 0                   | 0    | 0                | 0.01             | 0                | 0.02        | 0            | 0          | 0.02           | 0            | 0          | 0.06            | 0                  | 0                | 1.63         | 0                 | 0           | 0                         | 0      | 0      | 0    | 0    | 0        | 0       | 0        | 0.24 | 0    | 0    |   |
| TA-AML4_AML38 |                 | 0.23      | 0            | 0                    | 0                   | 0    | 0.1              | 0.1              | 0.07             | 0           | 0.08         | 0          | 0              | 0            | 0.1        | 0               | 0                  | 0.31             | 0.6          | 0.15              | 0           | 0.88                      | 0.81   | 0      | 0    | 0    | 0        | 0       | 0        | 0.03 | 0    | 0    |   |
| TA-AML4_AML40 | 0.07            | 0         | 0            | 0                    | 0                   | 0.09 | 0.18             | 0.11             | 0                | 0           | 0            | 0          | 0              | 0            | 0          | 0               | 0                  | 0.97             | 0            | 0                 | 0           | 0                         | 0.01   | 0      | 0    | 0    | 0        | 0       | 0.13     | 0    | 0    |      |   |
| TA-AML3_AML6  | TbA-FLT3-TKD    | 0.02      | 0            | 0                    | 0                   | 0    | 0                | 0                | 0                | 0           | 0            | 0          | 0              | 0            | 0          | 0               | 0                  | 0                | 6.69         | 4.55              | 0           | 0                         | 0      | 0      | 0    | 0    | 0        | 0       | 0        | 0    | 0    | 0    |   |
| TA-AML2_AML31 |                 | 0.02      | 0            | 0                    | 0                   | 0    | 0                | 0.01             | 0.02             | 0           | 0            | 0          | 0              | 0.23         | 0          | 0               | 0                  | 3.03             | 0            | 0                 | 0           | 0                         | 0      | 0      | 0    | 0    | 0        | 0       | 0        | 0    | 0    | 0    |   |
| TA-AML4_AML8  |                 | 0.04      | 0            | 0                    | 0                   | 0    | 0                | 0                | 0.1              | 0           | 0            | 0          | 0.4            | 0.04         | 0          | 0               | 0                  | 0                | 1.41         | 0                 | 0           | 0                         | 0      | 0      | 0.01 | 0    | 0        | 0       | 0        | 0    | 0    | 0.01 | 0 |
| TA-AML1_AML13 | TbA-FLT3wt      | 0.11      | 0.13         | 0.1                  | 0.18                | 0    | 0                | 0.08             | 0.06             | 0.38        | 0.08         | 0          | 0.04           | 0.11         | 0.1        | 0               | 0                  | 0.78             | 1.61         | 0.32              | 0           | 6.95                      | 0      | 0      | 0    | 0    | 0        | 0       | 0        | 0    | 0    | 0    |   |
| TA-AML3_AML36 |                 | 0.45      | 0.07         | 0.08                 | 0                   | 0.13 | 0.08             | 0.08             | 0.06             | 0           | 0            | 0          | 0              | 0            | 0          | 0               | 0                  | 2.61             | 2.29         | 0.77              | 0           | 1.88                      | 0      | 0.01   | 5.56 | 0    | 0        | 0.57    | 0        | 0    | 0    | 0    |   |
| TA-AML2_AML33 |                 | 0.08      | 0            | 0                    | 0                   | 0    | 0.24             | 0.06             | 0.04             | 0           | 0            | 0          | 0              | 0            | 0.02       | 0.03            | 0                  | 0.57             | 0.91         | 0                 | 0.77        | 0.1                       | 0      | 0      | 0    | 0    | 0        | 0       | 0        | 0    | 0    | 0    | 0 |
| TA-AML2_AML42 |                 | 0.1       | 0            | 0                    | 0                   | 0    | 0.03             | 0.11             | 0.4              | 0           | 0            | 0          | 0              | 0            | 0          | 0.07            | 0.01               | 0                | 1.9          | 1.66              | 0.61        | 0                         | 0.72   | 0      | 0    | 0    | 0        | 0       | 0        | 0    | 0    | 0    |   |
| TA-AML4_AML14 |                 | 0.14      | 0.12         | 0.11                 | 0.17                | 0    | 0.08             | 0.12             | 0.03             | 0           | 0            | 0          | 0              | 0            | 0          | 0               | 0                  | 1.46             | 1.15         | 2.05              | 0.15        | 0.07                      | 0      | 0.02   | 0    | 0    | 0        | 0       | 0        | 0    | 0.01 | 0    |   |
| TA-AML4_AML15 | 0.03            | 0.03      | 0.06         | 0                    | 0                   | 0.05 | 0                | 0                | 0                | 0           | 0            | 0          | 0              | 0            | 0          | 0               | 1.15               | 0.78             | 0.21         | 0                 | 0.78        | 0                         | 0      | 0      | 0    | 0    | 0        | 0       | 0        | 0    | 0    | 0    |   |
| TA-AML2_AML22 | TbA-MLL         | 0.26      | 0.5          | 0.77                 | 0.48                | 0.61 | 0.24             | 0.4              | 0.19             | 0.03        | 0            | 0          | 0              | 0.1          | 0          | 0               | 0                  | 1.18             | 0.19         | 0                 | 0.91        | 0                         | 0.08   | 0      | 0    | 0    | 0        | 0       | 0.22     | 0    | 0    |      |   |
| TA-AML1_AML18 |                 | 0.09      | 0.31         | 0                    | 0.41                | 0.08 | 0                | 0.16             | 0.07             | 0.01        | 0            | 0          | 0              | 0.14         | 0.13       | 0.05            | 0                  | 0.24             | 1.55         | 0                 | 0           | 0.66                      | 0      | 0.01   | 0    | 0    | 0        | 0       | 0        | 0    | 0.01 | 0    | 0 |
| TA-AML3_AML4  |                 | 0.35      | 0.55         | 0.59                 | 0.36                | 0.36 | 0.4              | 0.16             | 0.63             | 0.3         | 0            | 0          | 0              | 0            | 0.11       | 0.22            | 0.14               | 0.04             | 0.02         | 3.1               | 0.9         | 0                         | 0      | 0      | 0    | 0    | 0        | 0       | 5.56     | 0    | 0    | 0    | 0 |
| TA-AML2_AML19 |                 | 0.02      | 0.02         | 0.01                 | 0.02                | 0    | 0                | 0                | 0.02             | 0           | 0            | 0          | 0              | 0            | 0.09       | 0.02            | 0                  | 0                | 0.25         | 1.75              | 0           | 0.17                      | 0      | 0.01   | 0    | 0    | 0        | 0       | 0        | 0    | 0    | 0    | 0 |
| TA-AML2_AML29 |                 | 0.15      | 0.13         | 0.09                 | 0.16                | 0.22 | 0.06             | 0.09             | 0.09             | 0.25        | 0.23         | 1.89       | 0              | 0            | 0          | 0.06            | 0                  | 0                | 0.08         | 0                 | 1.72        | 0                         | 0.36   | 0      | 0    | 0.43 | 0        | 0       | 0        | 0    | 0    | 0    | 0 |
| TA-AML2_AML41 | TbA-CmplkMono   | 0.21      | 0            | 0                    | 0                   | 0    | 0.09             | 0.08             | 0.25             | 0.01        | 0            | 0          | 0              | 0.07         | 0          | 0               | 0.02               | 0.77             | 1.28         | 1.6               | 0           | 17.19                     | 0      | 0.02   | 0    | 0    | 0        | 0       | 0        | 0.13 | 0    | 0    |   |
| TA-AML4_AML25 |                 | 0.07      | 0            | 0                    | 0                   | 0    | 0                | 0.08             | 0                | 0           | 0            | 0          | 0              | 0            | 0          | 0               | 0                  | 0.85             | 0.41         | 0                 | 2.51        | 0                         | 0      | 0      | 0    | 0    | 0        | 0       | 0        | 0    | 0    | 0    | 0 |
| TA-AML1_N1-1  | TbA-Normal      | 0.07      | 0            | 0                    | 0                   | 0    | 0.36             | 0.1              | 0                | 0.11        | 0.02         | 0          | 0.04           | 0.11         | 0          | 0               | 0                  | 0.35             | 1.76         | 1.27              | 0.2         | 0.38                      | 0      | 0      | 0    | 0    | 0        | 0       | 0        | 0    | 0    | 0    |   |
| TA-AML1_N1-3  |                 | 0.07      | 0            | 0                    | 0                   | 0    | 0.1              | 0                | 0.08             | 0           | 0.05         | 0          | 0              | 0.08         | 0.02       | 0               | 0                  | 1.04             | 2.16         | 0.37              | 0.19        | 0.42                      | 0      | 0      | 0.1  | 0    | 0        | 0       | 0        | 0    | 0    | 0    | 0 |
| TA-AML1_N1-5  |                 | 0.23      | 0.54         | 0.49                 | 0.67                | 0.27 | 0.29             | 1.07             | 0.58             | 0.26        | 0.06         | 0          | 0              | 0.23         | 0.16       | 0.01            | 0                  | 0.83             | 1.71         | 0.33              | 0.48        | 1.33                      | 0      | 0.01   | 0.41 | 0.3  | 0        | 0       | 0.02     | 0    | 0    | 0    | 0 |
| TA-AML1_N1-6  |                 | 0.19      | 0.1          | 0.15                 | 0                   | 0    | 0.18             | 0.25             | 0.23             | 0.3         | 0.1          | 0          | 0              | 0.18         | 0.16       | 0.02            | 0                  | 0.71             | 2.4          | 0.83              | 0.56        | 1.79                      | 0      | 0      | 0.07 | 0    | 0        | 0       | 0        | 0.04 | 0    | 0    | 0 |
| TA-AML3_N1-4  |                 | 0.2       | 0.21         | 0                    | 0.58                | 0    | 0.22             | 0.24             | 0.36             | 0.15        | 0.13         | 0          | 0              | 0.22         | 0.12       | 0               | 0                  | 1.12             | 2.4          | 0.27              | 0.47        | 0.78                      | 0.14   | 0.01   | 0    | 0.68 | 0        | 0       | 0.04     | 0    | 0    | 0    | 0 |
| TA-AML3_N1-4  |                 | 0.09      | 0.51         | 0.85                 | 0                   | 0    | 0.09             | 0.06             | 0.22             | 0.04        | 0            | 0          | 0              | 0.07         | 0.02       | 0               | 0                  | 0.52             | 2.59         | 0.75              | 0.28        | 0.28                      | 0      | 0.01   | 0    | 0    | 0        | 0       | 0        | 0    | 0    | 0    | 0 |
| TA-AML3_N1-5  |                 | 0.19      | 0.27         | 0.48                 | 0                   | 0    | 0.45             | 0.49             | 0.34             | 0.05        | 0            | 0          | 0              | 0.25         | 0.03       | 0               | 0                  | 0.49             | 1.41         | 0.08              | 0.38        | 0.42                      | 0      | 0      | 0    | 0    | 0        | 0       | 0.03     | 0    | 0    | 0    |   |
| TA-AML2_N1-6  |                 | 0.21      | 0.23         | 0                    | 0.35                | 0    | 0.27             | 0.15             | 0.52             | 0.28        | 0.05         | 0          | 0              | 0.2          | 0.2        | 0.02            | 0                  | 0.92             | 3.04         | 0.71              | 0.78        | 1.51                      | 0      | 0      | 0.18 | 0    | 0        | 0       | 0        | 0    | 0    | 0    | 0 |
| TA-AML2_N1-3  |                 | 0.07      | 0            | 0                    | 0                   | 0    | 0.07             | 0.08             | 0.15             | 0.26        | 0            | 0          | 0              | 0.05         | 0.03       | 0               | 0                  | 0.16             | 3.           |                   |             |                           |        |        |      |      |          |         |          |      |      |      |   |

|               |                     | % Apoptotic (cleaved-PARP) |                                       |                                                                         |                                              |      |                      |                      |                     |             |                 |            |                                |              |            |                     |                       |                      |              |                      |             |                                                          |        |        |      |      |          |         |          |      |   |
|---------------|---------------------|----------------------------|---------------------------------------|-------------------------------------------------------------------------|----------------------------------------------|------|----------------------|----------------------|---------------------|-------------|-----------------|------------|--------------------------------|--------------|------------|---------------------|-----------------------|----------------------|--------------|----------------------|-------------|----------------------------------------------------------|--------|--------|------|------|----------|---------|----------|------|---|
|               |                     | Ungated                    | CD34 <sup>+</sup> CD38 <sup>low</sup> | HSC/NFP<br>CD3 <sup>neg</sup> CD3<br>4 <sup>+</sup> CD38 <sup>low</sup> | CMP<br>CD34 <sup>+</sup> CD38 <sup>mid</sup> | GMP  | 34negCD38<br>+Undiff | 34neg38neg<br>Undiff | Myelo/Mono<br>blast | ProMonocyte | CD14neg<br>Mono | CD14+ Mono | 11b <sup>+</sup> DRneg<br>Mono | ProMyelocyte | Myelocytes | Meta-<br>myelocytes | Mature<br>Granulocyte | Pro-<br>erythroblast | Erythroblast | Late<br>Erythroblast | Pre-B Cells | Mature B<br>cells<br>CD20 <sup>+</sup> CD19 <sup>+</sup> | Plasma | T Cell | pDC  | mDC  | Basophil | NK Cell | Platelet |      |   |
| TA-AML1_AML26 | TbA-[8,21]          | 0.02                       | 0.05                                  | 0.06                                                                    | 0                                            | 0.02 | 0.03                 | 0.14                 | 0                   | 0.57        | 0.38            | 0.25       | 0                              | 0.01         | 0.01       | 0.01                | 0.01                  | 0                    | 0            | 0                    | 0           | 0                                                        | 0.21   | 0      | 0.01 | 0    | 1.49     | 0       | 0        | 0    |   |
| TA-AML3_AML35 |                     | 0.02                       | 0.1                                   | 0.08                                                                    | 0.08                                         | 0.02 | 0.03                 | 0.04                 | 0                   | 0           | 0               | 0          | 0                              | 0.01         | 0.01       | 0                   | 0                     | 0                    | 0            | 0.33                 | 0           | 0                                                        | 0.06   | 0      | 0    | 0    | 0        | 0       | 0        | 0    |   |
| TA-AML3_AML5  |                     | 0.04                       | 0.09                                  | 0.08                                                                    | 0.07                                         | 0.01 | 0.07                 | 0.54                 | 0.03                | 0.2         | 0.03            | 0.01       | 0                              | 0            | 0          | 0                   | 0                     | 0.01                 | 0            | 0                    | 0           | 0                                                        | 0.02   | 0.34   | 0.07 | 0    | 0.59     | 0       | 0        | 0    |   |
| TA-AML1_AML10 | TbA-Inv(16)         | 0.59                       | 0.44                                  | 0.69                                                                    | 0.29                                         | 0.18 | 0.28                 | 4.95                 | 0.45                | 1.22        | 0.34            | 1.56       | 0.79                           | 0.31         | 0.21       | 0.17                | 0.09                  | 0                    | 0            | 0                    | 0           | 0                                                        | 0      | 0.06   | 0.36 | 0.87 | 0        | 0       | 0        |      |   |
| TA-AML2_AML32 |                     | 0.1                        | 0.14                                  | 0.16                                                                    | 0.08                                         | 0.04 | 0.56                 | 1.15                 | 0.08                | 0.68        | 0.23            | 0.45       | 0                              | 0.13         | 0.08       | 0.04                | 0                     | 0                    | 0.04         | 0                    | 0           | 0.02                                                     | 0.17   | 0      | 0.31 | 0    | 0        | 0       | 0        |      |   |
| TA-AML3_AP15  | TbA-(15,17)         | 0.02                       | 0.03                                  | 0.23                                                                    | 0.03                                         | 0.43 | 0                    | 0.33                 | 0.02                | 0.07        | 0               | 0          | 0                              | 0            | 0          | 0                   | 0                     | 0                    | 0            | 0                    | 0           | 0.08                                                     | 0      | 0      | 0    | 0.78 | 0        | 0       | 0        | X    |   |
| TA-AML3_AP13  |                     | 0.07                       | 0                                     | 0                                                                       | 0                                            | 0    | 0.13                 | 0.47                 | 0.04                | 0           | 0               | 0          | 0                              | 0.08         | 0.08       | 0.03                | 0                     | 0.01                 | 1.02         | 0.13                 | 0.35        | 0                                                        | 0.1    | 1.02   | 0.05 | 0    | 0.67     | 0       | 0.04     | 0    |   |
| TA-AML2_AP14  |                     | 0.09                       | 0.15                                  | 0                                                                       | 0.65                                         | 0    | 0.05                 | 0.71                 | 0.07                | 0.12        | 0.13            | 0          | 0                              | 0            | 0          | 0.42                | 0                     | 0                    | 0            | 0                    | 0           | 0.05                                                     | 0      | 0      | 0    | 0    | 0.04     | 0.07    | 0        | 0    |   |
| TA-AML1_AML27 | TbA-NI-FLT3-<br>ITD | 0.27                       | 0.15                                  | 0.6                                                                     | 0.12                                         | 0    | 0.61                 | 1.17                 | 0.2                 | 0.23        | 0.27            | 0          | 0.34                           | 0.75         | 0.58       | 0                   | 0                     | 0                    | 0.09         | 0                    | 0           | 13.89                                                    | 0      | 0      | 0.02 | 0    | 0        | 0       | 0        | 0    |   |
| TA-AML3_AML7  |                     | 0.86                       | 1.03                                  | 0                                                                       | 0.85                                         | 1.59 | 4.47                 | 5.48                 | 1.13                | 2.29        | 1.08            | 0.57       | 0.4                            | 1.45         | 0.36       | 0.06                | 0.06                  | 0                    | 0.41         | 0.26                 | 4           | 0                                                        | 0      | 0.02   | 1.82 | 2.94 | 0        | 0       | 0        | 0    | X |
| TA-AML3_AML9  |                     | 0.17                       | 0.27                                  | 0.38                                                                    | 0.25                                         | 0    | 0.51                 | 0.8                  | 0.29                | 0.25        | 0               | 0          | 0.06                           | 0.27         | 0.04       | 0.01                | 0                     | 0.25                 | 0.07         | 0.63                 | 0           | 0.03                                                     | 0.76   | 0.04   | 0    | 0.27 | 0        | 0       | 0        | 0    |   |
| TA-AML2_AML20 |                     | 0.21                       | 0.6                                   | 0                                                                       | 0.97                                         | 0.12 | 0.16                 | 1.57                 | 0.16                | 0.46        | 0.33            | 0.36       | 0                              | 0            | 0          | 0                   | 0                     | 3.49                 | 0.21         | 0                    | 0           | 0.06                                                     | 0      | 0.02   | 0    | 3.89 | 0        | 0       | 0        | 0    |   |
| TA-AML2_AML21 |                     | 0.29                       | 0.38                                  | 1.03                                                                    | 0.35                                         | 0.31 | 0.38                 | 1.63                 | 0.25                | 0.66        | 0               | 0          | 0                              | 0.44         | 0          | 0                   | 0.01                  | 0                    | 0.1          | 2.94                 | 2.08        | 0.1                                                      | 0      | 0.01   | 0    | 0.42 | 0        | 0       | 0        | 0    |   |
| TA-AML2_AML23 |                     | 0.06                       | 0.07                                  | 0.17                                                                    | 0.06                                         | 0.16 | 0.29                 | 0.87                 | 0.03                | 0.15        | 0               | 0.05       | 0                              | 0.34         | 0          | 0                   | 0                     | 0                    | 0.04         | 0                    | 0           | 0                                                        | 0.85   | 0      | 0    | 1.56 | 3.13     | 0       | 0        | X    |   |
| TA-AML2_AML30 |                     | 0.26                       | 0.06                                  | 0                                                                       | 0.06                                         | 0    | 0.48                 | 2.12                 | 0.5                 | 0.08        | 0.02            | 0.2        | 0.22                           | 0.17         | 0.02       | 0.01                | 0                     | 0                    | 0.16         | 0                    | 0           | 0                                                        | 0      | 0.01   | 0    | 1.1  | 0        | 0       | 0        | 0    |   |
| TA-AML2_AML39 |                     | 0.28                       | 0.13                                  | 0                                                                       | 0.14                                         | 0    | 0.49                 | 1.55                 | 0.58                | 0.7         | 0.16            | 0.19       | 0.07                           | 0.18         | 0.1        | 0                   | 0.06                  | 0                    | 0.44         | 0                    | 2.56        | 0                                                        | 0      | 0.25   | 1.58 | 0    | 0        | 0       | 0        | 0    |   |
| TA-AML4_AML37 |                     | 0.43                       | 0.02                                  | 0.01                                                                    | 0.02                                         | 0    | 1.42                 | 0.36                 | 0.44                | 0.24        | 0.87            | 1.15       | 1.22                           | 1.98         | 1.43       | 0.41                | 0.17                  | 0.5                  | 0.33         | 1.2                  | 15.38       | 0                                                        | 0      | 0.04   | 0    | 0.18 | 0.25     | 0       | 0        | 0    |   |
| TA-AML4_AML38 |                     | 0.13                       | 0.13                                  | 0                                                                       | 0.13                                         | 0    | 0.23                 | 0.72                 | 0.17                | 0.17        | 0.08            | 1.41       | 0.05                           | 0.17         | 0.03       | 0.05                | 0                     | 0.03                 | 0.06         | 0                    | 0           | 0.06                                                     | 0.2    | 0      | 0    | 0.77 | 0        | 0       | 0        | 0    |   |
| TA-AML4_AML40 | 0.35                | 1                          | 1.48                                  | 0                                                                       | 0.4                                          | 0.38 | 1.02                 | 0.37                 | 0                   | 0           | 0               | 0          | 0.22                           | 0.22         | 0          | 0.25                | 3.91                  | 0.14                 | 0            | 0                    | 0           | 0.63                                                     | 0.02   | 0      | 0    | 0    | 0        | 0       | 0        |      |   |
| TA-AML3_AML6  | TbA-FLT3-TKD        | 0.11                       | 0                                     | 0                                                                       | 0                                            | 0.07 | 0.09                 | 0.26                 | 0.05                | 0.08        | 0               | 0.2        | 0.1                            | 0            | 0.18       | 0                   | 0                     | 11.11                | 0.17         | 0                    | 0           | 0                                                        | 0      | 0.05   | 0    | 0.13 | 0        | 0       | 0        | 0    |   |
| TA-AML2_AML31 |                     | 0.26                       | 0.09                                  | 0.38                                                                    | 0.04                                         | 0    | 0.22                 | 0.96                 | 0.19                | 0.19        | 0               | 0          | 0                              | 0.46         | 0          | 0                   | 0                     | 0.64                 | 0            | 0                    | 0           | 0                                                        | 0.03   | 0      | 0    | 0    | 0        | 0       | 0        | 0    |   |
| TA-AML4_AML8  |                     | 0.06                       | 0                                     | 0                                                                       | 0                                            | 0    | 0.41                 | 0.12                 | 0.35                | 0.59        | 0.21            | 0.1        | 0                              | 0.28         | 0.03       | 0.07                | 0                     | 0                    | 0            | 0                    | 0           | 0                                                        | 1.04   | 0.01   | 0    | 0    | 0        | 0       | 0        | 0    |   |
| TA-AML1_AML13 | TbA-FLT3wt          | 0.13                       | 0                                     | 0                                                                       | 0                                            | 0.22 | 0.11                 | 0.13                 | 0.14                | 0.76        | 0.23            | 0.36       | 0.11                           | 0.18         | 0.07       | 0.01                | 0                     | 1.18                 | 0.14         | 0.86                 | 0           | 0.3                                                      | 0      | 0.01   | 0    | 0.49 | 0        | 0       | 0.09     | 0    |   |
| TA-AML3_AML36 |                     | 0.05                       | 0.55                                  | 0.6                                                                     | 0                                            | 0    | 0.13                 | 0.3                  | 0.06                | 0.64        | 1.06            | 0          | 0                              | 0.07         | 0          | 0.02                | 0.02                  | 0.33                 | 0.01         | 0.1                  | 0           | 0.12                                                     | 0      | 0      | 0    | 0    | 0        | 0       | 0.01     | 0    |   |
| TA-AML2_AML33 |                     | 0.04                       | 0.69                                  | 0.83                                                                    | 0.32                                         | 0.07 | 1.22                 | 1.34                 | 0.01                | 0.18        | 0               | 0.07       | 0                              | 0.04         | 0          | 0                   | 0                     | 0.17                 | 0.02         | 0                    | 0           | 0.03                                                     | 1.04   | 0.04   | 1.18 | 0.12 | 0        | 0       | 0        | 0    |   |
| TA-AML2_AML42 |                     | 0.06                       | 0                                     | 0                                                                       | 0                                            | 0    | 0.13                 | 0.09                 | 0                   | 0           | 0.24            | 0.11       | 0                              | 0            | 0          | 0                   | 0                     | 0.47                 | 0.45         | 0                    | 0           | 0                                                        | 0.81   | 0.04   | 0    | 0    | 0        | 0       | 0        | 0    |   |
| TA-AML4_AML14 |                     | 0.18                       | 0.17                                  | 0.17                                                                    | 0.17                                         | 0.04 | 0.56                 | 0.64                 | 0.48                | 0.27        | 0               | 0.04       | 0.08                           | 0            | 0.05       | 0                   | 0.02                  | 1.46                 | 0.26         | 0.19                 | 0.15        | 0.12                                                     | 0      | 0.02   | 0    | 0.25 | 0        | 0       | 0        | 0    |   |
| TA-AML4_AML15 | 0.29                | 0.24                       | 0.14                                  | 0.37                                                                    | 0.08                                         | 0.49 | 0.86                 | 0.29                 | 0.22                | 0.49        | 0               | 0.71       | 3.93                           | 0.29         | 0.06       | 0                   | 0                     | 0.12                 | 0.07         | 0                    | 0           | 0                                                        | 0      | 0      | 0    | 0    | 0        | 0       | 0        |      |   |
| TA-AML2_AML22 | TbA-MLL             | 0.37                       | 0.16                                  | 0.38                                                                    | 0.14                                         | 0.06 | 0.27                 | 4.45                 | 0.27                | 0.54        | 0.31            | 0          | 0                              | 0.3          | 0          | 0                   | 0                     | 0                    | 0.1          | 0.19                 | 0           | 0.2                                                      | 0      | 0.1    | 0.91 | 0    | 0        | 0       | 0        |      |   |
| TA-AML1_AML18 |                     | 0.06                       | 2.27                                  | 4.49                                                                    | 1.54                                         | 0.12 | 0.34                 | 0.83                 | 0.05                | 0.02        | 0               | 0          | 0                              | 0.07         | 0          | 0                   | 0                     | 0                    | 0            | 0.03                 | 0           | 0                                                        | 0.05   | 0      | 0    | 0.66 | 0        | 0.01    | 0        | 0    |   |
| TA-AML3_AML4  |                     | 0.16                       | 0.2                                   | 0.18                                                                    | 0.2                                          | 0    | 0.1                  | 0.94                 | 0.42                | 0.46        | 0               | 0          | 0                              | 0.11         | 0.17       | 0.04                | 0.03                  | 0                    | 0.58         | 0.3                  | 0.73        | 0                                                        | 0      | 0      | 0    | 0    | 0        | 0       | 0        | 0    |   |
| TA-AML2_AML19 |                     | 0.16                       | 0.06                                  | 0.07                                                                    | 0.07                                         | 0.08 | 0.4                  | 1.61                 | 0.23                | 0.14        | 0.36            | 0.58       | 0.48                           | 1.94         | 0.32       | 0.35                | 0.02                  | 0.58                 | 0.13         | 0                    | 0.17        | 0.5                                                      | 0.04   | 0      | 0.96 | 0.46 | 0        | 0       | 0        | 0    |   |
| TA-AML2_AML29 |                     | 0.13                       | 0.19                                  | 0.33                                                                    | 0.13                                         | 0.01 | 0.06                 | 0.89                 | 0.07                | 0.25        | 0               | 0          | 0                              | 0.08         | 0.19       | 0                   | 0                     | 0                    | 0            | 0                    | 0           | 0                                                        | 0.07   | 0      | 0.04 | 0.43 | 0        | 0       | 0.04     | 0.05 |   |
| TA-AML2_AML41 | TbA-CmpkMono        | 0.17                       | 0.34                                  | 0.31                                                                    | 0.48                                         | 0    | 0.35                 | 0.87                 | 0.25                | 0.11        | 0.04            | 0.11       | 0.16                           | 0.2          | 0.07       | 0.02                | 0.03                  | 0.66                 | 0.29         | 2.4                  | 0           | 3.13                                                     | 0      | 0.05   | 0    | 0    | 0        | 0.04    | 0.05     |      |   |
| TA-AML4_AML25 |                     | 0.11                       | 0.06                                  | 0.03                                                                    | 0.14                                         | 0.06 | 0.2                  | 0.29                 | 0.3                 | 0           | 0.44            | 0.22       | 0.07                           | 0.43         | 0.25       | 0.03                | 0.04                  | 3.16                 | 0.18         | 1.45                 | 5.88        | 0.21                                                     | 0.3    | 0.01   | 0    | 0.39 | 0        | 0.07    | 0        |      |   |
| TA-AML1_N1    | TbA-Normal          | 0.03                       | 0                                     | 0                                                                       | 0                                            | 0    | 0.82                 | 0.12                 | 0.2                 | 0           | 0               | 0          | 0.02                           | 0            | 0.06       | 0.01                | 0.01                  | 0                    | 0            | 0                    | 0.04        | 0.25                                                     | 0.82   | 0.04   | 0.22 | 0.57 | 0        | 0       | 0        | 0    |   |
| TA-AML1_N1-3  |                     | 0.02                       | 0                                     | 0                                                                       | 0                                            | 0    | 0.1                  | 0.82                 | 0.03                | 0           | 0               | 0.1        | 0                              | 0.05         | 0          | 0                   | 0.01                  | 0                    | 0            | 0.08                 | 0           | 0.19                                                     | 0.08   | 0      | 0.01 | 0.1  | 0        | 0.06    | 0        | 0    |   |
| TA-AML1_N1-5  |                     | 0.02                       | 0.54                                  | 0                                                                       | 1.34                                         | 0    | 0                    | 0                    | 0.04                | 0.09        | 0               | 0.12       | 0                              | 0.04         | 0.01       | 0                   | 0.01                  | 0                    | 0            | 0                    | 0           | 0.2                                                      | 0.15   | 0      | 0.01 | 0    | 0        | 0       | 0        | 0    |   |
| TA-AML1_N1-6  |                     | 0.02                       | 0                                     | 0                                                                       | 0                                            | 0    | 0.04                 | 0.1                  | 0.06                | 0.04        | 0               | 0.04       | 0                              | 0.04         | 0.01       | 0.01                | 0                     | 0.04                 | 0.02         | 0                    | 0.25        | 0                                                        | 0.19   | 0      | 0.14 | 0    | 0        | 0       | 0        | 0    |   |
| TA-AML3_N1-6  |                     | 0.01                       | 0.11                                  | 0                                                                       | 0.29                                         | 0    | 0                    | 0                    | 0.05                | 0           | 0               | 0          | 0.13                           | 0.04         | 0.01       | 0                   | 0.01                  | 0.01                 | 0.07         | 0                    | 0           | 0.18                                                     | 0.05   | 0.14   | 0.01 | 0.09 | 0        | 0       | 0        | 0    |   |
| TA-AML3_N1-4  |                     | 0.02                       | 0                                     | 0                                                                       | 0                                            | 0    | 0.27                 | 0.28                 | 0                   | 0.04        | 0.02            | 0.12       | 0                              | 0.03         | 0          | 0.01                | 0.01                  | 0                    | 0            | 0                    | 0           | 0.19                                                     | 0.02   | 0.39   | 0.01 | 0    | 0        | 0       | 0        | 0    |   |
| TA-AML3_N1-5  |                     | 0.03                       | 0.27                                  | 0.48                                                                    | 0                                            | 0    | 0.15                 | 0.09                 | 0                   | 0           | 0.04            | 0.1        | 0.04                           | 0.05         | 0          | 0.01                | 0.01                  | 0                    | 0.01         | 0                    | 0           | 0.08                                                     | 0      | 0      | 0    | 0.32 | 0        | 0       | 0        | 0    |   |
| TA-AML2_N1-6  |                     | 0.01                       | 0                                     | 0                                                                       | 0                                            | 0    | 0.15                 | 0.02                 | 0                   | 0           | 0               | 0          | 0                              | 0.02         | 0          | 0                   | 0                     | 0                    | 0            | 0                    | 0           | 0.12                                                     | 0.02   | 0      | 0    | 0.18 | 0        | 0.04    | 0        |      |   |
| TA-AML2_N1-3  |                     | 0.01                       | 0.22                                  | 0                                                                       | 0.65                                         | 0    | 0                    | 0.08                 | 0                   | 0           | 0               | 0.02       | 0                              | 0.04         | 0.01       | 0                   | 0                     | 0                    | 0            | 0                    | 0           | 0.35                                                     | 0.05   | 0      |      |      |          |         |          |      |   |
