# Supplementary material
Source: PubMed Central journal article supplement (PMC4652947)
Supplement: NIHMS702883-supplement-7.pdf [file NIHMS702883-supplement-7.pdf]

**Supplementary Table 5:** Number of cell events collected for each sample. Most samples were run as part of one experiment with two tubes stained in parallel on day 1 and analyzed on separate subsequent days (day 2 and day 3 respectively). Four separate experiments were performed on each of 4 consecutive weeks. Normal sample aliquots were run several times as indicated. Normal sample #6 was run in each experiment.

\* Three patient samples were run in two experiments due to low cell numbers.

| Sample   | Subtype                 | Experiment | Tube A  | Tube B  | Total   |
|----------|-------------------------|------------|---------|---------|---------|
| AML5     | CBF-AML                 | 3          | 227,542 | 232,592 | 460,134 |
| AML10    | CBF-AML                 | 1          | 336,309 | 334,051 | 670,360 |
| AML26    | CBF-AML                 | 1          | 319,412 | 311,496 | 630,908 |
| AML32    | CBF-AML                 | 2          | 265,530 | 283,421 | 548,951 |
| AML35    | CBF-AML                 | 3          | 223,607 | 213,658 | 437,265 |
|          |                         |            |         |         |         |
| APL1     | APL                     | 4          | 248,872 | 228,373 | 477,245 |
| APL3     | APL                     | 3          | 229,998 | 227,732 | 457,730 |
| APL4     | APL                     | 2          | 288,857 | 307,251 | 596,108 |
| APL5     | APL                     | 3          | 272,205 | 277,628 | 549,833 |
|          |                         |            |         |         |         |
| AML7     | NK-AML, FLT3-ITD+       | 3          | 241,411 | 243,092 | 484,503 |
| AML9     | NK-AML, FLT3-ITD+       | 3          | 250,621 | 258,840 | 509,461 |
| AML20    | NK-AML, FLT3-ITD+       | 2          | 276,982 | 283,359 | 560,341 |
| AML21    | NK-AML, FLT3-ITD+       | 2          | 314,465 | 326,144 | 640,609 |
| AML23    | NK-AML, FLT3-ITD+       | 2          | 294,635 | 312,470 | 607,105 |
| AML27    | NK-AML, FLT3-ITD+       | 1          | 333,187 | 333,245 | 666,432 |
| AML30    | NK-AML, FLT3-ITD+       | 2          | 298,395 | 322,604 | 620,999 |
| AML37    | NK-AML, FLT3-ITD+       | 4          | 236,882 | 218,131 | 455,013 |
| AML38    | NK-AML, FLT3-ITD+       | 4          | 246,472 | 221,169 | 467,641 |
| AML39    | NK-AML, FLT3-ITD+       | 2          | 287,061 | 303,146 | 590,207 |
| AML40    | NK-AML, FLT3-ITD+       | 4          | 100,060 | 87,869  | 187,929 |
|          |                         |            |         |         |         |
| AML6     | NK-AML, FLT3-TKD+       | 3          | 278,211 | 285,905 | 564,116 |
| AML8 *   | NK-AML, FLT3-TKD+       | 1 & 4      | 148,487 | 127,887 | 276,374 |
| AML31    | NK-AML, FLT3-TKD+       | 2          | 309,861 | 319,616 | 629,477 |
|          |                         |            |         |         |         |
| AML13    | NK-AML, FLT3wt          | 1          | 88,210  | 85,349  | 173,559 |
| AML14    | NK-AML, FLT3wt          | 4          | 101,815 | 85,703  | 187,518 |
| AML15    | NK-AML, FLT3wt          | 4          | 117,101 | 96,094  | 213,195 |
| AML33    | NK-AML, FLT3wt          | 2          | 277,193 | 277,430 | 554,623 |
| AML36    | NK-AML, FLT3wt          | 3          | 96,282  | 93,106  | 189,388 |
| AML42    | NK-AML, FLT3wt          | 2          | 44,938  | 44,487  | 89,425  |
|          |                         |            |         |         |         |
| AML22    | ARK-AML; MLL rearranged | 2          | 152,581 | 159,773 | 312,354 |
|          |                         |            |         |         |         |
| AML4     | ARK-AML                 | 3          | 89,035  | 88,473  | 177,508 |
| AML18    | ARK-AML                 | 1          | 347,795 | 351,682 | 699,477 |
| AML19    | ARK-AML                 | 2          | 251,694 | 265,109 | 516,803 |
| AML25 *  | ARK-AML                 | 1 & 4      | 163,052 | 134,988 | 298,040 |
| AML29    | ARK-AML                 | 2          | 152,288 | 159,454 | 311,742 |
| AML41    | ARK-AML                 | 2          | 76,498  | 79,676  | 156,174 |
|          |                         |            |         |         |         |
| Normal 1 | Healthy Donor           | 1          | 310,055 | 313,451 | 623,506 |
| Normal 3 | Healthy Donor           | 1          | 297,005 | 297,920 | 594,925 |
| Normal 5 | Healthy Donor           | 1          | 330,691 | 329,280 | 659,971 |
| Normal 6 | Healthy Donor           | 1          | 380,589 | 379,966 | 760,555 |
| Normal 3 | Healthy Donor           | 2          | 348,656 | 370,087 | 718,743 |
| Normal 4 | Healthy Donor           | 2          | 333,421 | 354,672 | 688,093 |
| Normal 6 | Healthy Donor           | 2          | 326,660 | 347,230 | 673,890 |
| Normal 4 | Healthy Donor           | 3          | 398,964 | 394,617 | 793,581 |
| Normal 5 | Healthy Donor           | 3          | 259,701 | 262,042 | 521,743 |
| Normal 6 | Healthy Donor           | 3          | 288,236 | 288,922 | 577,158 |
| Normal 3 | Healthy Donor           | 4          | 283,988 | 259,468 | 543,456 |
| Normal 4 | Healthy Donor           | 4          | 306,424 | 287,247 | 593,671 |
| Normal 5 | Healthy Donor           | 4          | 274,390 | 256,244 | 530,634 |
| Normal 6 | Healthy Donor           | 4          | 341,803 | 318,651 | 660,454 |

|       |                                                                        |       |         |         |         |
|-------|------------------------------------------------------------------------|-------|---------|---------|---------|
| CR2   | Complete Response; Originally NK-AML, FLT3wt                           | 4     | 279,705 | 256,425 | 536,130 |
| CR3   | Complete Response; Originally NK-AML, FLT3-ITD+                        | 3     | 282,978 | 286,051 | 569,029 |
| CR5   | Complete Response Incomplete Count Recovery; Originally NK-AML, FLT3wt | 4     | 56,925  | 46,847  | 103,772 |
| CR6   | Complete Response Incomplete Count Recovery; Originally NK-AML, FLT3wt | 1     | 144,153 | 137,125 | 281,278 |
| CR7 * | Complete Response Incomplete Count Recovery; Originally ARK-AML        | 1 & 4 | 124,356 | 108,874 | 233,230 |

**Total Cells Analyzed:**  
26,632,366

**Averages:**

**All Samples**  
484,224.8

**AML**  
443,570.8

**Healthy Donor**  
638,598.6

**CR / Cri**  
344,687.8
